# Supplementary material for: 1,3-Dipolar cycloadditions from tricyclic hemiaminals. Synthesis of the quinocarcin core through catalyst-free generation of azomethine ylides
Source: Royal Society of Chemistry journal article supplement (doi:10.1039/c1ob05181d), 2011-01-01

**1,3-Dipolar cycloadditions from tricyclic hemiaminals. Synthesis of the quinocarcin core through catalyst-free generation of azomethine ylides**

**Lena Huck<sup>[a]</sup>, J. Francisco González<sup>[a]</sup>, Elena de la Cuesta<sup>[a]</sup>, J. Carlos Menéndez,<sup>[a]</sup> and Carmen Avendaño\*<sup>[a]</sup>**

*Departamento de Química Orgánica y Farmacéutica, Facultad de Farmacia, Universidad Complutense, 28040 Madrid (Spain)*

*E-mail: [avendano@farm.ucm.es](mailto:avendano@farm.ucm.es)*

## 1.- Synthesis and Characterization Data

### One-pot synthesis of compounds **1**.

To a stirred solution of 1-acetyl-3-(2,5-dimethoxybenzyl)-piperazine-2,5-dione (3.26 mmol) in dry DCM (50 mL) were added TMSCl (4.9 mmol) and triethylamine (4.9 mmol) and the mixture was stirred under an argon atmosphere at room temperature for 1 h. Then, the corresponding dimethyl acetal (6.52 mmol) and TMSOTf (9.78 mmol) were added and this mixture was stirred for 12 h at room temperature or for additional 48 h at reflux conditions (for compound **1b**). The reaction was quenched with a 10% aqueous solution of NaHCO<sub>3</sub> (50 mL) and extracted with DCM (30 mL x 3). The combined extracts were washed with H<sub>2</sub>O (20 mL) and with a saturated aqueous solution of NaCl (20 mL), dried over anhydrous Na<sub>2</sub>SO<sub>4</sub>, filtered, and concentrated in vacuo, to give a residue that was purified by flash column chromatography on silica gel.

### (6*S*\*,11*aS*\*) Methyl 7,10-dimethoxy-1,4-dioxo-1,2,3,4,11, 11*a*-hexahydro-6*H*-pyrazino[1,2-*b*]isoquinoline-6-carboxylate (**1b**).

Purification by flash chromatography on silica gel with methanol/dichloromethane (1:9) as eluent give **1b** (54%) as a yellow solid. Mp 160-161 °C; IR  $\nu_{\text{max}}$  (film): 1661, 1628 and 1563 cm<sup>-1</sup>; <sup>1</sup>H NMR (250 MHz, CDCl<sub>3</sub>)  $\delta$ : 6.74 (d, *J* = 8.8 Hz, 1H), 6.69 (d, *J* = 8.8 Hz, 1H), 6.45 (s, 1H), 6.08 (ws, 1H), 4.43 (dd, *J* = 11.7 and 4.6 Hz, 1H), 4.17 (d, *J* = 16.5 Hz, 1H), 4.07 (d, *J* = 16.5 Hz, 1H), 3.76 (s, 6H), 3.72 (s, 3H), 3.42 (dd, *J* = 17.5 and 4.6 Hz, 1H), 2.80 (dd, *J* = 17.5 and 11.7 Hz, 1H); <sup>13</sup>C NMR (63 MHz, CDCl<sub>3</sub>)  $\delta$ : 169.5, 167.2, 161.9, 150.9, 150.4, 122.6, 120.1, 109.6, 108.4, 55.8, 55.7, 53.0, 52.9, 51.3, 44.8, 27.4. HRMS (negative ESI), *m/z*: Calcd for C<sub>16</sub>H<sub>18</sub>N<sub>2</sub>O<sub>6</sub>: 334.11649 (M<sup>+</sup>). Found: 333.10921 (M<sup>+</sup> - 1). Anal. calcd. for C<sub>16</sub>H<sub>18</sub>N<sub>2</sub>O<sub>6</sub>: C, 57.48; H, 5.43; N, 8.38. Found: C, 57.05; H, 5.12; N, 7.98.

**(6*R*\*,11*aS*\*)-6-Benzoyloxymethyl-7,10-dimethoxy-2,3,11,11*a*-tetrahydro-6*H*-pyrazino[1,2-*b*]isoquinoline-1,4-dione (**1c**).**

Purification by flash chromatography on silica gel with methanol/ethyl acetate (1:9) as eluent give **1c** (77%) as a brown oil. IR  $\nu_{\max}$  (film): 3630, 2980, 1698 and 1491  $\text{cm}^{-1}$ ;  $^1\text{H}$  NMR (250 MHz,  $\text{CDCl}_3$ )  $\delta$ : 7.30-7.10 (m, 5H), 6.64 (d,  $J = 8.9$  Hz, 1H), 6.59 (d,  $J = 8.9$  Hz, 1H), 6.46 (s, 1H), 6.07 (dd,  $J = 7.2$  and 3.6 Hz, 1H), 4.61 (d,  $J = 12.0$  Hz, 1H), 4.52 (dd,  $J = 12.5$  and 4.6 Hz, 1H), 4.36 (d,  $J = 12.0$  Hz, 1H), 4.02 (s, 2H), 3.79 (m, 2H), 3.69 (s, 3H), 3.66 (s, 3H), 3.40 (dd,  $J = 17.4$  and 4.6 Hz, 1H), 2.61 (dd,  $J = 17.4$  and 12.5 Hz, 1H);  $^{13}\text{C}$  NMR (63 MHz,  $\text{CDCl}_3$ )  $\delta$ : 167.7, 161.5, 151.0, 150.0, 138.0, 128.3, 127.8, 127.6, 123.0, 122.0, 108.6, 108.0, 72.6, 68.9, 55.6, 55.4, 51.5, 48.3, 44.8, 28.2. HRMS (negative ESI),  $m/z$ : Calcd for  $\text{C}_{22}\text{H}_{24}\text{N}_2\text{O}_5$ : 396.16852 ( $\text{M}^+$ ). Found: 395.16125 ( $\text{M}^+ - 1$ ). Anal. calcd. for  $\text{C}_{22}\text{H}_{24}\text{N}_2\text{O}_5$ : C, 66.65; H, 6.10; N, 7.07. Found: C, 66.39; H, 5.88; N, 6.83.

**General procedure for the synthesis of compounds 2b-c**

A solution of compounds **1** (9.1 mmol), triethylamine (54 mmol) and 4-dimethylaminopyridine (27 mmol) in dry DCM (140 mL) was cooled in ice water, and isopropyl chloroformate (18 mmol) was added dropwise. The solution was stirred under argon atmosphere for 16h at room temperature and then, water (50 mL) was added. After extraction with DCM (20 mL x 3), the extracts were washed with HCl (25 mL x 3),  $\text{H}_2\text{O}$  (30 mL) and with saturated aqueous solution of NaCl (30 mL), dried over anhydrous  $\text{Na}_2\text{SO}_4$ , filtered and concentrated in vacuo to give a residue that was purified by flash column chromatography on silica gel.

**(6*S*\*,11*aS*\*) Methyl 2-isopropoxycarbonyl-7,10-dimethoxy-1,4-dioxo-1,2,3,4,11,11*a*-hexahydro-6*H*-pyrazino[1,2-*b*] isoquinoline-6-carboxylate (**2b**).** The residue was purified by flash column chromatography on silica gel with hexane/ethyl acetate (7:3) as eluent to give **2b** (95%) as a white solid. Mp 164-165  $^{\circ}\text{C}$ ; IR  $\nu_{\max}$  (film): 2981, 1921, 1628 and 1501  $\text{cm}^{-1}$ ;  $^1\text{H}$  NMR (250 MHz,  $\text{CDCl}_3$ )  $\delta$ : 6.82 (d,  $J = 9.0$  Hz, 1H), 6.72 (d,  $J = 9.0$  Hz, 1H), 6.48 (s, 1H), 5.13 (sept,  $J = 6.2$  Hz, 1H), 4.64 (dd,  $J = 7.9$  and 6.3 Hz, 1H), 4.52 (d,  $J = 17.2$  Hz, 1H), 4.50 (d,  $J = 17.2$  Hz, 1H), 3.86 (s, 6H), 3.76 (s, 3H), 3.32 (dd,  $J = 17.0$  and 7.9 Hz, 1H), 3.20 (dd,  $J = 17.0$  and 6.3 Hz, 1H), 1.37 (d,  $J =$

6.2 Hz, 1H);  $^{13}\text{C}$  NMR (63 MHz,  $\text{CDCl}_3$ )  $\delta$ : 169.5, 165.7, 163.4, 150.7, 150.1, 122.4, 120.6, 110.2, 108.9, 72.5, 55.9, 54.8, 52.9, 50.6, 47.8, 24.5, 21.6. HRMS (negative ESI),  $m/z$ : Calcd for  $\text{C}_{20}\text{H}_{24}\text{N}_2\text{O}_8$ : 420.15327 ( $\text{M}^+$ ). Found: 419.14599 ( $\text{M}^+ - 1$ ). Anal. calcd. for  $\text{C}_{20}\text{H}_{24}\text{N}_2\text{O}_8$ : C, 57.14; H, 5.75; N, 6.66. Found: C, 56.85; H, 5.48; N, 6.21.

**(6*R*\*,11*aS*\*)-6-Benzoyloxymethyl-2-isopropoxycarbonyl-7,10-dimethoxy-2,3,11,11*a*-tetrahydro-6*H*-pyrazino[1,2-*b*]isoquinoline-1,4-dione (2c).** The residue was purified by flash column chromatography on silica gel with hexane/ethyl acetate (8:2) as eluent to give **2c** (77%) as a brown oil. IR  $\nu_{\text{max}}$  (film): 3439, 2982, 1779, 1670 and 1494  $\text{cm}^{-1}$ ;  $^1\text{H}$  NMR (250 MHz,  $\text{CDCl}_3$ )  $\delta$ : 7.30-7.10 (m, 5H), 6.73 (d,  $J = 9.0$  Hz, 1H), 6.71 (d,  $J = 9.0$  Hz, 1H), 6.10 (dd,  $J = 7.8$  and 3.4 Hz, 1H), 5.16 (sept,  $J = 6.3$  Hz, 1H), 4.69 (dd,  $J = 11.5$  and 5.0 Hz, 1H), 4.68 (d,  $J = 12.0$  Hz, 1H), 4.54 (d,  $J = 17.7$  Hz, 1H), 4.45 (d,  $J = 12.0$  Hz, 1H), 4.27 (d,  $J = 17.7$  Hz, 1H), 3.84 (m, 1H), 3.73 (m, 3H), 3.69 (s, 3H), 3.64 (dd,  $J = 11.0$  and 7.8 Hz, 1H), 3.38 (dd,  $J = 17.2$  and 5.1 Hz, 1H), 2.85 (dd,  $J = 17.2$  and 11.5 Hz, 1H), 1.40 (d,  $J = 6.3$  Hz, 6H);  $^{13}\text{C}$  NMR (63 MHz,  $\text{CDCl}_3$ )  $\delta$ : 166.2, 162.0, 151.2, 150.8, 149.7, 137.9, 128.2, 127.7, 127.6, 122.8, 121.8, 108.7, 108.1, 72.5, 72.9, 68.9, 55.6, 55.3, 53.4, 48.4, 47.6, 27.4, 21.6. HRMS (negative ESI),  $m/z$ : Calcd for  $\text{C}_{26}\text{H}_{30}\text{N}_2\text{O}_7$ : 482.21201 ( $\text{M}^+$ ). Found: 481.19802 ( $\text{M}^+ - 1$ ). Anal. calcd. for  $\text{C}_{26}\text{H}_{30}\text{N}_2\text{O}_7$ : C, 64.72; H, 6.27; N, 5.81. Found: C, 64.41; H, 5.96; N, 5.61.

**(6*R*\*,11*aS*\*)-2-isopropoxycarbonyl-7,10-dimethoxy-6-naphtyloxymethyl-2,3,11,11*a*-tetrahydro-6*H*-pyrazino[1,2-*b*]isoquinoline-1,4-dione (2d).** To a solution of **2c** (400 mg, 0.83 mmol) and Pd/C (66 mg) in ethanol (4 mL) was stirred under hydrogen atmosphere (3 atm.), at 70 °C, for 3.5 h. Then, was filtered through celite and the solvent was concentrated in vacuo to give an oil residue. The unpurified crude was used in the next step. A solution of this crude, EDC (2.3 mmol), 4-dimethylaminopyridine (1.21 mmol) and naphthoic acid (1.2 mmol) in dry DCM (20 mL) was stirred under argon atmosphere for 20 h at room temperature. Then the solvent was evaporated and the residue was dissolved in AcOEt (150 mL), the organic solution was washed with HCl 0.1 N (50 mL),  $\text{NaHCO}_3$  (50 mL),



H<sub>2</sub>O (30 mL) and a saturated aqueous solution of NaCl (30 mL), dried over anhydrous Na<sub>2</sub>SO<sub>4</sub>, filtered and concentrated in vacuo to give a residue that was purified by flash column chromatography on silica gel with hexane/ethyl acetate mixture (8:2) as eluent to give **2d** as a brown oil (265 mg, 44%). IR  $\nu_{\text{max}}$  (film): 2981, 1780, 1509 cm<sup>-1</sup>; <sup>1</sup>H NMR (250 MHz, CDCl<sub>3</sub>)  $\delta$ : 8.82 (d,  $J$  = 7.9 Hz, 1H), 8.19 (dd,  $J$  = 7.3 and 1.1 Hz, 1H), 8.04 (d,  $J$  = 8.1 Hz, 1H), 7.90 (dd,  $J$  = 7.3 and 1.7 Hz, 1H), 7.54 (m, 3H), 6.79 (m, 2H), 6.34 (dd,  $J$  = 9.0 and 3.3 Hz, 1H), 5.07 (sept,  $J$  = 6.2 Hz, 1H), 4.91 (dd,  $J$  = 11.6 and 9.0 Hz, 1H), 4.80 (dd,  $J$  = 11.4 and 5.0 Hz, 1H), 4.69 (dd,  $J$  = 11.6 and 3.3 Hz, 1H), 4.41 (d,  $J$  = 17.8 Hz, 1H), 4.29 (d,  $J$  = 17.8 Hz, 1H), 3.88 (s, 3H), 3.83 (s, 3H), 3.52 (dd,  $J$  = 17.3 and 5.0 Hz, 1H), 2.95 (dd,  $J$  = 17.3 and 11.4 Hz, 1H), 1.33 (d,  $J$  = 6.2 Hz, 6H); <sup>13</sup>C NMR (63 MHz, CDCl<sub>3</sub>)  $\delta$ : 167.2, 166.2, 165.8, 151.1, 151.0, 149.9, 133.7, 133.6, 131.3, 130.6, 128.5, 127.8, 126.4, 126.2, 125.6, 124.6, 122.9, 120.6, 109.4, 108.4, 72.4, 63.1, 55.7, 55.6, 53.5, 48.4, 47.6, 27.2, 21.6. HRMS (negative ESI),  $m/z$ : Calcd for C<sub>30</sub>H<sub>30</sub>N<sub>2</sub>O<sub>8</sub>: 546.20022 (M<sup>+</sup>). Found: 545.19305 (M<sup>+</sup> - 1). Anal. calcd. for C<sub>30</sub>H<sub>30</sub>N<sub>2</sub>O<sub>8</sub> C, 65.92; H, 5.53; N, 5.13; Found: C, 65.50; H, 5.46; N, 5.22.

#### General procedure for the synthesis of hemiaminals **3** and **8**.

To a stirred solution of lithium tri-*tert*-butoxide aluminum hydride (8.12 mmol) in dry THF (50 mL) cooled in ice water was added a solution of compounds **2** or **7** (2.7 mmol) in dry THF, and the mixture was stirred under an argon atmosphere at room temperature for 16 h. The reaction mixture was quenched by addition of ice, filtered over celite, and extracted with ethyl acetate. The organic phases were washed with H<sub>2</sub>O and with a saturated aqueous solution of NaCl, dried over anhydrous Na<sub>2</sub>SO<sub>4</sub>, filtered, and concentrated *in vacuo*.

**(1R\*,6R\*,11aS\* and 1S\*,6R\*,11aS\*)-1-Hydroxy-2-isopropoxycarbonyl-7,10-dimethoxy-6-methyl-1,2,3,6,11,11a-hexahydropyrazino[1,2-*b*]isoquinolin-4-one (3a).**

According to the general procedure compound **3a** (86%) was obtained as a crude product in a 7/3 diastereoisomer mixture. IR  $\nu_{\text{max}}$  (film): 3325, 2979, 1704 and 1634 cm<sup>-1</sup>; <sup>1</sup>H NMR (250 MHz, CDCl<sub>3</sub>)  $\delta$ : 6.67 (s, 2H), 5.93 (q,  $J$  = 6.4 Hz, 1H), 5.84 (ws, 1H), 4.93 (sept,  $J$  = 6.1

Hz, 1H), 4.34 (m, 1H), 4.30 (d,  $J = 17.5$  Hz, 0.3H), 4.02 (m, 2H), 3.78 (s, 4.2H), 3.76 (s, 1.8 H), 3.20 (dd,  $J = 17.2$  and 8.0 Hz, 0.3H), 2.96 (dd,  $J = 17.2$  and 7.5 Hz, 1H), 2.49 (m, 1H), 1.52 (d,  $J = 7.2$ , 2.1H), 1.40 (d,  $J = 6.5$ , 1.3H), 1.31 (d,  $J = 6.5$ , 6H), 1.27 (m, 6H), 1.20 (d,  $J = 6.0$ , 1.3H).  $^{13}\text{C}$  NMR (63 MHz,  $\text{CDCl}_3$ )  $\delta$ : 176.8, 165.2, 163.0, 150.8, 150.3, 149.8, 149.2, 127.7, 126.5, 122.3, 121.5, 107.8, 107.7, 107.6, 76.3, 76.2, 70.1, 70.0, 55.5, 55.4, 52.6, 50.8, 44.8, 44.1, 43.9, 43.4, 23.8, 21.8, 18.9, 18.3. HRMS (negative ESI),  $m/z$ : Calcd for  $\text{C}_{19}\text{H}_{26}\text{N}_2\text{O}_6$ : 378.17909 ( $\text{M}^+$ ). Found: 377.17181 ( $\text{M}^+ - 1$ ).

**(1*R*\*,6*R*\*,11*aS*\* and 1*S*\*,6*R*\*,11*aS*\*)-6-Benzylloxymethyl-1-hydroxy-2-isopropoxycarbonyl-7,10-dimethoxy-1,2,3,6,11,11*a*-hexahydropyrazino[1,2-*b*] isoquinolin-4-one (3c).**

Compound **3c** was unstable and could not be purified, being stored at - 5 °C. This crude product was used to obtain compounds **5** and **6** (see below).

**2-Isopropoxycarbonyl-7,10-dimethoxy-6-methyl-1,2,3,6-tetrahydropyrazino[1,2-*b*] isoquinolin-4-one (4).**

Compound **3a** (0.26 mmol) was dissolved in toluene (5 mL) and acrylonitrile (5 eq) was added. The reaction was carried out in a sealed tube for 48 h at 120 °C. Then the solvent was removed *in vacuo* and the residue was purified by column chromatography on silica gel with hexane/ethyl acetate (7:3) as eluent to give the compound **4** (32%) as a yellow oil. IR  $\nu_{\text{max}}$  (film): 2979, 1702 and 1648  $\text{cm}^{-1}$ ;  $^1\text{H}$  NMR (250 MHz,  $\text{CDCl}_3$ )  $\delta$ : 6.71 (s, 2H), 6.23 (ws, 1H), 6.05 (q,  $J = 6.5$  Hz, 1H), 4.95 (sept,  $J = 6.4$  Hz, 1H), 4.71 (m, 1H), 4.54 (d,  $J = 18.4$  Hz, 1H), 4.11 (d,  $J = 18.4$  Hz, 1H), 3.96 (m, 1H), 3.81 (s, 6H), 1.28 (m, 3H), 1.27 (m, 6H);  $^{13}\text{C}$  NMR (63 MHz,  $\text{CDCl}_3$ )  $\delta$ : 163.4, 154.0, 148.8, 148.2, 128.8, 123.1, 119.1, 109.7, 109.5, 101.3, 69.7, 55.9, 55.6, 48.3, 44.4, 22.1, 18.8. HRMS (negative ESI),  $m/z$ : Calcd for  $\text{C}_{19}\text{H}_{24}\text{N}_2\text{O}_5$ : 360.16852 ( $\text{M}^+$ ). Found: 383.15774 ( $\text{M}^+ + \text{Na}$ ). Anal. calcd. for  $\text{C}_{19}\text{H}_{24}\text{N}_2\text{O}_5$ : C, 63.32; H, 6.71; N, 7.77. Found: C, 63.03; H, 6.42; N, 7.35.

## Synthesis of **5** and **6**

To a solution of compound **3c** (140 mg, 0.3 mmol) in anhydrous DCM (3 mL) was added TFA (1.16 mL, 15 mmol). The reaction was stirred for 3.5 h at room temperature and, then the reaction was concentrated to dryness *in vacuo*. The residue was dissolved in anhydrous DCM (3 mL) and cooled in ice water. After addition of acrolein (0.4 mL, 6 mmol) and Et<sub>3</sub>N (0.42 mL, 3 mmol) the mixture was stirred at room temperature for 3.5 h and extracted with AcOEt (20 mL x 2). The extracts were washed with NH<sub>4</sub>Cl (30 mL), H<sub>2</sub>O (30 mL) and a saturated aqueous solution of NaCl (30 mL), dried over anhydrous Na<sub>2</sub>SO<sub>4</sub>, filtered and concentrated *in vacuo* to give a residue, that was purified by flash column chromatography on silica gel with hexane/ethyl acetate (7:3) as eluent to give **5** as an orange solid (25%) and **6** as a yellow solid (43%).

**6-Benzylloxymethyl-2-isopropoxycarbonyl-7,10-dimethoxy-2,3,6,11-tetrahydropyrazino[1,2-*b*]isoquinoline-4-one (**5**).** Mp 64-65 °C; IR  $\nu_{\text{max}}$ (film): 2980, 1649 and 1599 cm<sup>-1</sup>; <sup>1</sup>H NMR (300 MHz, CDCl<sub>3</sub>)  $\delta$ : 7.19 (m, 5H), 6.63 (d, *J* = 7.5 Hz, 1H), 6.66 (d, *J* = 7.5 Hz, 1H), 6.31 (dd, *J* = 7.0 and 3.0 Hz, 1H), 6.12 (br s, 1H), 4.84 (sept, *J* = 6.5 Hz, 1H), 4.62 (d, *J* = 12.0 Hz, 1H), 4.45 (m, 2H), 4.33 (d, *J* = 12.0 Hz, 1H), 4.06 (d, *J* = 18.6 Hz, 1H), 3.83 (m, 1H), 3.71 (s, 3H), 3.69 (s, 3H), 3.38 (dd, *J* = 10.8 and 3.3 Hz, 1H), 1.28 (m, 6H). <sup>13</sup>C NMR (85 MHz, CDCl<sub>3</sub>)  $\delta$ : 164.2, 154.1, 149.3, 148.4, 138.4, 128.3, 127.7, 127.5, 120.9, 120.8, 118.7, 110.3, 109.7, 72.6, 69.7, 69.1, 56.0, 55.6, 48.2, 47.0, 35.9, 22.2. HRMS (negative ESI), *m/z*: Calcd for C<sub>26</sub>H<sub>30</sub>N<sub>2</sub>O<sub>6</sub>: 466.21039 (M<sup>+</sup>). Found: 489.19961 (M<sup>+</sup> + Na). Anal. calcd. for C<sub>26</sub>H<sub>30</sub>N<sub>2</sub>O<sub>6</sub>: C, 66.94; H, 6.48; N, 6.00. Found: C, 66.71; H, 6.23; N, 5.84.

**6-Benzylloxymethyl-2-isopropoxycarbonyl-7,10-dimethoxy-1,2,3,6-tetrahydropyrazino[1,2-*b*]isoquinolin-4-one (**6**).** Mp 64-65 °C; IR  $\nu_{\text{max}}$  (film): 2934, 1649 and 1452 cm<sup>-1</sup>; <sup>1</sup>H NMR (250 MHz, CDCl<sub>3</sub>)  $\delta$ : 7.00–7.20 (m, 7H), 6.51 (s, 1H), 6.38 (dd, *J* = 8.9 and 3.8 Hz, 1H), 4.98 (sept, *J* = 5.2 Hz, 1H), 4.78 (d, *J* = 11.9 Hz, 1H), 4.51 (d, *J* = 12.3 Hz, 1H), 4.42 (d, *J* = 11.9 Hz, 1H), 4.21 (d, *J* = 12.3 Hz, 1H), 3.69

(s, 3H), 3.65 (s, 3H), 3.61 (dd,  $J = 10.8$  and  $8.9$  Hz, 1H), 3.44 (dd,  $J = 10.8$  and  $3.8$  Hz, 1H), 4.00 (m, 2H), 1.29 (m, 6H);  $^{13}\text{C}$  NMR (63 MHz,  $\text{CDCl}_3$ )  $\delta$ : 164.3, 154.1, 150.5, 148.4, 140.5, 138.2, 133.7, 128.8, 128.5, 128.3, 127.8, 127.7, 127.6, 126.2, 119.2, 112.5, 72.8, 69.7, 69.5, 62.1, 55.8, 48.2, 47.2, 35.9, 22.2. Anal. calcd. for  $\text{C}_{26}\text{H}_{30}\text{N}_2\text{O}_6$ : C, 66.94; H, 6.48; N, 6.00. Found: C, 66.61; H, 6.19; N, 5.79.

### General procedure for compounds 7

A solution of **2a**, **2b** or **2d** (6.9 mmol), AIBN (0.69 mmol) and NBS (8.3 mmol) in  $\text{CCl}_4$  (70 mL) was refluxed under an argon atmosphere for 16 h. The unreacted NBS was filtered from the cooled reaction, the solvent was evaporated under reduced pressure, and the residue was purified by flash column chromatography on silica gel.

**Methyl 2-isopropoxycarbonyl-7,10-dimethoxy-1,4-dioxo-1,2,3,4-tetrahydro-6H-pyrazino[1,2-*b*]isoquinoline-6-carboxylate (7b).** The residue was purified by flash column chromatography on silica gel with ethyl acetate/hexane (7:3) as eluent, to give compound **7b** (85%) as a brown oil. IR  $\nu_{\text{max}}$  (film): 2983, 2358 and  $1698\text{ cm}^{-1}$ ;  $^1\text{H}$  NMR (250 MHz,  $\text{CDCl}_3$ )  $\delta$ : 7.64 (s, 1H), 6.97 (d,  $J = 9.1$  Hz, 1H), 6.86 (d,  $J = 9.1$  Hz, 1H), 6.83 (s, 1H), 5.18 (sept,  $J = 6.2$  Hz, 1H), 4.88 (d,  $J = 17.2$  Hz, 1H), 4.21 (d,  $J = 17.2$  Hz, 1H), 3.89 (s, 3H), 3.86 (s, 3H), 3.68 (s, 3H), 1.33 (m, 6H);  $^{13}\text{C}$  NMR (63 MHz,  $\text{CDCl}_3$ )  $\delta$ : 168.4, 162.3, 158.7, 152.3, 150.2, 150.0, 126.2, 119.2, 117.8, 114.7, 113.7, 111.3, 72.5, 56.3, 56.0, 53.2, 49.6, 47.4, 21.7. Anal. calcd. for  $\text{C}_{20}\text{H}_{22}\text{N}_2\text{O}_8$ : C, 57.41; H, 5.30; N, 6.70. Found: C, 57.23; H, 5.11; N, 6.55.

**2-Isopropoxycarbonyl-7,10-dimethoxy-6-naphthycarbonyloxymethyl-2,3-dihydro-6H-pyrazino[1,2-*b*]isoquinoline-1,4-dione (7d).** IR  $\nu_{\text{max}}$  (film): 2360, 1717,  $1489\text{ cm}^{-1}$ ;  $^1\text{H}$  NMR (250 MHz,  $\text{CDCl}_3$ )  $\delta$ : 8.88 (d,  $J = 8.4$  Hz, 1H), 8.15 (d,  $J = 7.2$ , 1H), 8.04 (d,  $J = 8.0$  Hz, 1H), 7.89 (d,  $J = 7.4$ , 1H), 7.69 (s, 1H), 7.57 (m, 3H), 6.93 (d,  $J = 8.9$ , 1H), 6.84 (d,  $J = 8.9$ , 1H), 6.65 (dd,  $J = 7.8$  and  $3.5$  Hz, 1H), 5.10 (sept,  $J = 6.2$  Hz, 1H), 4.76 (d,  $J = 17.3$  Hz, 1H), 4.58 (dd,  $J = 11.4$  and  $7.8$  Hz, 1H), 4.41 (dd,  $J = 11.4$  and  $3.5$  Hz, 1H), 4.16 (d,  $J = 17.3$  Hz, 1H), 3.88 (s, 3H), 3.85 (s, 3H), 1.33 (m, 6H);  $^{13}\text{C}$  NMR (63 MHz,  $\text{CDCl}_3$ )  $\delta$ : 166.9, 162.8, 158.9, 151.6, 150.2, 149.3, 133.7, 133.6,

133.5, 131.4, 130.8, 128.4, 127.7, 126.1, 125.8, 125.7, 124.6, 119.7, 119.0, 114.5, 112.9, 111.0, 72.3, 63.6, 56.0, 55.8, 47.6, 47.5, 21.6. HRMS (negative ESI), m/z: Calcd for C<sub>30</sub>H<sub>28</sub>N<sub>2</sub>O<sub>8</sub>: 544.18457 (M<sup>+</sup>). Found: 543.17958 (M<sup>+</sup> - 1). Anal. calcd. for C<sub>30</sub>H<sub>28</sub>N<sub>2</sub>O<sub>8</sub>: C, 66.17; H, 5.18; N, 5.14. Found: C, 66.50; H, 5.46; N, 5.24.

**(1*R*\*,6*S*\*)1-Hydroxy-2-isopropoxycarbonyl-7,10-dimethoxy-6-methyl-1,2,3,6-tetrahydropyrazino[1,2-*b*]isoquinolin-4-one (8a).**

Compound **8a** was unstable by flash column chromatography on silica gel, and was purified by precipitation from a mixture of hexane/ethyl acetate (1:1) to yield **8a** (98%) as a pale yellow solid. Mp 94-95 °C; IR  $\nu_{\text{max}}$  (film): 3351, 2980, 1713 and 1682 cm<sup>-1</sup>; <sup>1</sup>H NMR (250 MHz, CDCl<sub>3</sub>)  $\delta$ : 6.72 (s, 2H), 6.39 (s, 1H), 6.22 (ws, 1H), 6.07 (q, *J* = 6.5 Hz, 1H), 4.96 (sept, *J* = 6.1 Hz, 1H), 4.42 (d, *J* = 18.3 Hz, 1H), 4.08 (d, *J* = 18.3 Hz, 1H), 3.97 (s, 6H), 1.30 (m, 3H), 1.30 (d, *J* = 6.1 Hz, 6H); <sup>13</sup>C NMR (63 MHz, CDCl<sub>3</sub>)  $\delta$ : 171.2, 162.7, 148.7, 128.4, 123.8, 118.9, 110.2, 109.5, 70.3, 55.8, 55.6, 44.9, 44.3, 22.0. Anal. calcd. for C<sub>19</sub>H<sub>24</sub>N<sub>2</sub>O<sub>6</sub>: C, 60.63; H, 6.43; N, 7.44. Found: C, 60.57; H, 6.36; N, 7.28.

**Methyl 1-hydroxy-2-isopropoxycarbonyl-7,10-dimethoxy-4-oxo-1,2,3,6-tetrahydro-1*H*-pyrazino[1,2-*b*]isoquinoline-6-carboxylate (8b).**

Compound **8b** was unstable and could not be purified. It was stored at -5 °C and this crude product was used for the synthesis of compounds **17,18** and **25** (see below).

**1-Hydroxy-2-isopropoxycarbonyl-7,10-dimethoxy-6-naphtycarbonyloxymethyl-1,2,3,6-tetrahydropyrazino[1,2-*b*]isoquinolin-4-one (8d).**

Compound **8d** was unstable and could not be purified. It was stored at -5 °C and this crude product was used for the synthesis of

compounds **19** and **20** (see below).

**7,10-Dimethoxy-6-methyl-3,6-dihydropyrazino[1,2-*b*]isoquinolin-4-one (9)**

A solution of compound **8a** (100 mg, 0.26 mmol) in 5 mL of a mixture of TFA/H<sub>2</sub>SO<sub>4</sub> (20:1) was stirred at room temperature for 16 h. Then the mixture was dropped over a saturated aqueous solution of NaHCO<sub>3</sub>. The aqueous residue was extracted with dichloromethane (20 mL x 3) and the organic extracts were washed with H<sub>2</sub>O and with a saturated aqueous solution of NaCl, dried over anhydrous Na<sub>2</sub>SO<sub>4</sub>, filtered, and concentrated in vacuo to give the unstable imine **9** (60 mg, 85%) as a brown oil. <sup>1</sup>H NMR (250 MHz, CDCl<sub>3</sub>) δ: 7.99 (bs, 1H), 6.80 (d, *J* = 8.9 Hz, 1H), 6.74 (d, *J* = 8.9 Hz, 1H), 6.48 (s, 1H), 6.10 (q, *J* = 6.5 Hz, 1H), 4.69 (d, *J* = 23.2 Hz, 1H), 4.40 (d, *J* = 23.2 Hz, 1H), 3.85 (s, 3H), 3.82 (s, 3H), 1.28 (d, *J* = 6.5 Hz, 3H); <sup>13</sup>C NMR (63 MHz, CDCl<sub>3</sub>) δ: 164.8, 155.6, 149.6, 149.3, 127.9, 124.8, 119.2, 112.2, 110.0, 108.6, 56.3, 56.2, 56.1, 44.5, 19.7.

**7,10-Dimethoxy-2,6-dimethyl-4-oxo-3,4-dihydro-6*H*-pyrazino[1,2-*b*]isoquinolinium iodide (10).** To a solution of unpurified compound **9** in anhydrous methanol (5 mL), methyl iodide (0.03 mL, 0.44 mmol) was added and the mixture was stirred at reflux for 2 h. Then the solvent was removed in vacuo to give **10** (50 mg, 94%) as a green oil. IR ν<sub>max</sub> (film): 2933, 1575, 1489 and 1261 cm<sup>-1</sup>; <sup>1</sup>H NMR (250 MHz, CDCl<sub>3</sub>) δ: 8.06 (s, 1H), 7.40 (s, 1H), 6.82 (d, *J* = 10.5 Hz, 1H), 6.77 (d, *J* = 10.5 Hz, 1H), 6.35 (q, *J* = 6.7 Hz, 1H), 4.33 (d, *J* = 19.2 Hz, 1H), 3.89 (s, 3H), 3.86 (s, 3H), 3.63 (d, *J* = 19.2 Hz, 1H), 1.50 (d, *J* = 6.7 Hz, 3H), 1.32 (s, 3H); <sup>13</sup>C NMR (63 MHz, CDCl<sub>3</sub>) δ: 156.1, 149.7, 149.1, 145.6, 136.8, 126.2, 122.4, 120.0, 109.5, 108.9, 55.8, 55.7, 46.6, 32.1, 24.1, 18.5. Anal. Calcd for C<sub>16</sub>H<sub>19</sub>IN<sub>2</sub>O<sub>3</sub>: C, 46.39; H, 4.62; N, 6.76. Found: C, 46.23; H, 4.26; N, 6.45.

**General procedure for the 1,3-DPC reactions with hemiaminals 8.**

Compounds **8a** or **8b** (0.26 mmol) were dissolved in toluene (5 mL) and the corresponding dipolarophile (alkene or alkyne) (5eq) was added. The reaction was carried out in a closed tube or, alternatively, refluxed for 48 h at 120 °C or under microwave heating at 140 °C for 2 h. Then the solvent was removed in vacuo and the residue was purified by column chromatography on silica gel.

### Synthesis of compounds **12** and **13**.

The reaction of compound **8a** (100 mg, 0.26 mmol) and acrylonitrile (0.037 mL, 1.3 mmol) as described earlier, gave a mixture that was purified by column chromatography on silica gel with hexane/ethyl acetate (8:2) as eluent to give compounds **12** (42%) and **13** (18%) as brown oils.

**(1S\*,3R\*,12S\*,6S\*) 13-Isopropoxycarbonyl-7,10-dimethoxy-6-methyl-1,2,3,4,6,12-hexahydro-3,12-iminoazepino[1,2-*b*]isoquinoline-1-carbonitrile (12).** IR  $\nu_{\text{max}}$  (film): 3369, 2981, 1713 and 1692  $\text{cm}^{-1}$ ;  $^1\text{H}$  NMR (250 MHz,  $\text{CDCl}_3$ )  $\delta$ : 6.72 (s, 2H), 6.21 (s, 1H), 5.98 (q,  $J$  = 6.4 Hz, 1H), 5.23 (s, 1H), 5.00 (sept,  $J$  = 6.1 Hz, 1H), 4.81 (d,  $J$  = 5.0 Hz, 1H), 3.83 (s, 3H), 3.80 (s, 3H), 3.09 (dd,  $J$  = 9.2 and 4.0, 1H), 2.59 (m, 1H), 2.43 (m, 1H), 1.29 (d,  $J$  = 6.1 Hz, 6H), 1.17 (d,  $J$  = 6.4 Hz, 3H);  $^{13}\text{C}$  NMR (63 MHz,  $\text{CDCl}_3$ )  $\delta$ : 167.6, 154.2, 148.8, 148.1, 132.4, 122.6, 120.1, 119.0, 109.9, 109.6, 100.4, 70.6, 61.2, 59.4, 55.9, 55.6, 44.5, 35.3, 34.0, 21.9, 19.1. HRMS (negative ESI),  $m/z$ : Calcd for  $\text{C}_{22}\text{H}_{25}\text{N}_3\text{O}_5$ : 411.17942 ( $\text{M}^+$ ). Found: 410.17214 ( $\text{M}^+ - 1$ ). Anal. Calcd for  $\text{C}_{22}\text{H}_{25}\text{N}_3\text{O}_5$ : C, 64.22; H, 6.12; N, 10.21. Found: C, 64.18; H, 6.06; N, 10.15.

**(1S\*,3S\*,12R\*,6S\*)-13-Isopropoxycarbonyl-7,10-dimethoxy-6-methyl-1,2,3,4,6,12-hexahydro-3,12-iminoazepino[1,2-*b*]isoquinoline-1-carbonitrile (13).** IR  $\nu_{\text{max}}$  (film): 3279, 1713 and 1489  $\text{cm}^{-1}$ ;  $^1\text{H}$  NMR (250 MHz,  $\text{CDCl}_3$ )  $\delta$ : 6.72 (s, 2H), 6.25 (s, 1H), 5.88 (q,  $J$  = 6.3 Hz, 1H), 5.19 (s, 1H), 4.95 (sept,  $J$  = 6.3 Hz, 1H), 4.84 (d,  $J$  = 2.0, 1H), 3.82 (s, 3H), 3.81 (s, 3H), 3.20 (t,  $J$  = 8.2 Hz, 1H), 2.63 (m, 2H),

1.28 (m, 6H), 1.23 (d,  $J = 6.3$  Hz, 3H);  $^{13}\text{C}$  NMR (125 MHz,  $\text{CDCl}_3$ )  $\delta$ : 165.3, 148.8, 148.5, 130.8, 122.6, 119.9, 118.4, 110.2, 109.7, 100.8, 77.1, 70.5, 59.9, 55.9, 55.6, 44.2, 37.1, 32.5, 21.9, 18.5. HRMS (negative ESI),  $m/z$ : Calcd for  $\text{C}_{22}\text{H}_{25}\text{N}_3\text{O}_5$ : 411.17942 ( $\text{M}^+$ ). Found: 410.17214 ( $\text{M}^+ - 1$ ). Anal. Calcd for  $\text{C}_{22}\text{H}_{25}\text{N}_3\text{O}_5$ : C, 64.22; H, 6.12; N, 10.21. Found: C, 64.02; H, 5.87; N, 9.96.

### Synthesis of compounds **14** and **15**.

The reaction of compound **8a** (100 mg, 0.26 mmol) and acrolein (1.3 mmol, 0.1 mL), as described earlier, gave a mixture which was purified by column chromatography on silica gel eluting with petroleum ether/ethyl acetate (7:3) to give compounds **14** (32%) as a yellow solid and **15** (22%) as a brown oil.

**(1*S*\*,3*R*\*,12*S*\*,6*S*\*)-13-isopropoxycarbonyl-7,10-dimethoxy-6-methyl-1,2,3,4,6,12-hexahydro-3,12-iminoazepino[1,2-*b*]isoquinoline-1-carbaldehyde (**14**)**. Mp 100-101 °C; IR  $\nu_{\text{max}}$  (film): 2933, 1694 and 1488  $\text{cm}^{-1}$ ;  $^1\text{H}$  NMR (250 MHz,  $\text{CDCl}_3$ )  $\delta$ : 9.78 (s, 1H), 6.71 (s, 2H), 6.22 (s, 1H), 6.04 (q,  $J = 6.4$  Hz, 1H), 5.29 (s, 1H), 4.93 (sept,  $J = 6.3$  Hz, 1H), 4.73 (d,  $J = 18.5$  Hz, 1H), 3.84 (s, 3H), 3.81 (s, 3H), 2.97 (dd,  $J = 9.6$  and 4.3 Hz, 1H), 2.69 (m, 1H), 2.23 (m, 1H), 1.27 (d,  $J = 6.3$  Hz, 6H), 1.20 (d,  $J = 6.4$  Hz, 3H);  $^{13}\text{C}$  NMR (63 MHz,  $\text{CDCl}_3$ )  $\delta$ : 198.2, 168.7, 154.6, 149.0, 148.0, 127.8, 122.7, 119.6, 118.7, 109.6, 109.4, 70.2, 60.0, 57.7, 55.9, 55.6, 44.5, 28.4, 21.9, 19.2. HRMS (negative ESI),  $m/z$ : Calcd for  $\text{C}_{22}\text{H}_{26}\text{N}_2\text{O}_6$ : 414.17909 ( $\text{M}^+$ ). Found: 413.17181 ( $\text{M}^+ - 1$ ). Anal. Calcd for  $\text{C}_{22}\text{H}_{26}\text{N}_2\text{O}_6$ : C, 63.76; H, 6.32; N, 6.76. Found: C, 63.54; H, 6.26; N, 6.45.

**(1*S*\*,3*S*\*,12*R*\*,6*S*\*)-13-Isopropoxycarbonyl-7,10-dimethoxy-6-methyl-1,2,3,4,6,12-hexahydro-3,12-iminoazepino[1,2-*b*]isoquinoline-1-carbaldehyde (**15**)**. IR  $\nu_{\text{max}}$  (film): 3448, 2936, 1684 and 1488  $\text{cm}^{-1}$ ;  $^1\text{H}$  NMR (250 MHz,  $\text{CDCl}_3$ )  $\delta$ : 9.78 (s, 1H), 6.69 (s, 2H), 6.22 (s, 1H), 5.92 (q,  $J = 6.3$  Hz, 1H), 5.18 (bs, 1H), 4.89 (sept,  $J = 6.3$  Hz, 1H), 4.81 (d,  $J = 14.0$ , 1H), 3.82 (s, 3H), 3.81 (s, 3H), 3.16 (m, 1H),



2.70 (m, 1H), 2.38 (m, 1H), 1.25 (m, 9H);  $^{13}\text{C}$  NMR (63 MHz,  $\text{CDCl}_3$ )  $\delta$ : 197.8, 166.5, 148.8, 148.4, 132.5, 122.6, 118.9, 109.8, 109.6, 99.5, 69.9, 60.3, 57.7, 56.0, 55.6, 54.4, 44.1, 29.7, 21.9, 18.4. HRMS (negative ESI),  $m/z$ : Calcd for  $\text{C}_{22}\text{H}_{26}\text{N}_2\text{O}_6$ : 414.17909 ( $\text{M}^+$ ). Found: 413.17181 ( $\text{M}^+ - 1$ ). Anal. Calcd for  $\text{C}_{22}\text{H}_{26}\text{N}_2\text{O}_6$ : C, 63.76; H, 6.32; N, 6.76. Found: C, 63.27; H, 6.05; N, 6.33.

**(1*S*\*,2*S*\*,3*R*\*,6*S*\*,12*S*\*) Ethyl 13-isopropoxycarbonyl-7,10-dimethoxy-2,6-dimethyl-4-oxo-1,2,3,4,6,12-hexahydro-3,12-iminoazepino[1,2-*b*]isoquinoline-1-carboxylate (16).**

The reaction of compound **8a** (100 mg, 0.26 mmol) and ethyl crotonate (0.15 mL, 1.3 mmol), as described earlier, gave a crude product which was purified by column chromatography on silica gel with dichloromethane as eluent to give compound **16** as a brown solid (72 mg, 70%). Mp 60-61 °C; IR  $\nu_{\text{max}}$  (film): 3056, 1628 and 1591  $\text{cm}^{-1}$ ;  $^1\text{H}$  NMR (250 MHz,  $\text{CDCl}_3$ )  $\delta$ : 6.72 (d,  $J = 8.9$  Hz, 1H), 6.68 (d,  $J = 8.9$  Hz, 1H), 6.13 (s, 1H), 6.07 (q,  $J = 6.5$  Hz, 1H), 5.13 (s, 1H), 4.92 (sept,  $J = 6.6$  Hz, 1H), 4.64 (d,  $J = 6.4$  Hz, 1H), 4.24 (dd,  $J = 11.1$  and 7.1 Hz, 2H), 3.83 (s, 3H), 3.81 (s, 3H), 2.88 (m, 1H), 2.48 (d,  $J = 5.7$  Hz, 1H), 1.35-1.36 (m, 15H);  $^{13}\text{C}$  NMR (63 MHz,  $\text{CDCl}_3$ )  $\delta$ : 172.1, 167.3, 154.5, 148.9, 147.9, 135.2, 122.7, 119.8, 109.4, 109.1, 69.8, 65.2, 61.4, 59.7, 56.0, 55.9, 44.5, 40.3, 21.9, 19.2, 15.9, 14.5. HRMS (negative ESI),  $m/z$ : Calcd for  $\text{C}_{25}\text{H}_{32}\text{N}_2\text{O}_7$ : 472.22095 ( $\text{M}^+$ ). Found: 471.21367 ( $\text{M}^+ - 1$ ). Anal. Calcd for  $\text{C}_{25}\text{H}_{32}\text{N}_2\text{O}_7$ : C, 63.54; H, 6.83; N, 5.93. Found: C, 63.21; H, 6.55; N, 5.72.

**Synthesis of compounds 17 and 18**

The reaction of compound **8b** (100 mg, 0.26 mmol) and *tert*-butyl acrylate (0.1 mL, 1.3 mmol) as described earlier, gave a mixture which was purified by column chromatography on silica gel eluting with hexane/dichloromethane (8/2) to give compounds **17** (52 mg, 20%) and **18** (54 mg, 23%) as yellow oils.

**(1*S*\*,3*S*\*,6*R*\*,12*R*\*)-13-Isopropoxycarbonyl-7,10-dimethoxy-4-oxo-1,2,3,4,6,12-hexahydro-3,12-iminoazepino[1,2-*b*]isoquinoline-1-**

**carboxylic acid *tert*-butyl ester 6-carboxylic acid methyl ester (17).** IR  $\nu_{\max}$  (film): 3438, 2094, 1649 and 1491  $\text{cm}^{-1}$ ;  $^1\text{H}$  NMR (250 MHz,  $\text{CDCl}_3$ )  $\delta$ : 6.77 (s, 2H), 6.55 (s, 1H), 6.11 (s, 0.7H), 6.05 (s, 0.3H), 5.17 (s, 0.7H), 5.09 (s, 0.3H), 4.88 (m, 1H), 4.86 (m, 1H), 3.85 (s, 3H), 3.81 (s, 3H), 3.65 (s, 3H), 3.44 (m, 1H), 2.53 (m, 2H), 1.49 (s, 9H), 1.22 (m, 6H);  $^{13}\text{C}$  NMR (63 MHz,  $\text{CDCl}_3$ )  $\delta$ : 171.7, 169.9, 167.8, 166.6, 150.4, 148.2, 135.0, 120.4, 115.2, 111.0, 110.4, 99.0, 81.6, 69.5, 60.5, 60.3, 56.2, 56.0, 52.8, 49.4, 47.9, 34.6, 28.0, 21.9. HRMS (negative ESI),  $m/z$ : Calcd for  $\text{C}_{27}\text{H}_{34}\text{N}_2\text{O}_9$ : 530.22643 ( $\text{M}^+$ ). Found: 529.21601 ( $\text{M}^+ - 1$ ). Anal. Calcd for  $\text{C}_{27}\text{H}_{34}\text{N}_2\text{O}_9$ : C, 61.12; H, 6.46; N, 5.28. Found: C, 60.86; H, 6.11; N, 5.03.

**(1*S*\*,3*R*\*,6*R*\*,12*S*\*)-13-Isopropoxycarbonyl-7,10-dimethoxy-4-oxo-1,2,3,4,6,12-hexahydro-3,12-iminoazepino[1,2-*b*]isoquinoline-1-carboxylic acid *tert*-butyl ester 6-carboxylic acid methyl ester (18).** IR  $\nu_{\max}$  (film): 3433, 2979, 1702 and 1490  $\text{cm}^{-1}$ ;  $^1\text{H}$  NMR (250 MHz,  $\text{CDCl}_3$ )  $\delta$ : 6.64 (s, 2H), 6.52 (s, 1H), 6.02 (s, 1H), 5.18 (s, 1H), 4.91 (sept,  $J = 6.2$  Hz, 1H), 4.72 (m, 1H), 3.71 (s, 3H), 3.69 (s, 3H), 3.45 (s, 3H), 2.76 (dd,  $J = 9.4$  and  $5.0$  Hz, 1H), 2.48 (m, 1H), 2.01 (m, 2H), 1.36 (s, 9H), 1.14 (d,  $J = 6.2$  Hz, 6H);  $^{13}\text{C}$  NMR (63 MHz,  $\text{CDCl}_3$ )  $\delta$ : 171.0, 169.8, 168.9, 153.9, 150.5, 147.8, 136.4, 121.0, 115.7, 111.0, 110.1, 98.6, 81.9, 69.6, 60.0, 59.4, 56.2, 56.0, 51.0, 49.4, 47.2, 31.7, 27.9, 22.2. HRMS (negative ESI),  $m/z$ : Calcd for  $\text{C}_{27}\text{H}_{34}\text{N}_2\text{O}_9$ : 530.22643 ( $\text{M}^+$ ). Found: 529.21915 ( $\text{M}^+ - 1$ ). Anal. Calcd for  $\text{C}_{27}\text{H}_{34}\text{N}_2\text{O}_9$ : C, 61.12; H, 6.46; N, 5.28. Found: C, 60.77; H, 6.21; N, 5.10.

### Synthesis of compounds 19 and 20

The reaction of compound **8d** (100 mg, 0.26 mmol) and *tert*-butyl acrylate (0.1 mL, 1.3 mmol) as described earlier, gave a mixture which was purified by column chromatography on silica gel eluting with hexane/dichloromethane (8/2) to give an inseparable mixture containing **19** and **20** (55%) as a yellow oil.

**(1*S*\*,3*S*\*,6*R*\*,12*R*\*) and (1*R*\*,3*R*\*,6*R*\*,12*R*\*) *tert*-Butyl 13-isopropoxycarbonyl-7,10-dimethoxy-6-naphtycarbonyloxymethyl-4-oxo-1,2,3,4,6,12-hexahydro-3,12-iminoazepino[1,2-*b*]isoquinoline-1-carboxylate (19 and 20).**

IR  $\nu_{\max}$  (film): 2978, 1713, 1593  $\text{cm}^{-1}$ ;  $^1\text{H}$  NMR (250 MHz,  $\text{CDCl}_3$ )  $\delta$ : 8.89 (m, 1.3H), 8.18 (m, 1.3H), 8.02 (m, 1.3H), 7.85 (m, 1.3H), 7.54 (m, 3.9H), 6.75 (m, 2.6H), 6.50 (m, 1H), 6.39 (m, 0.3H), 6.18 (m, 1.3H), 5.32 (s, 1.3H), 4.88 (m, 1.3H), 4.66 (sept,  $J = 6.2$  Hz, 1.3H), 4.35 (dd,  $J = 10.9$  and  $3.7$  Hz, 1.3H), 4.55 (m, 1.3H), 3.82 (m, 8H), 3.03 (m, 0.3H), 2.94 (q,  $J = 12.5$  Hz, 1H), 2.58 (m, 1H), 2.34 (m, 0.3H), 2.21 (m, 1.3H), 2.07 (m, 0.3H), 1.52-1.20 (m, 19 H).  $^{13}\text{C}$  NMR (63 MHz,  $\text{CDCl}_3$ )  $\delta$ : 171.3, 171.1, 167.5, 167.0, 166.9, 153.6, 149.6, 149.3, 148.5, 147.9, 135.9, 134.2, 133.7, 133.6, 133.3, 131.5, 131.3, 130.8, 128.4, 128.3, 127.8, 127.5, 126.0, 125.8, 124.7, 124.5, 121.3, 120.7, 117.0, 116.8, 110.7, 109.6, 109.2, 99.3, 97.7, 81.9, 81.5, 69.6, 69.5, 64.3, 60.7, 60.6, 59.9, 56.0, 55.6, 47.7, 47.1, 46.8, 31.9, 29.6, 27.9, 27.8, 21.9, 21.7. HRMS (negative ESI),  $m/z$ : Calcd for  $\text{C}_{37}\text{H}_{40}\text{N}_2\text{O}_9$ : 656.27338 ( $\text{M}^+$ ). Found: 701.27158 ( $\text{M}^+ - 1 + 2 \text{ Na}$ ). Anal. calcd. for  $\text{C}_{37}\text{H}_{40}\text{N}_2\text{O}_9$ : C, 67.67; H, 6.14; N, 4.27. Found: C, 67.20; H, 6.30; N, 4.11.

### Synthesis of compounds 21 and 22

The reaction of compound **8a** (100 mg, 0.26 mmol) and diethyl acetylenedicarboxylate (0.2 mL, 1.3 mmol), as described earlier, gave a mixture which was purified by column chromatography on silica gel eluting with hexane/dichloromethane (8:2) to give compounds **21** (56%) and **22** (14%) as brown oils.

**(3*R*\*,6*S*\*,12*S*\*) Diethyl 13-isopropoxycarbonyl-7,10-dimethoxy-6-methyl-4-oxo-3,4,6,12-tetrahydro-3,12-iminoazepino[1,2-*b*]isoquinoline-1,2-dicarboxylate (21).** IR  $\nu_{\max}$  (film): 2982, 1726, 1489 and 1370  $\text{cm}^{-1}$ ;  $^1\text{H}$  NMR (500 MHz,  $\text{CDCl}_3$ )  $\delta$ : 6.70 (s, 2H), 6.35 (s, 1H), 5.95 (q,  $J = 6.4$  Hz, 1H), 5.59 (s, 1H), 5.28 (s, 1H), 4.92 (sept,  $J = 6.2$  Hz, 1H), 4.34 (m, 4H), 3.82 (s, 3H), 3.80 (s, 3H), 1.34 (m,

6H), 1.24 (m, 6H), 1.10 (d,  $J = 6.4$  Hz, 3H);  $^{13}\text{C}$  NMR (125 MHz,  $\text{CDCl}_3$ )  $\delta$ : 161.4, 161.2, 148.8, 148.7, 142.5, 140.7, 137.4, 127.5, 123.9, 110.2, 109.5, 102.8, 70.3, 66.3, 63.7, 62.1, 61.8, 55.9, 55.7, 44.5, 22.0, 21.9, 17.3, 14.0. HRMS (negative ESI),  $m/z$ : Calcd for  $\text{C}_{27}\text{H}_{32}\text{N}_2\text{O}_9$ : 528.21078 ( $\text{M}^+$ ). Found: 551.19843 ( $\text{M}^+ + \text{Na}$ ). Anal. Calcd for  $\text{C}_{27}\text{H}_{32}\text{N}_2\text{O}_9$ : C, 61.35; H, 6.10; N, 5.30. Found: C, 61.03; H, 5.86; N, 5.03.

**(3*S*\*,6*S*\*,12*R*\*) Diethyl 13-isopropoxycarbonyl-7,10-dimethoxy-6-methyl-4-oxo-3,4,6,12-tetrahydro-3,12-iminoazepino[1,2-*b*]isoquinoline-1,2-dicarboxylate (22).** IR  $\nu_{\text{max}}$  (film): 2922, 1721, 1488 and 1373  $\text{cm}^{-1}$ ;  $^1\text{H}$  NMR (500 MHz,  $\text{CDCl}_3$ )  $\delta$ : 6.71 (s, 2H), 6.27 (s, 1H), 5.97 (q,  $J = 6.5$  Hz, 1H), 5.53 (s, 1H), 5.20 (s, 1H), 5.02 (sept,  $J = 6.2$  Hz, 1H), 4.33 (m, 4H), 3.80 (s, 6H), 1.42-1.23 (m, 15H);  $^{13}\text{C}$  NMR (63 MHz,  $\text{CDCl}_3$ )  $\delta$ : 161.5, 160.8, 160.3, 148.9, 148.5, 139.4, 138.8, 128.5, 123.8, 119.3, 110.2, 109.9, 101.6, 70.5, 66.8, 62.1, 61.8, 55.9, 55.7, 44.6, 21.9, 19.4, 14.0. HRMS (negative ESI),  $m/z$ : Calcd for  $\text{C}_{27}\text{H}_{32}\text{N}_2\text{O}_9$ : 528.21078 ( $\text{M}^+$ ). Found: 551.19825 ( $\text{M}^+ + \text{Na}$ ). Anal. Calcd for  $\text{C}_{27}\text{H}_{32}\text{N}_2\text{O}_9$ : C, 61.35; H, 6.10; N, 5.30. Found: C, 60.92; H, 5.73; N, 4.97.

**(3*R*\*,6*S*\*,12*S*\*) and (3*S*\*,6*S*\*,12*R*\*) Methyl 13-isopropoxycarbonyl-7,10-dimethoxy-6-methyl-4-oxo-3,4,6,12-tetrahydro-3,12-iminoazepino[1,2-*b*]isoquinoline-1-carboxylate (23 and 24).** The reaction of compound **8** (100 mg, 0.26 mmol) and methyl propiolate (0.1 mL, 1.3 mmol) as described earlier, gave a crude product which was purified by column chromatography on silica gel eluting with hexane/dichloromethane (8:2) to give an inseparable mixture containing **23** and **24**.  $^1\text{H}$  NMR (250 MHz,  $\text{CDCl}_3$ )  $\delta$ : 7.26 (d,  $J = 2.9$  Hz, 1H), 7.06 (d,  $J = 3.0$  Hz, 1H), 6.67 (s, 4H), 6.37 (s, 1H), 6.26 (s, 1H), 6.00 (q,  $J = 6.5$  Hz, 1H), 5.88 (q,  $J = 6.3$  Hz, 1H), 5.48 (m, 2H), 5.12 (d,  $J = 3.9$  Hz, 1H), 5.05 (m, 1H), 4.87 (sept,  $J = 6.3$  Hz, 1H), 4.92 (sept,  $J = 6.2$  Hz, 1H), 3.84 (s, 3H), 3.81 (s, 3H), 3.80 (s, 3H), 3.78 (s, 3H), 1.35-1.15 (m, 18H), 1.04 (d,  $J = 6.3$  Hz, 3H);  $^{13}\text{C}$  NMR (63 MHz,  $\text{CDCl}_3$ )  $\delta$ : 162.1, 161.5, 148.8, 148.7, 148.6, 148.4, 140.2, 138.9, 138.2, 128.4, 127.7, 123.7, 123.5, 119.4, 119.0, 109.9, 109.6, 109.4, 102.2, 70.2, 69.9, 66.0, 65.5, 60.9, 56.1, 55.9, 55.6, 55.5, 52.3, 52.1, 44.5, 44.3, 21.8, 20.7, 17.4, 17.2. HRMS (negative ESI),  $m/z$ : Calcd for  $\text{C}_{23}\text{H}_{26}\text{N}_2\text{O}_7$ : 442.17400 ( $\text{M}^+$ ). Found: 465.16322 ( $\text{M}^+ + \text{Na}$ ). Anal. Calcd

for C<sub>23</sub>H<sub>26</sub>N<sub>2</sub>O<sub>7</sub>: C, 62.43; H, 5.92; N, 6.33. Found: C, 62.99; H, 6.22; N, 5.93.

**(3*R*\*,6*R*\*,12*S*\*) Diethyl 13-isopropoxycarbonyl-7,10-dimethoxy-6-methoxycarbonyl-4-oxo-3,4,6,12-tetrahydro-3,12-iminoazepino[1,2-*b*]isoquinoline-1,2-dicarboxylate (25)**

The reaction of compound **8b** (100 mg, 0.26 mmol) and diethyl acetylenedicarboxylate (0.2 mL, 1.3 mmol), as described earlier, gave a mixture which was purified by column chromatography on silica gel eluting with hexane/dichloromethane (7:3) to give compound **25** (23%) as a brown oil. IR  $\nu_{\text{max}}$  (film): 3424, 1698 and 1490 cm<sup>-1</sup>; <sup>1</sup>H NMR (250 MHz, CDCl<sub>3</sub>)  $\delta$  6.78 (s, 2H), 6.61 (s, 1H), 6.30 (s, 1H), 5.62 (bs, 1H), 5.29 (s, 1H), 5.11 (sept, *J* = 6.2 Hz, 1H), 4.27 (m, 4H), 4.21 (s, 3H), 4.16 (s, 3H), 3.62 (s, 3H), 1.33 (m, 6H), 1.32 (m, 6H); <sup>13</sup>C NMR (63 MHz, CDCl<sub>3</sub>)  $\delta$  168.9, 161.5, 160.8, 160.3, 153.1, 151.1, 148.5, 144.8, 139.4, 129.8, 117.1, 116.6, 111.1, 110.7, 101.7, 67.4, 62.5, 62.2, 61.8, 56.3, 56.0, 52.7, 49.4, 27.2, 21.9, 13.9, 13.7. HRMS (negative ESI), *m/z*: Calcd for C<sub>28</sub>H<sub>32</sub>N<sub>2</sub>O<sub>11</sub>: 572.20061 (*M*<sup>+</sup>). Found: 595.18983 (*M*<sup>+</sup> + Na). Anal. Calcd for C<sub>28</sub>H<sub>32</sub>N<sub>2</sub>O<sub>11</sub>: C, 58.74; H, 5.63; N, 4.89. Found: C, 58.45; H, 5.34; N, 4.43.

Compound 1b

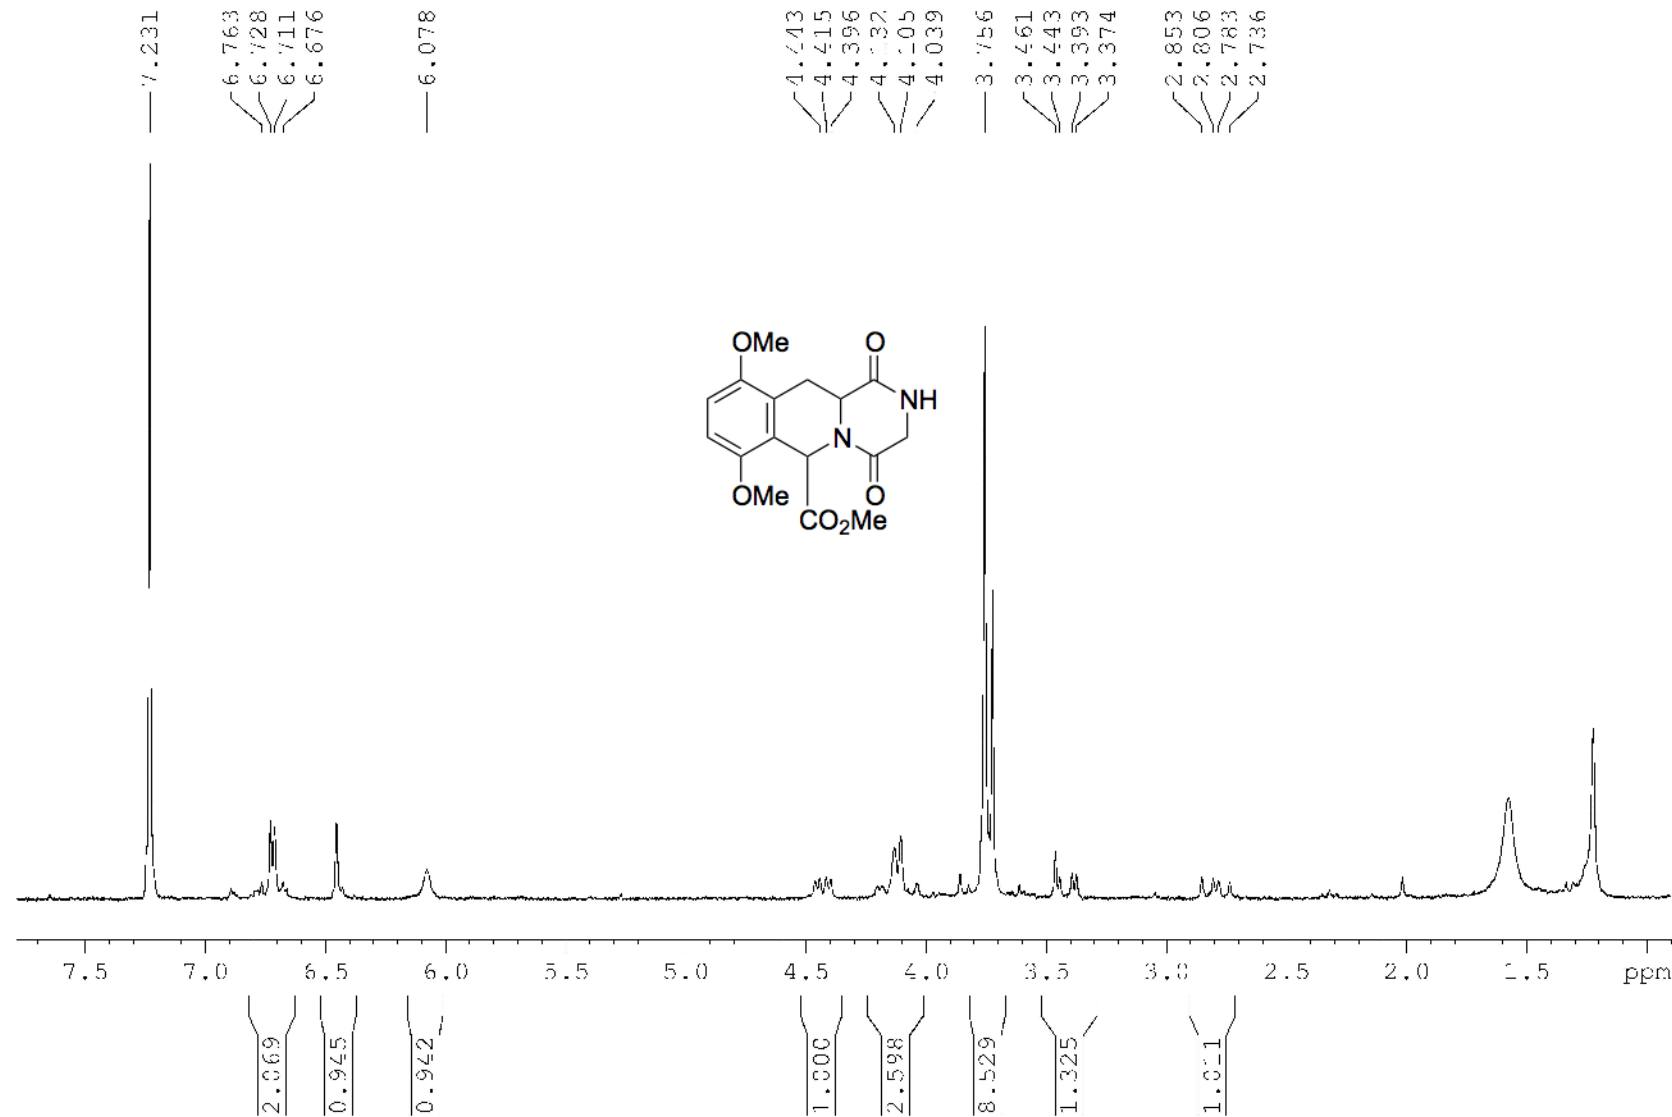

Compound 1b

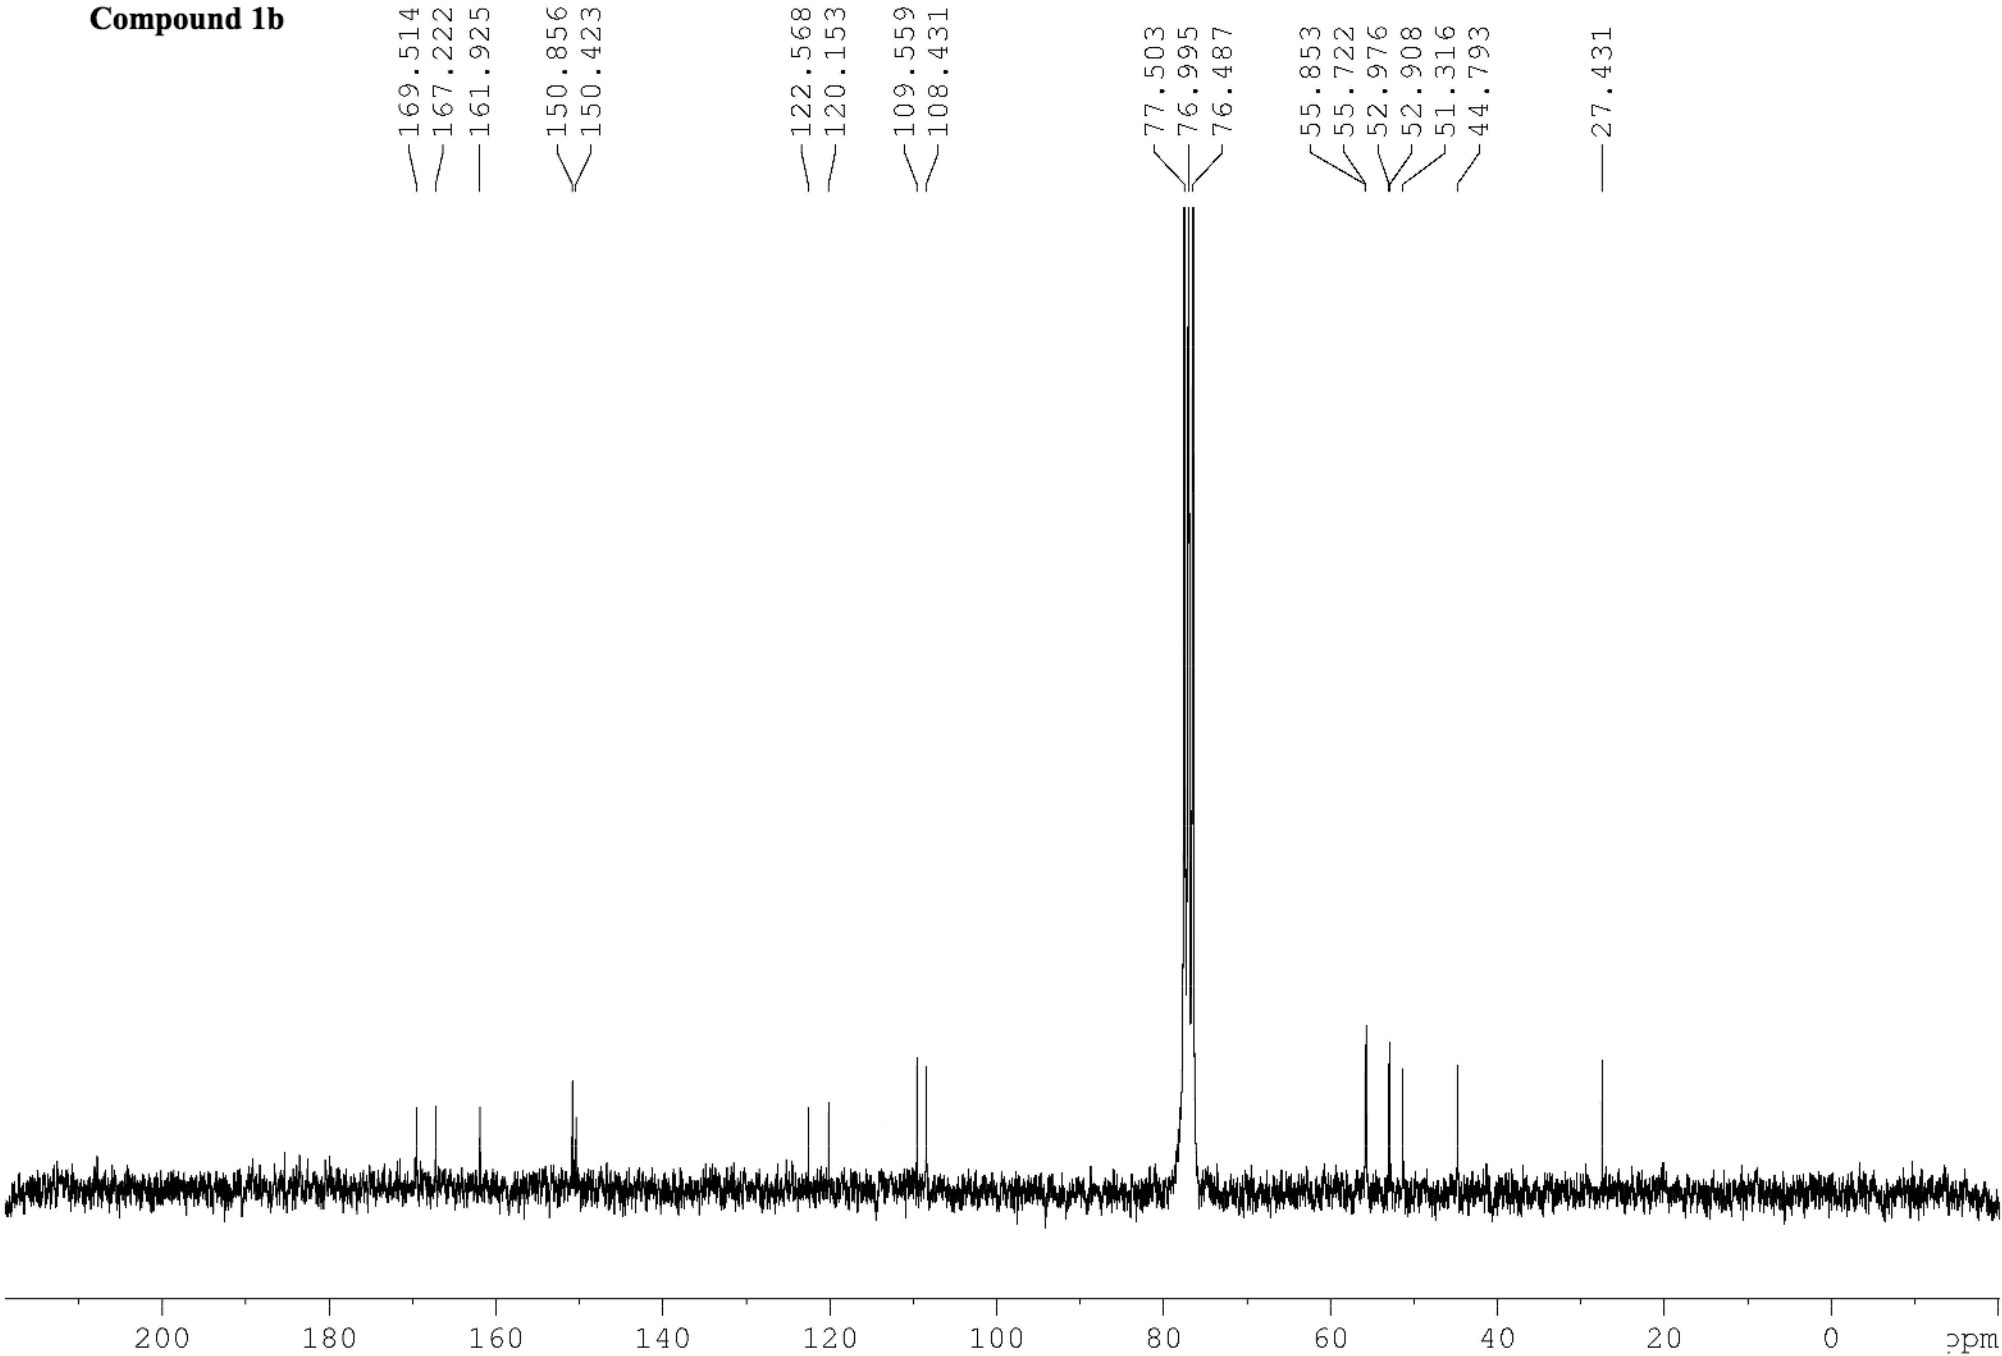

**Compound 1b**  
**HRMS**

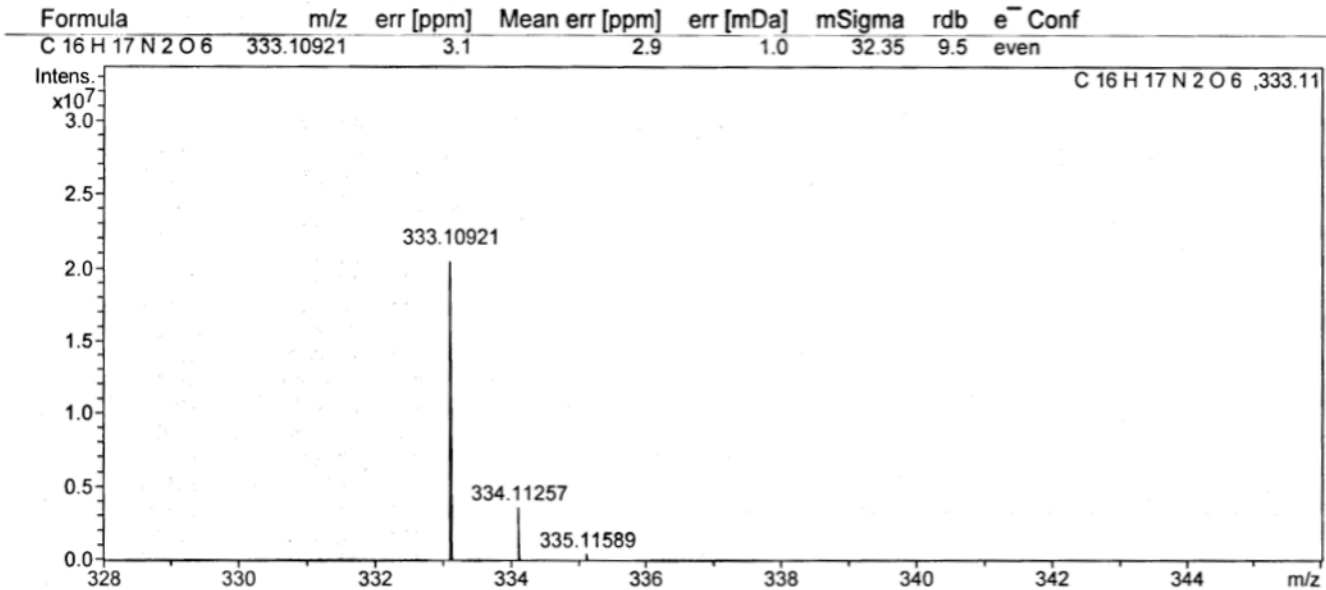



**Compound 1c**

20

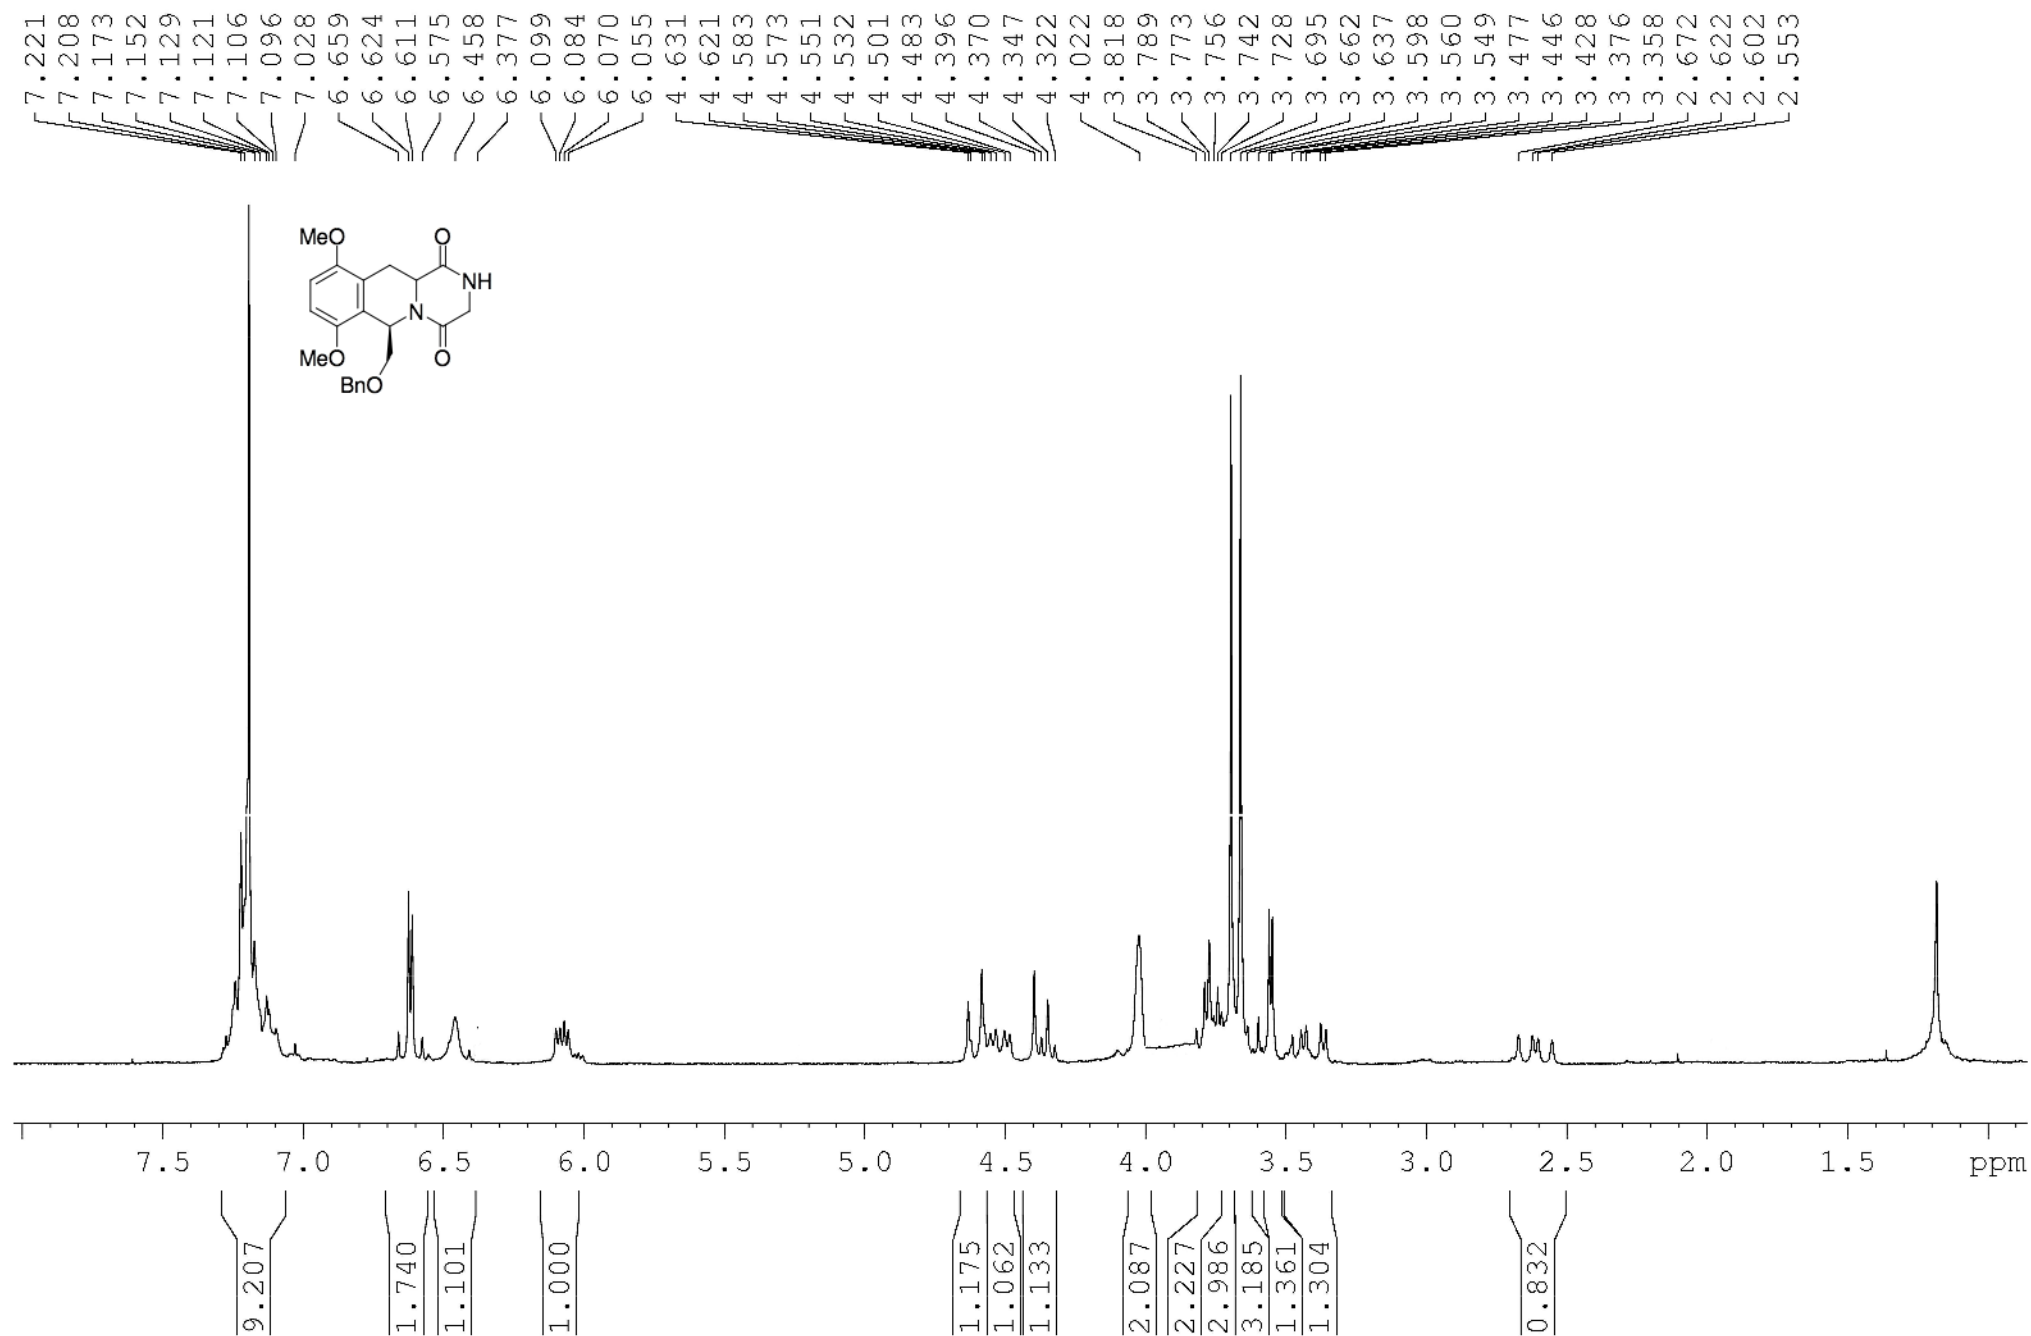

Compound 1c

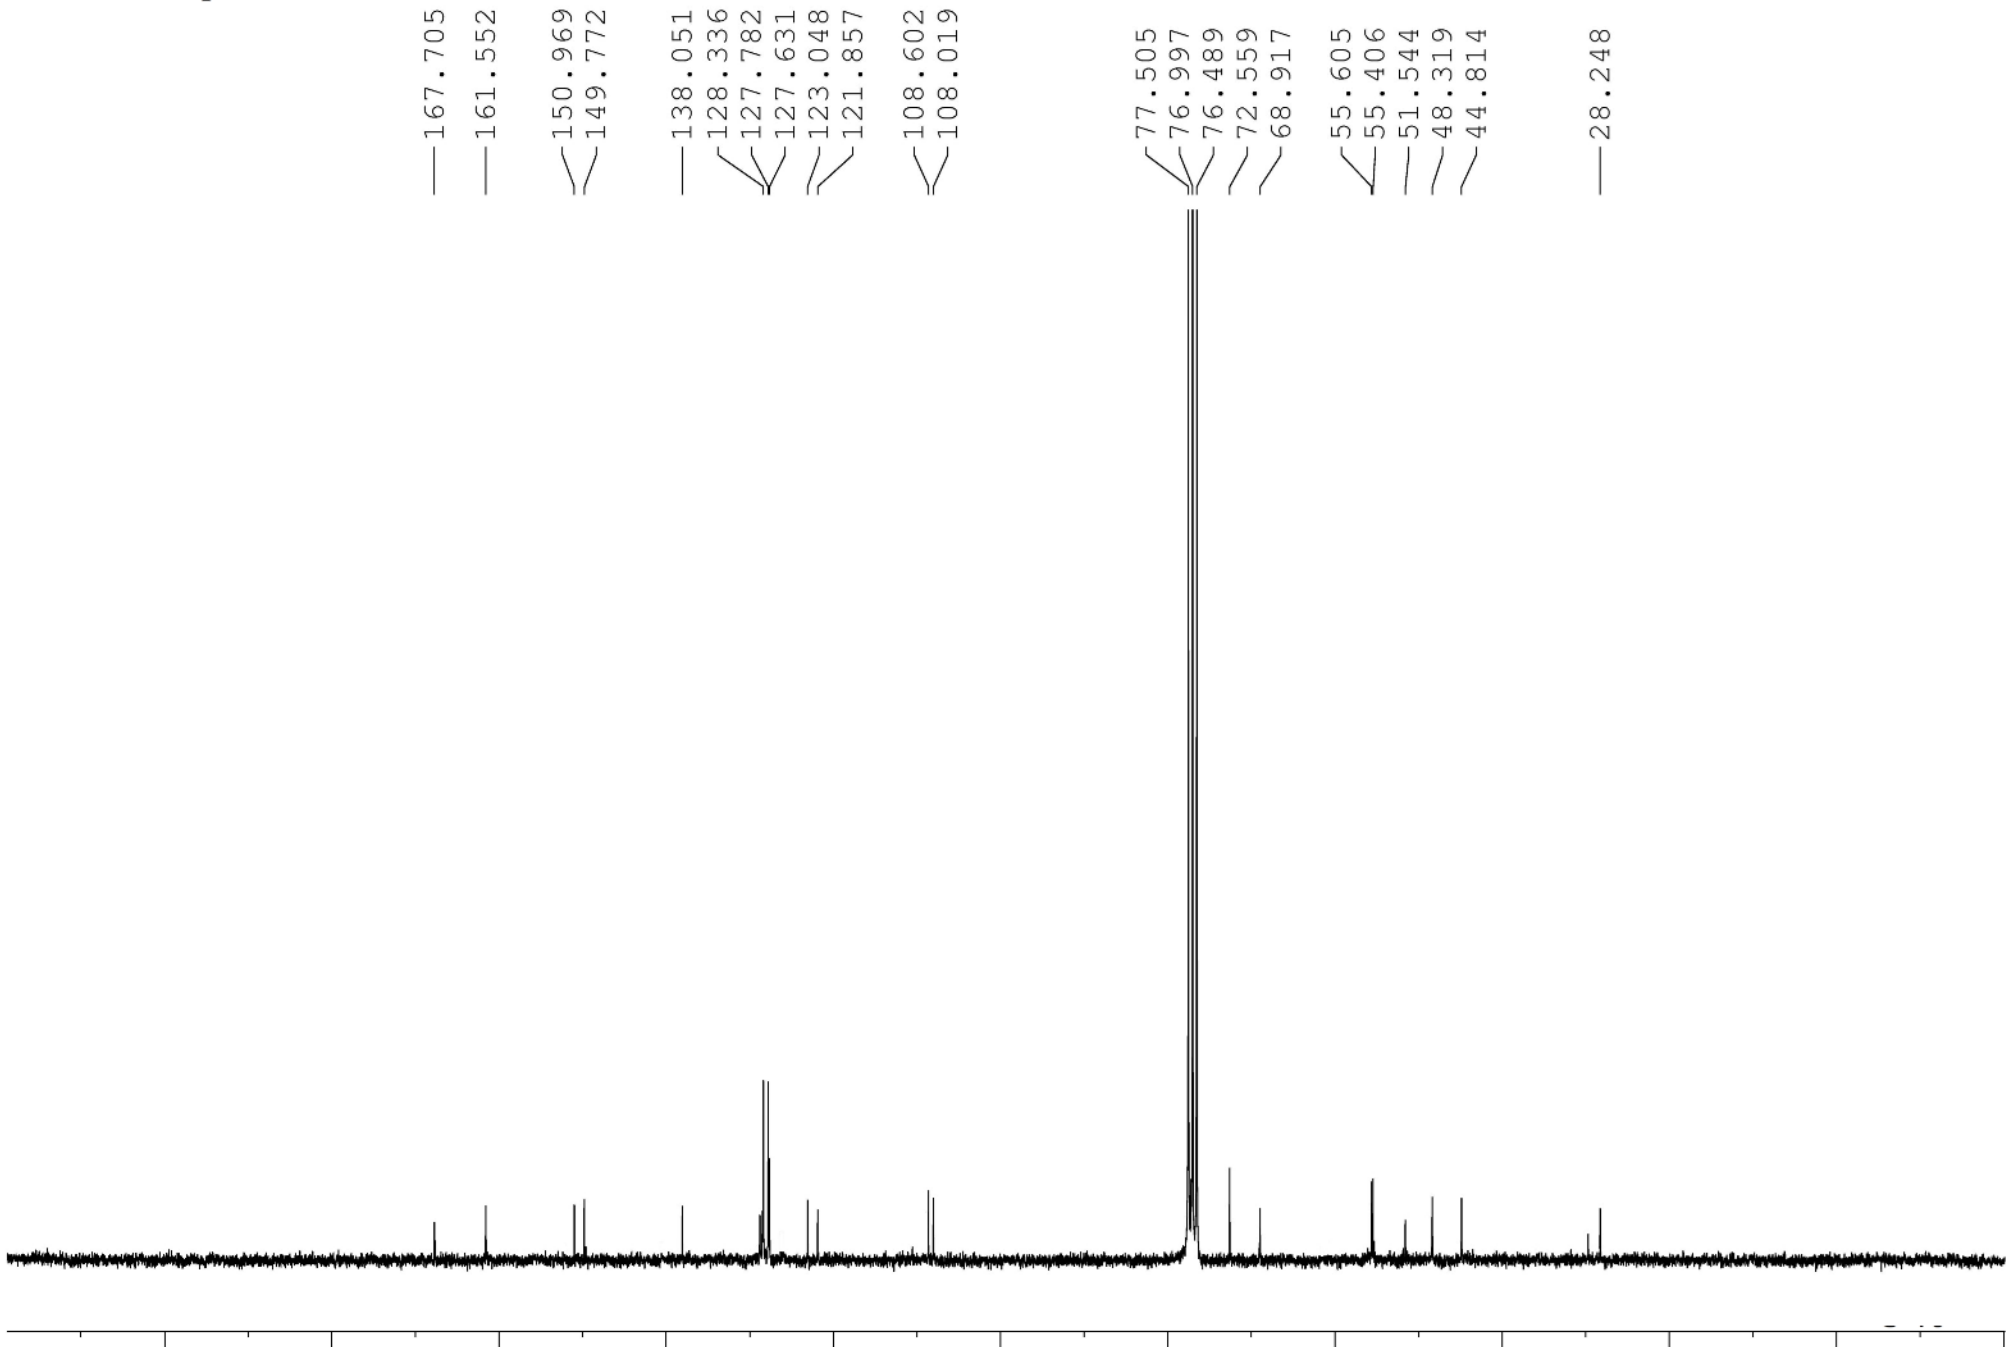

Compound 1c

HRMS

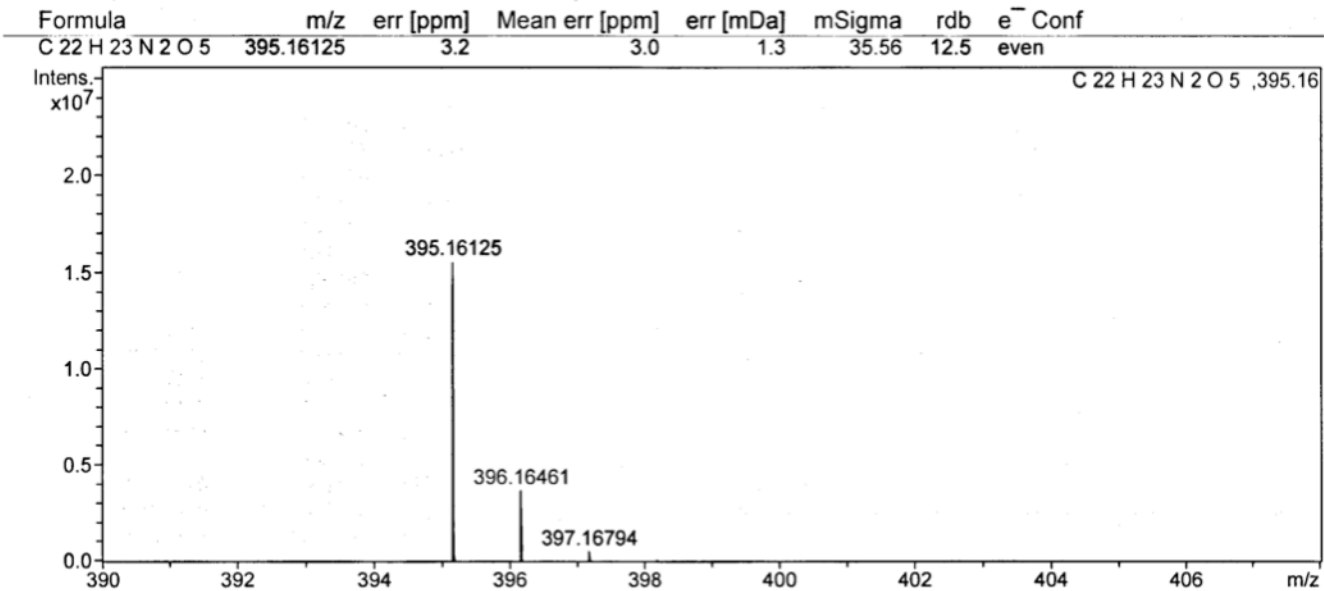

### Compound 2b

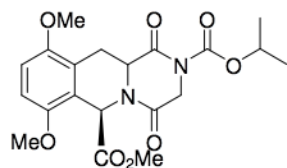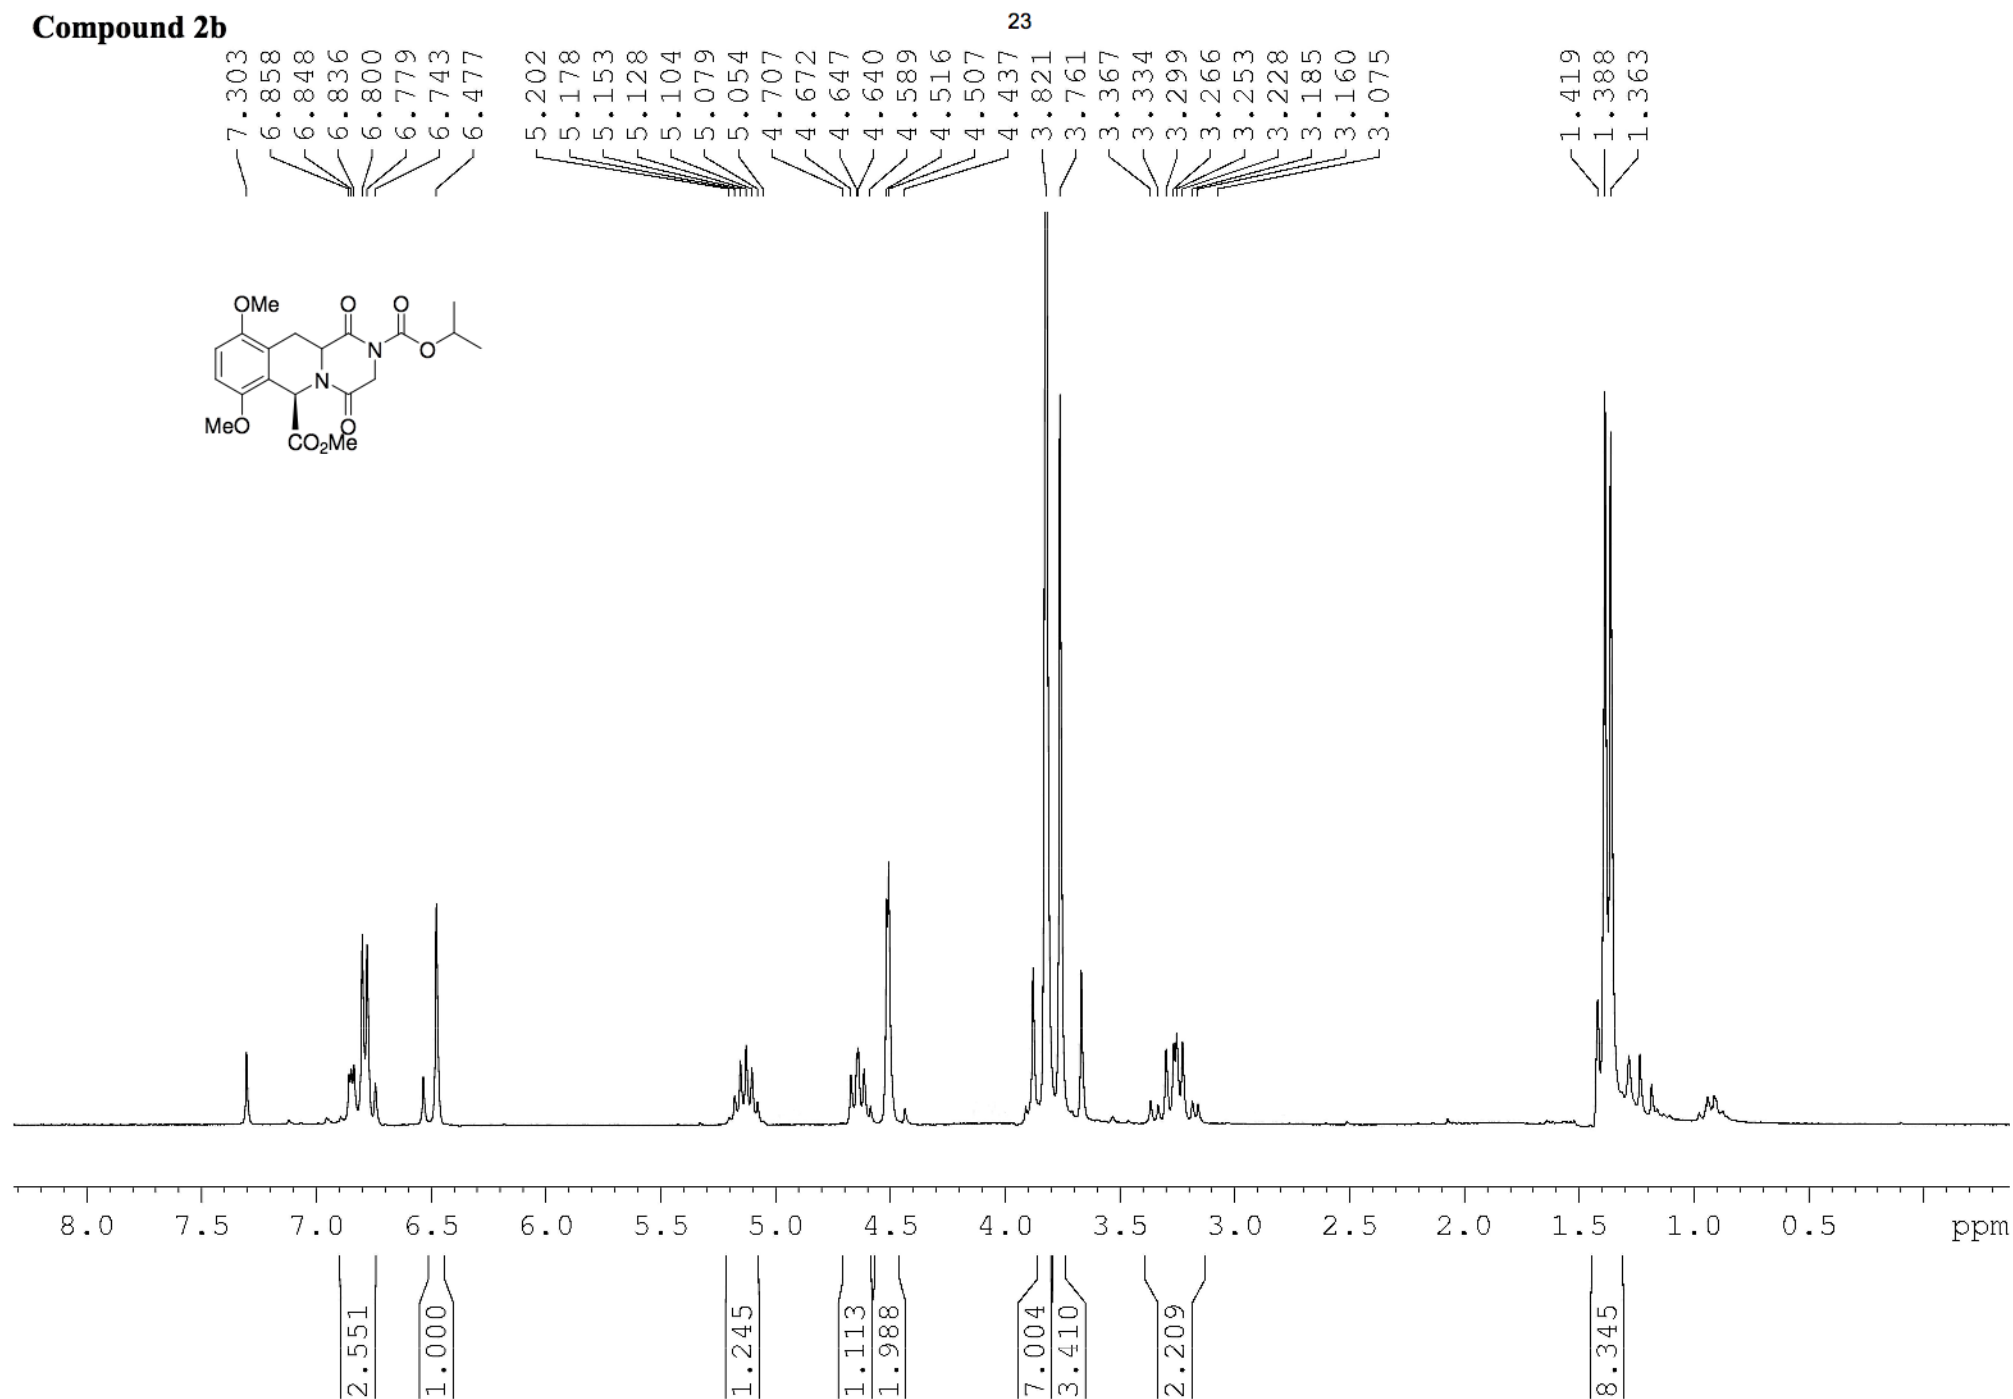

**Compound 2b**

24

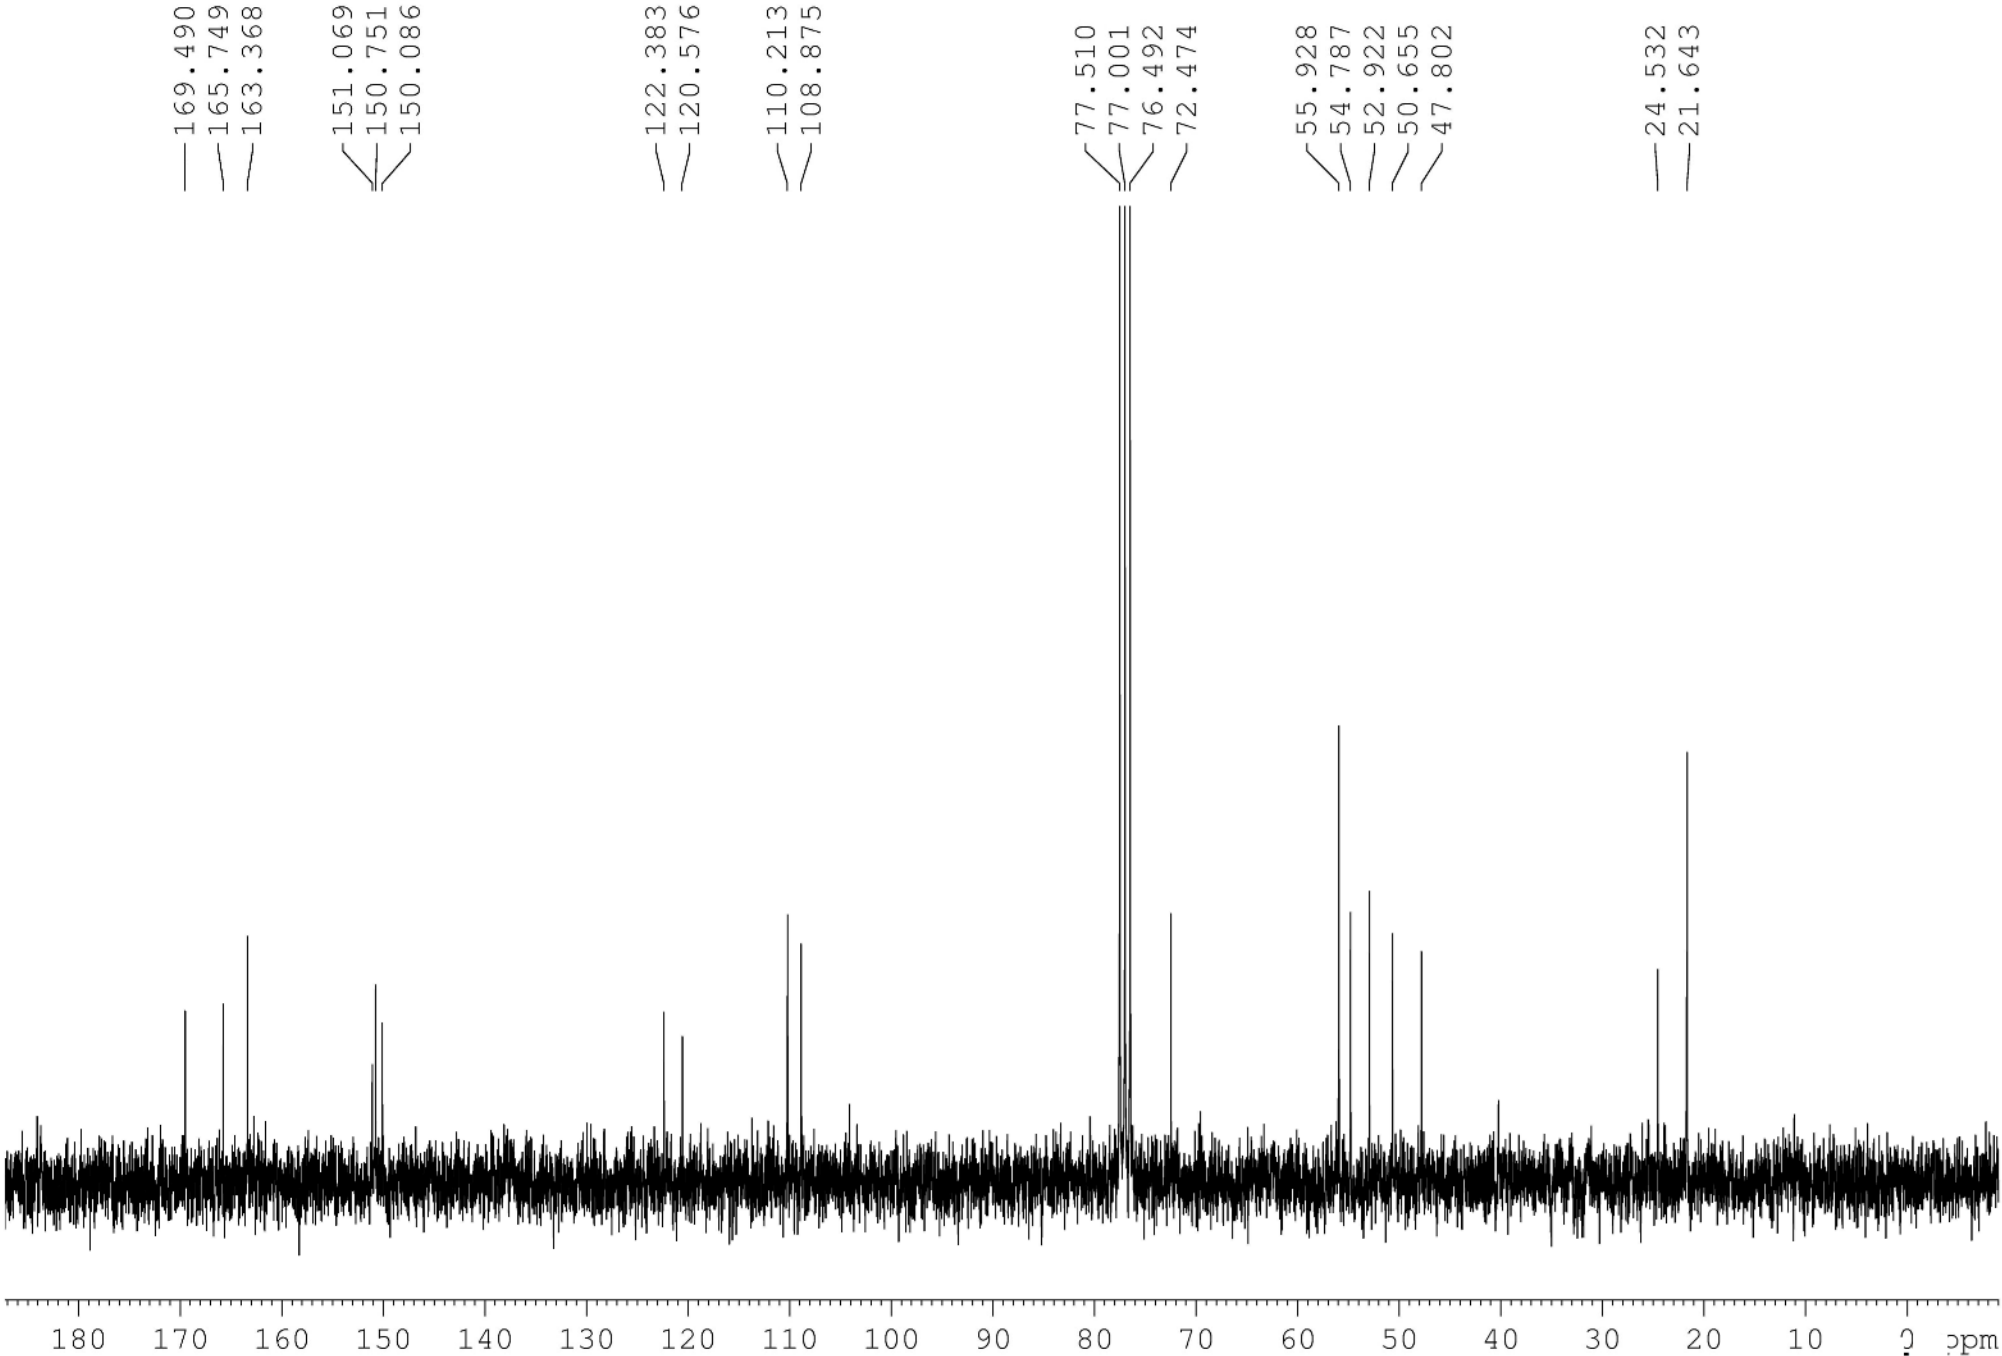

Compound 2b

HRMS

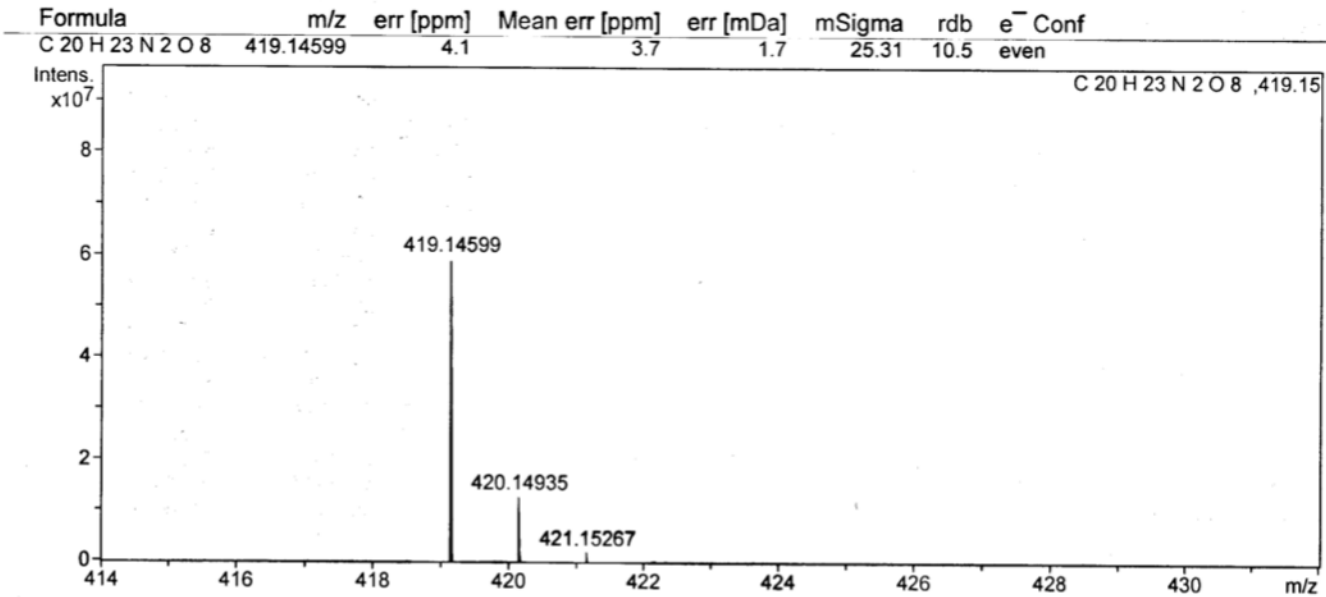

**Compound 2c**

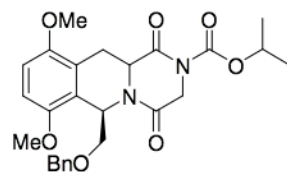

26

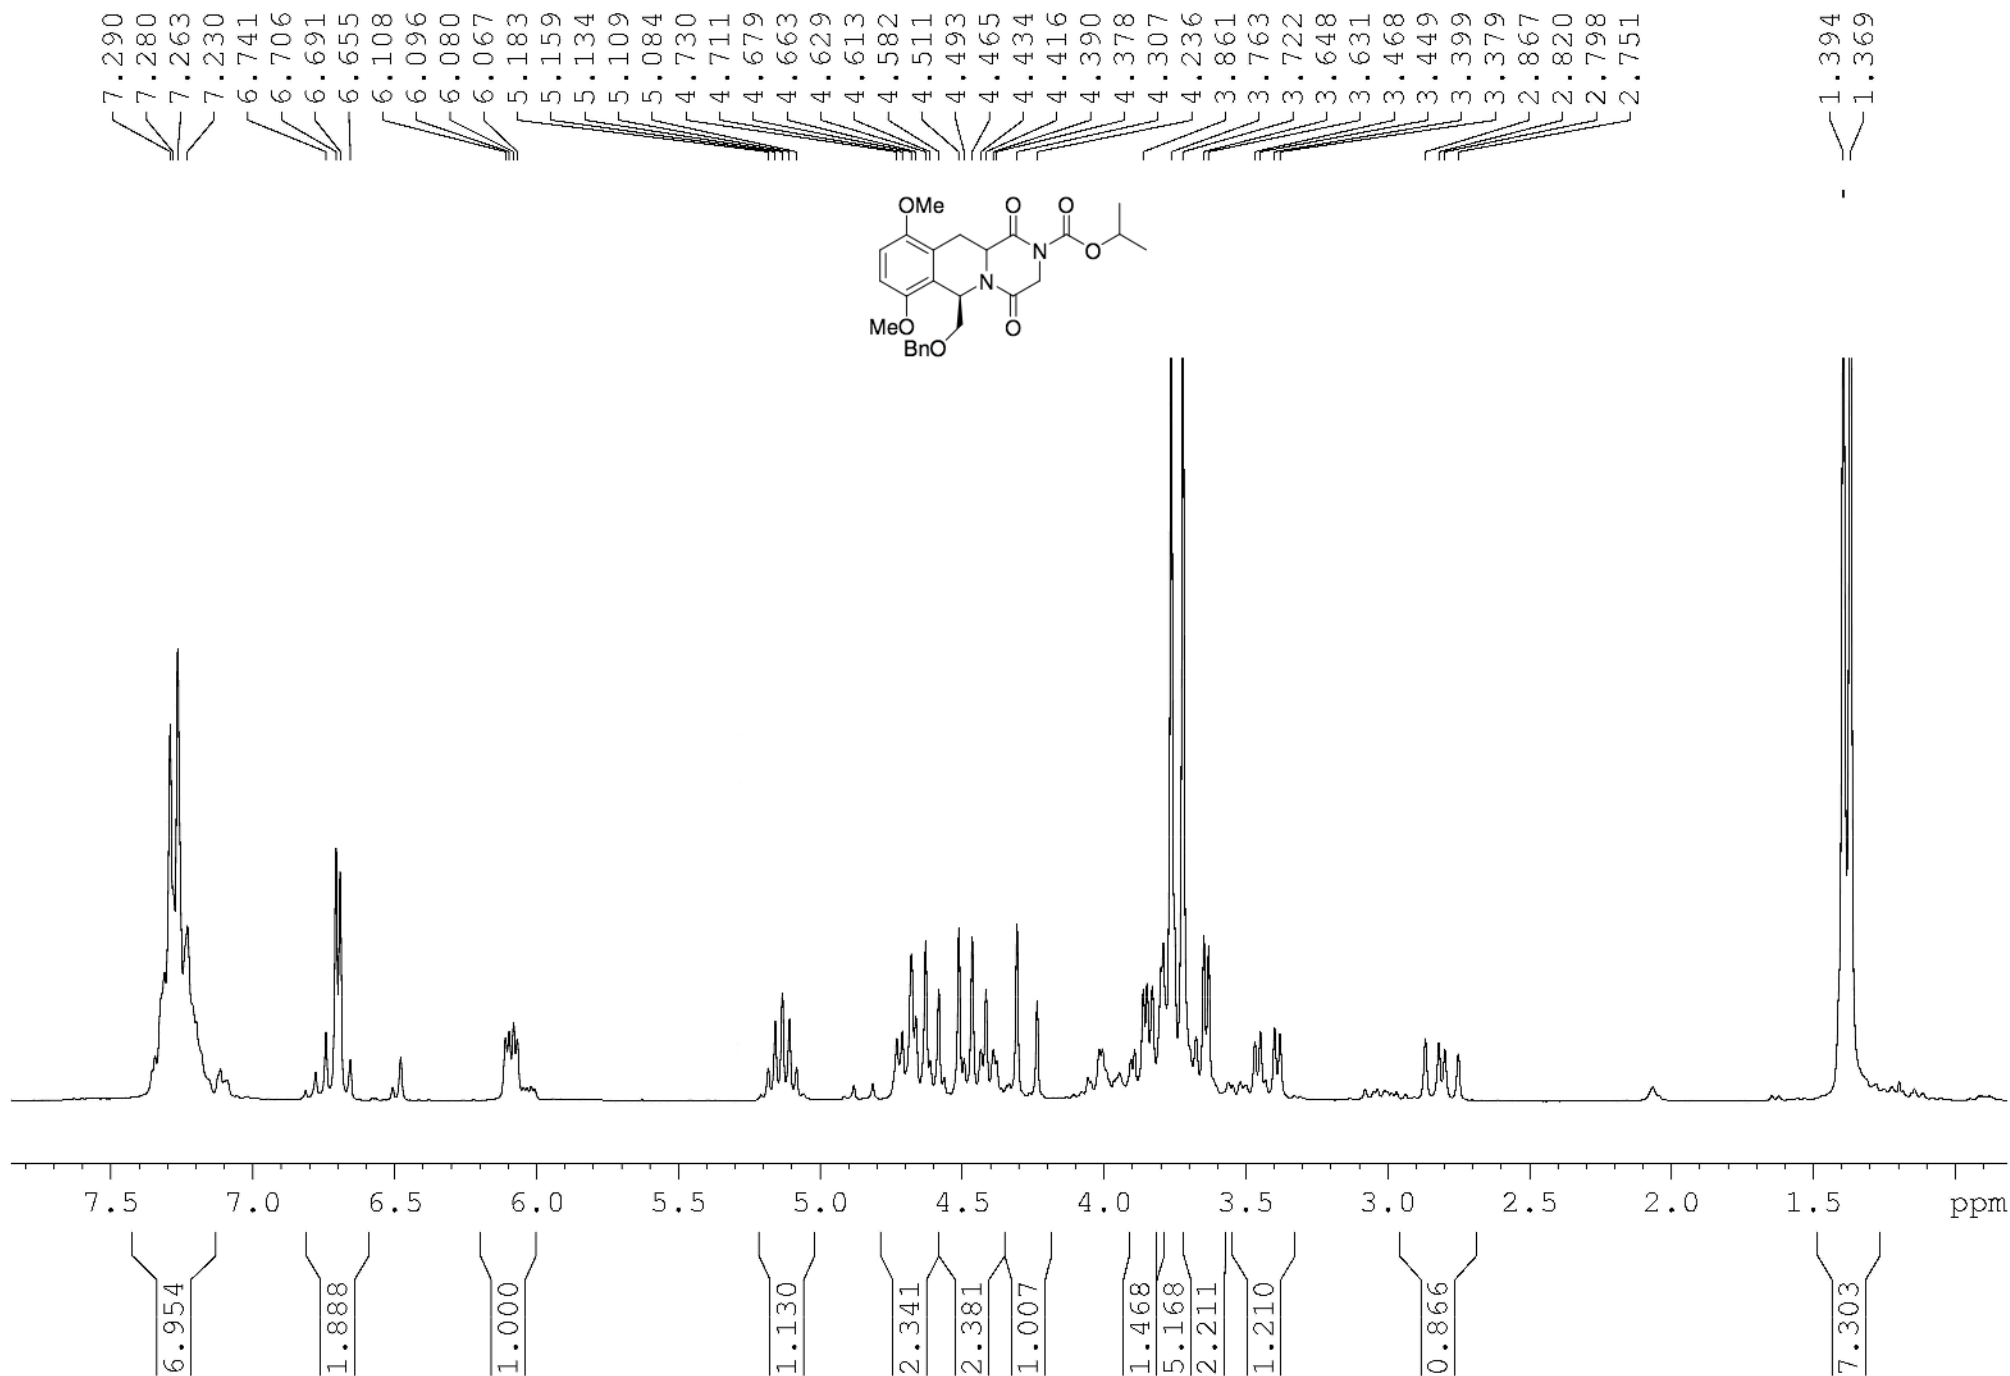

Compound 2c

27

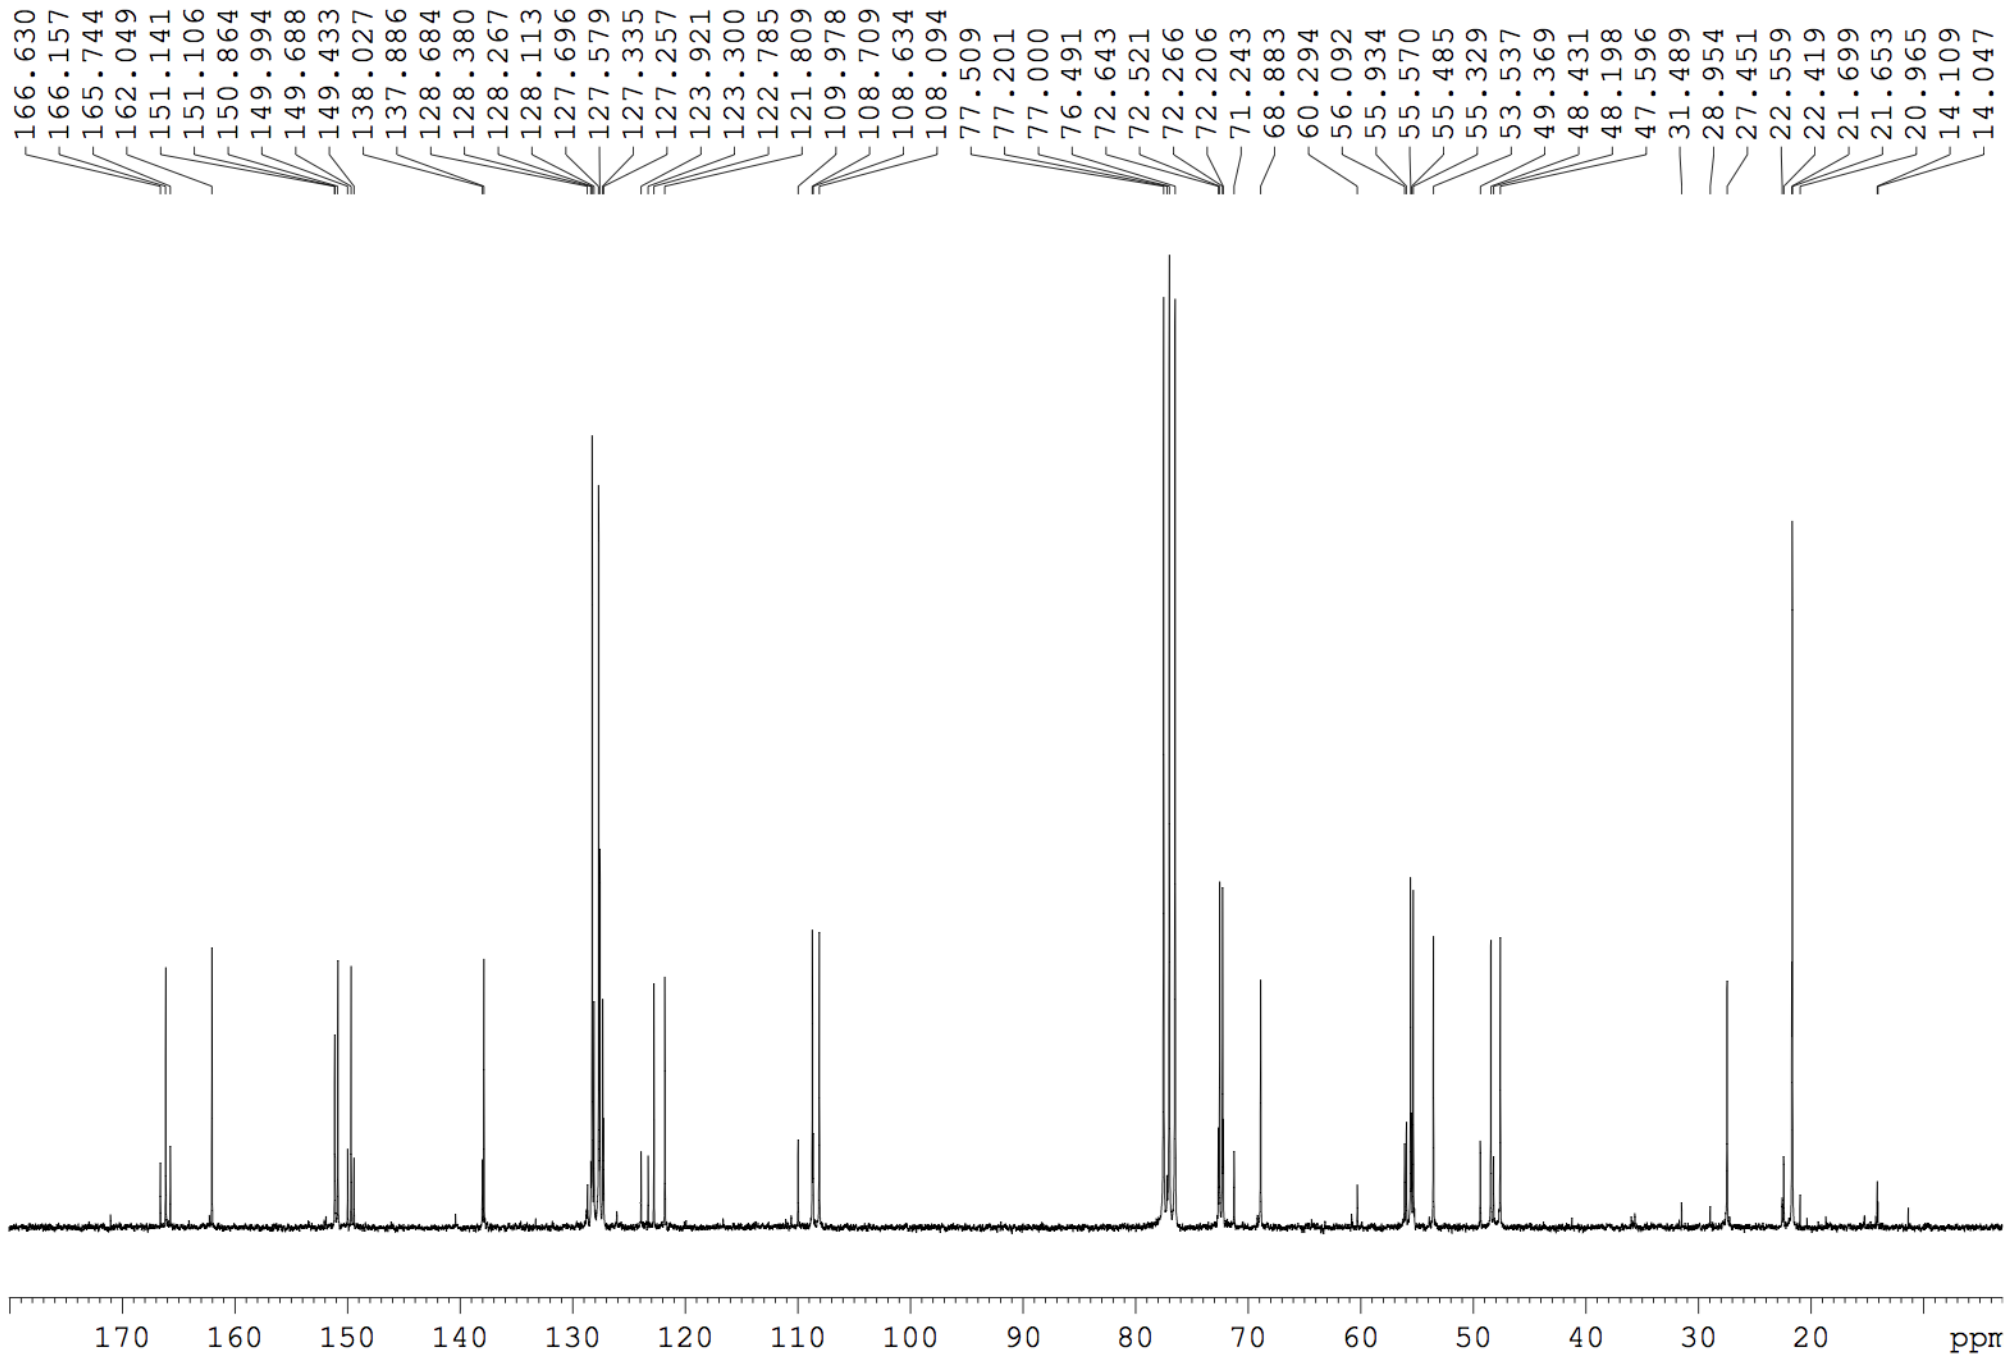



Compound 2c

HRMS

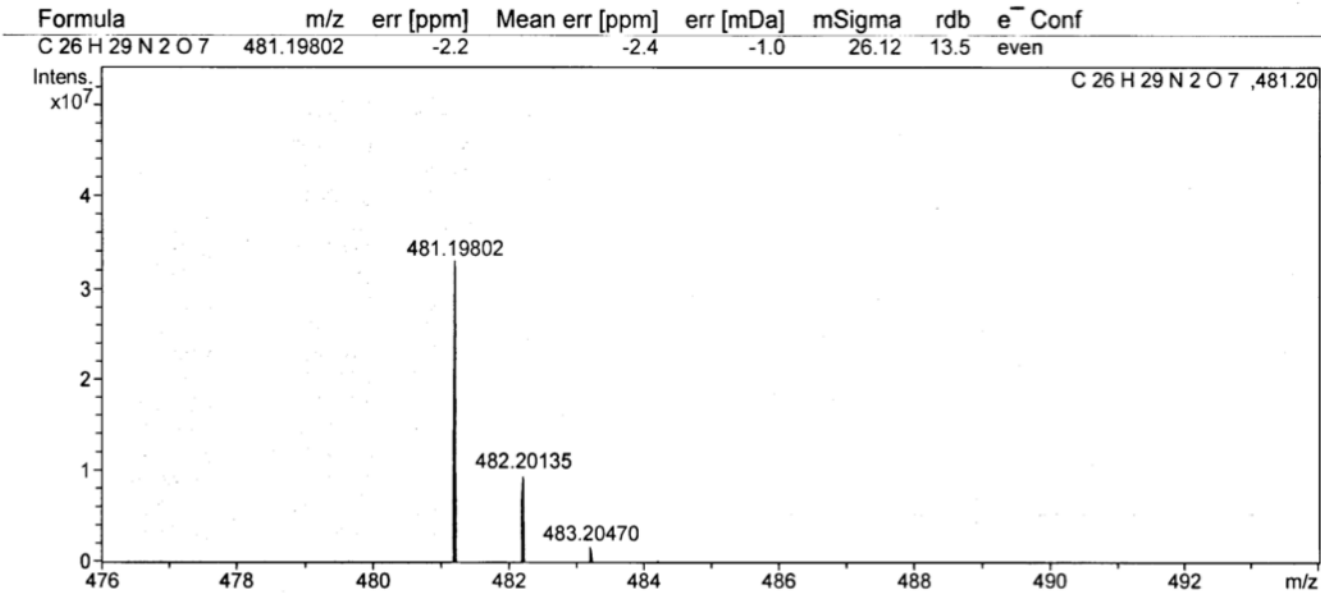

**Compound 2d**

29

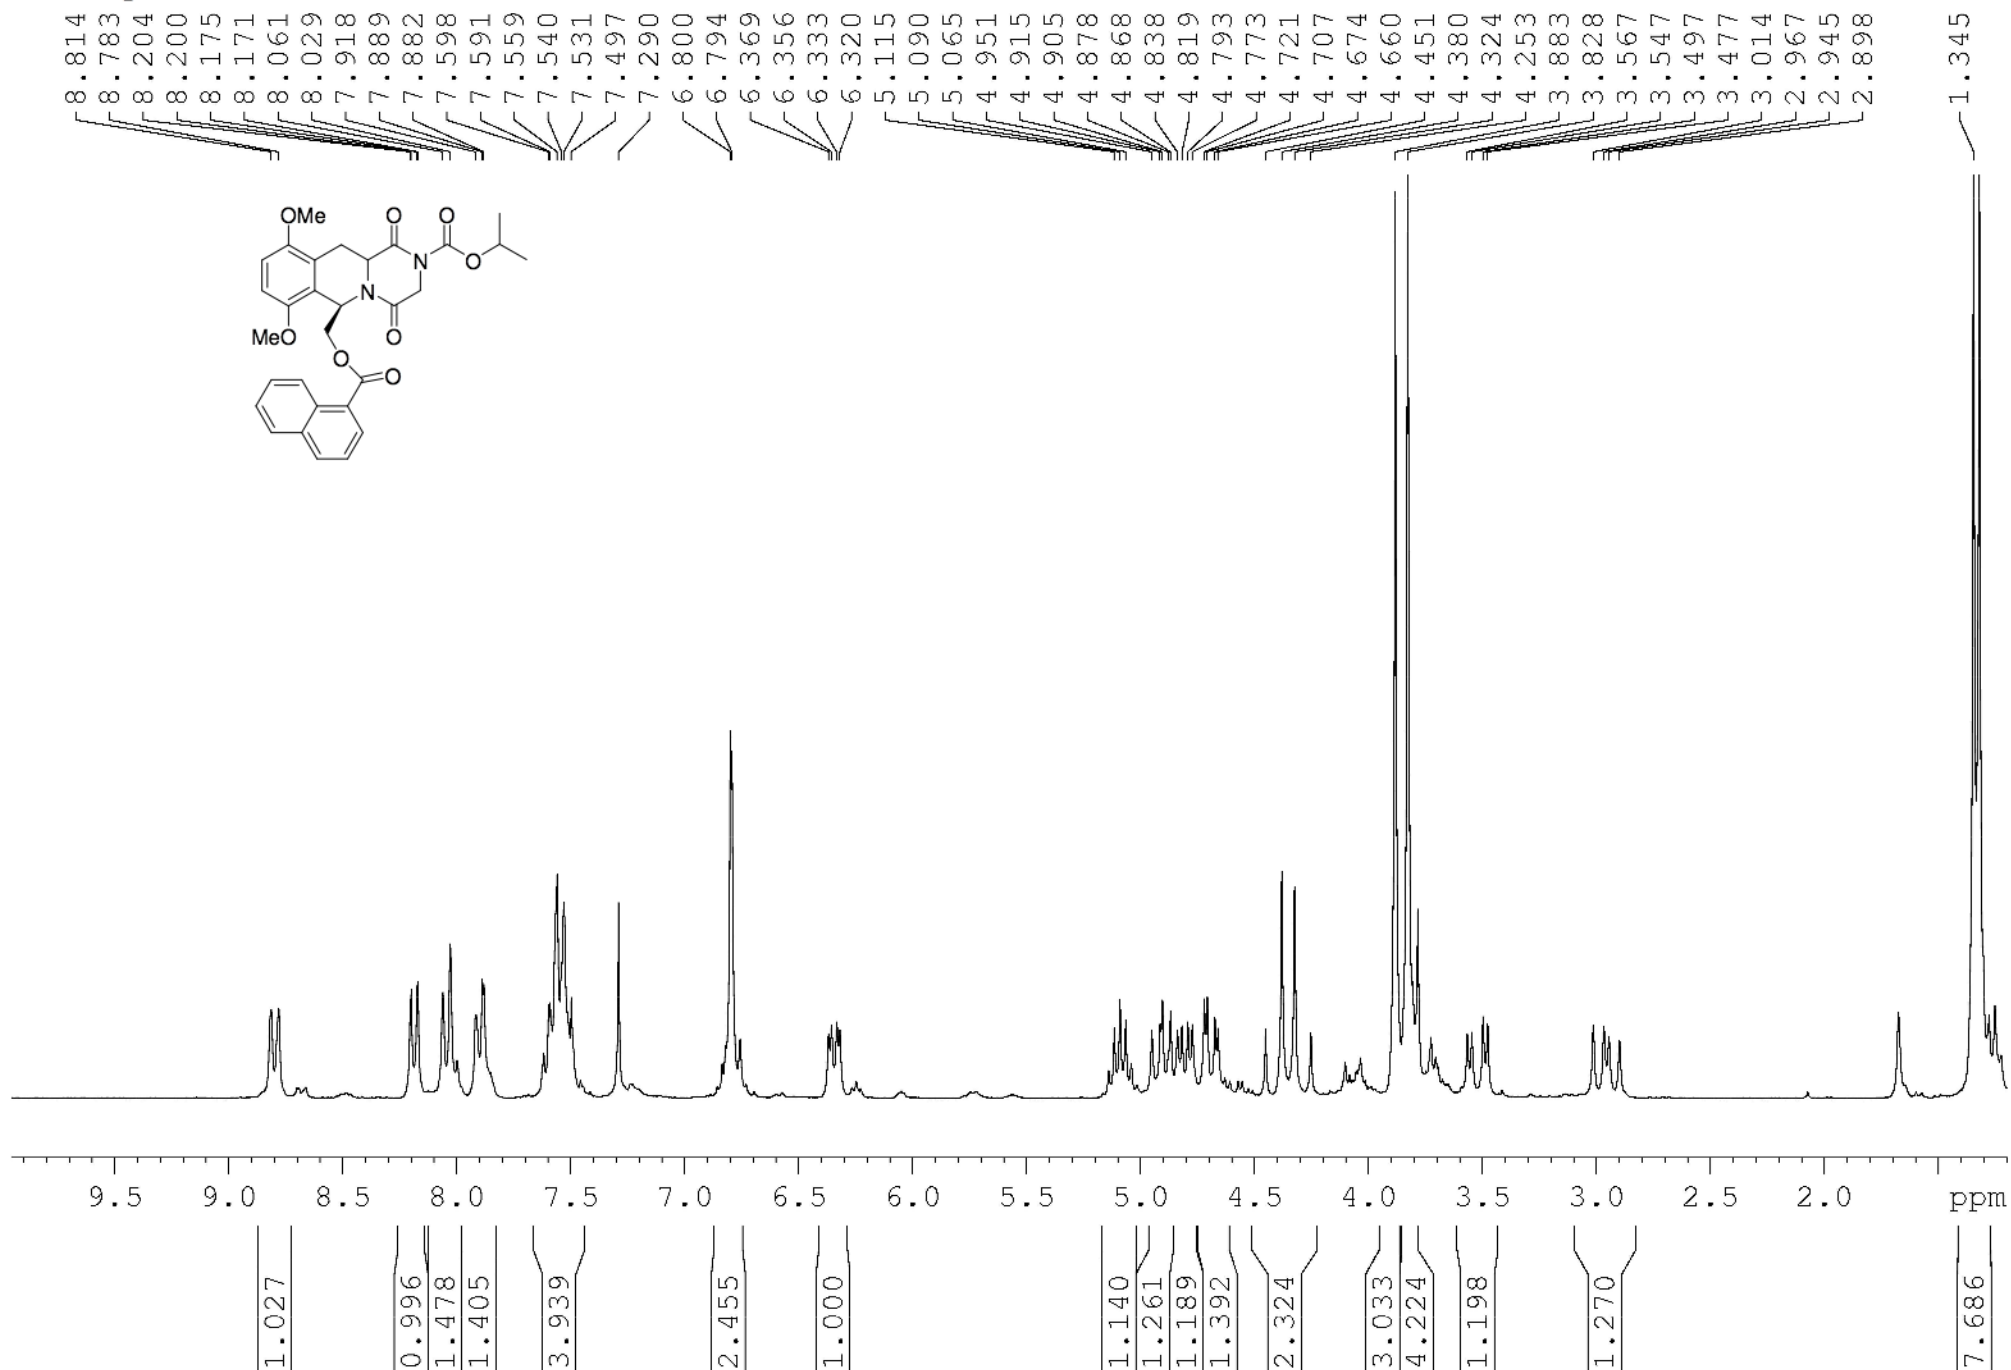

Compound 2d

30

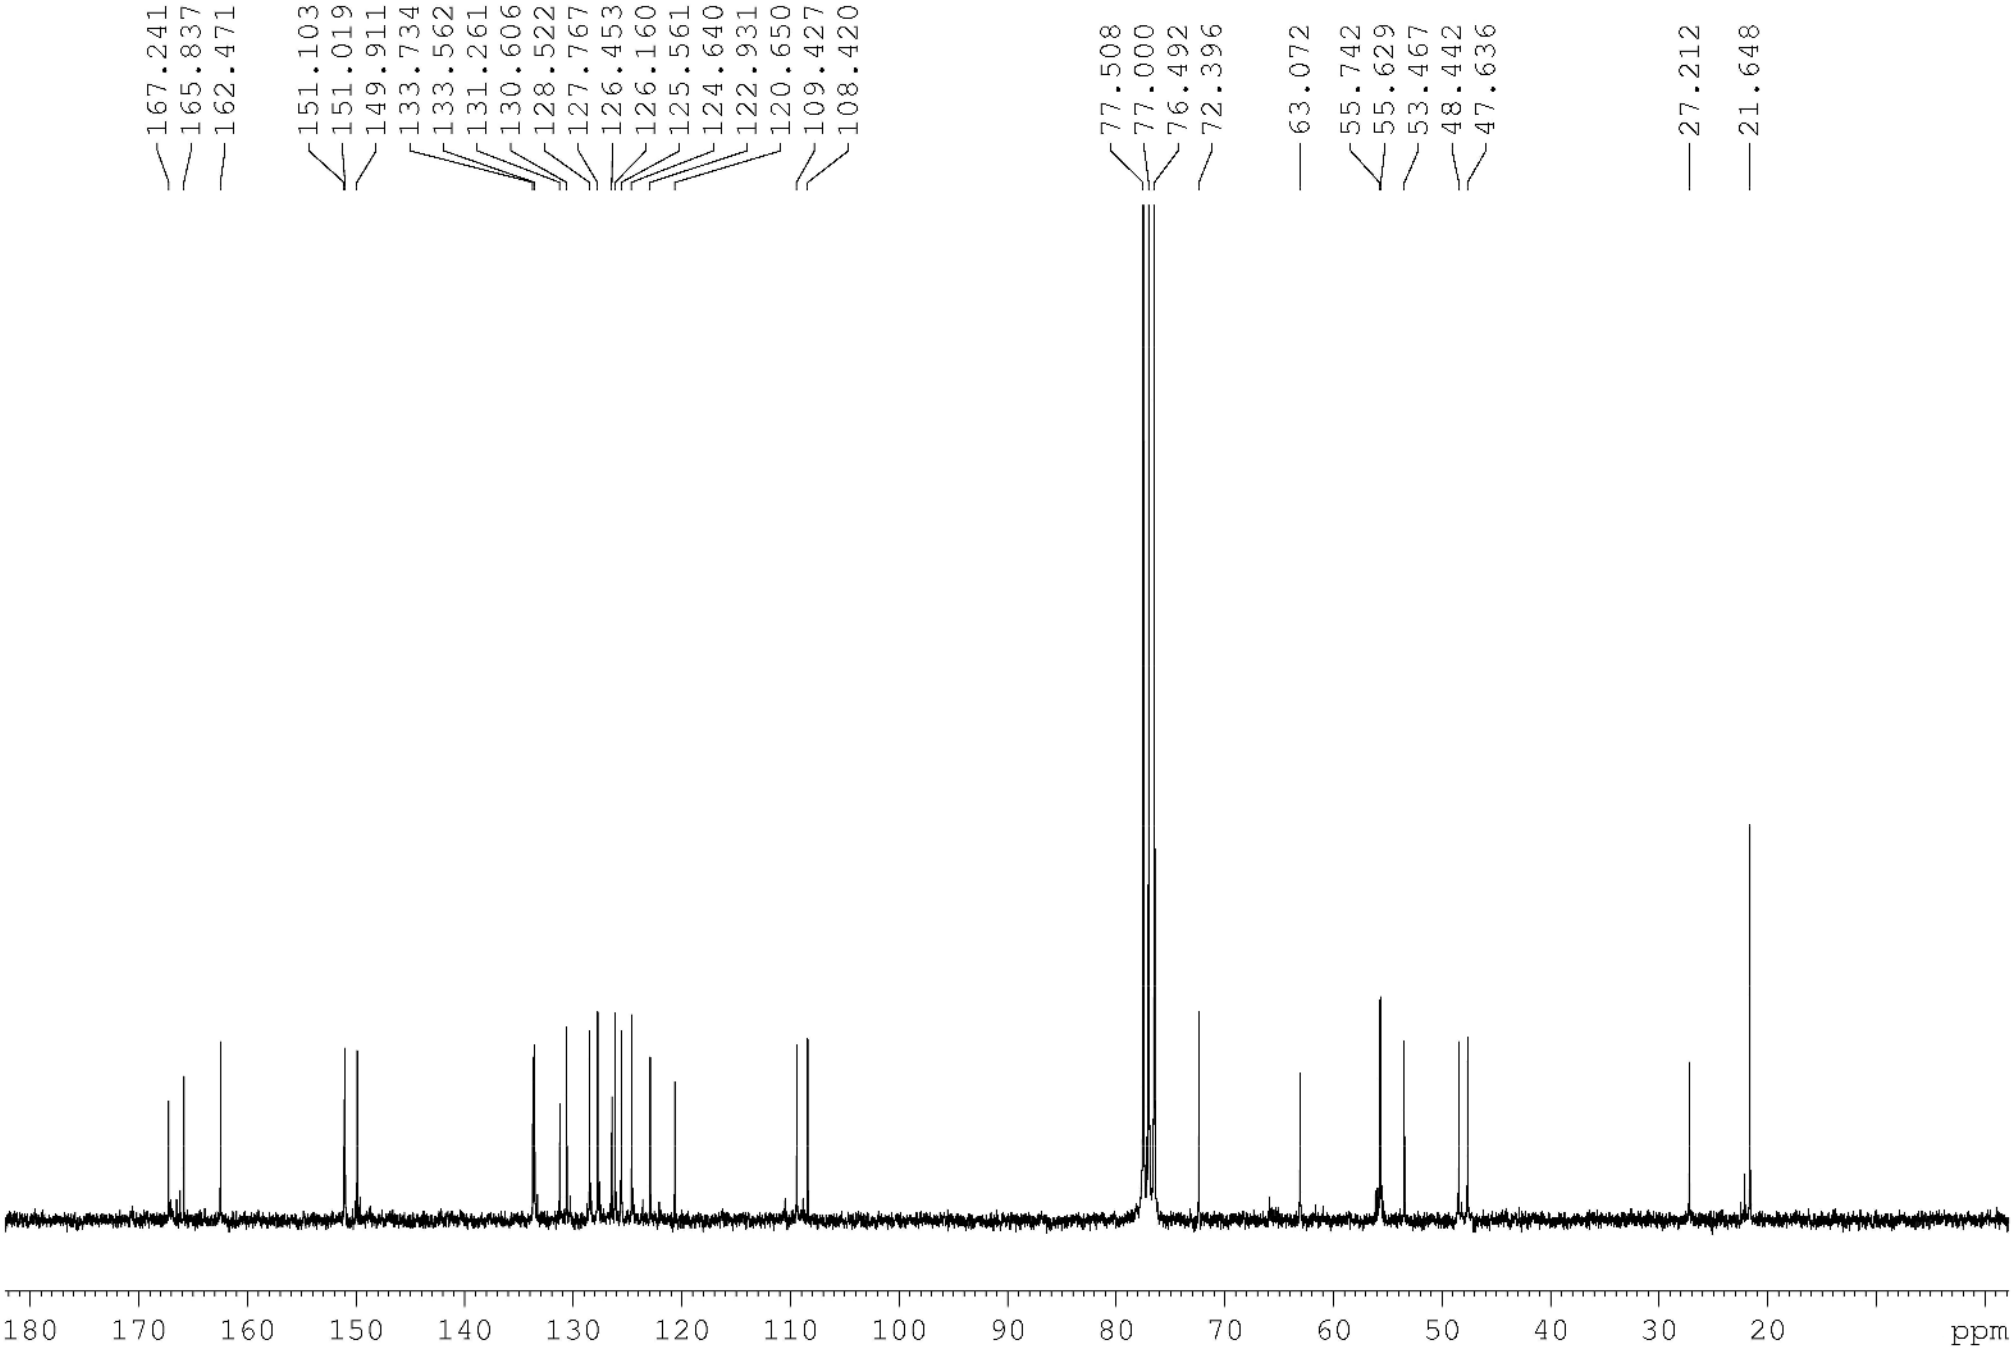

Compound 2d

HRMS

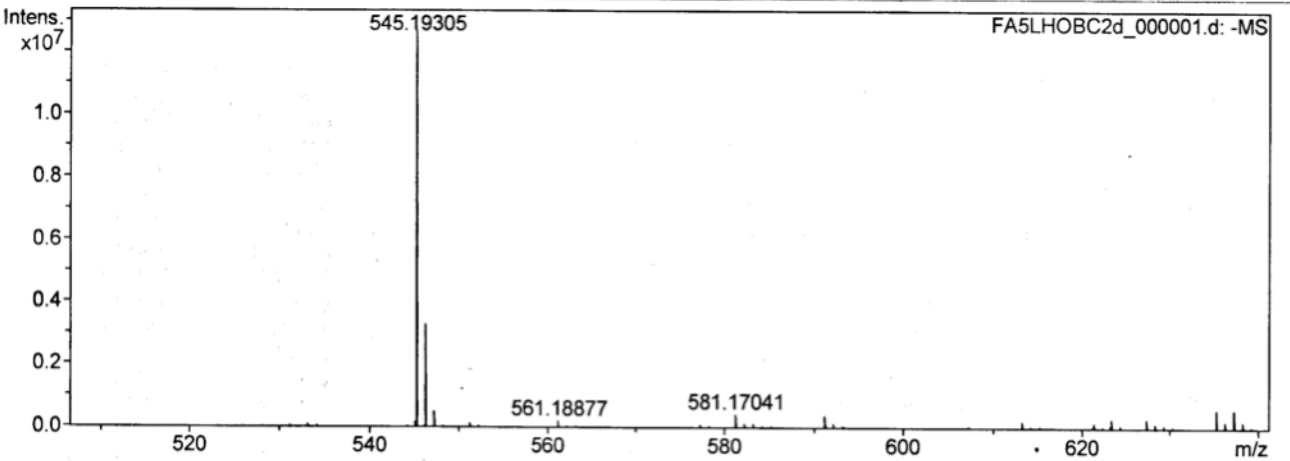

Compound 3a

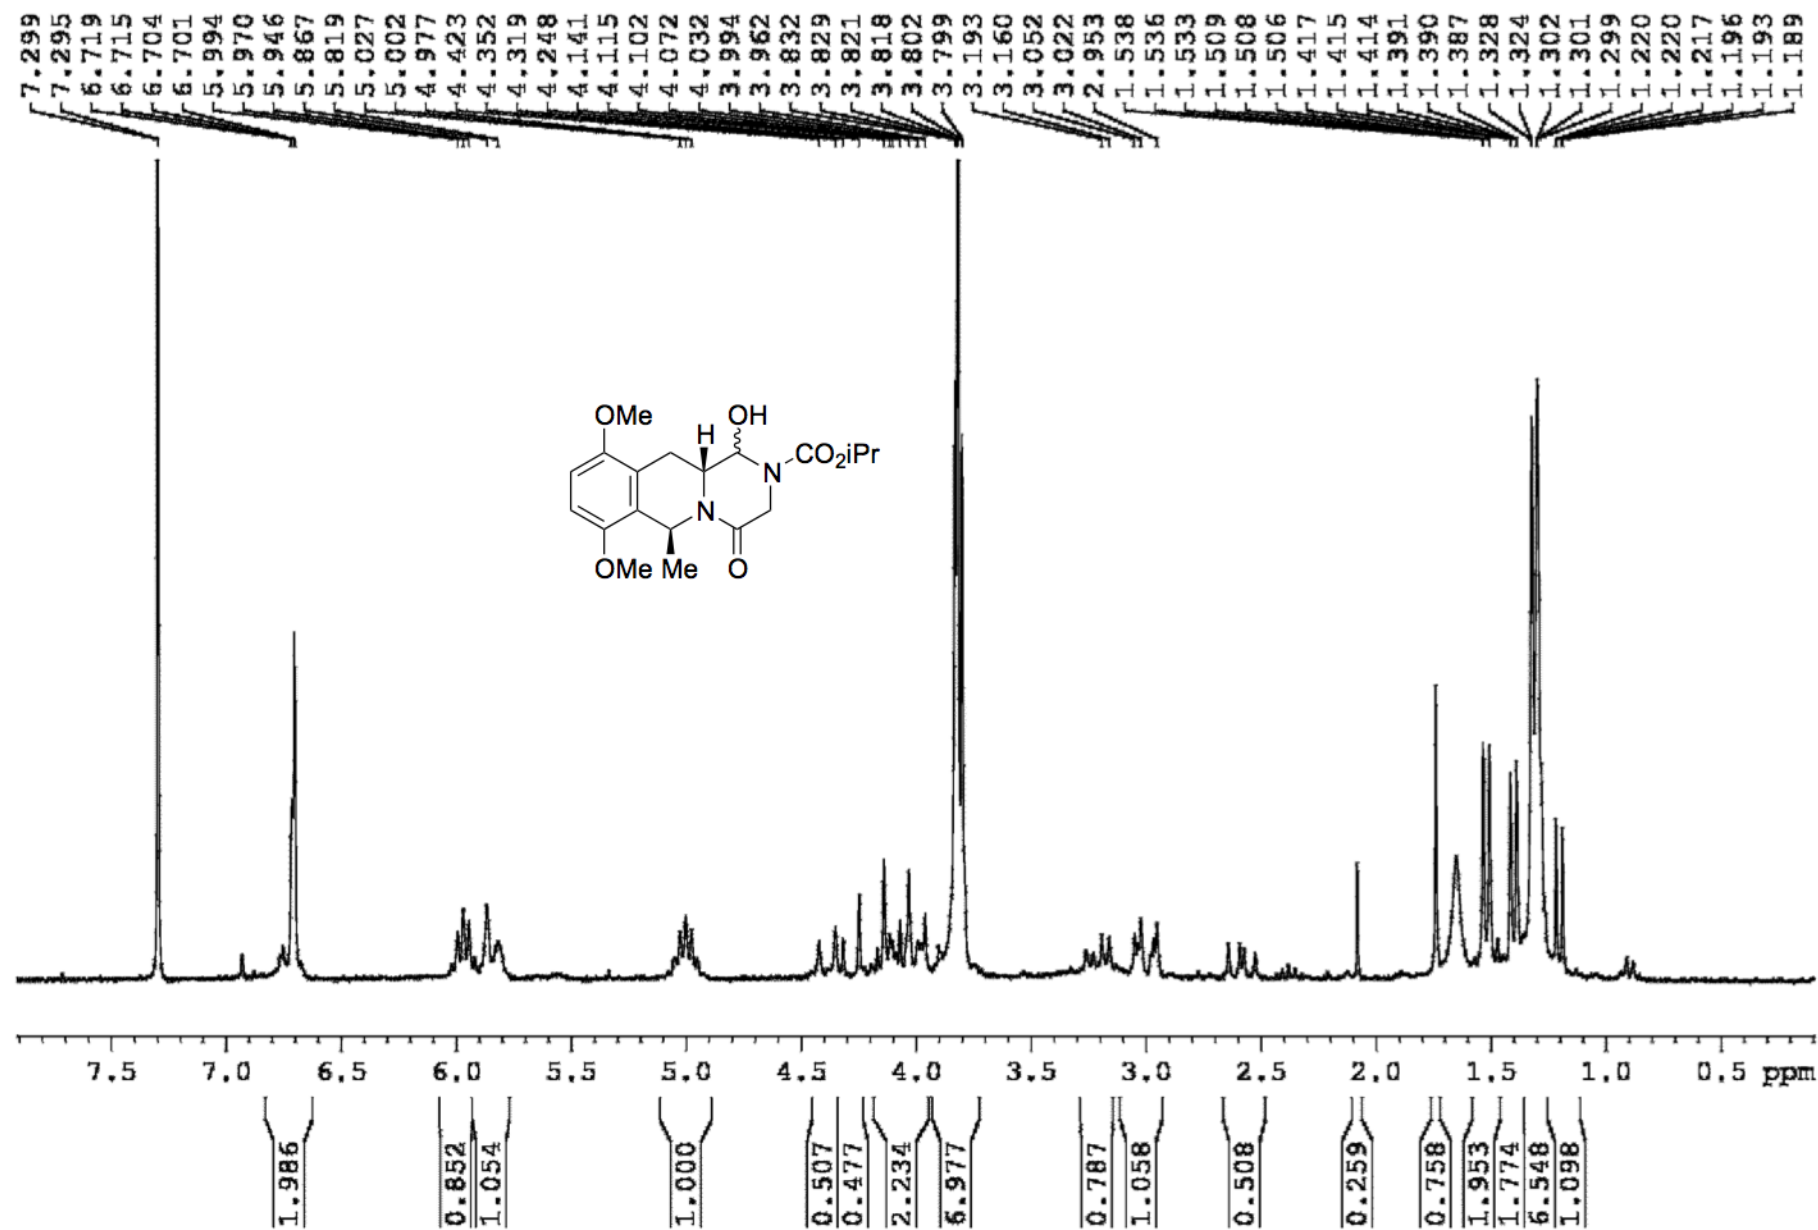

Compound 3a

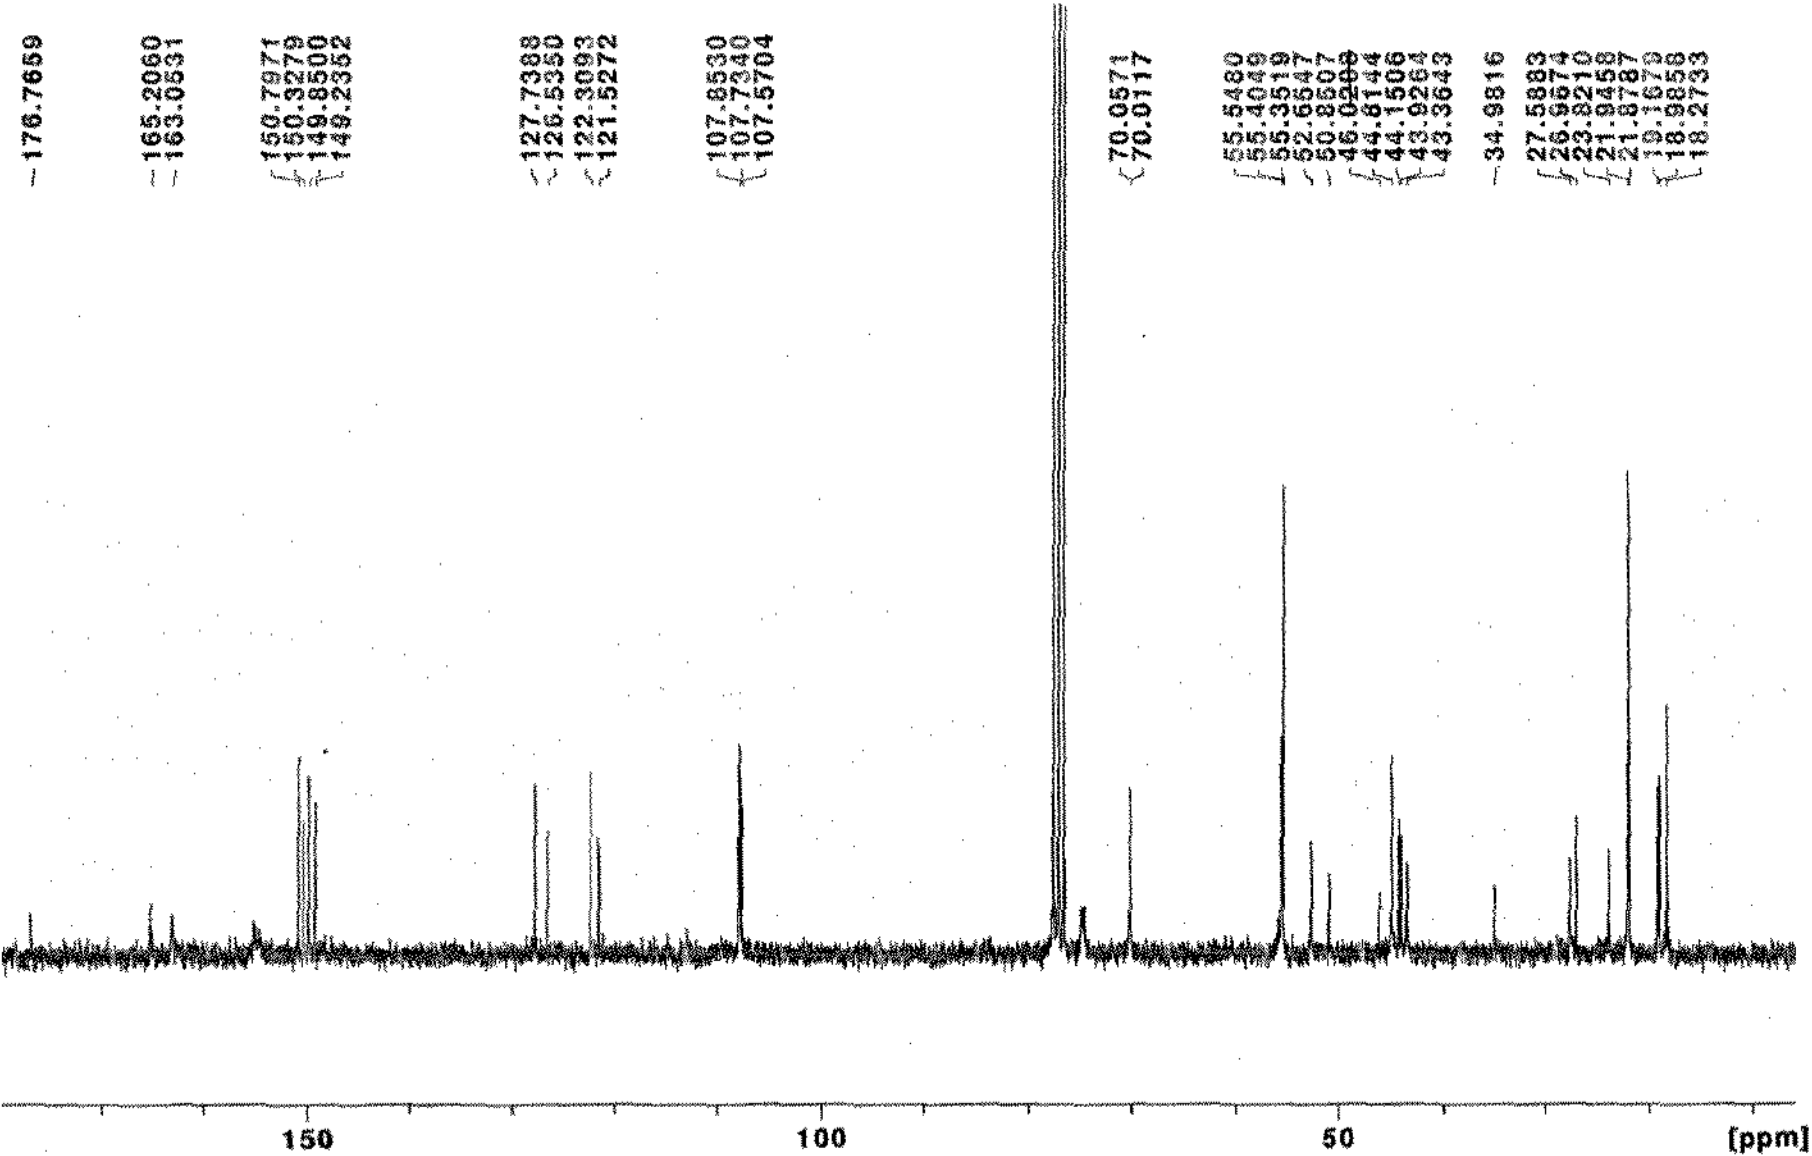

Compound 4

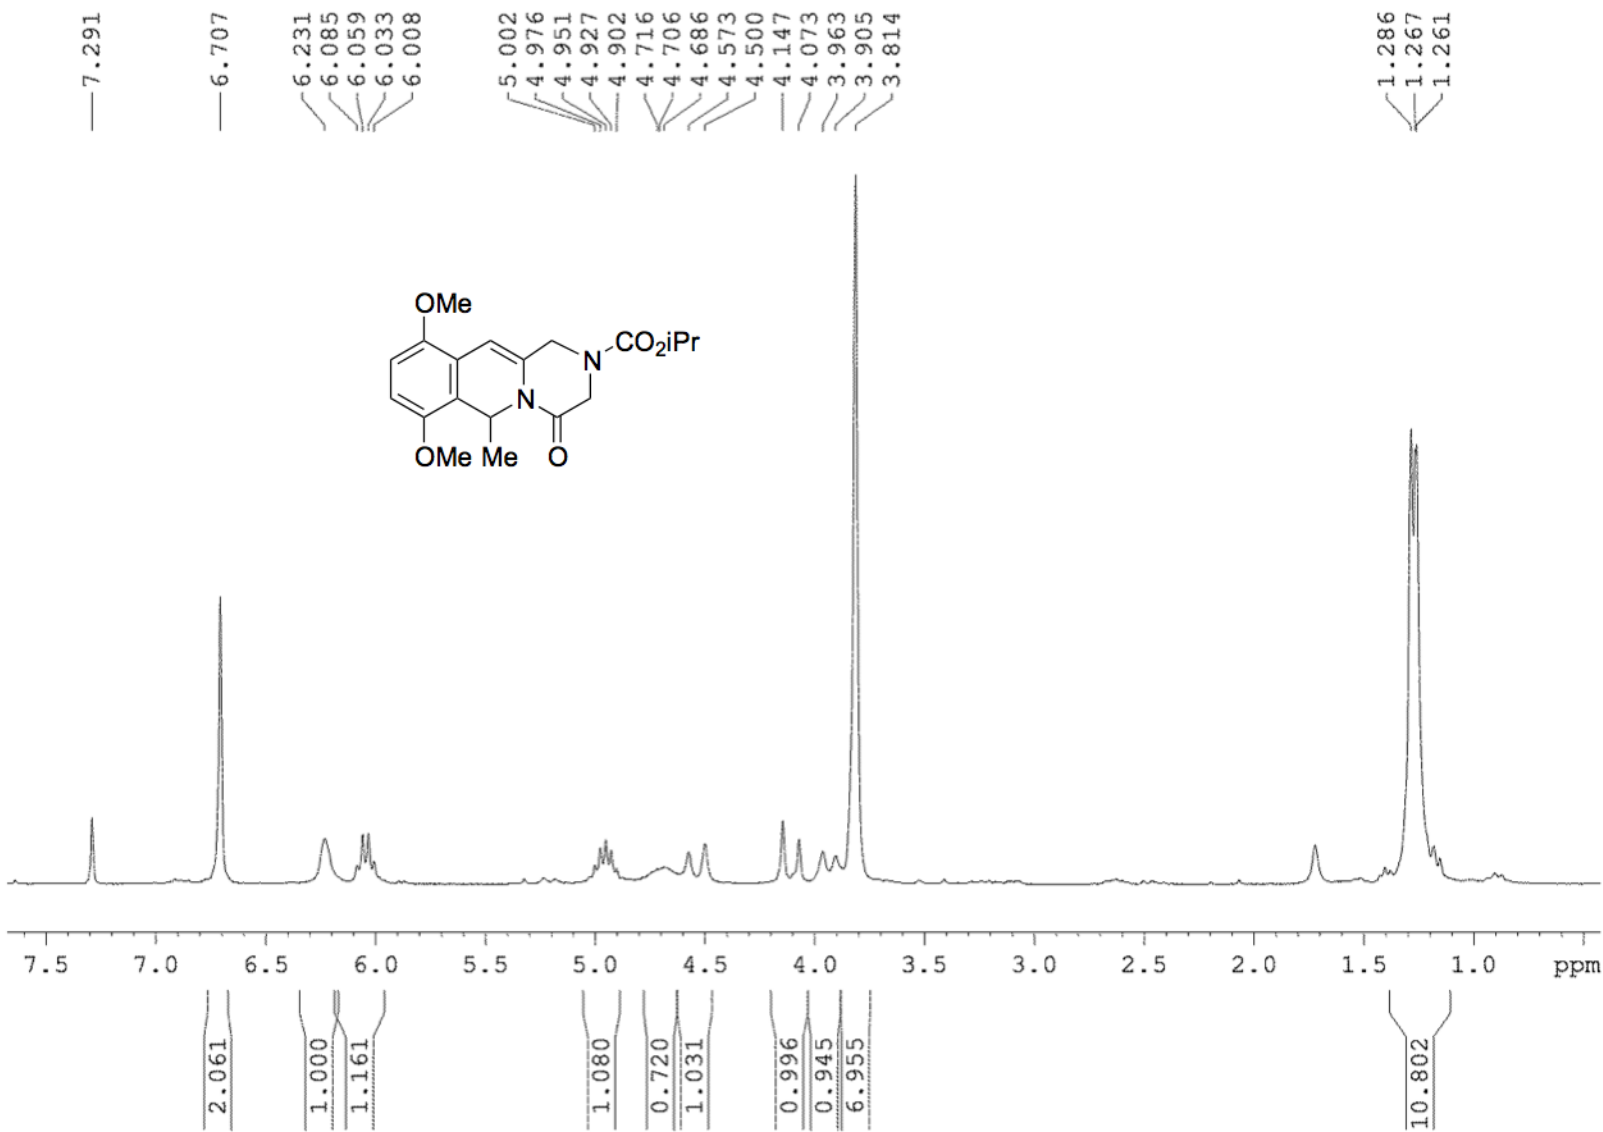

Compound 4

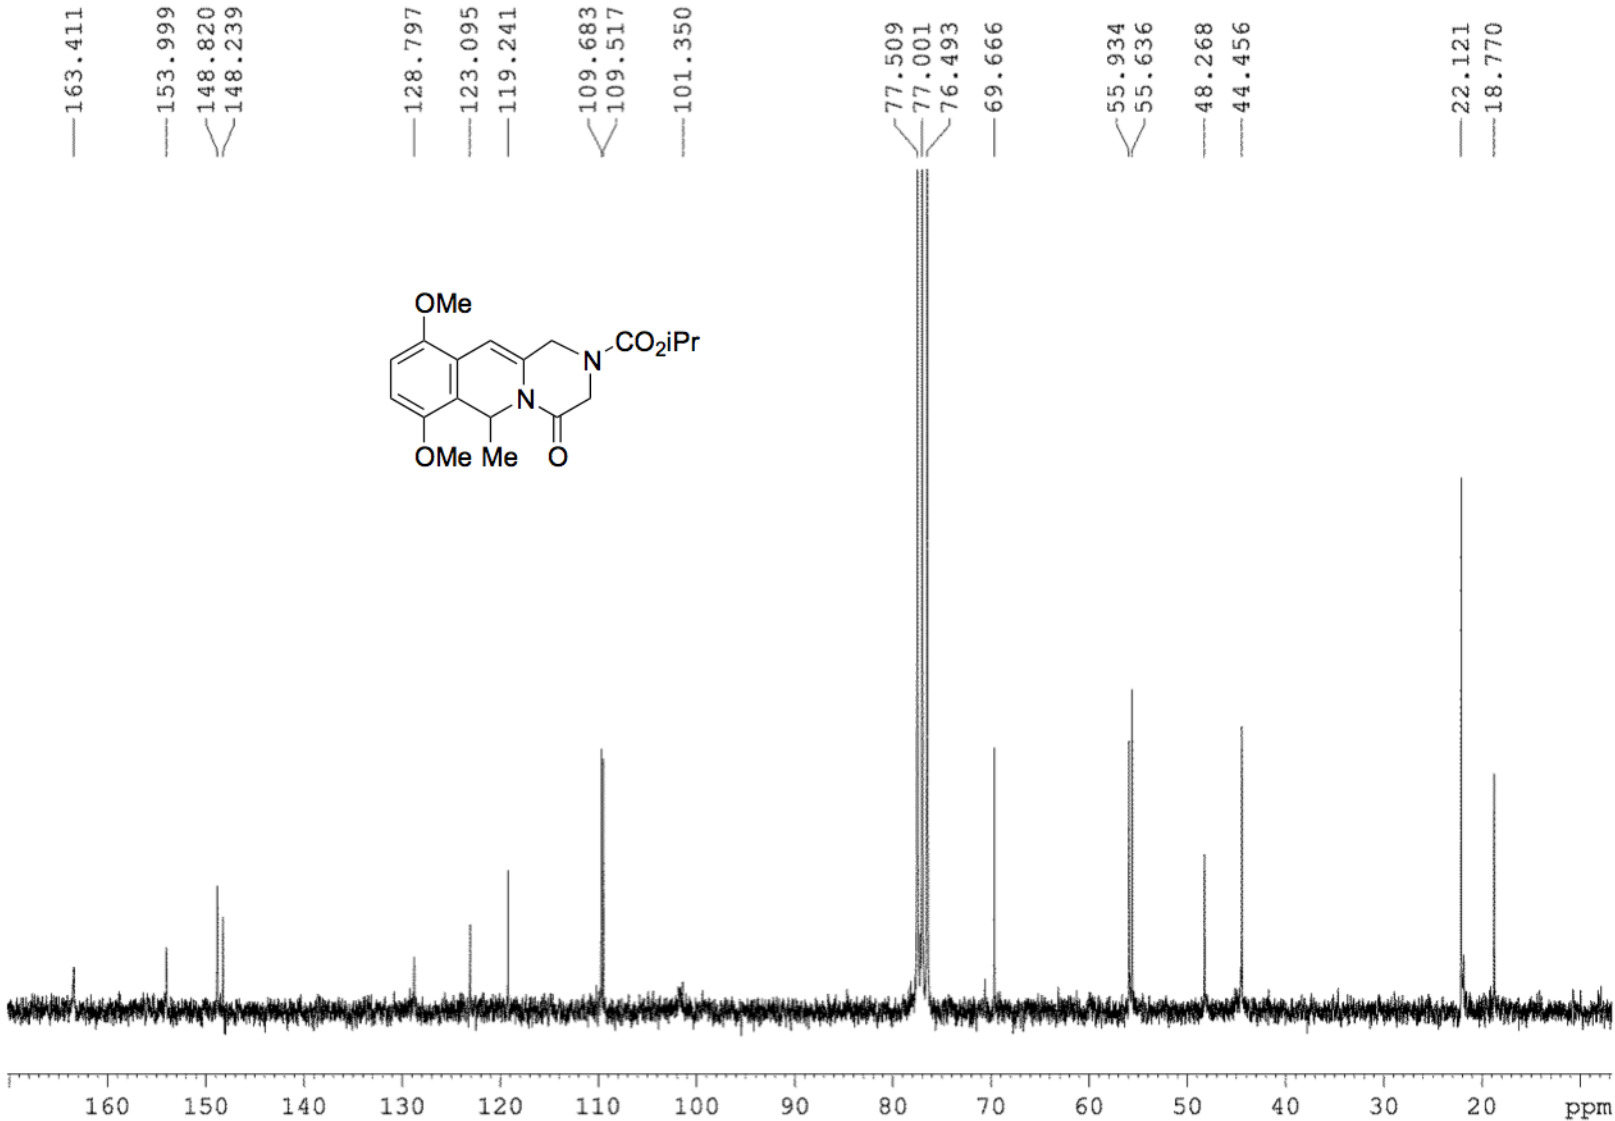



Compound 5

36

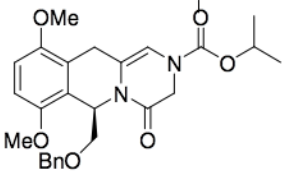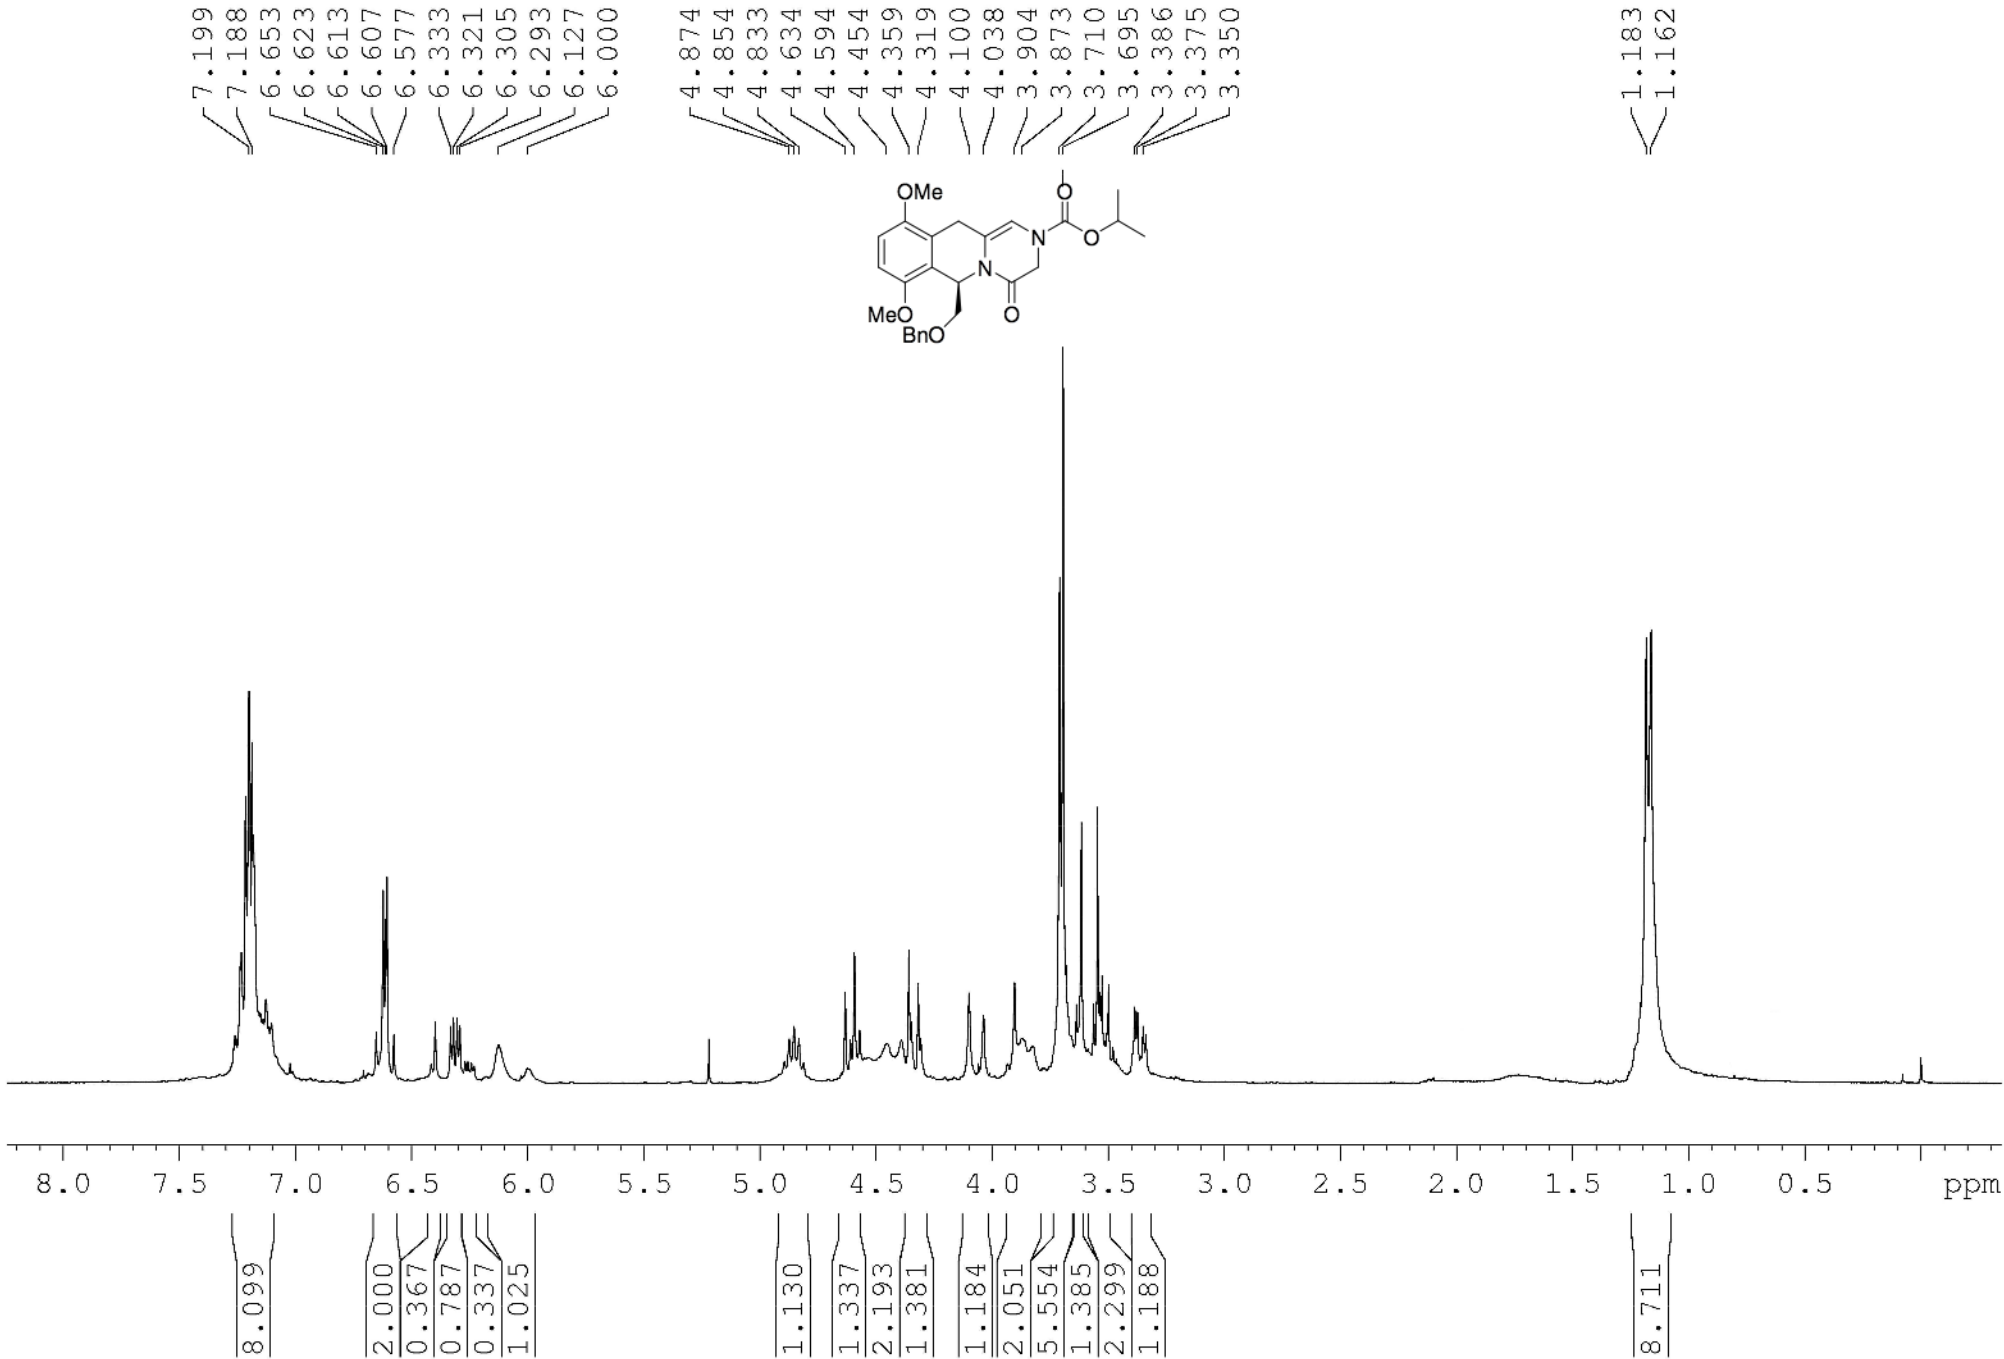

Compound 5

37

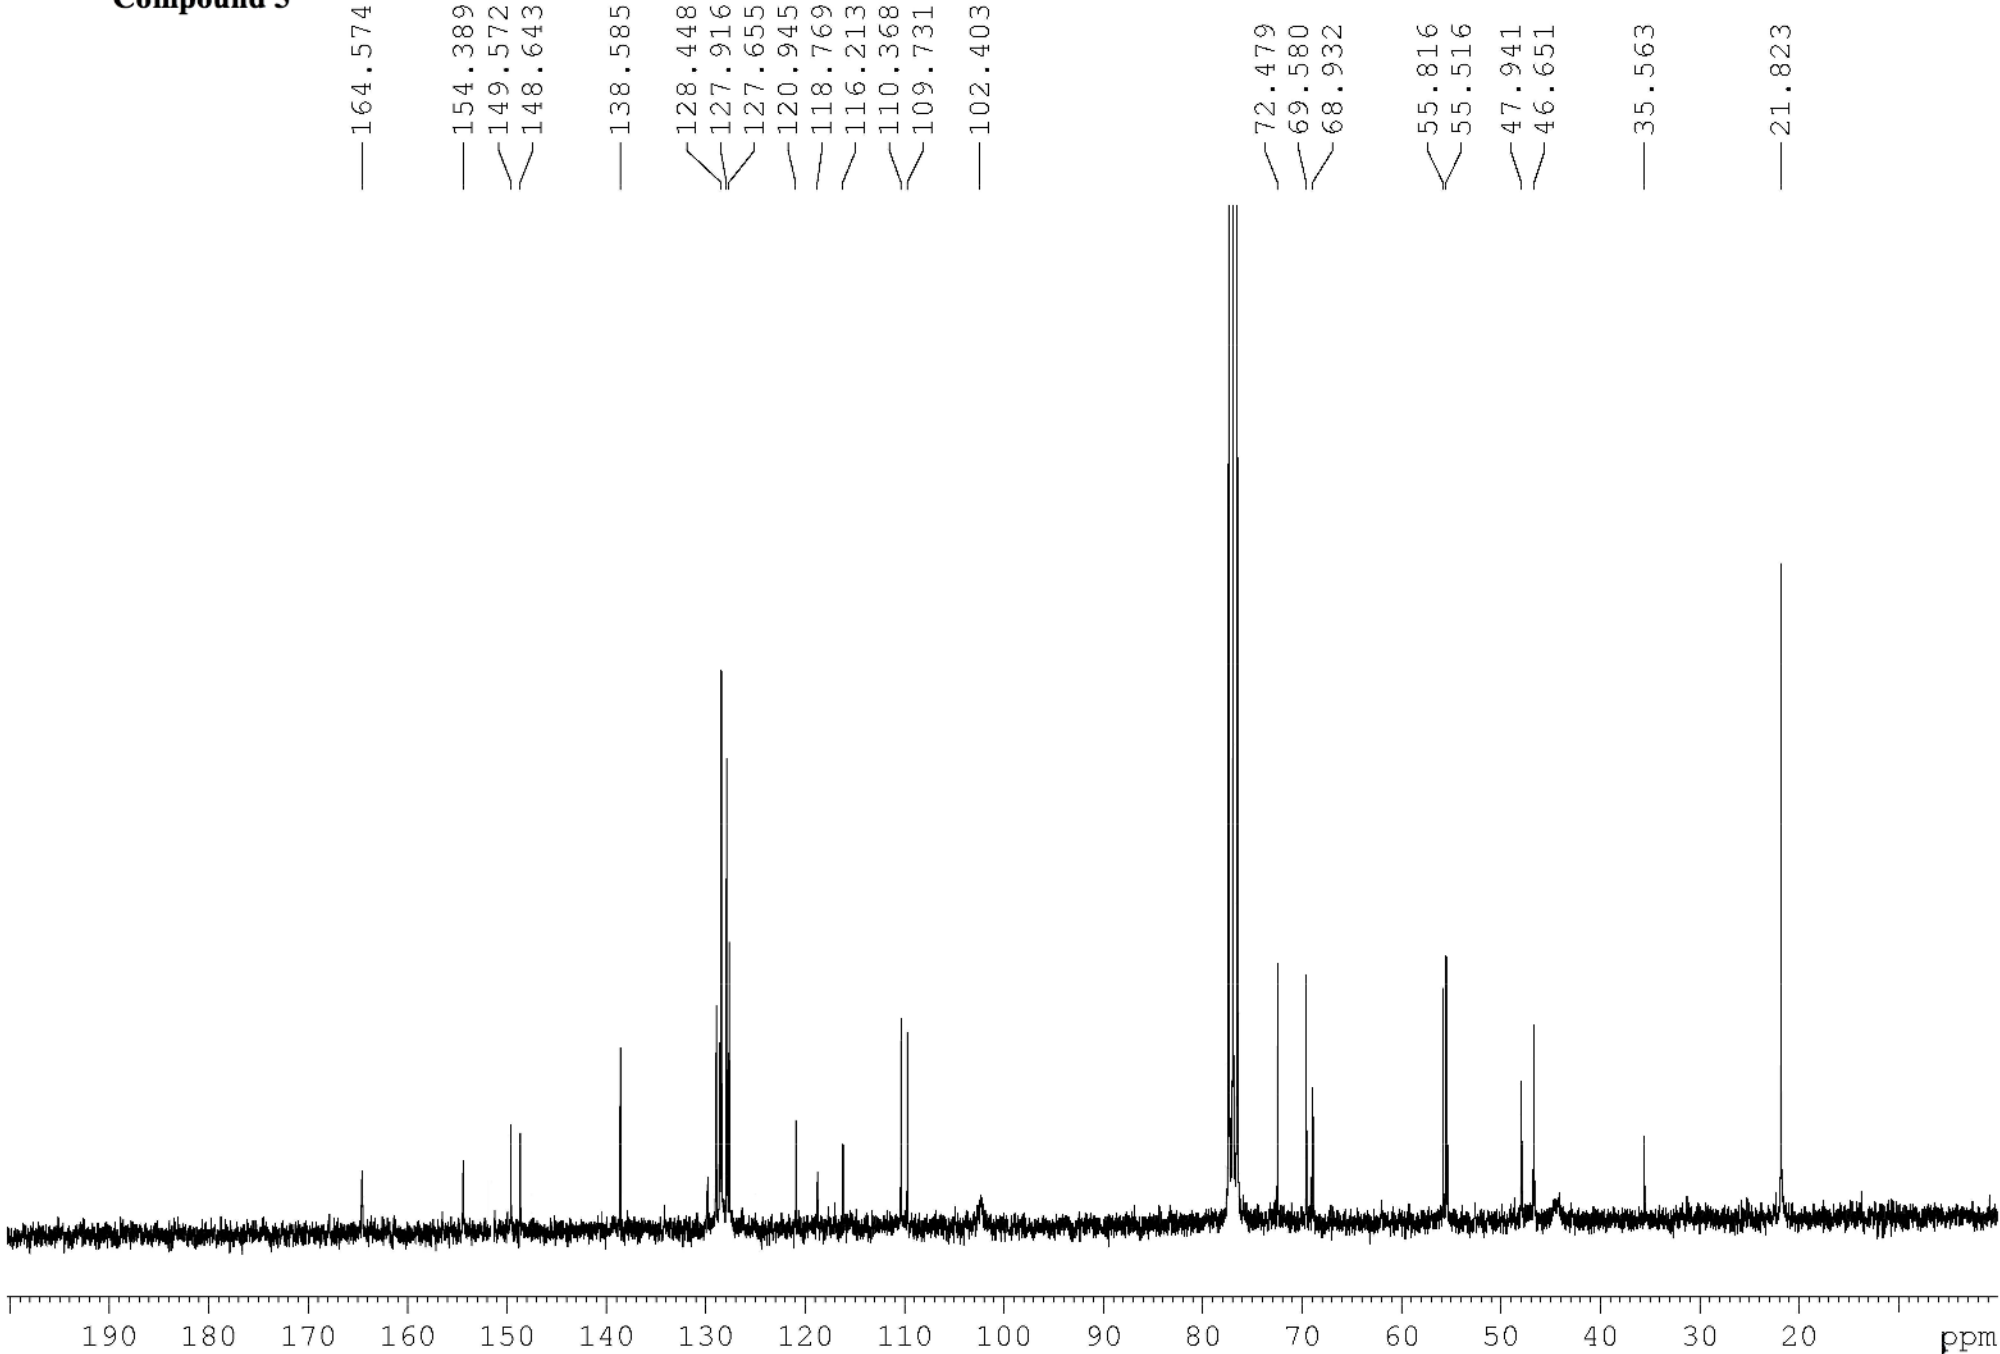

Compound 5

HRMS

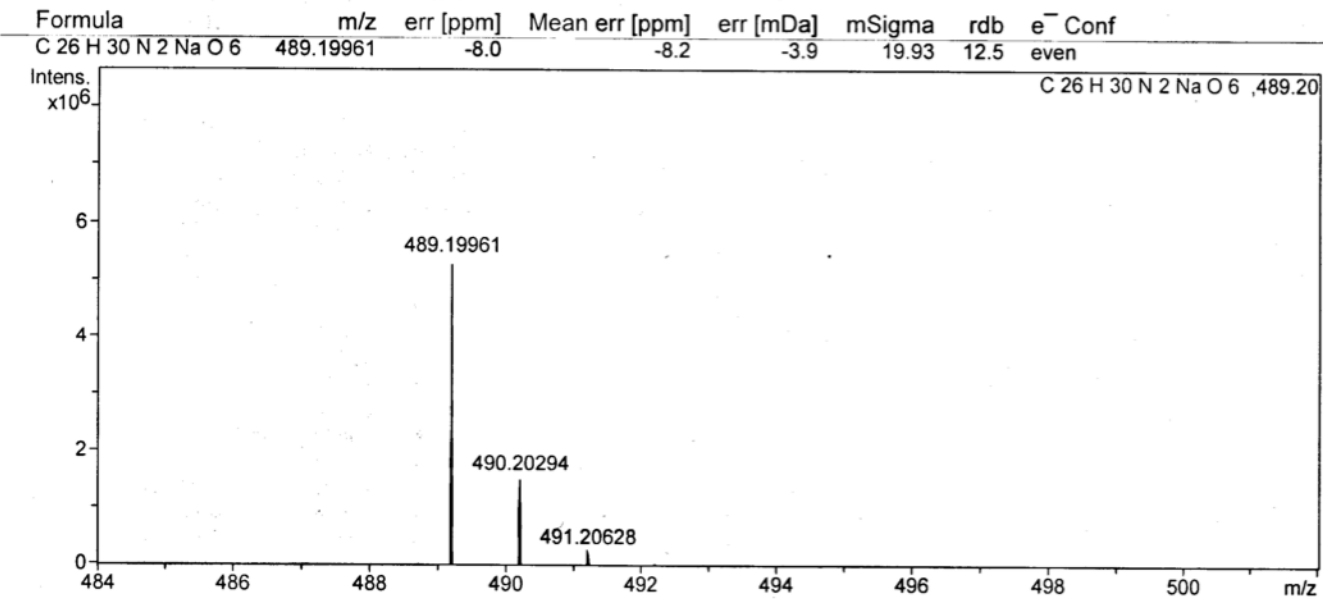

**Compound 6**

39

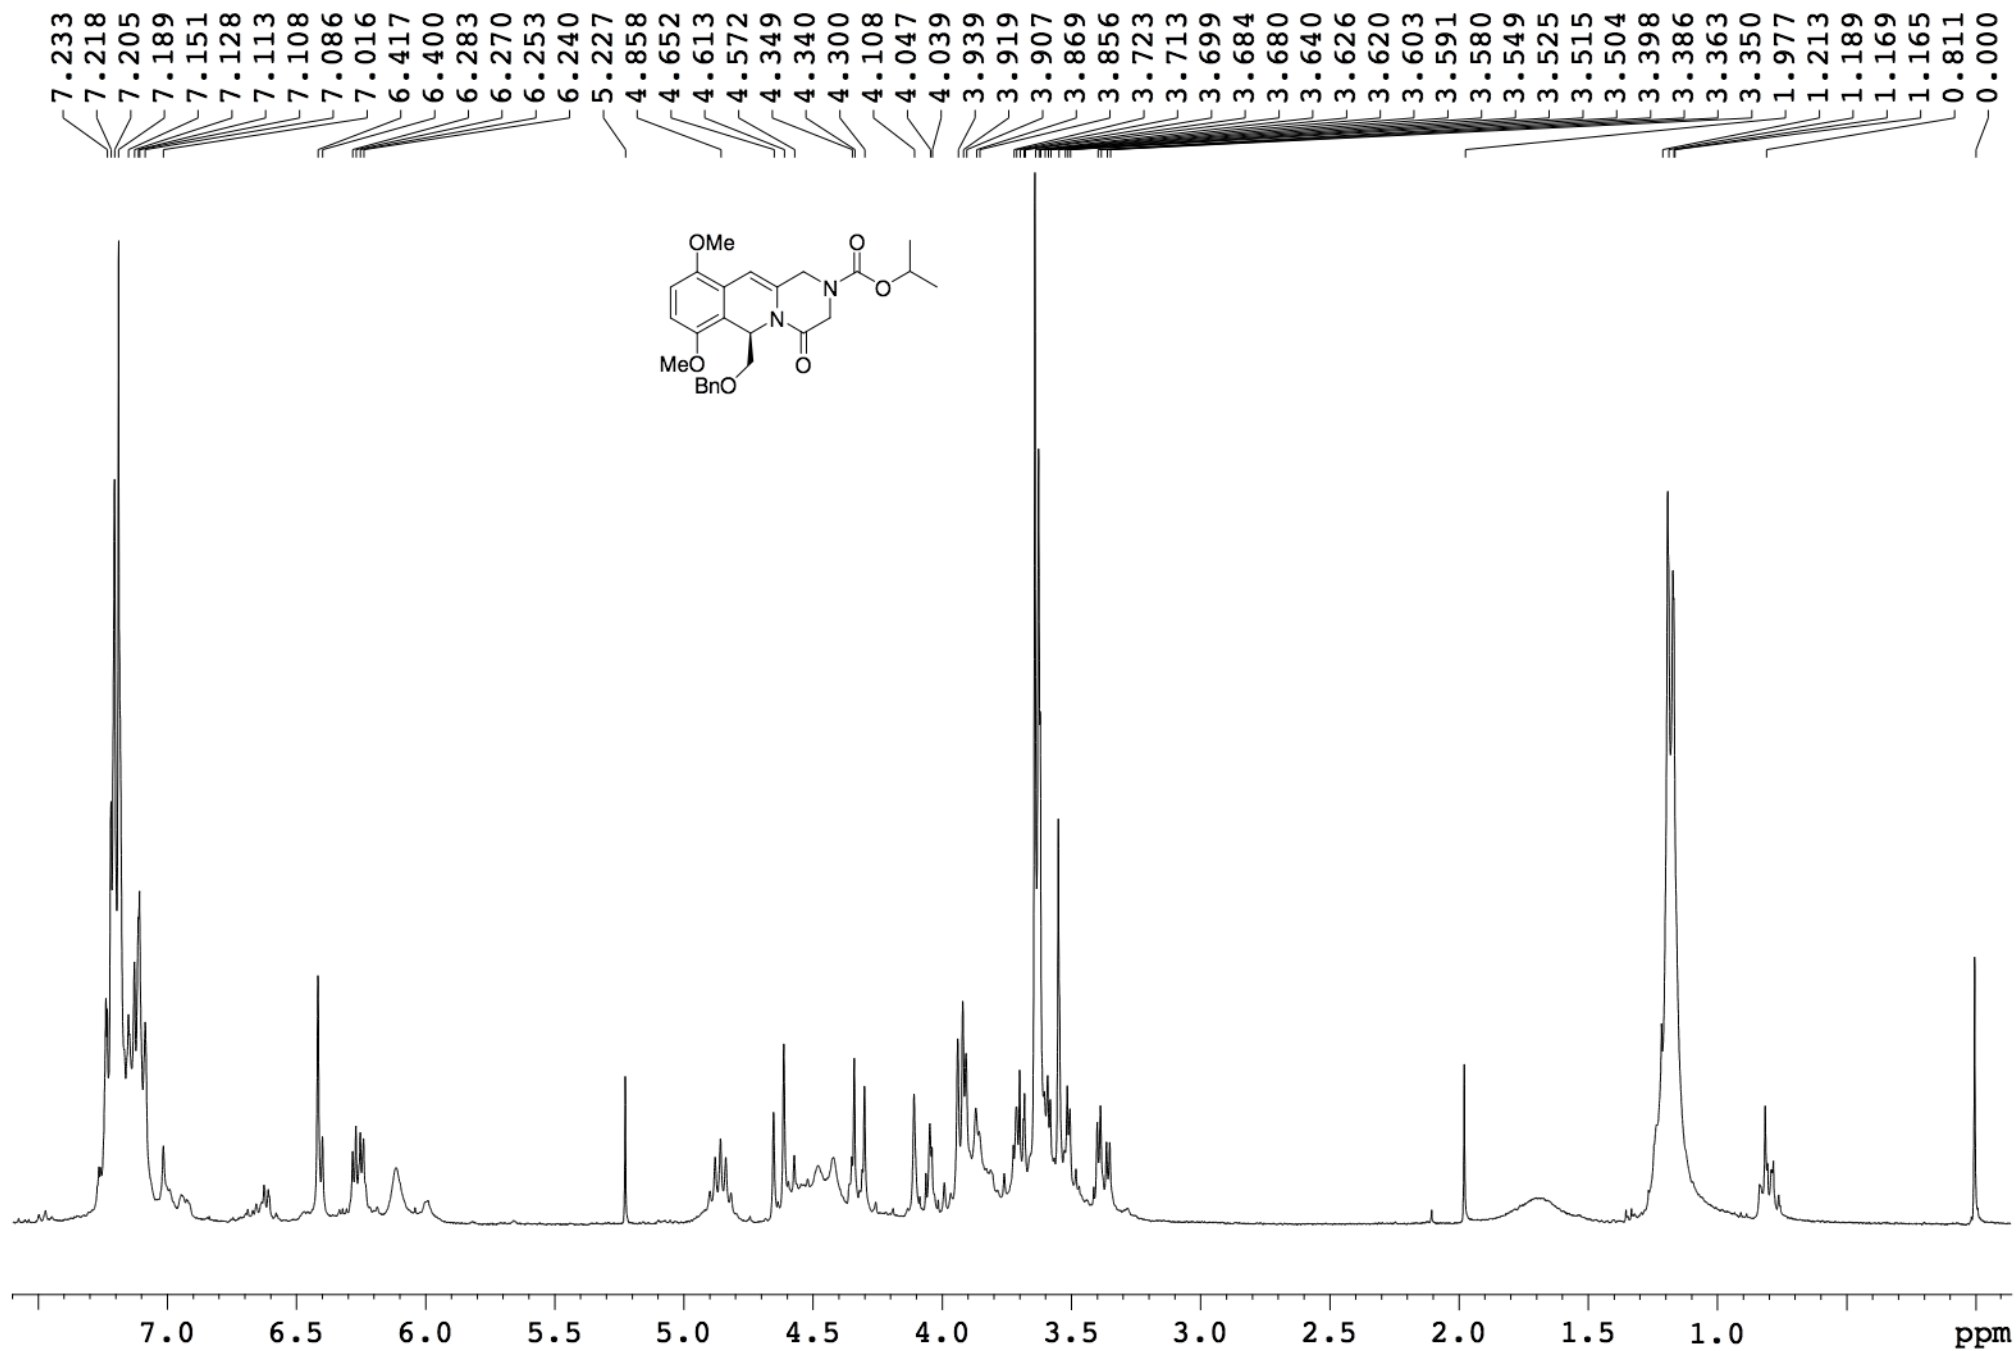

**Compound 6**

40

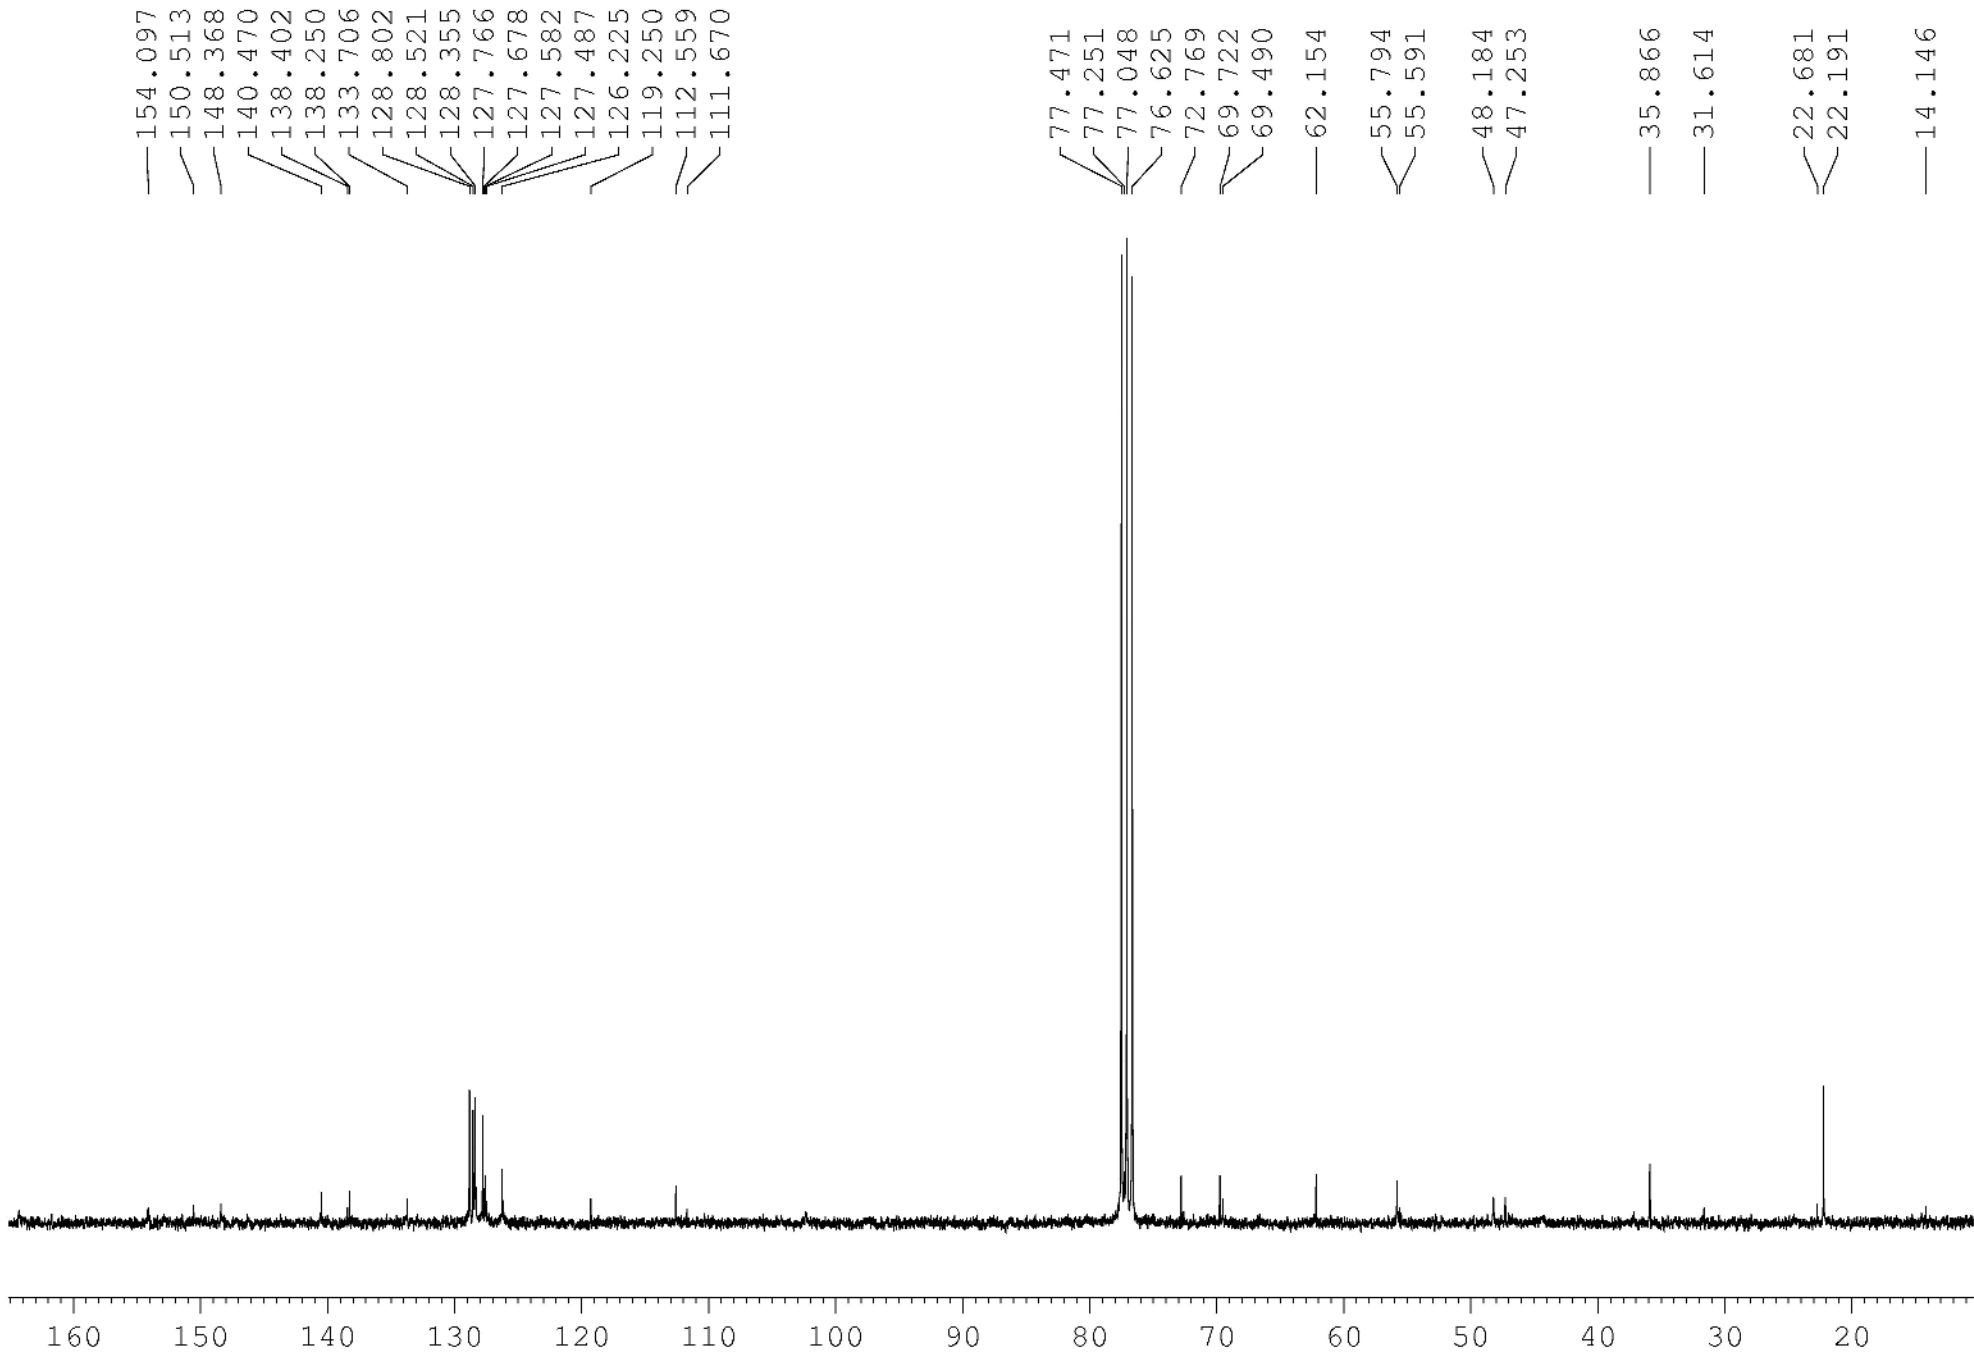

Compound 7b

41

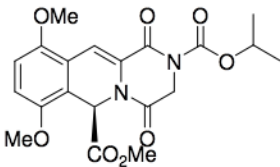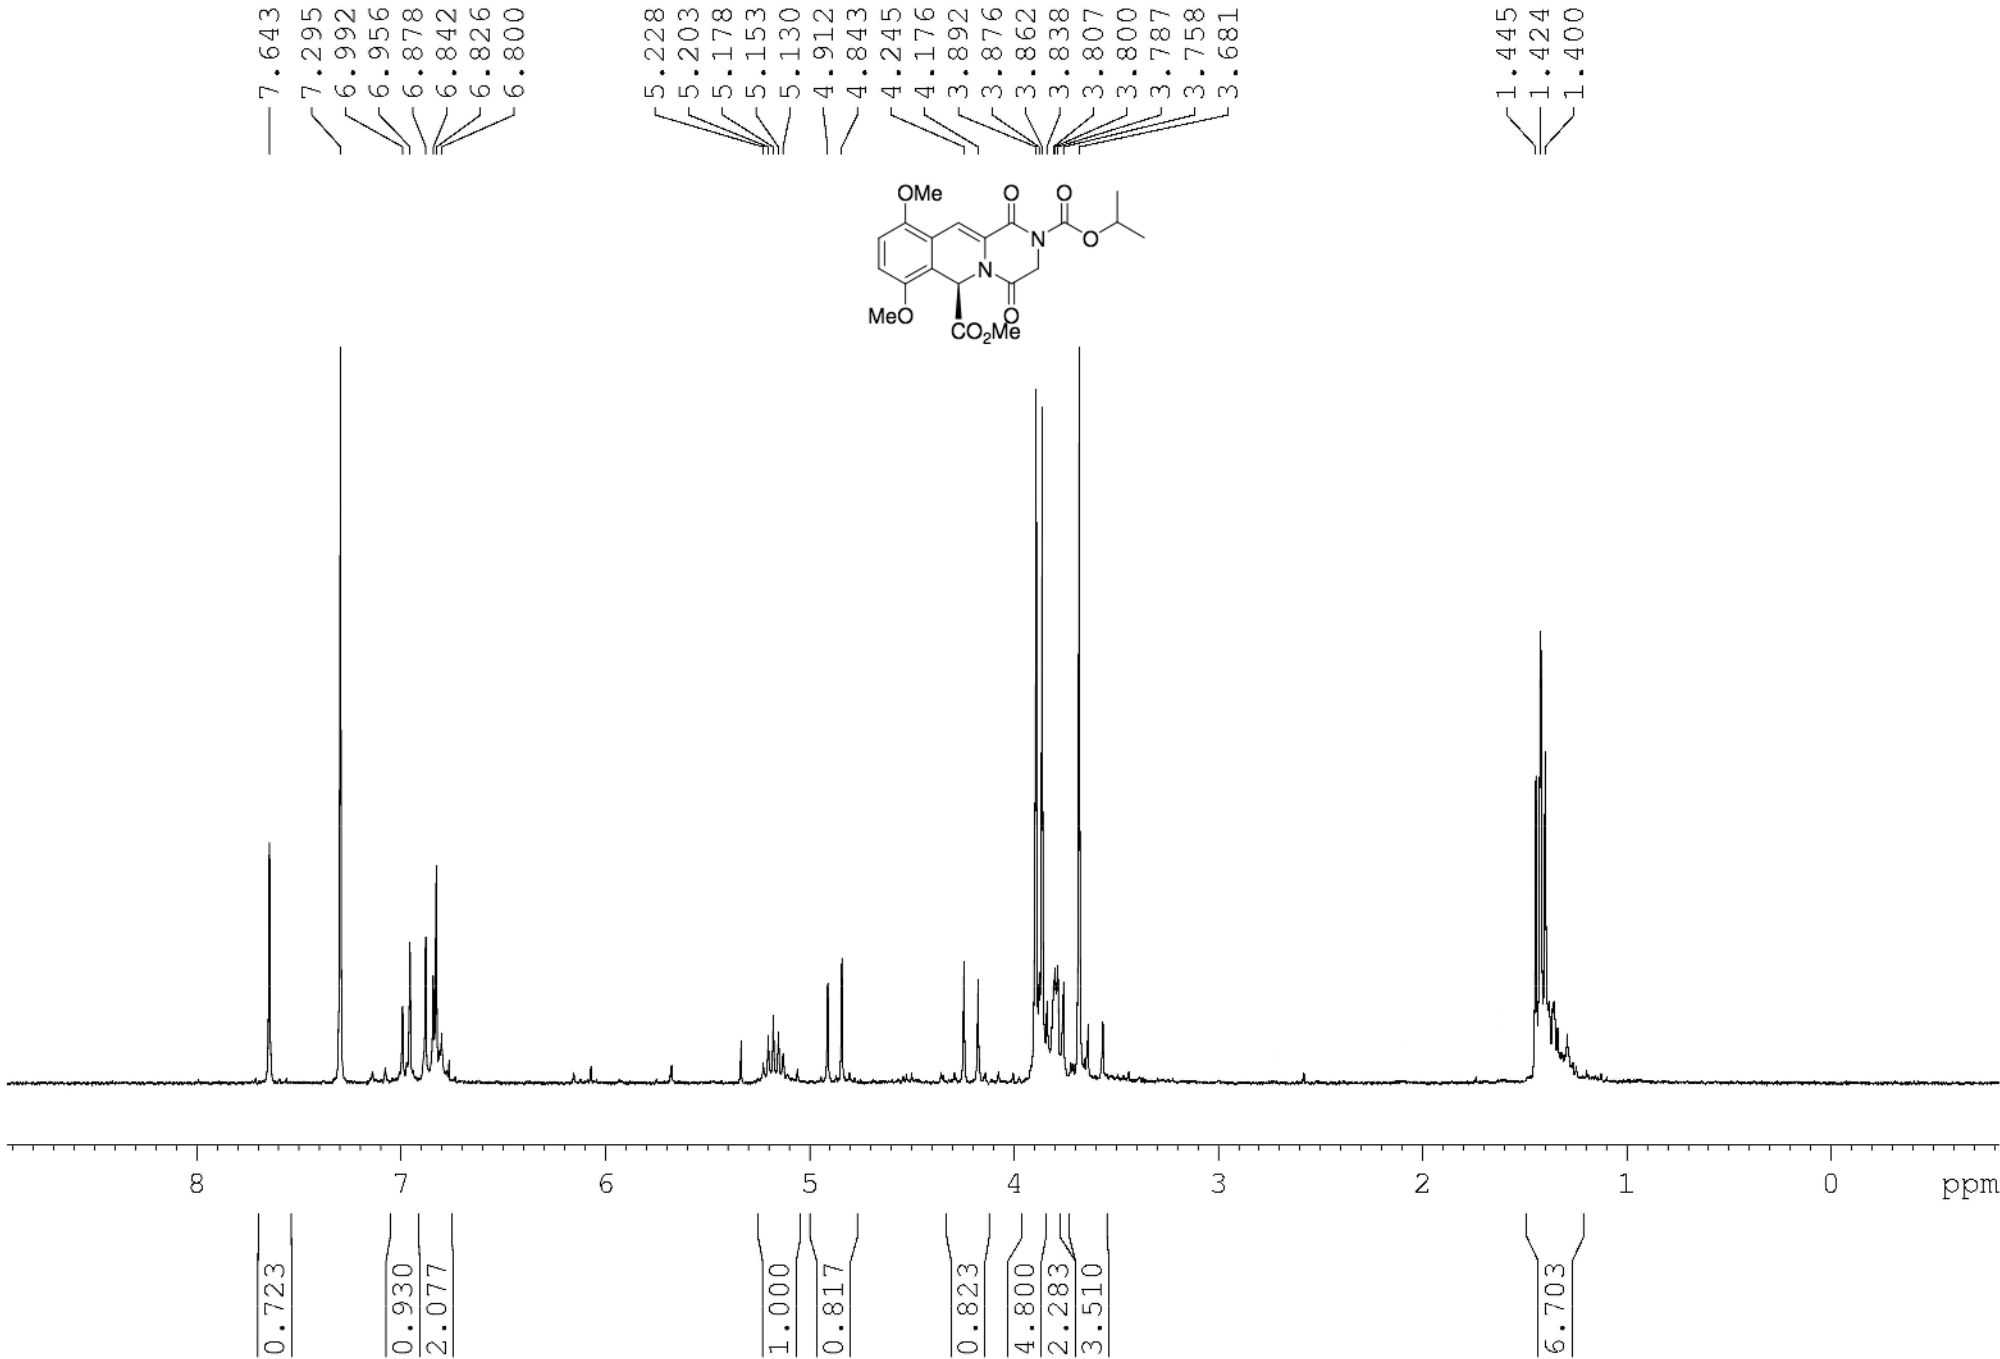

Compound 7b

42

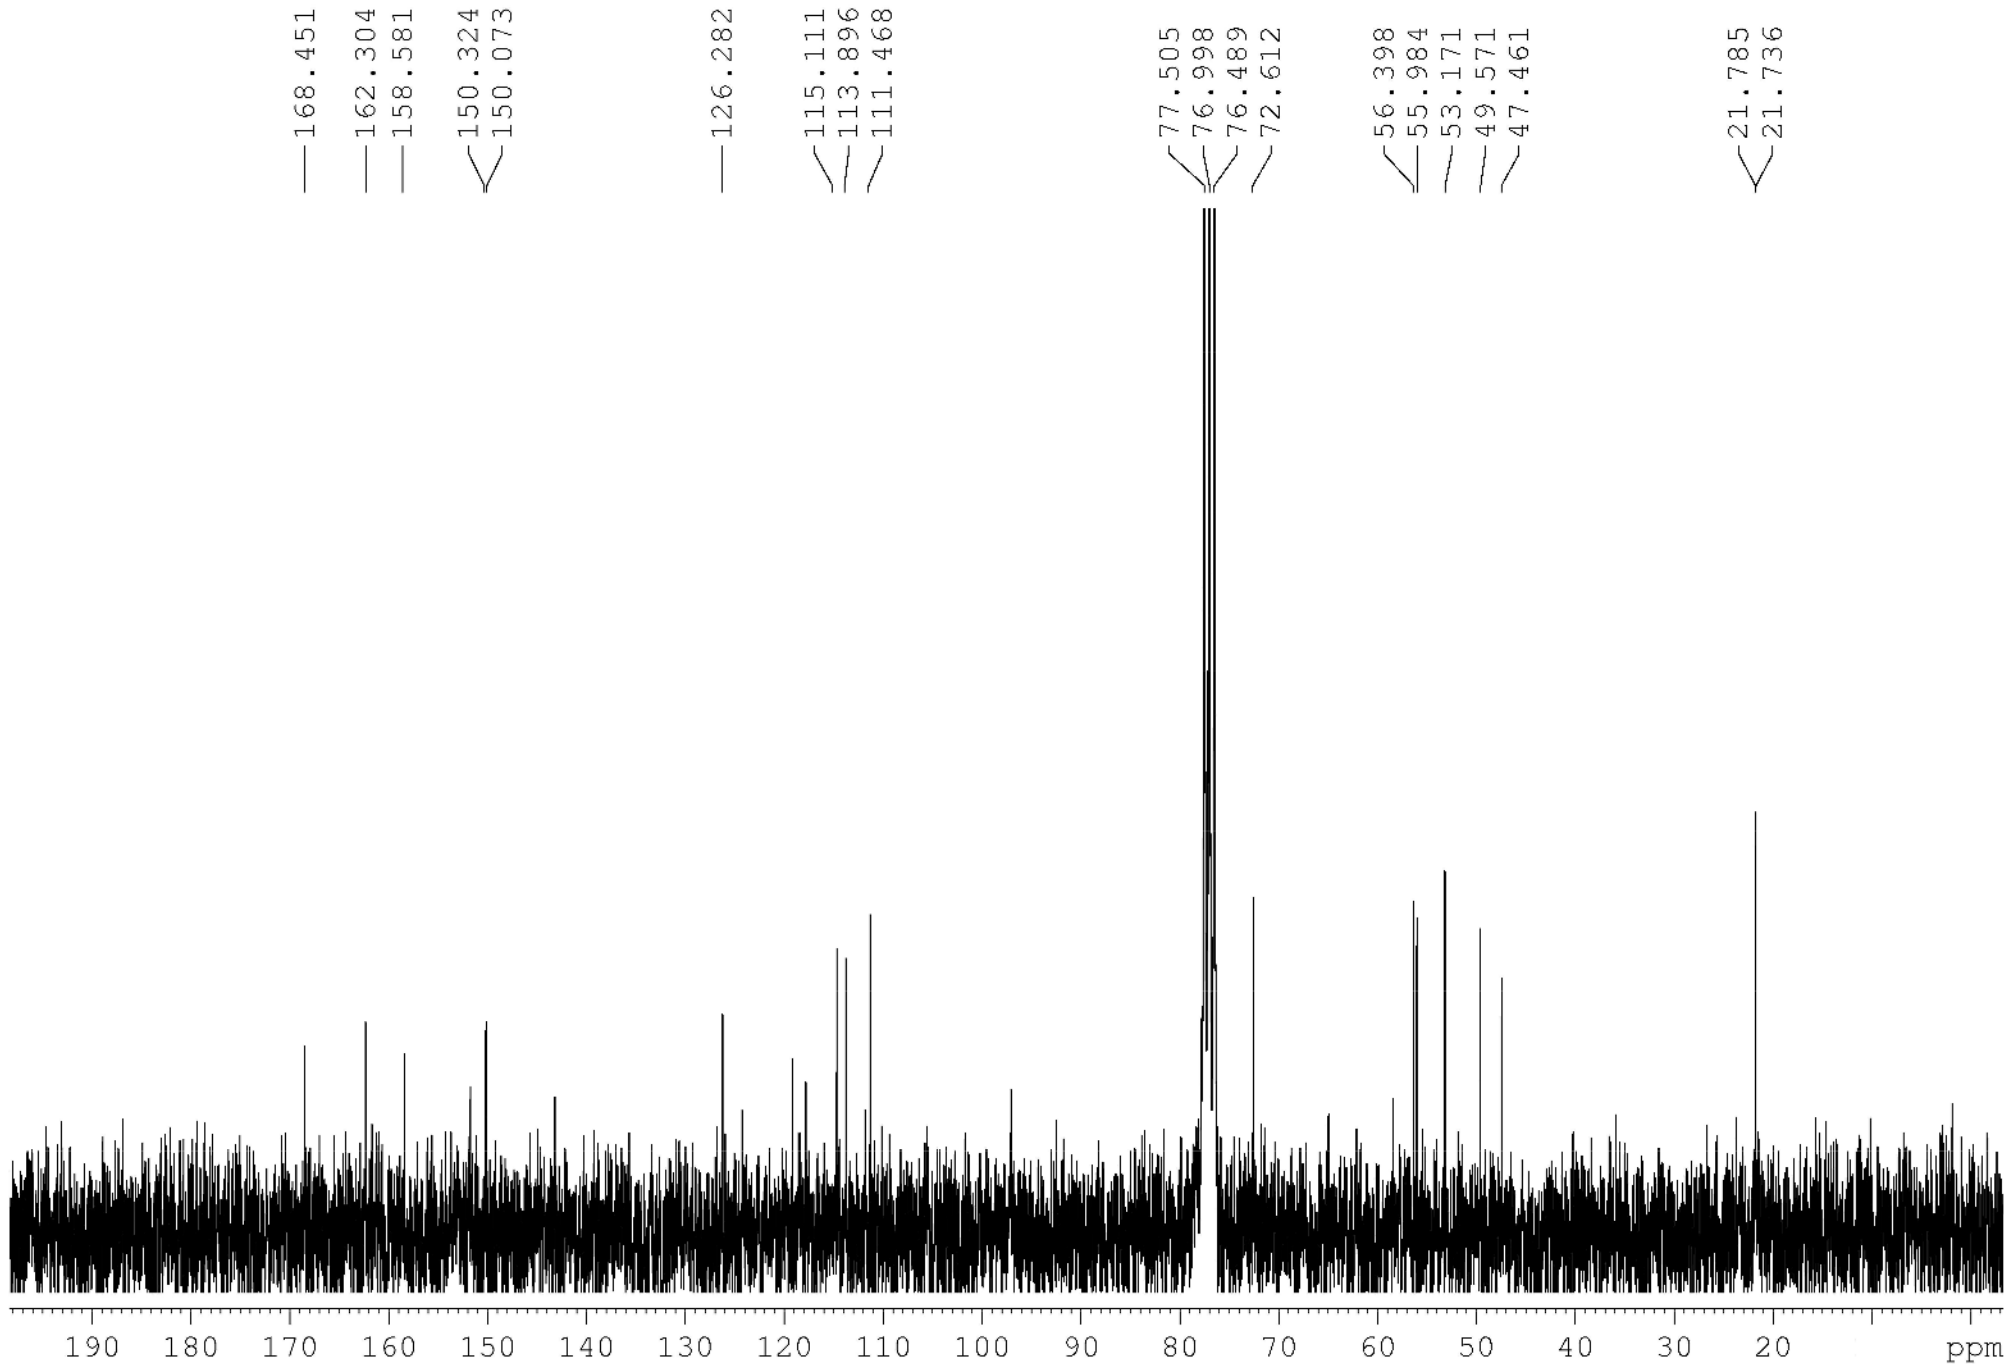

**Compound 7d**

43

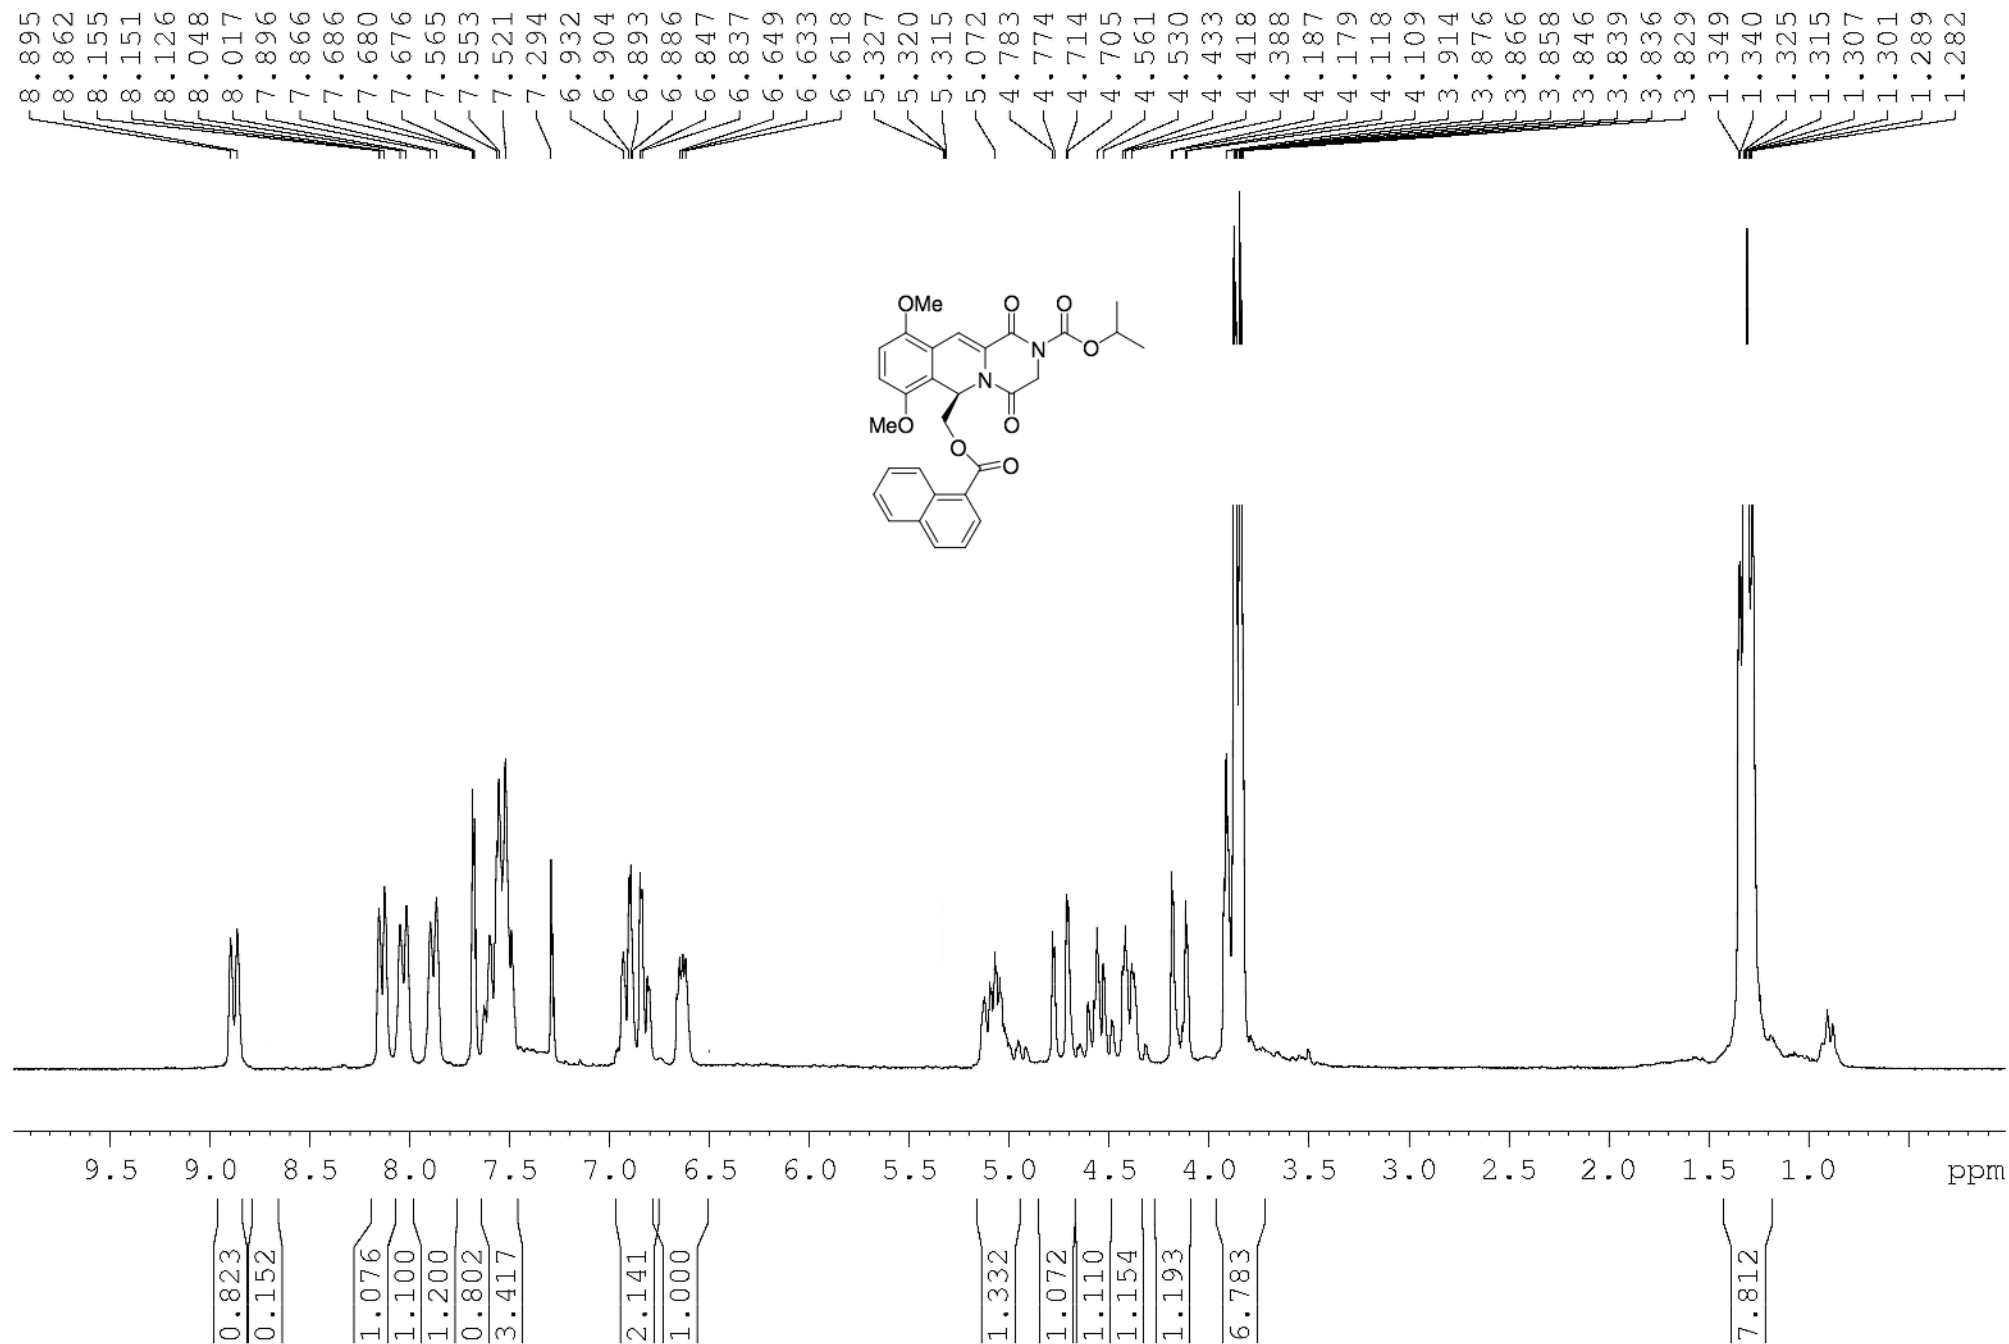



Compound 7d

44

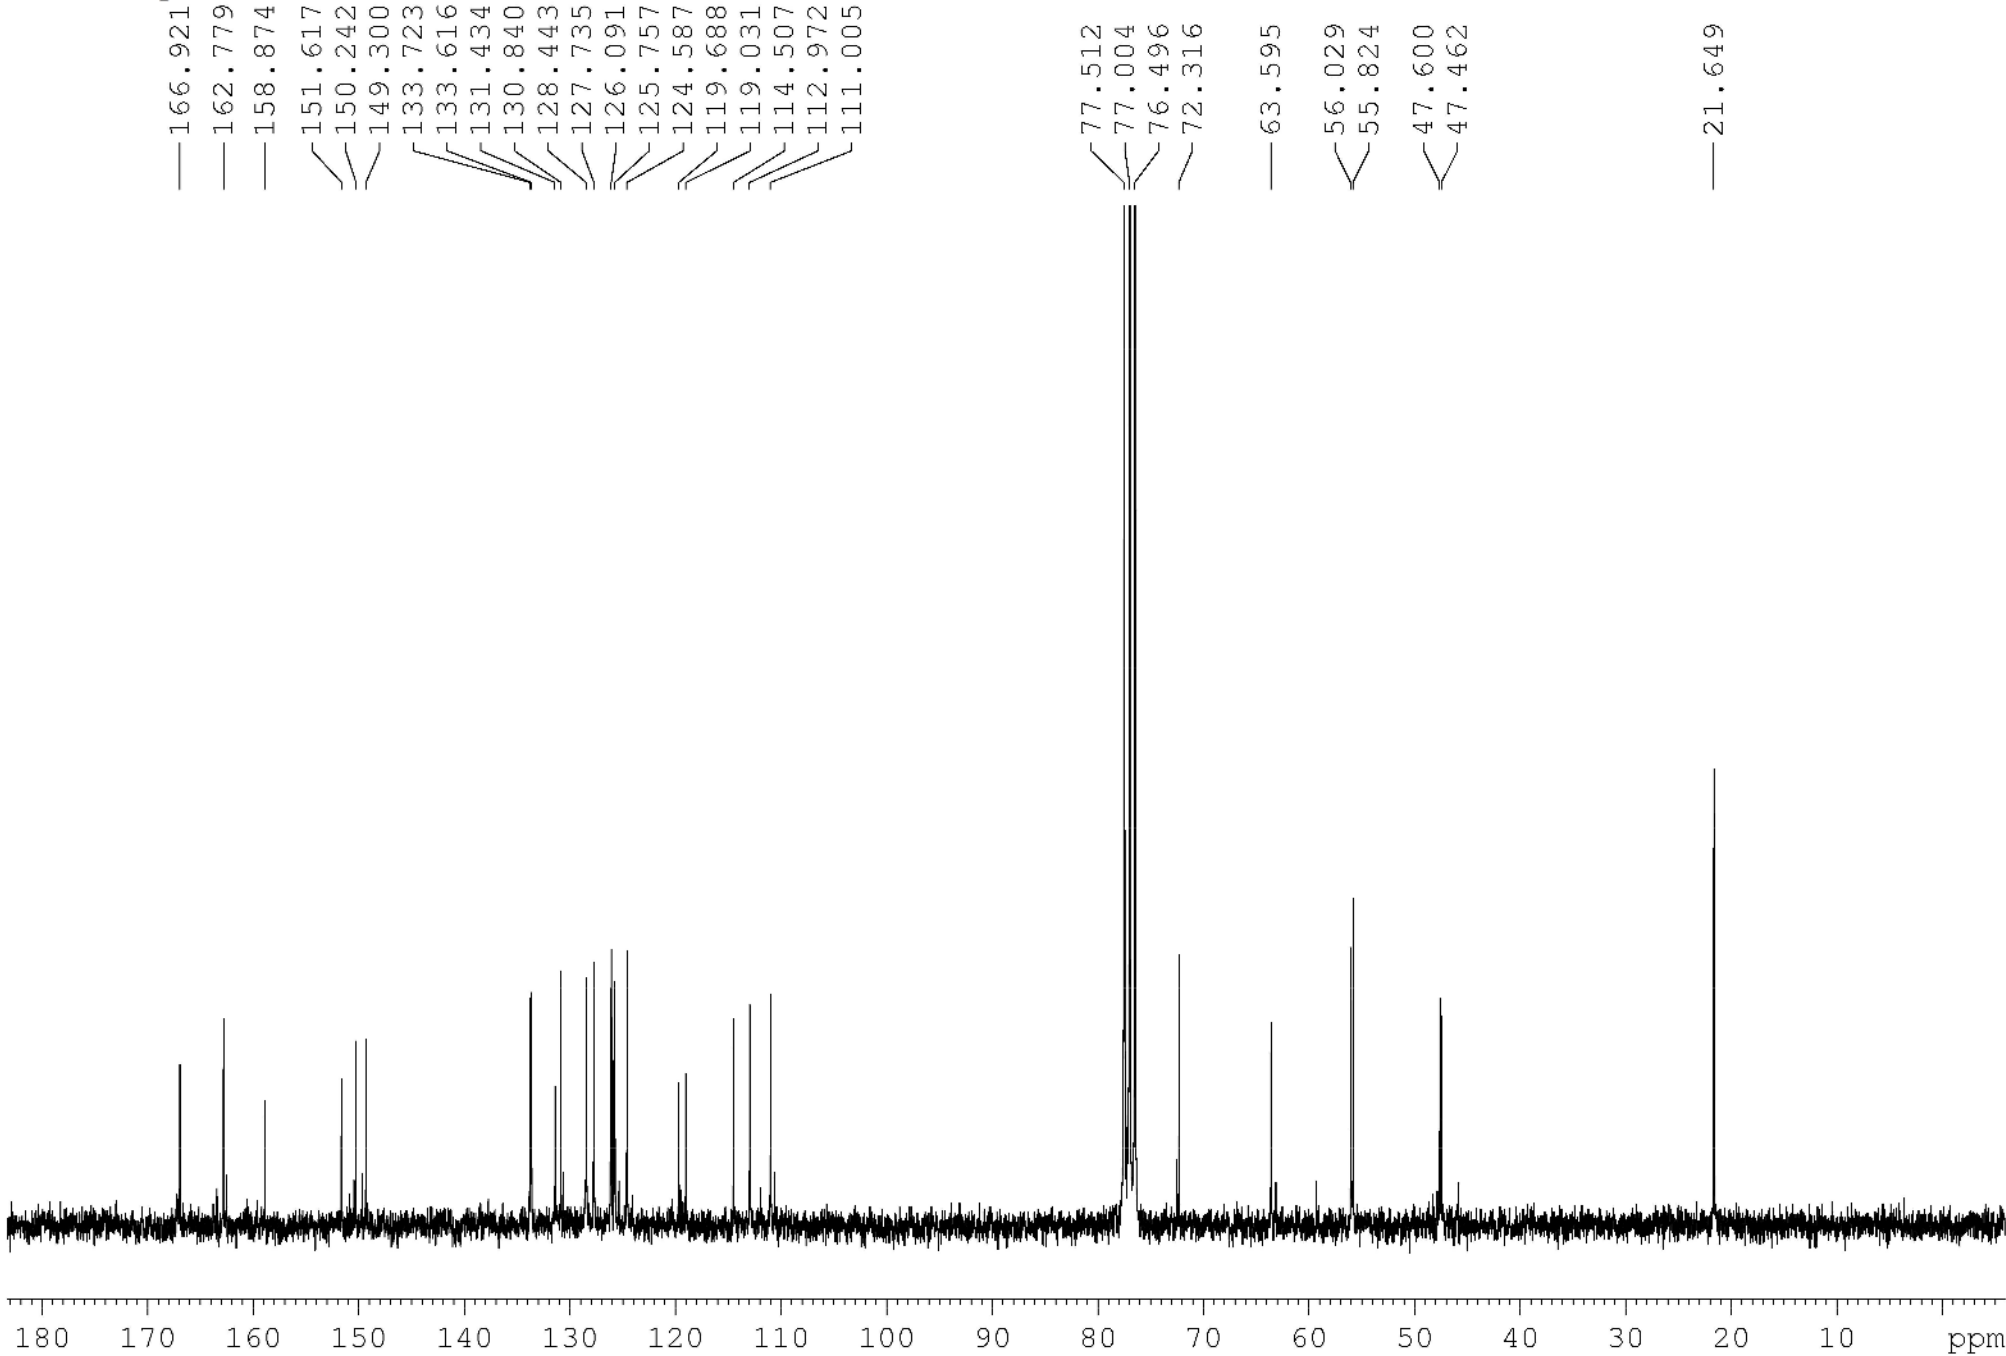

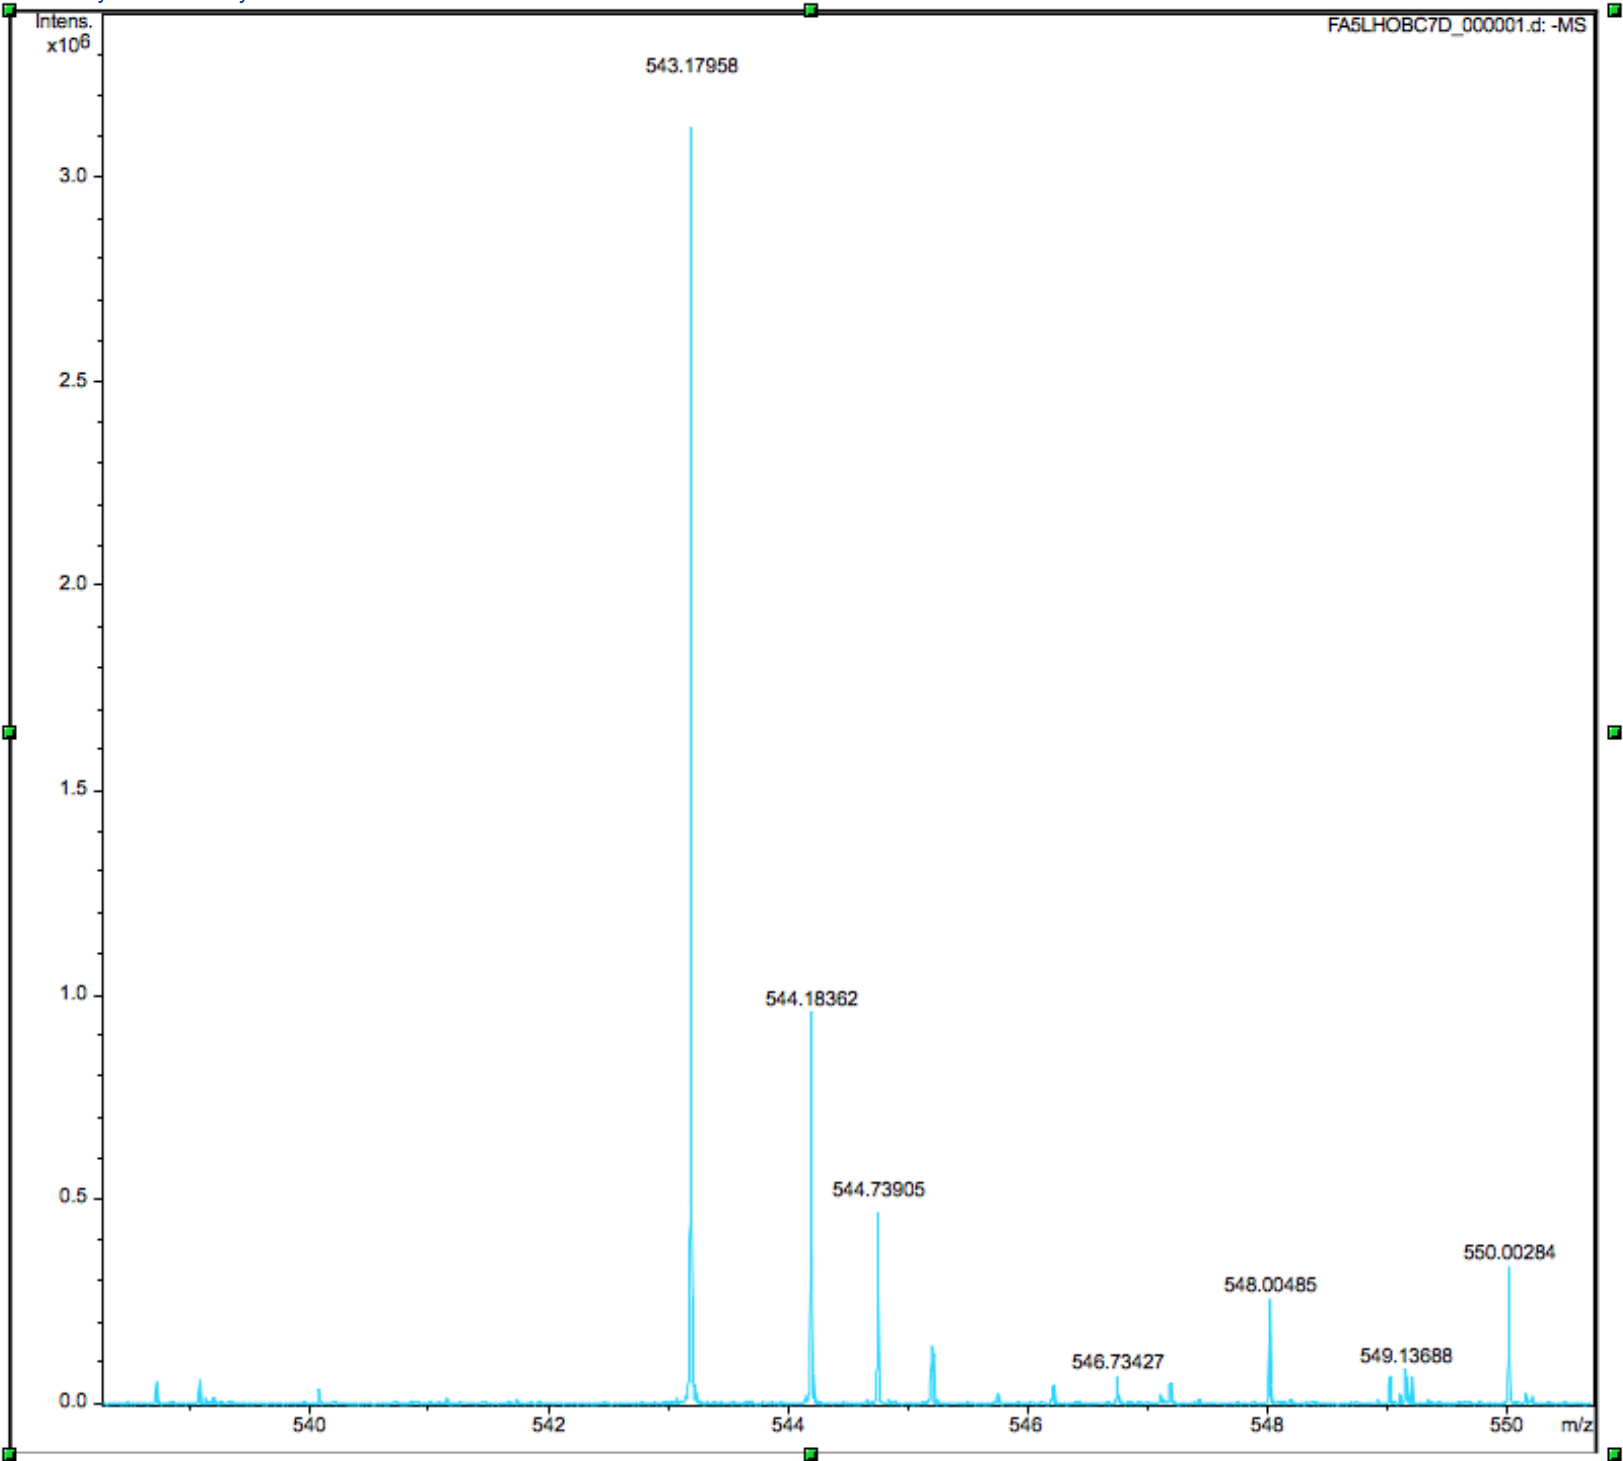

**Compound 8a**

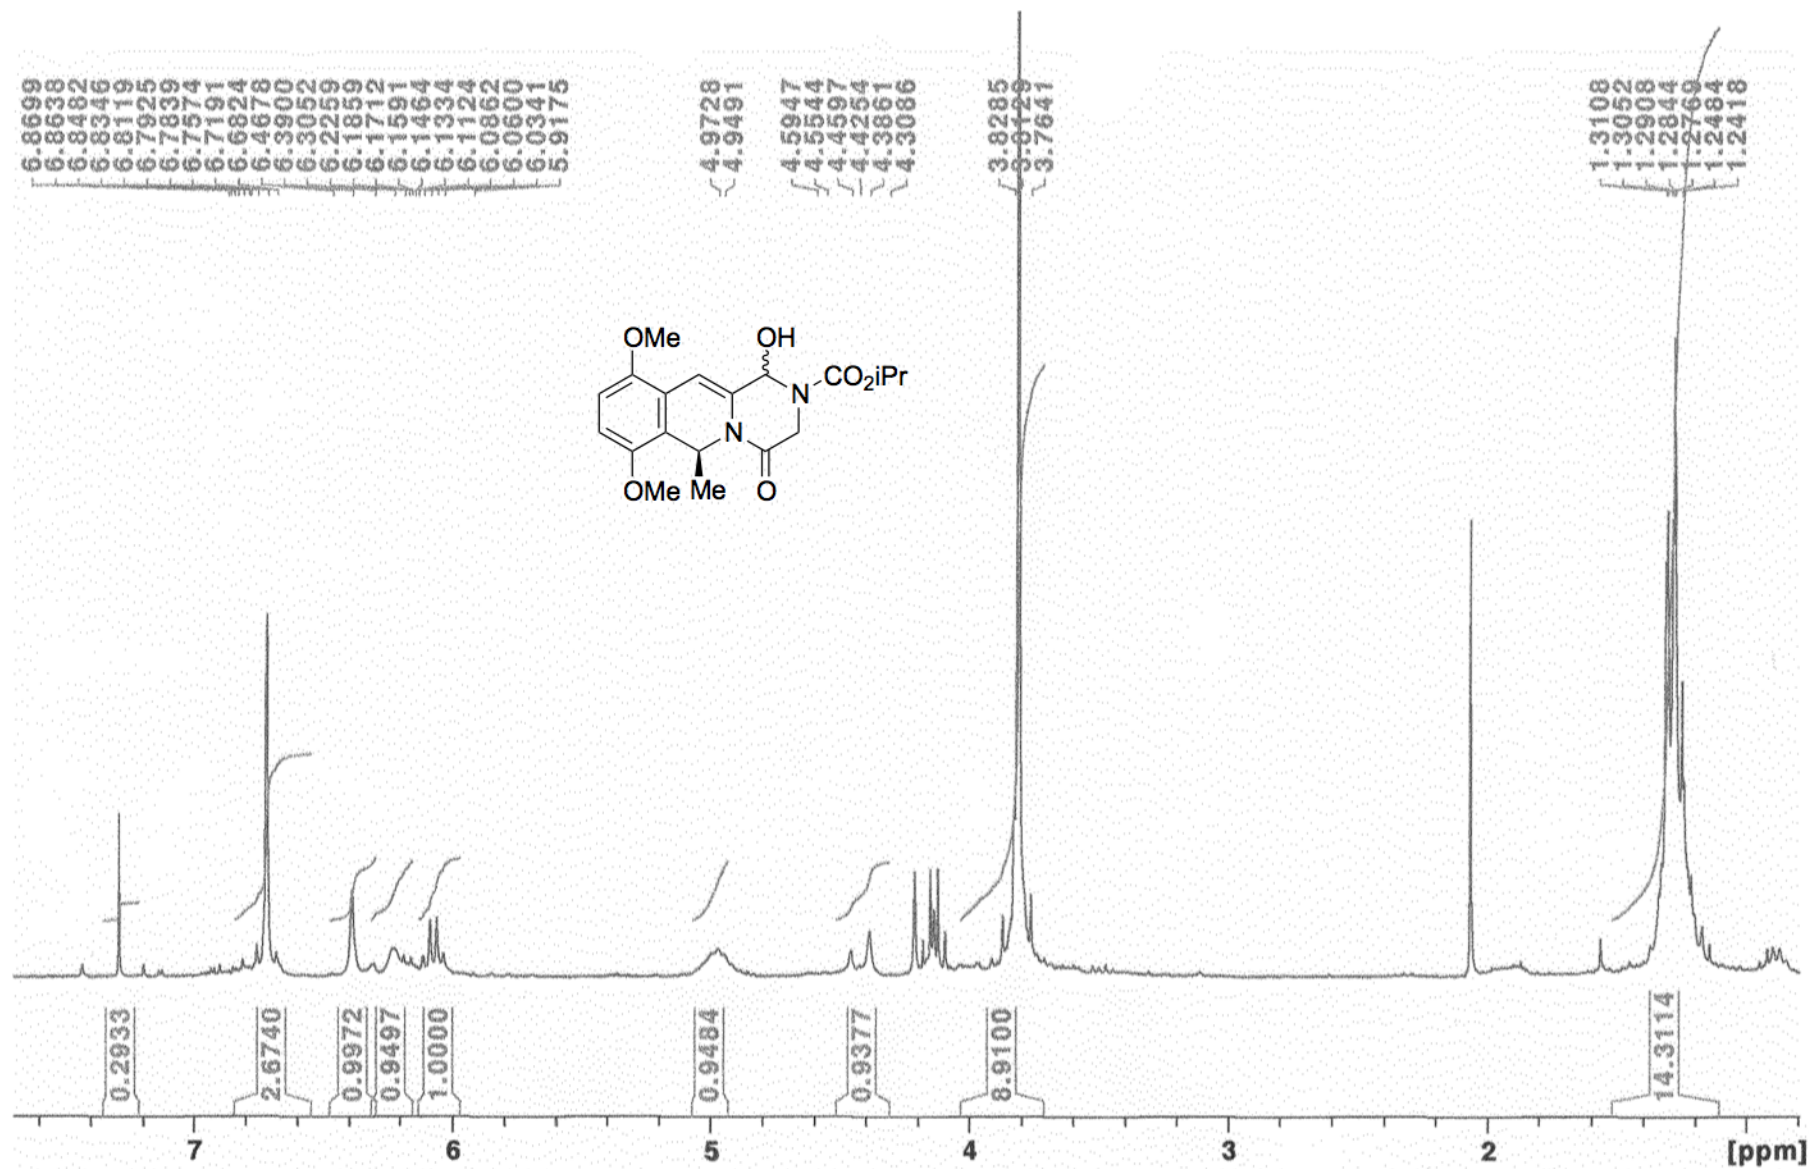

Compound 8a

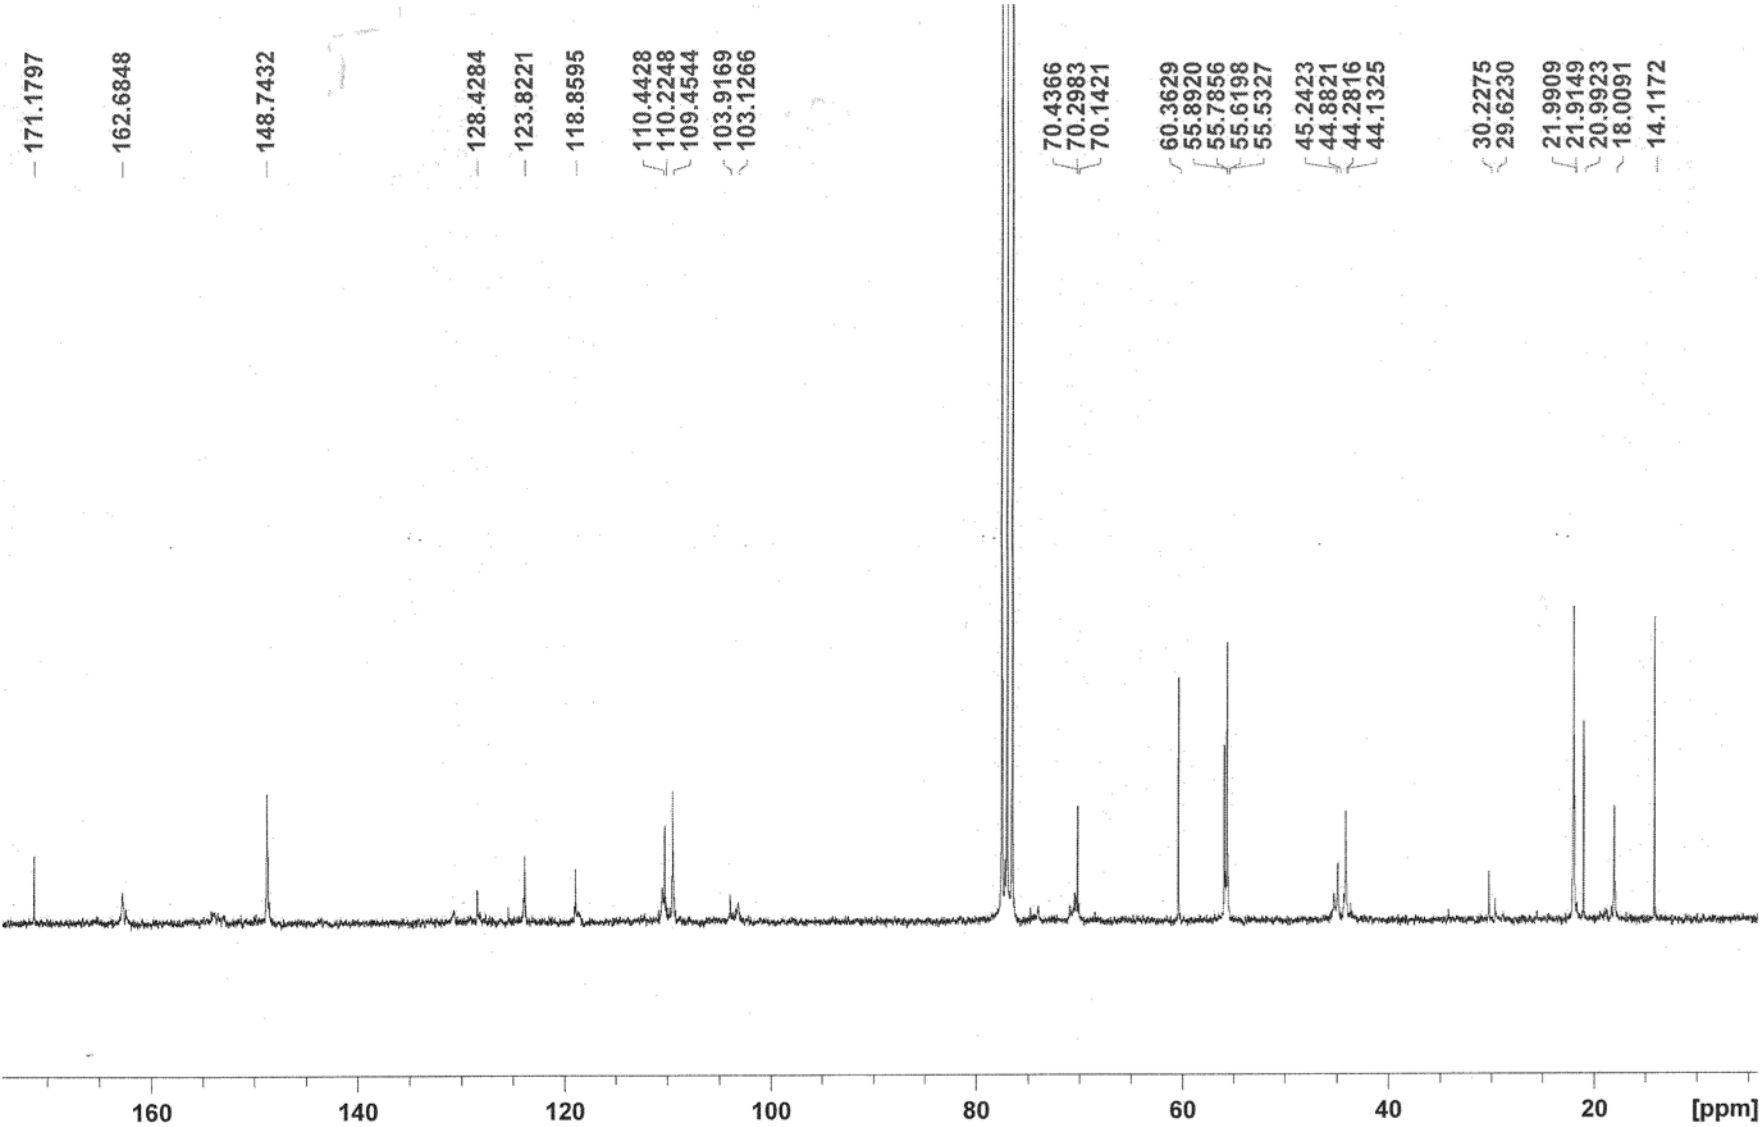

Compound 8a

HRMS

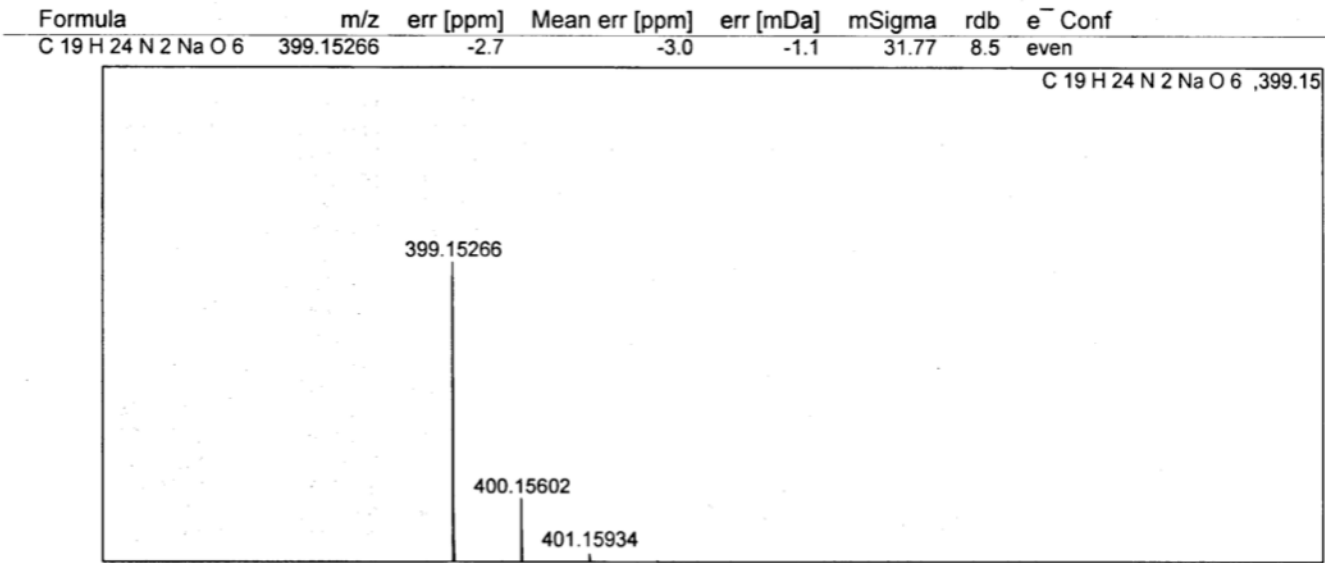

Compound 9

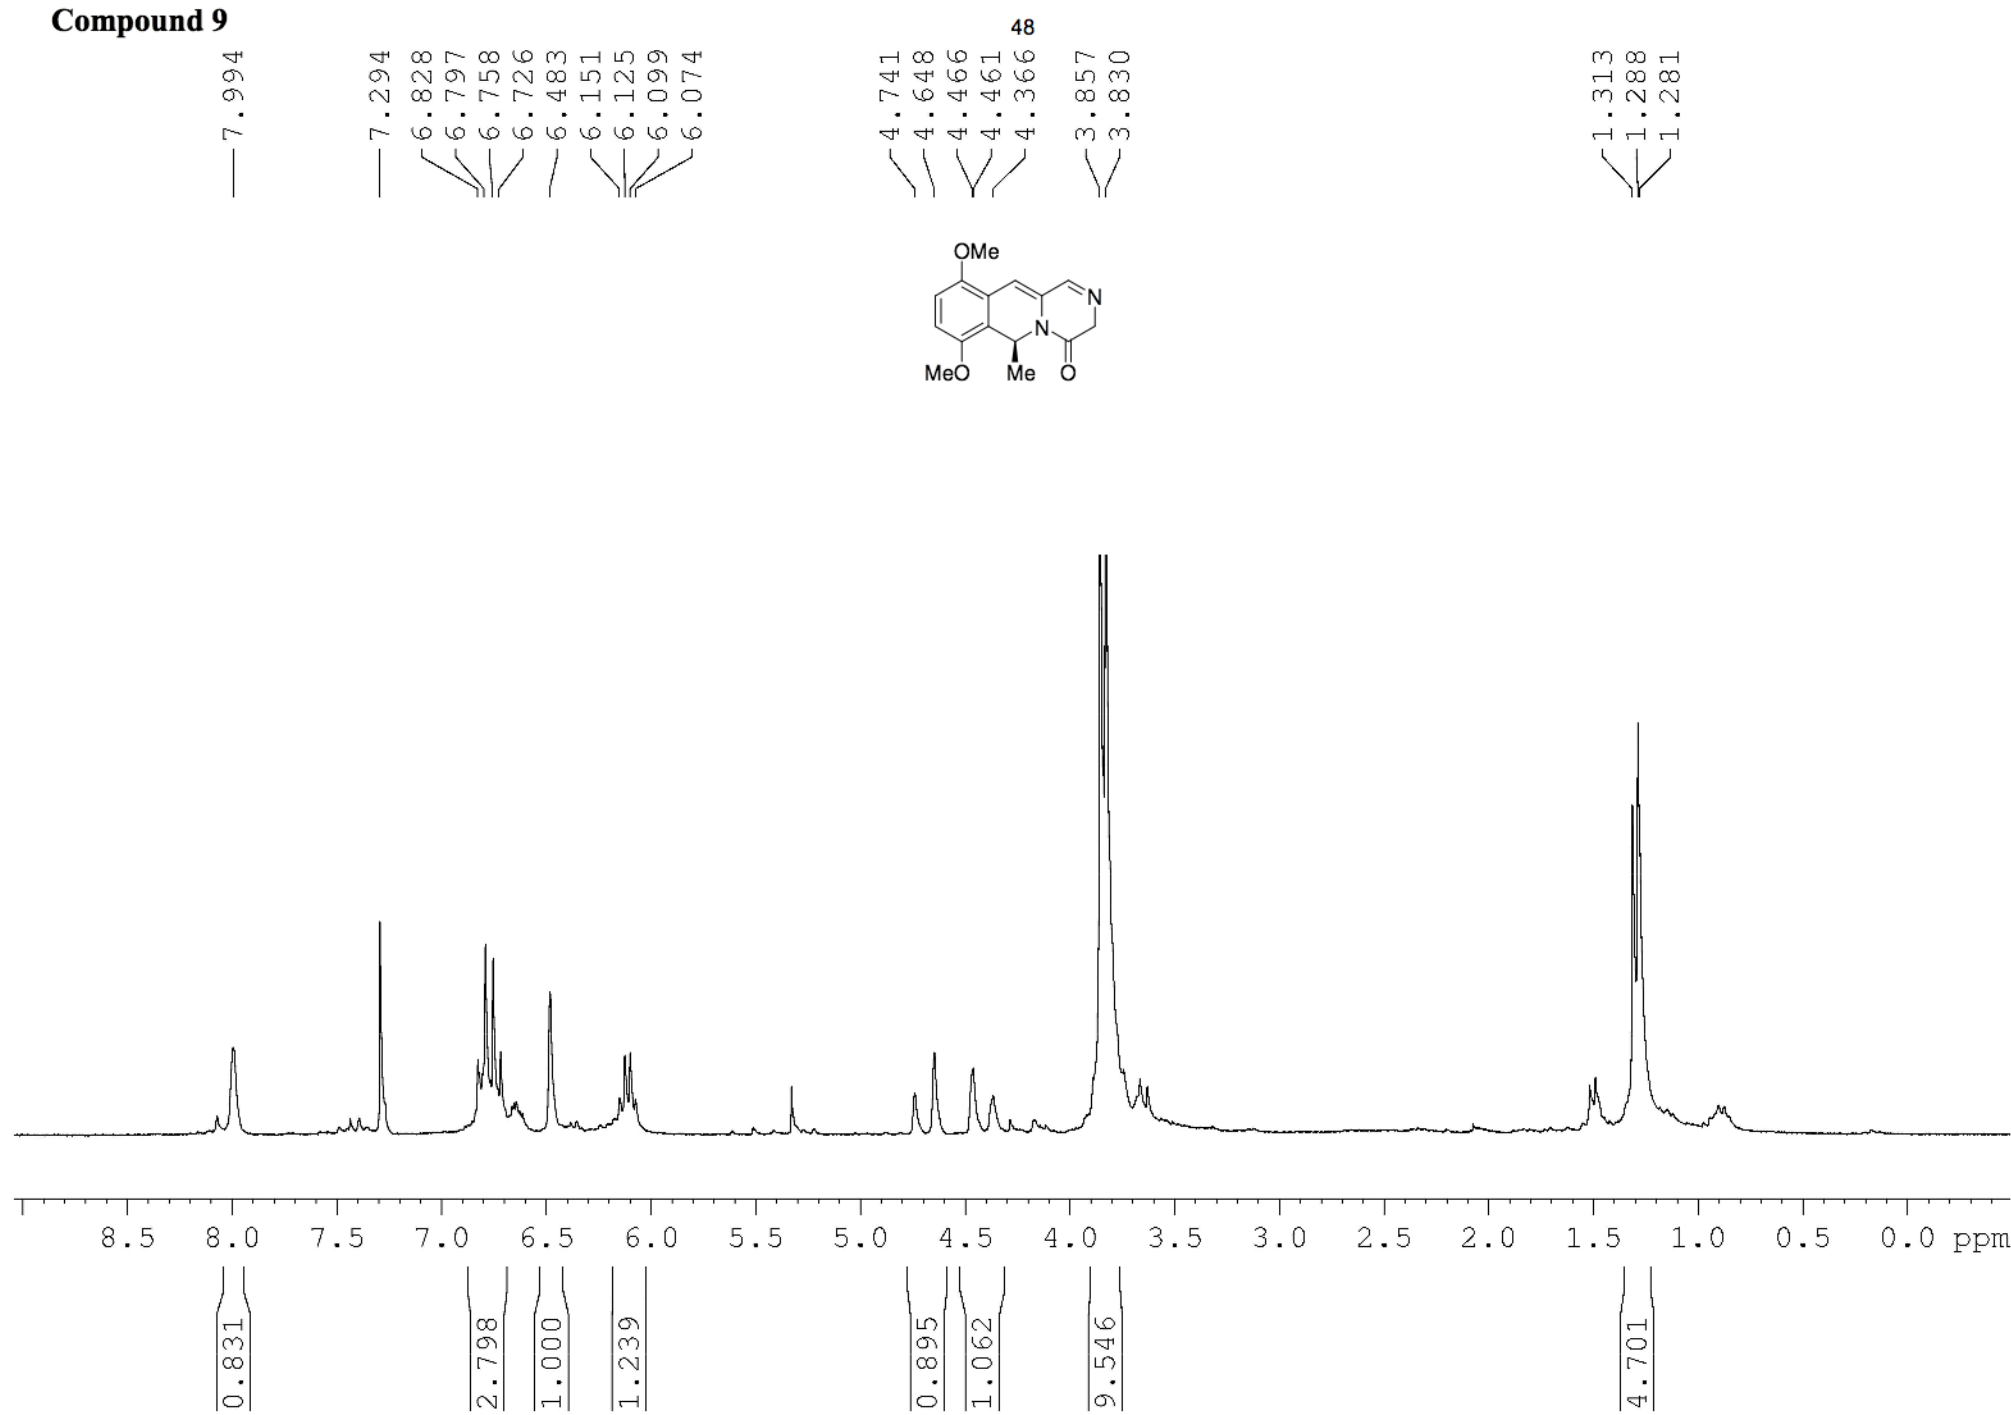

Compound 9

49

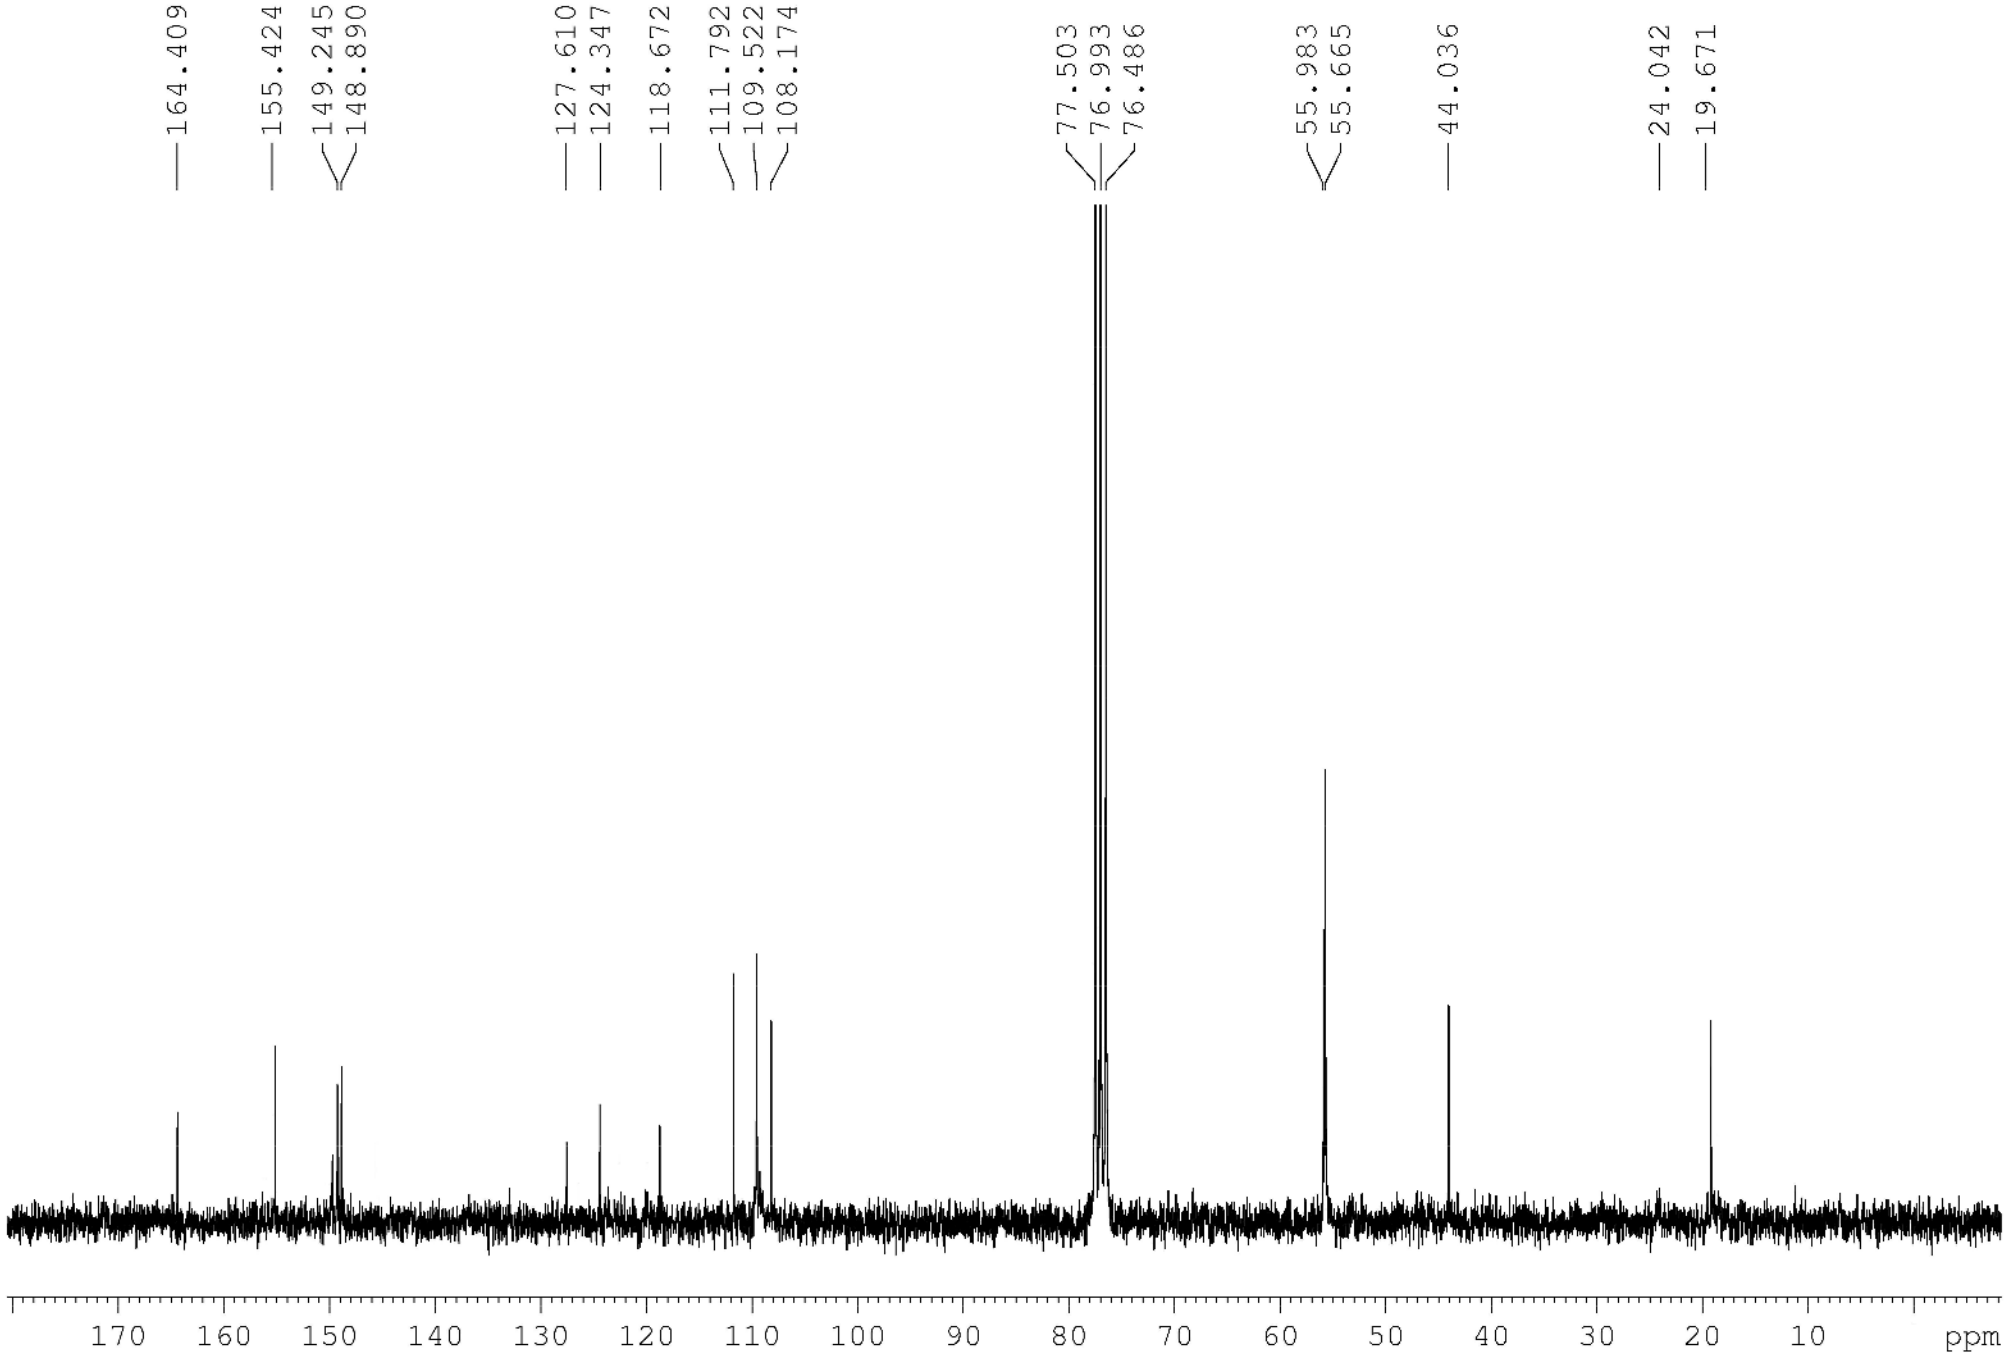

Compound 10

50

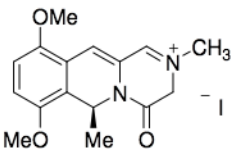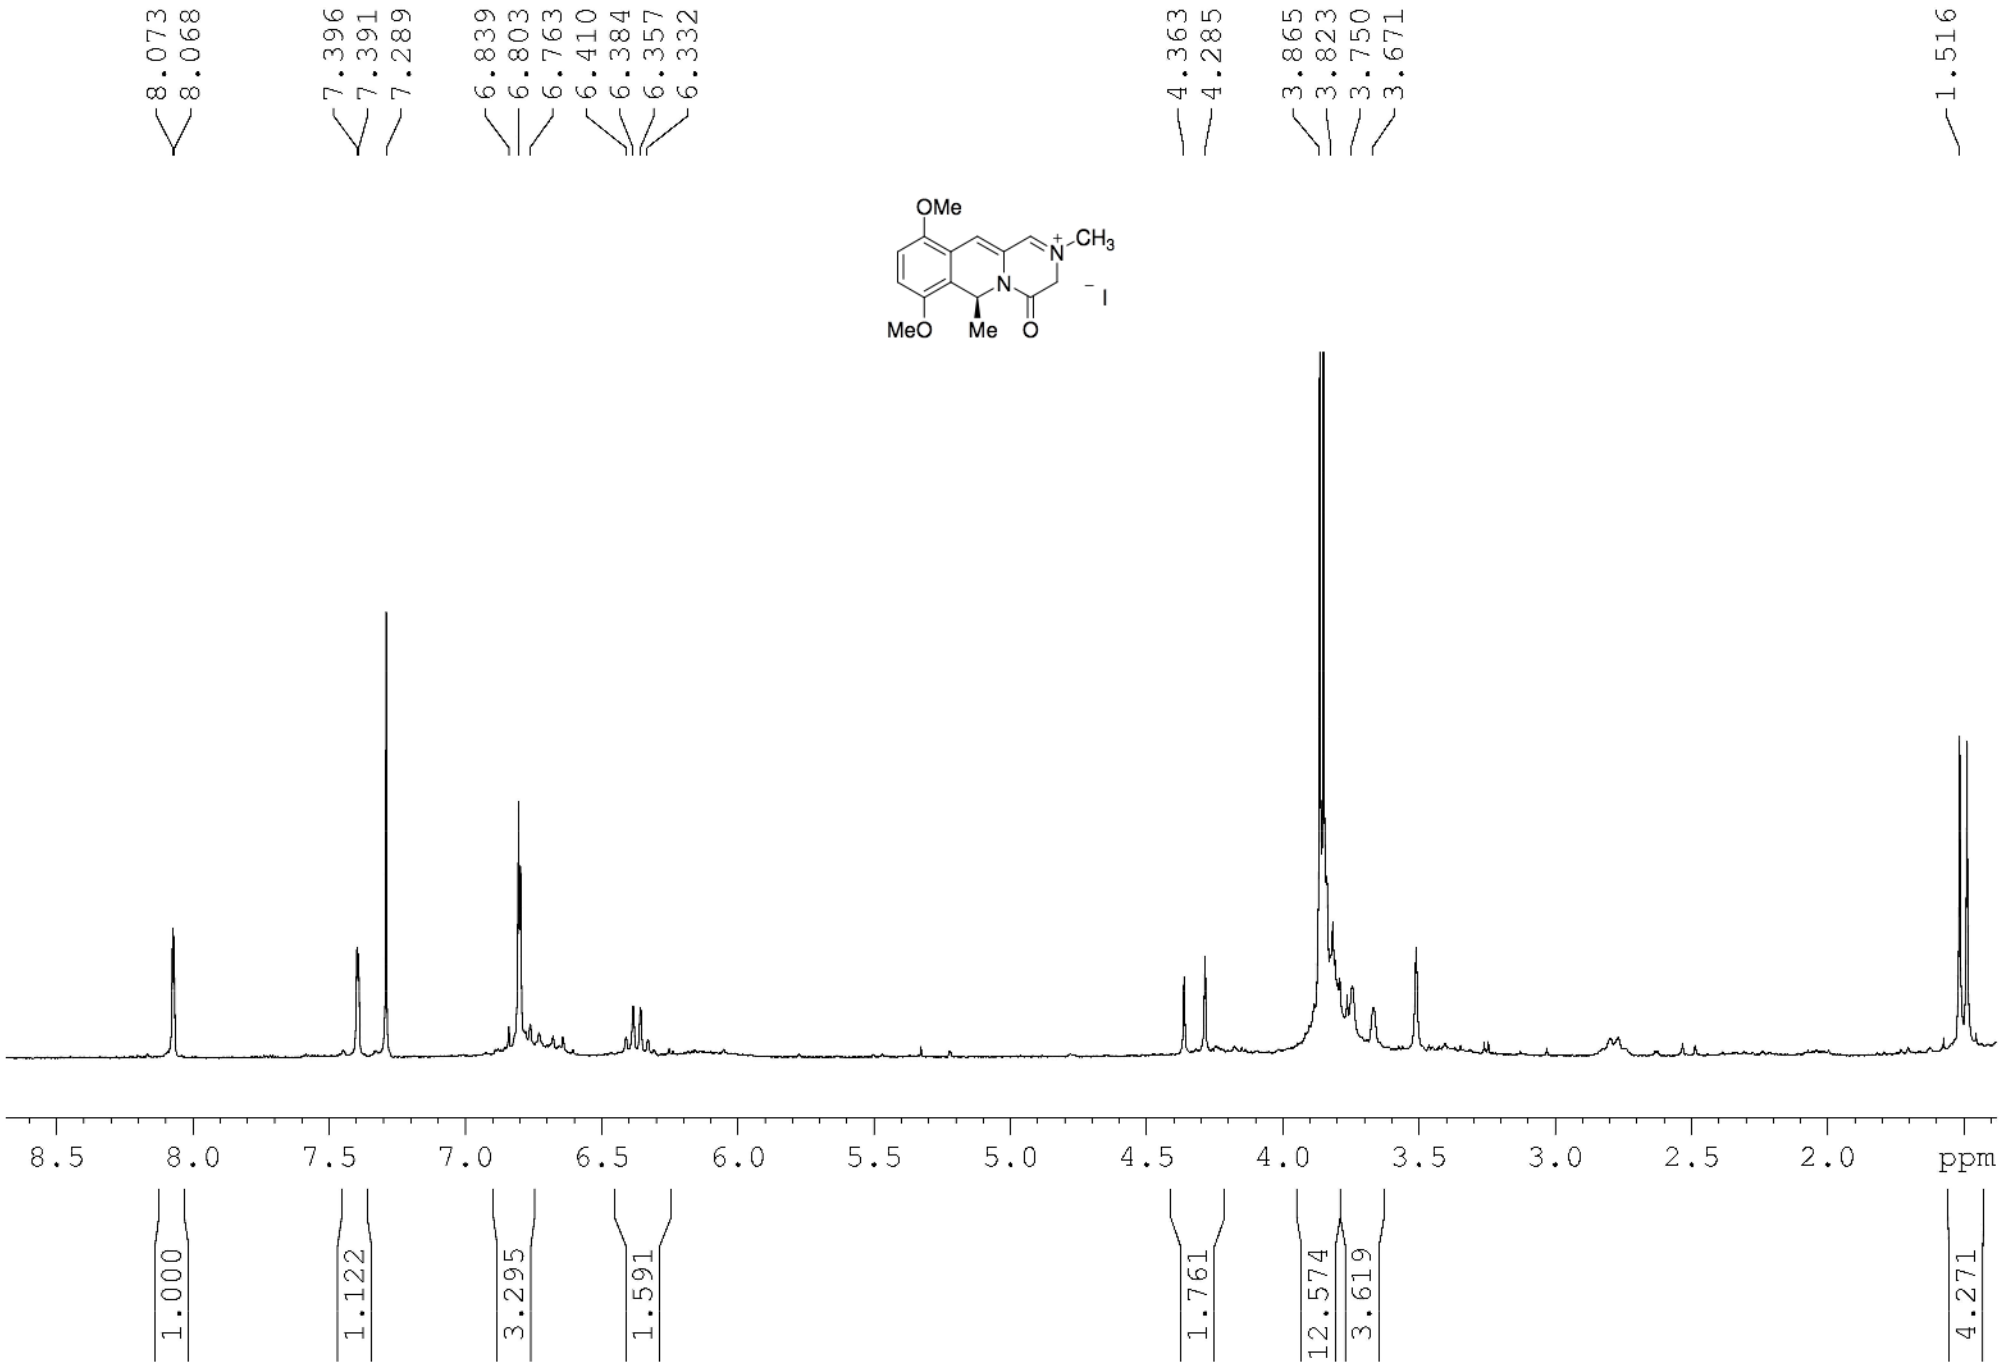



Compound 10

51

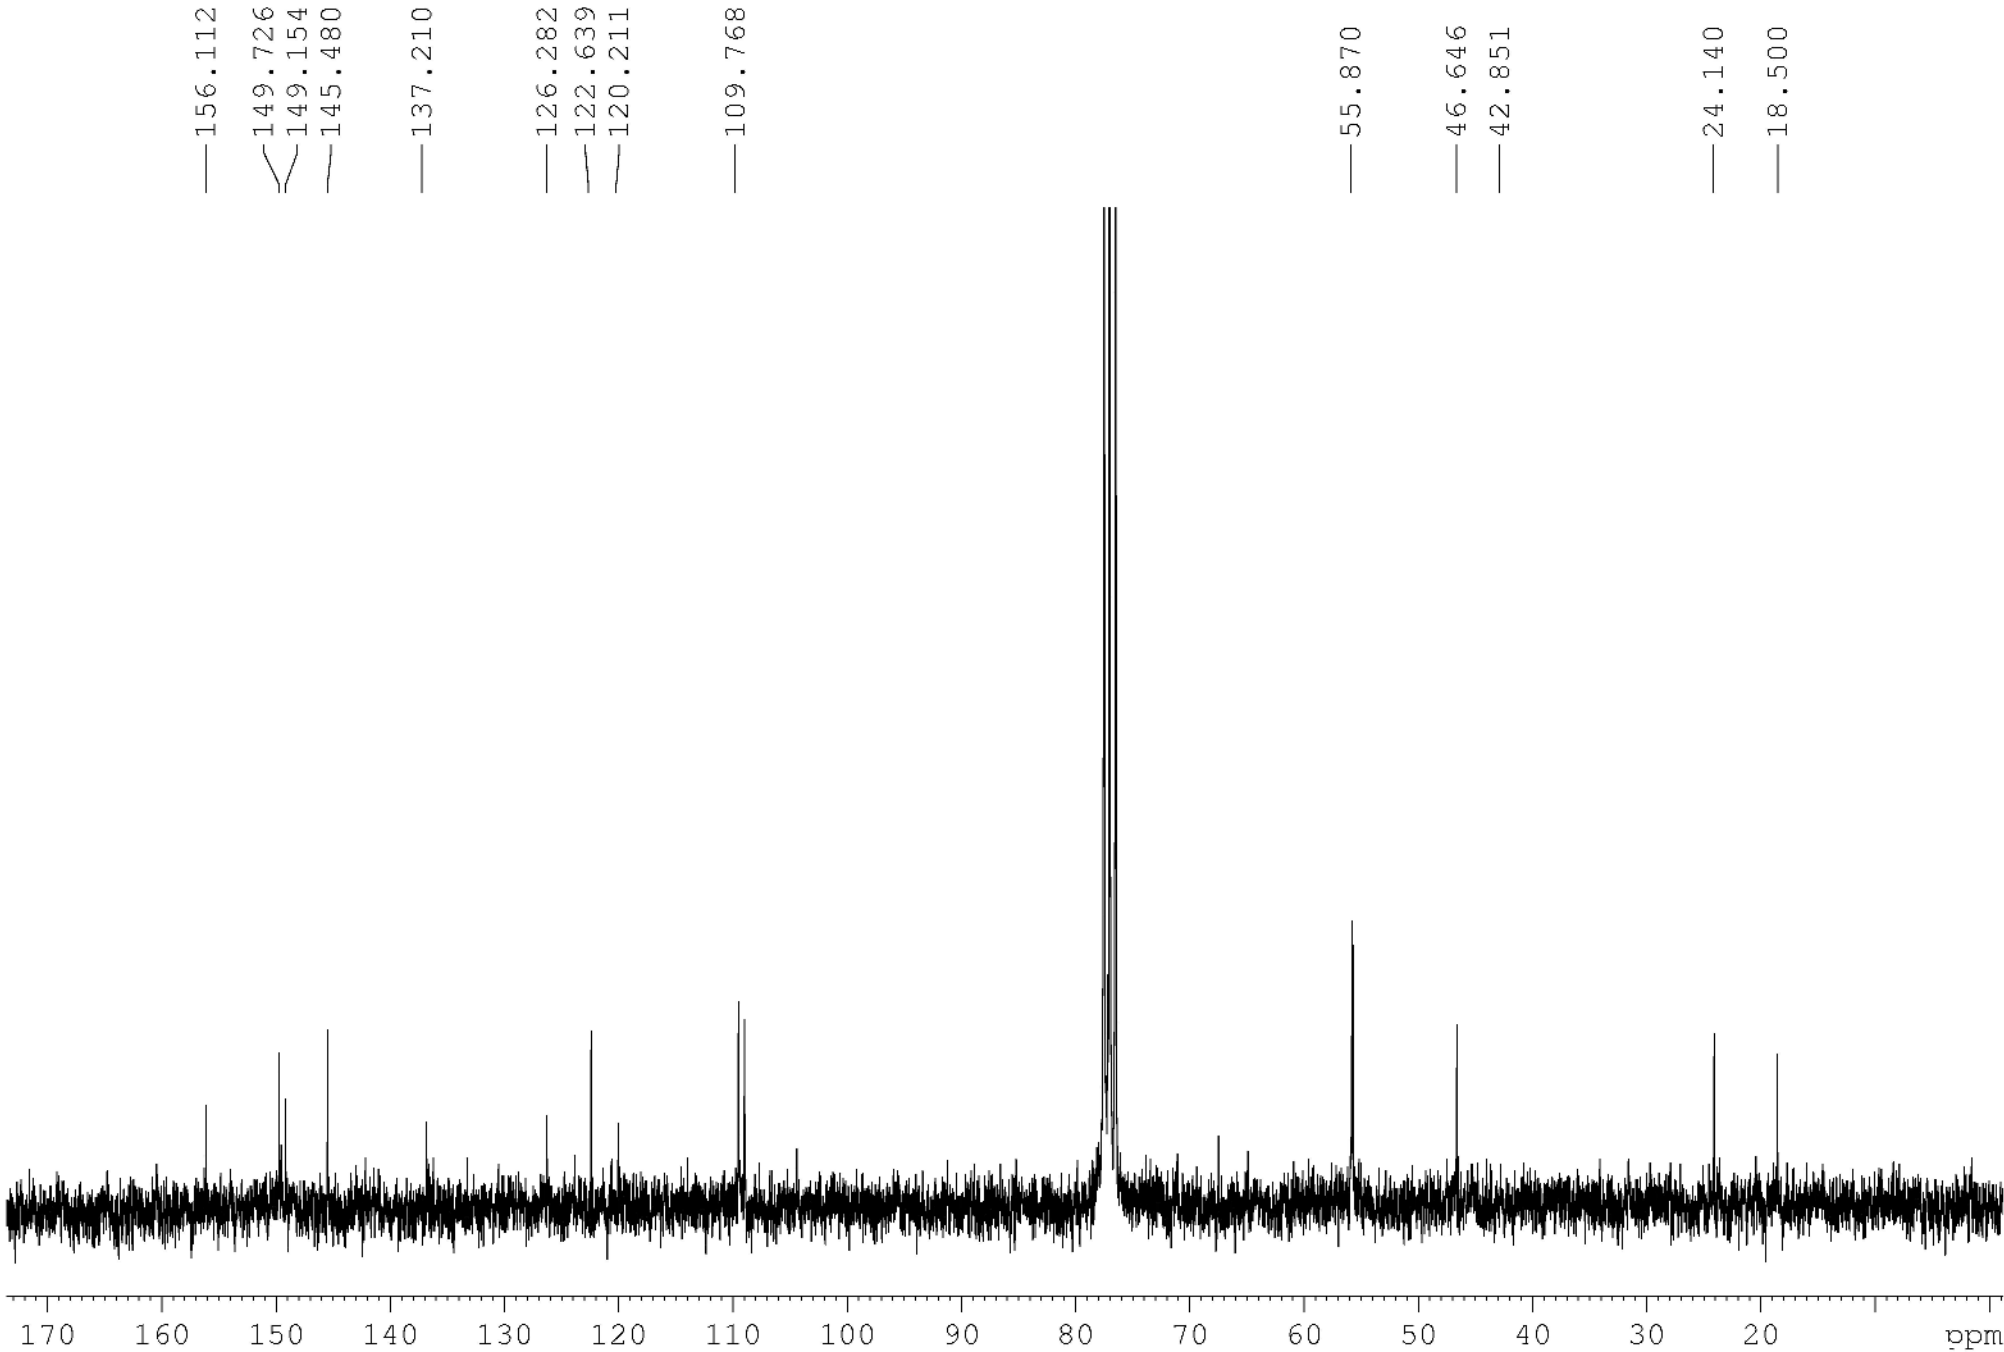

Compound 12

52

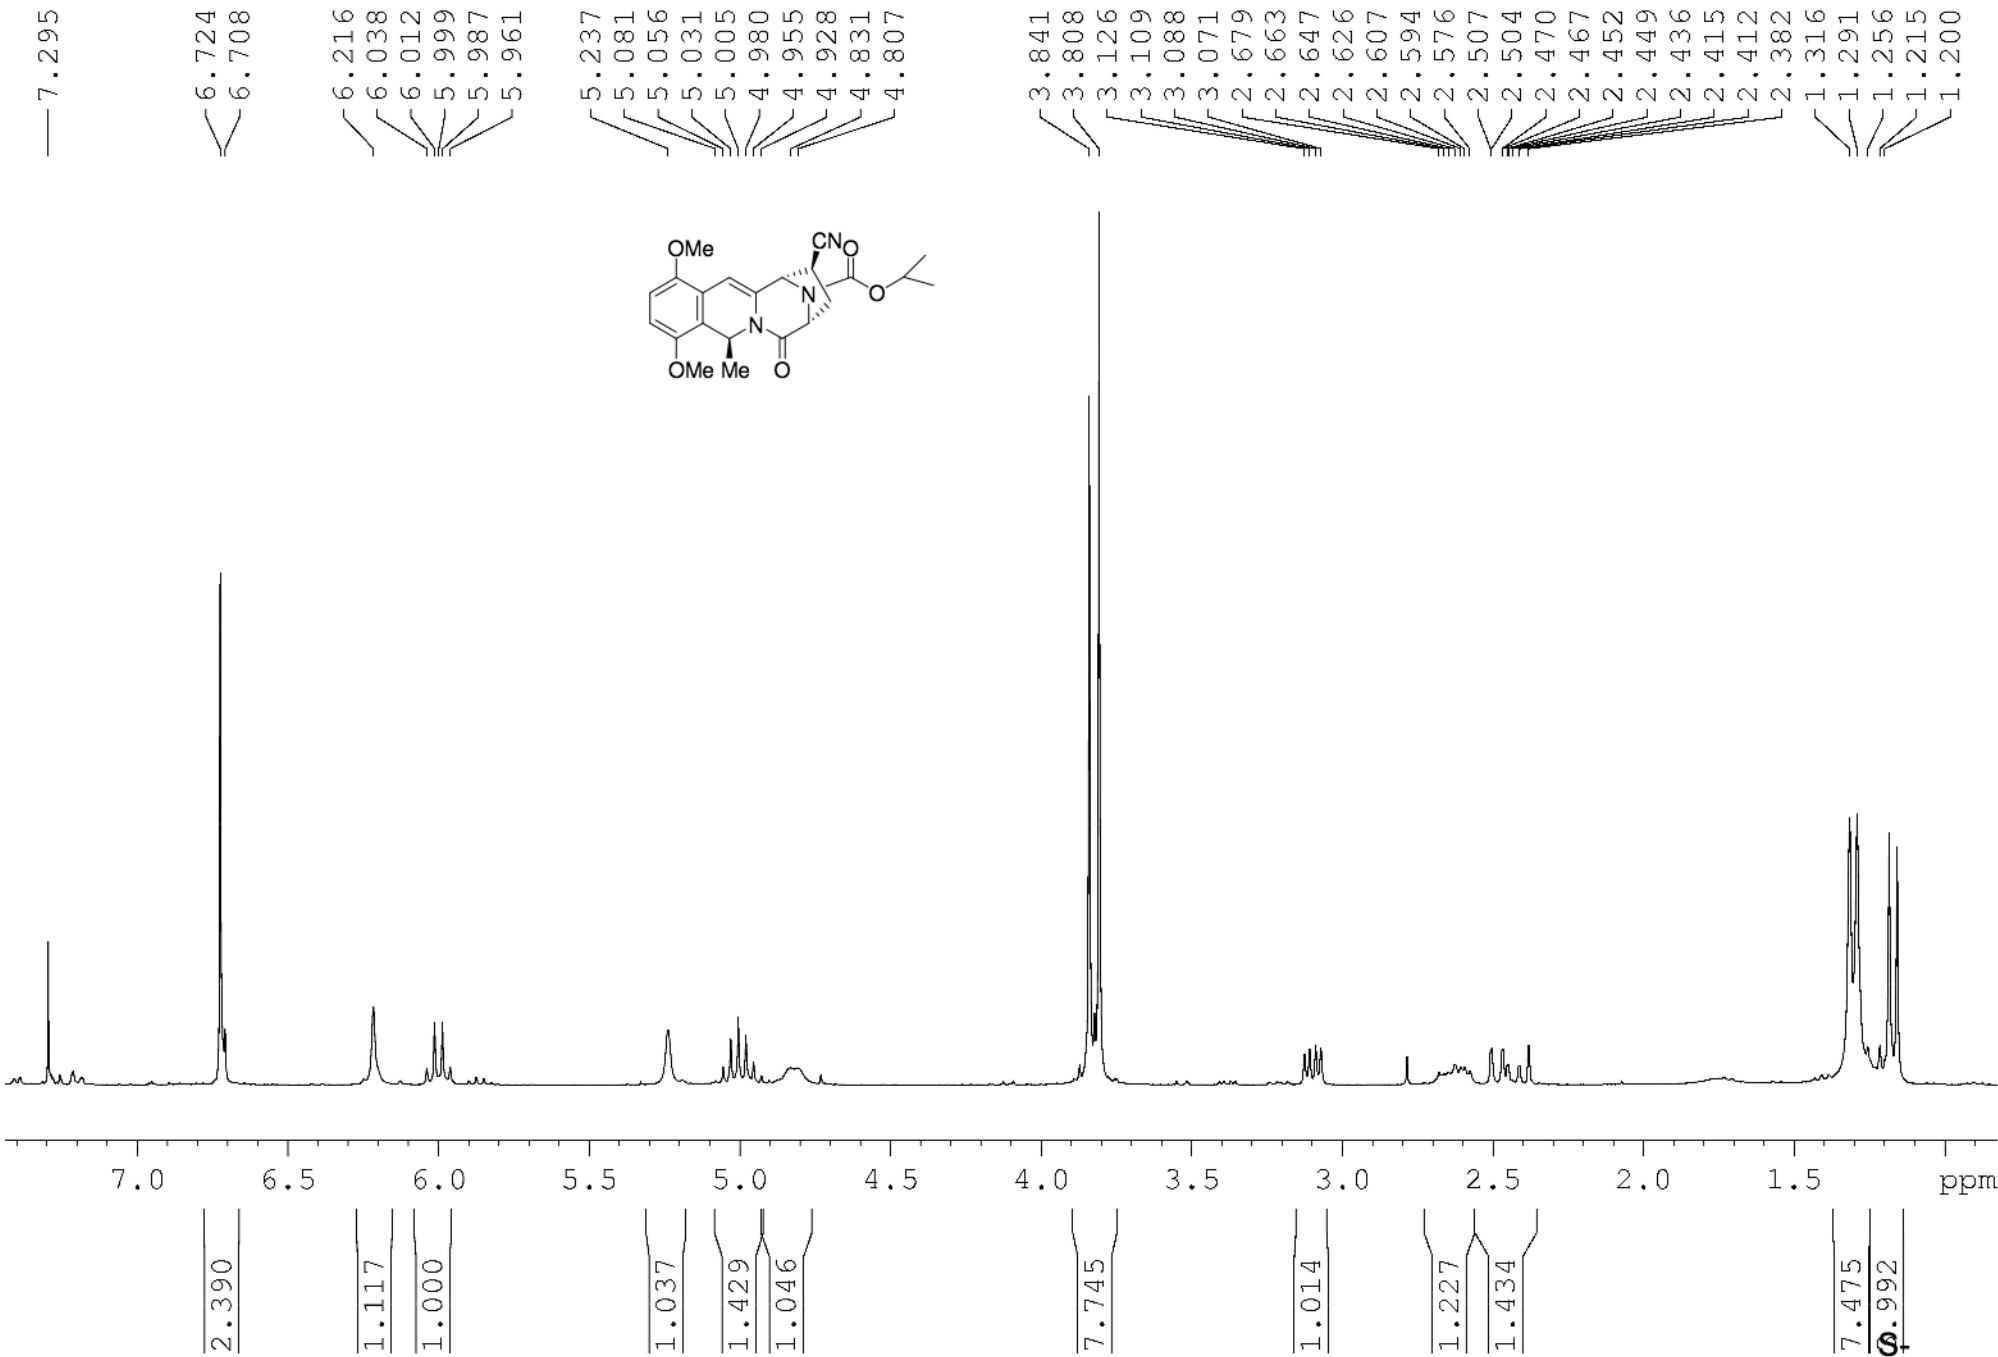

Compound 12

53

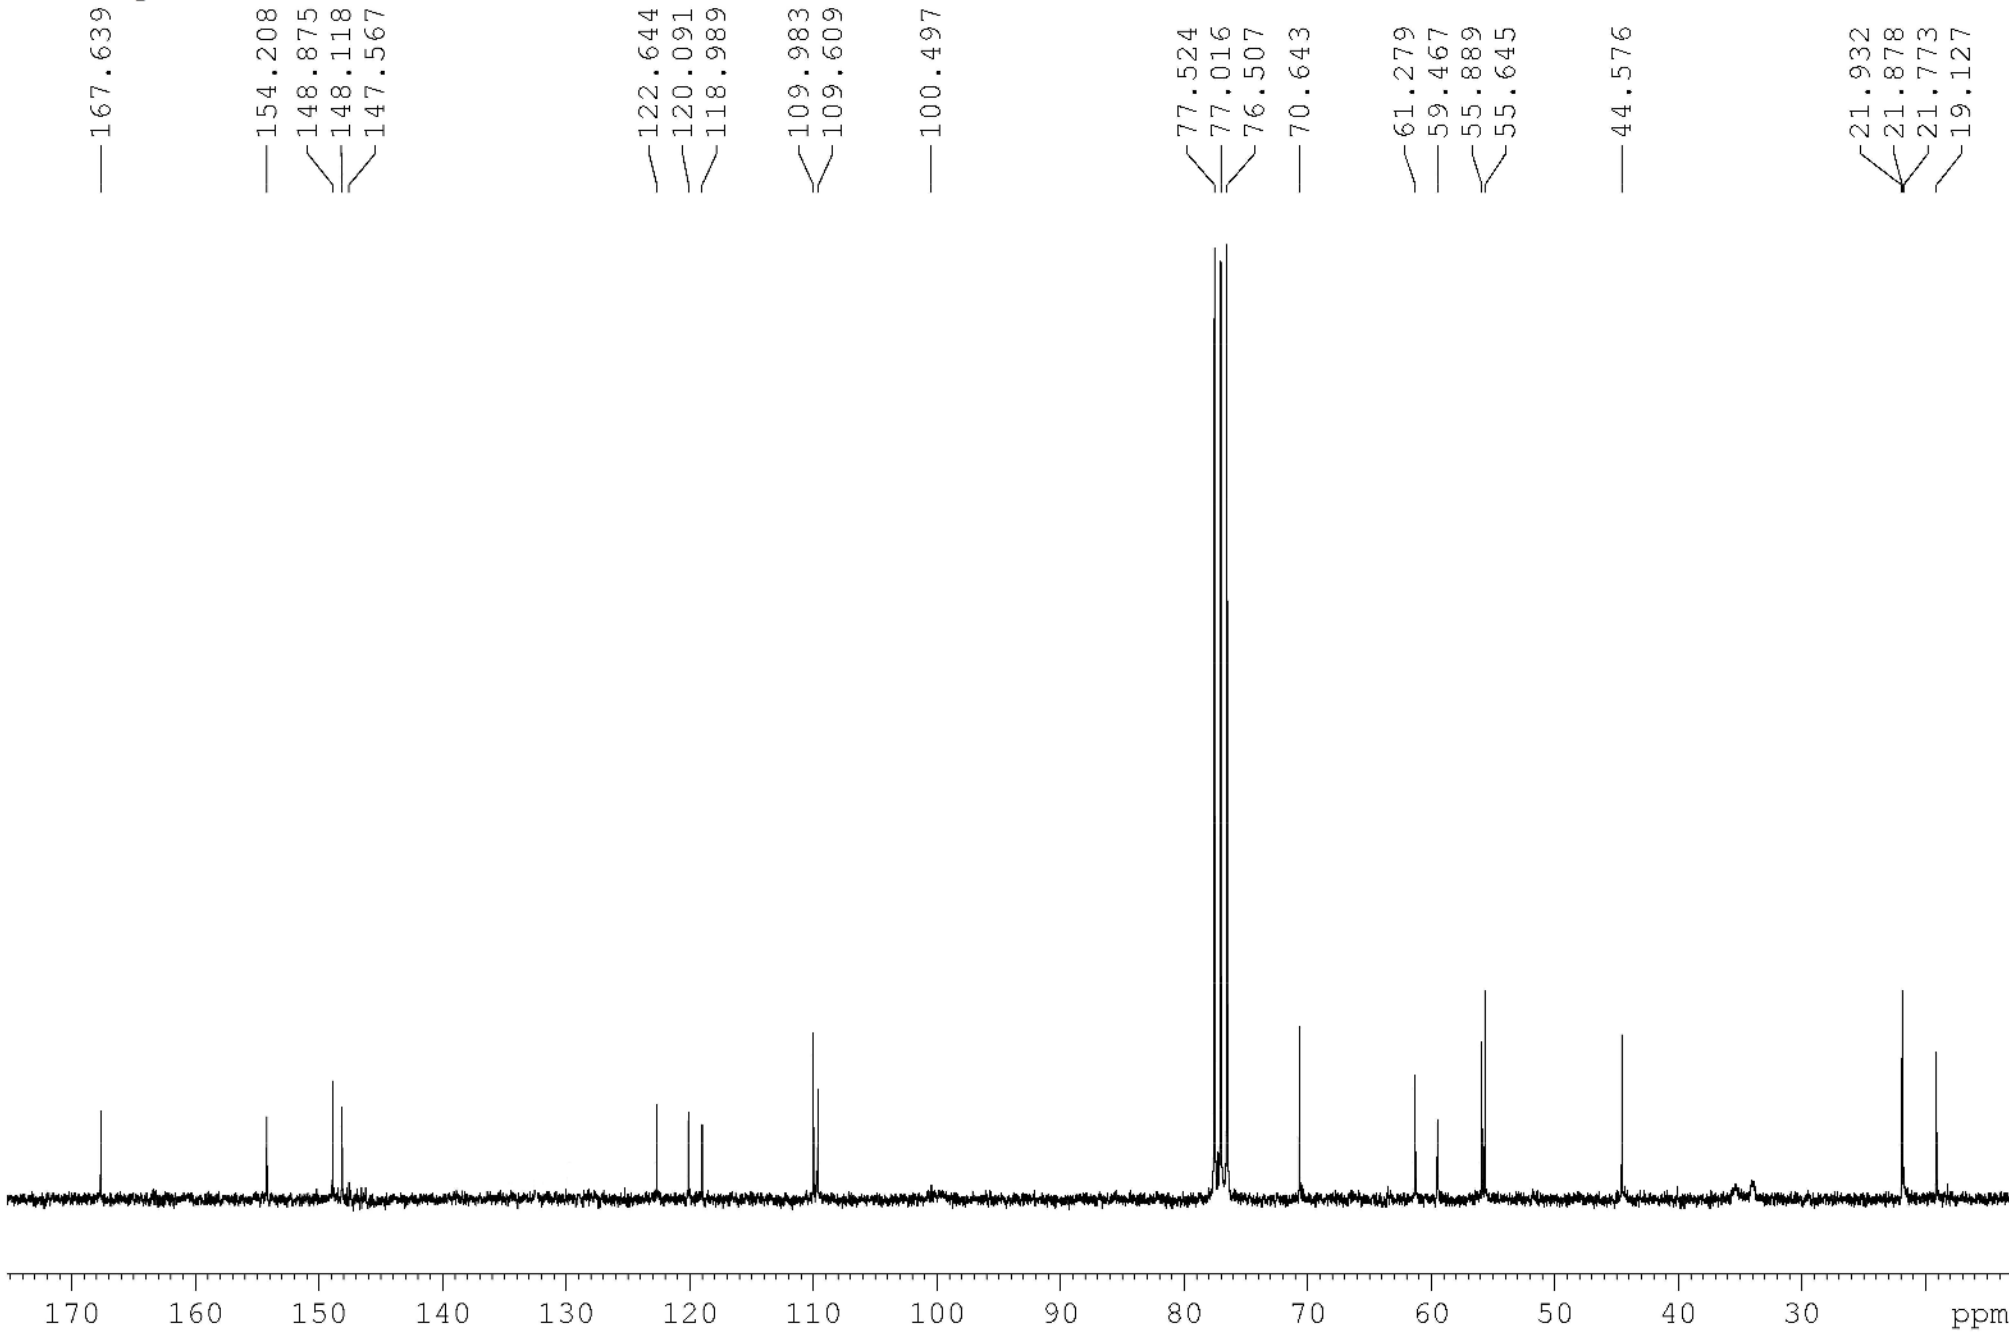

Compound 12

HRMS

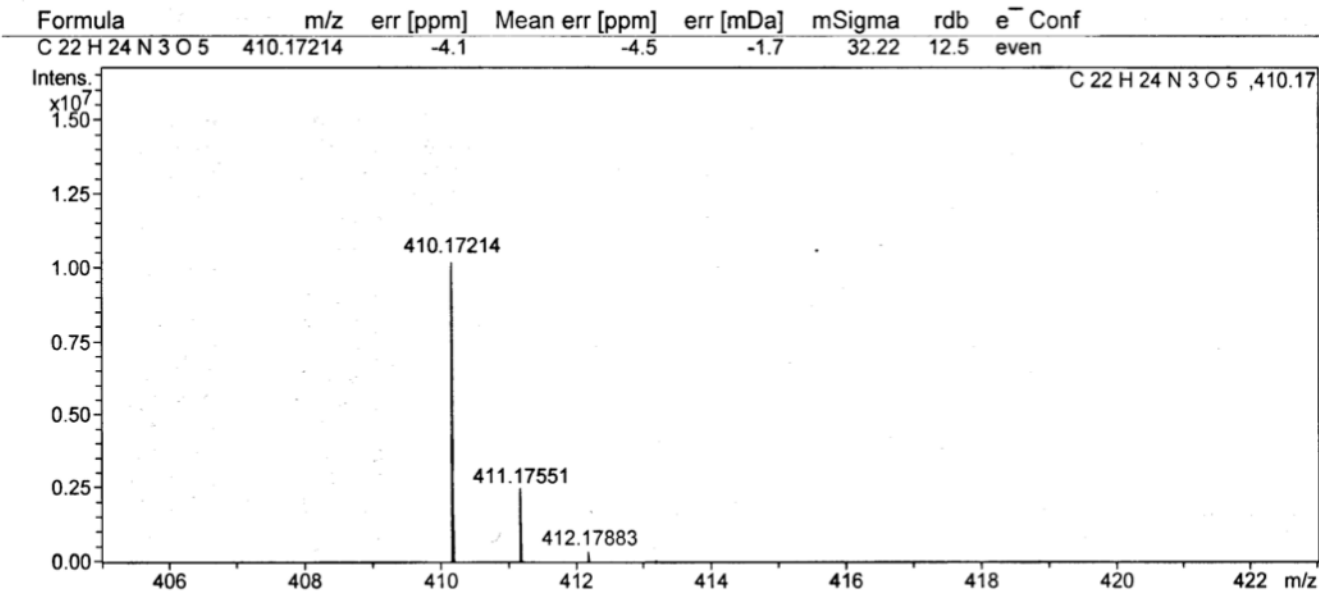

**Compound 13**

55

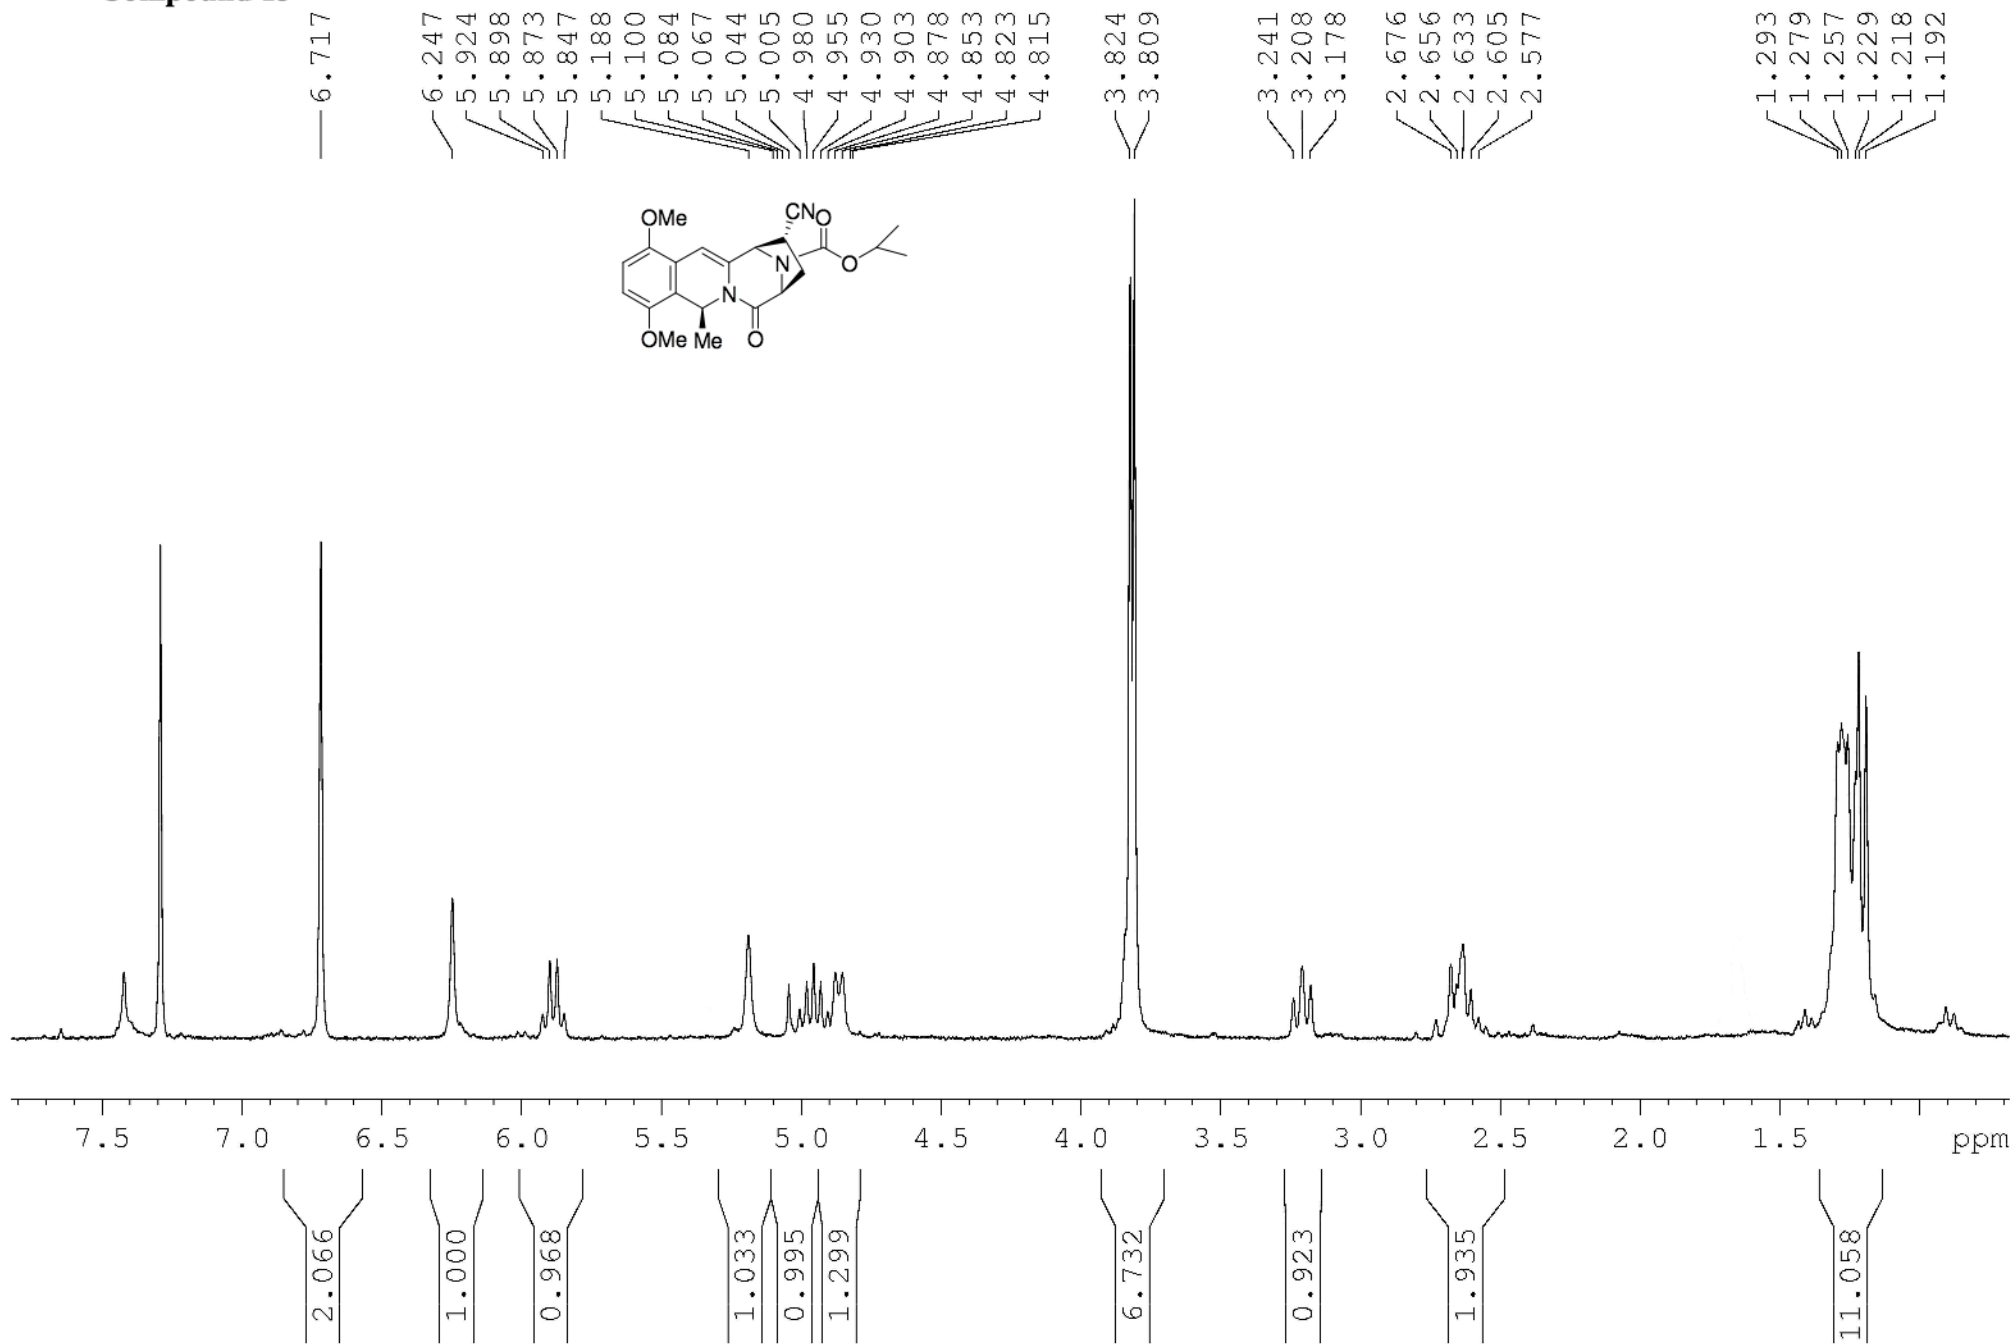

Compound 13

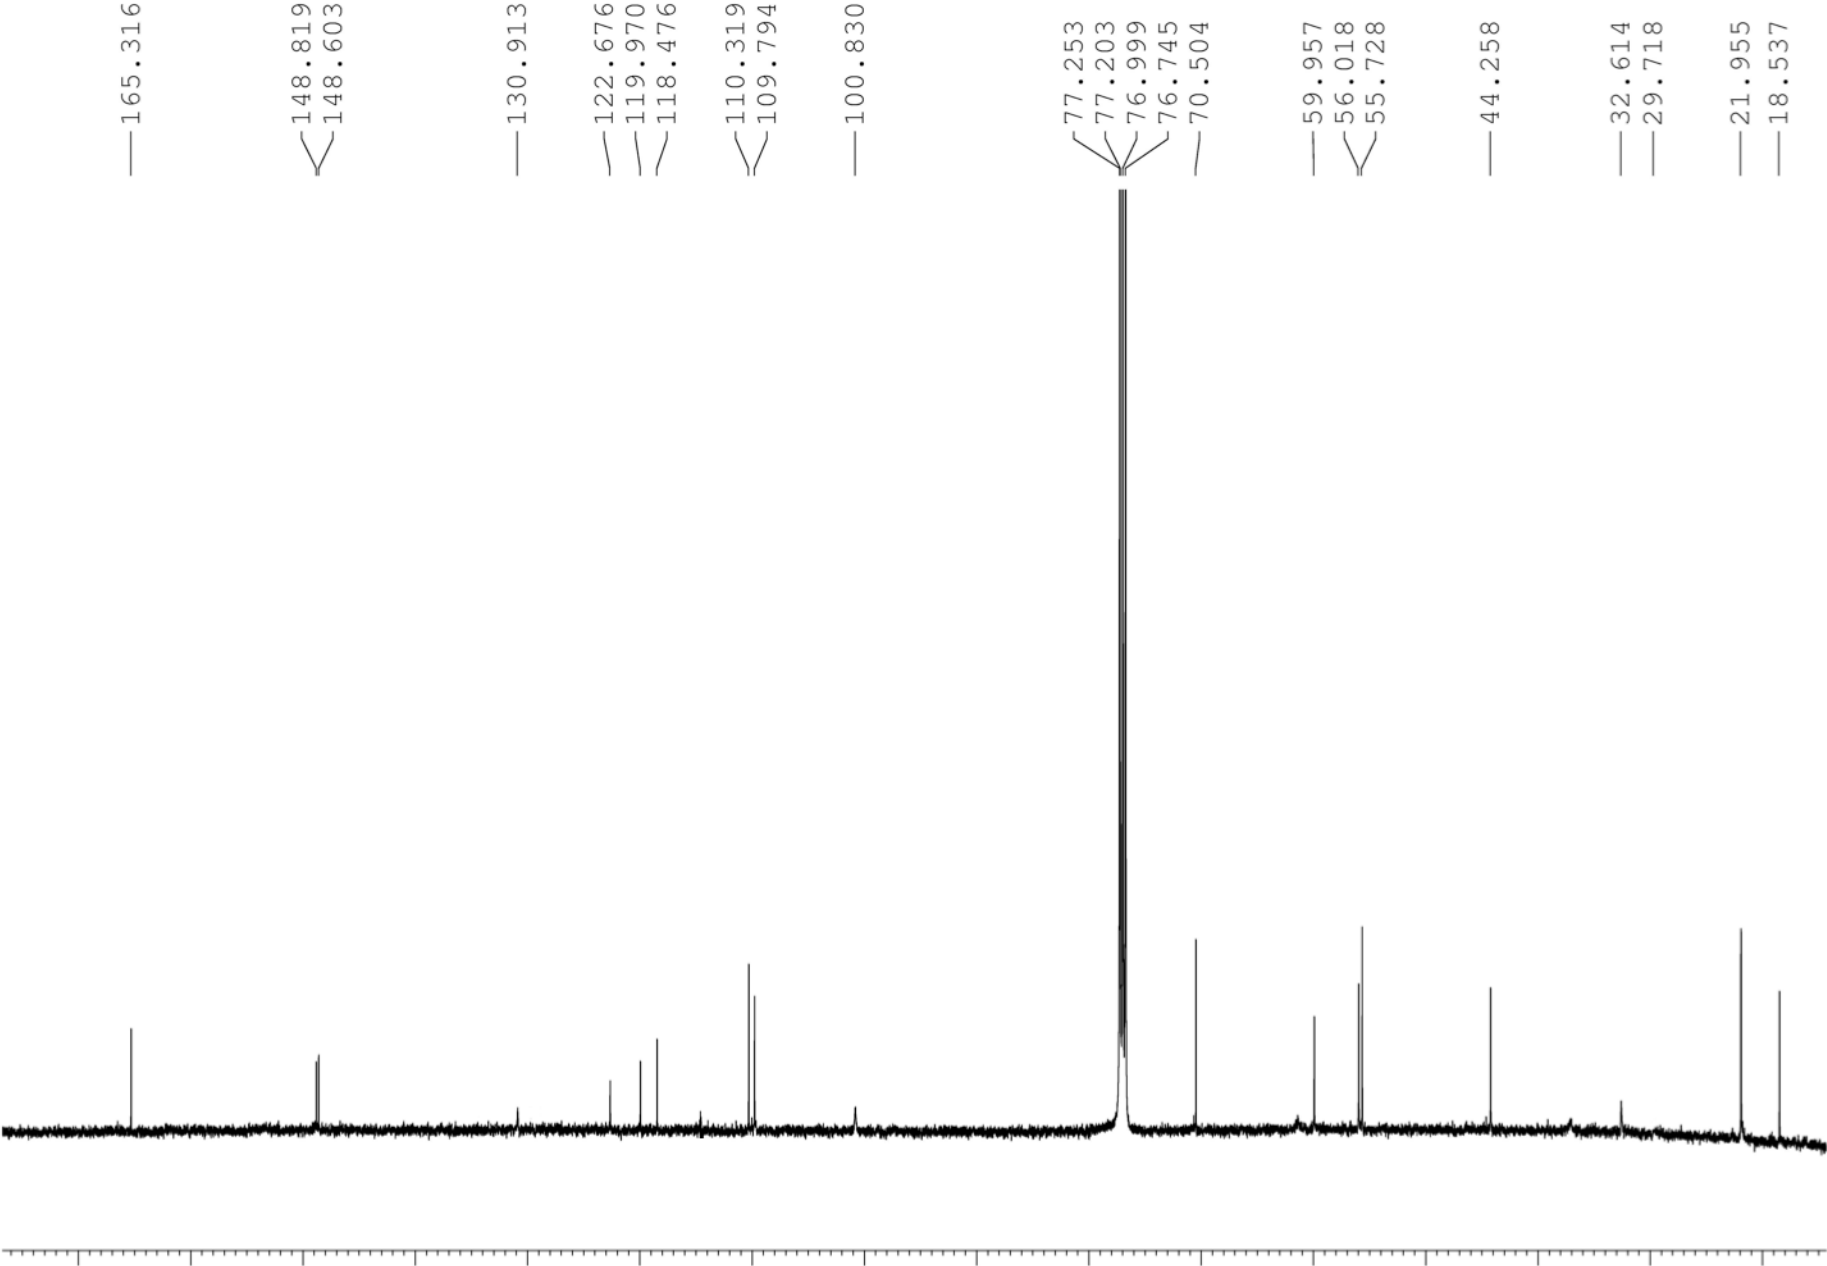

Compound 12

HRMS



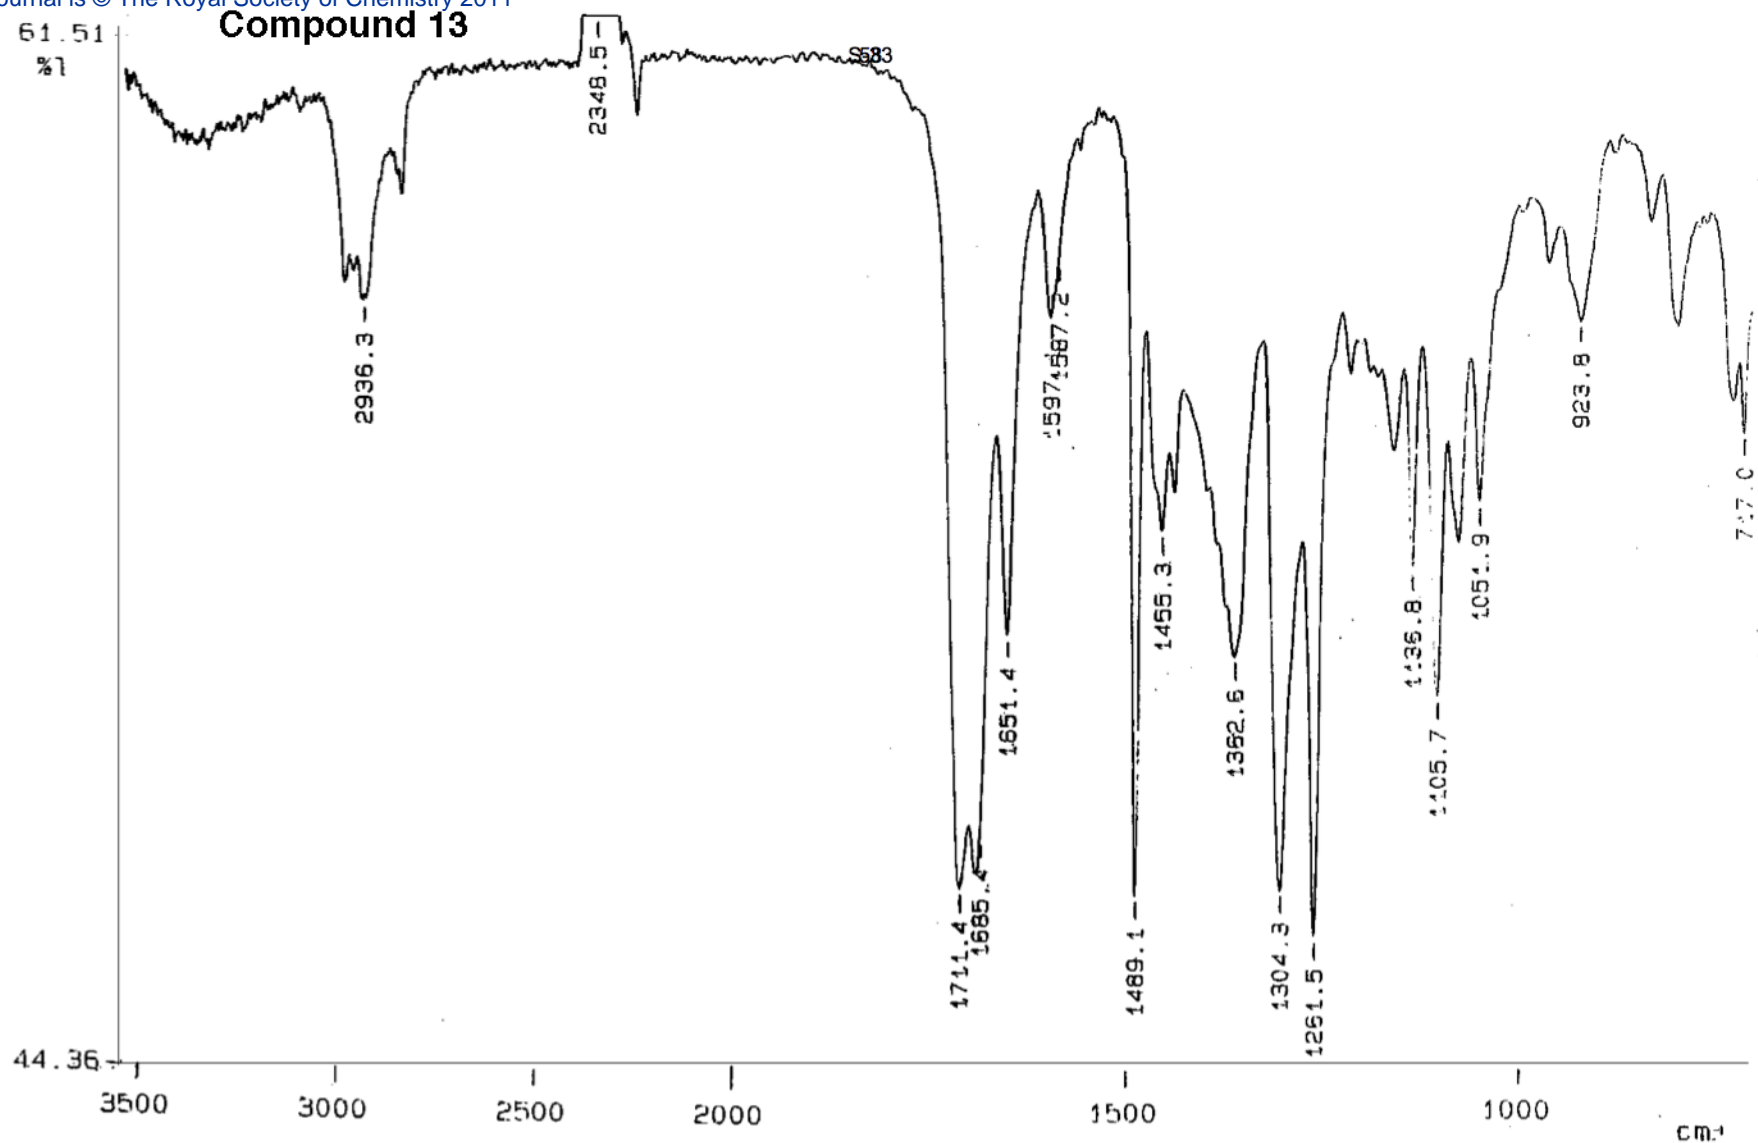



Compound 13

HRMS

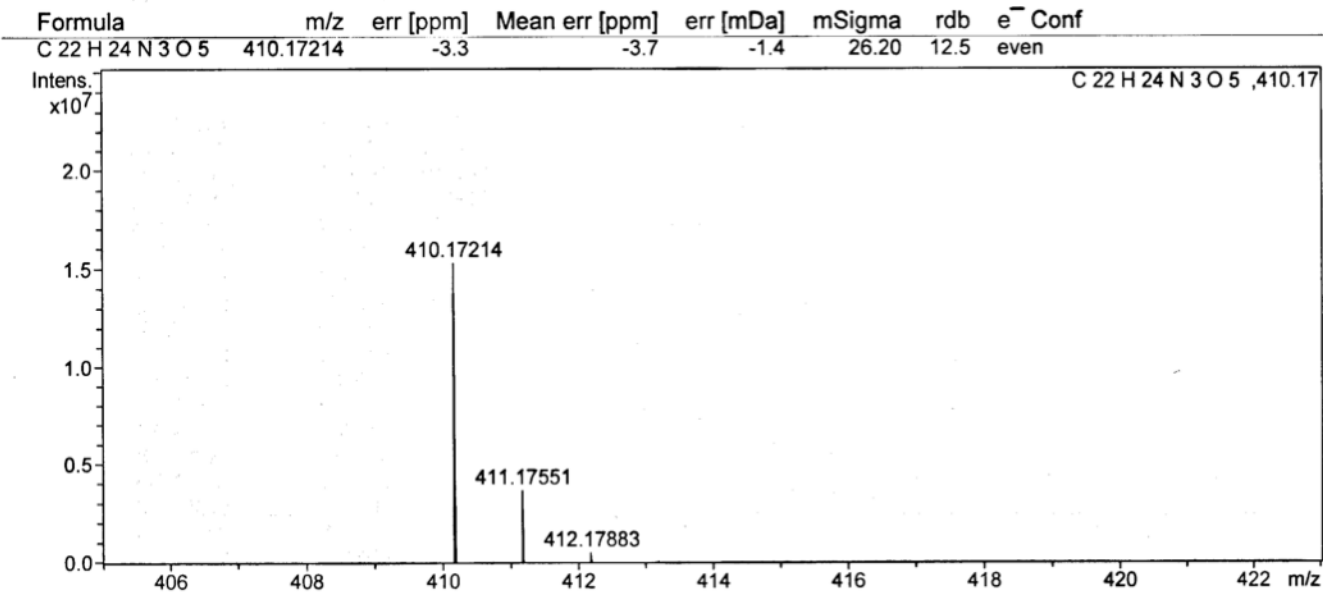

Compound 14

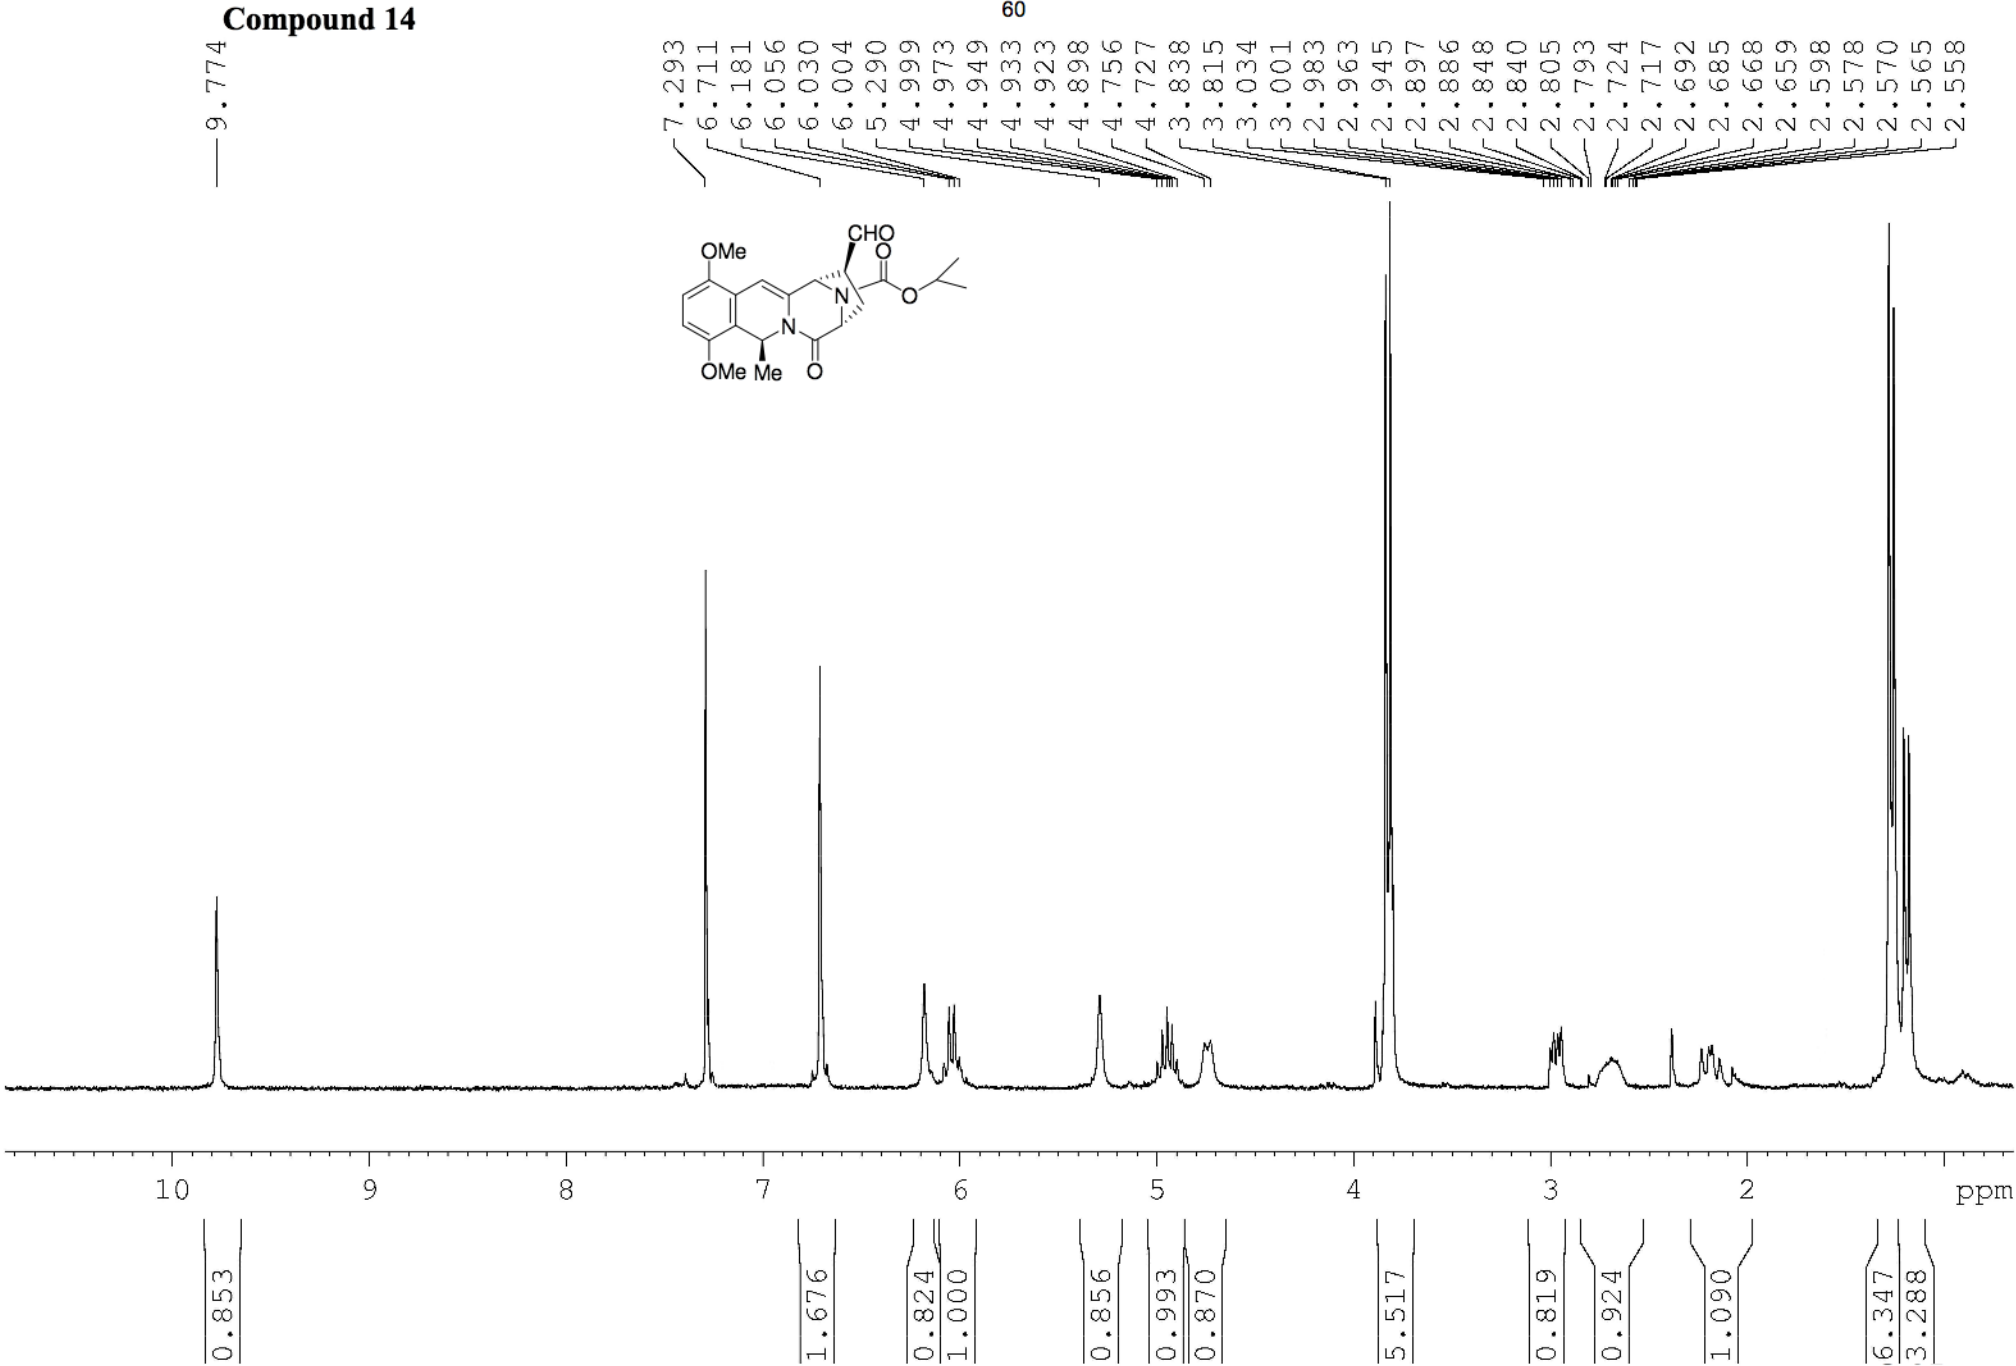

Compound 14

61

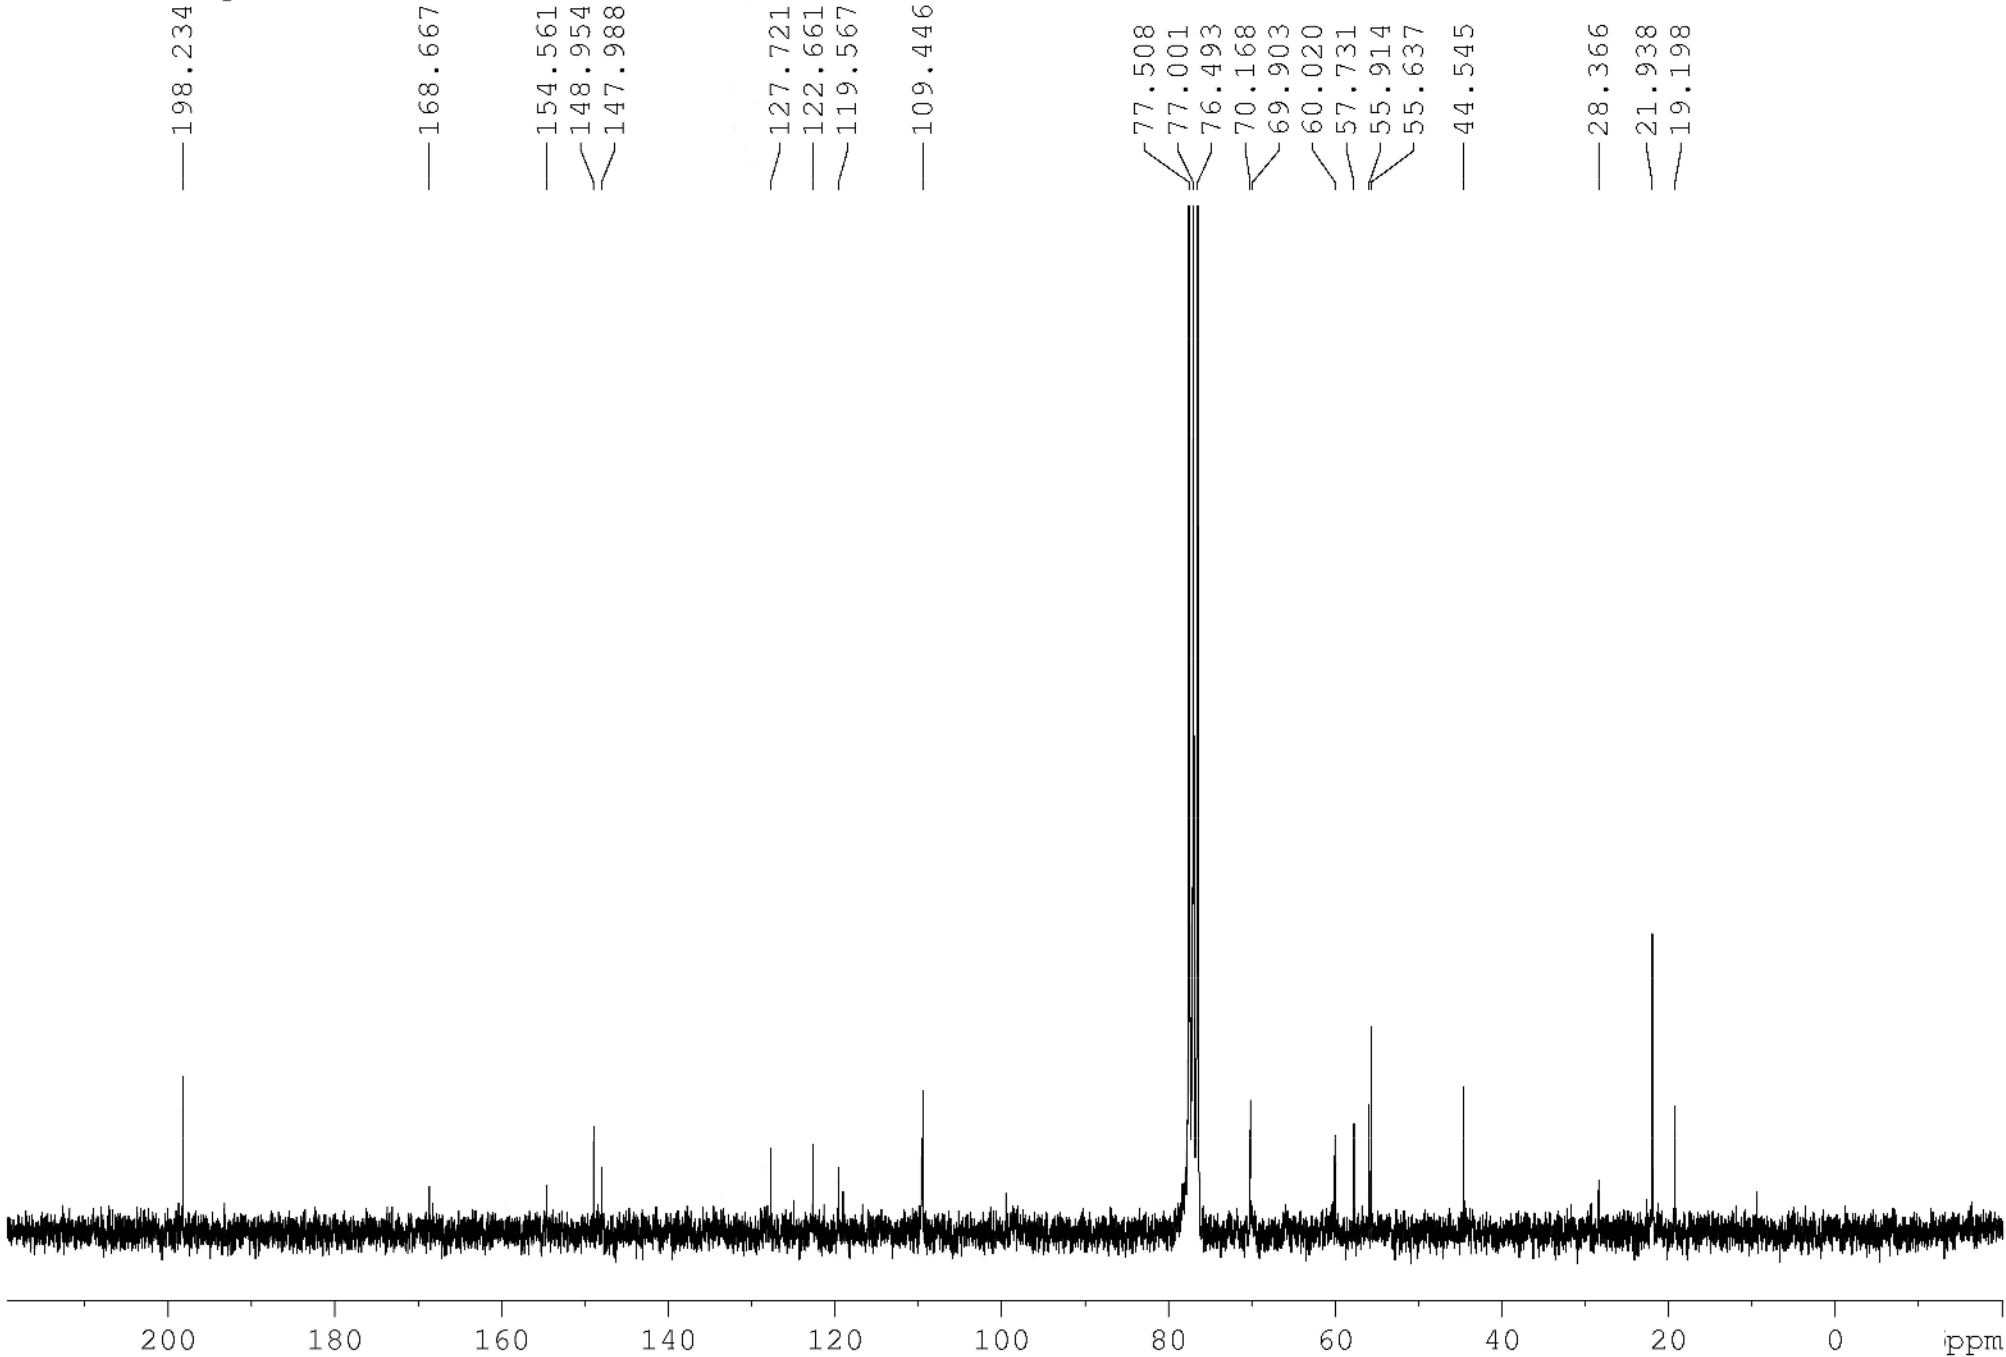

Compound 14

HRMS

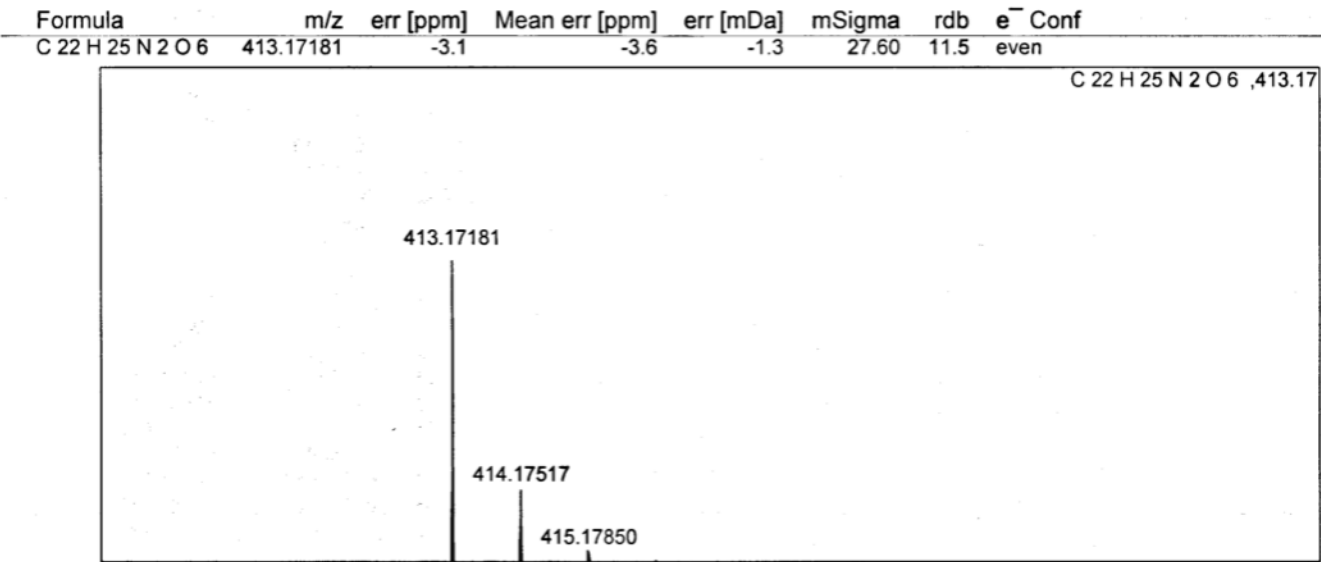

Compound 15

63

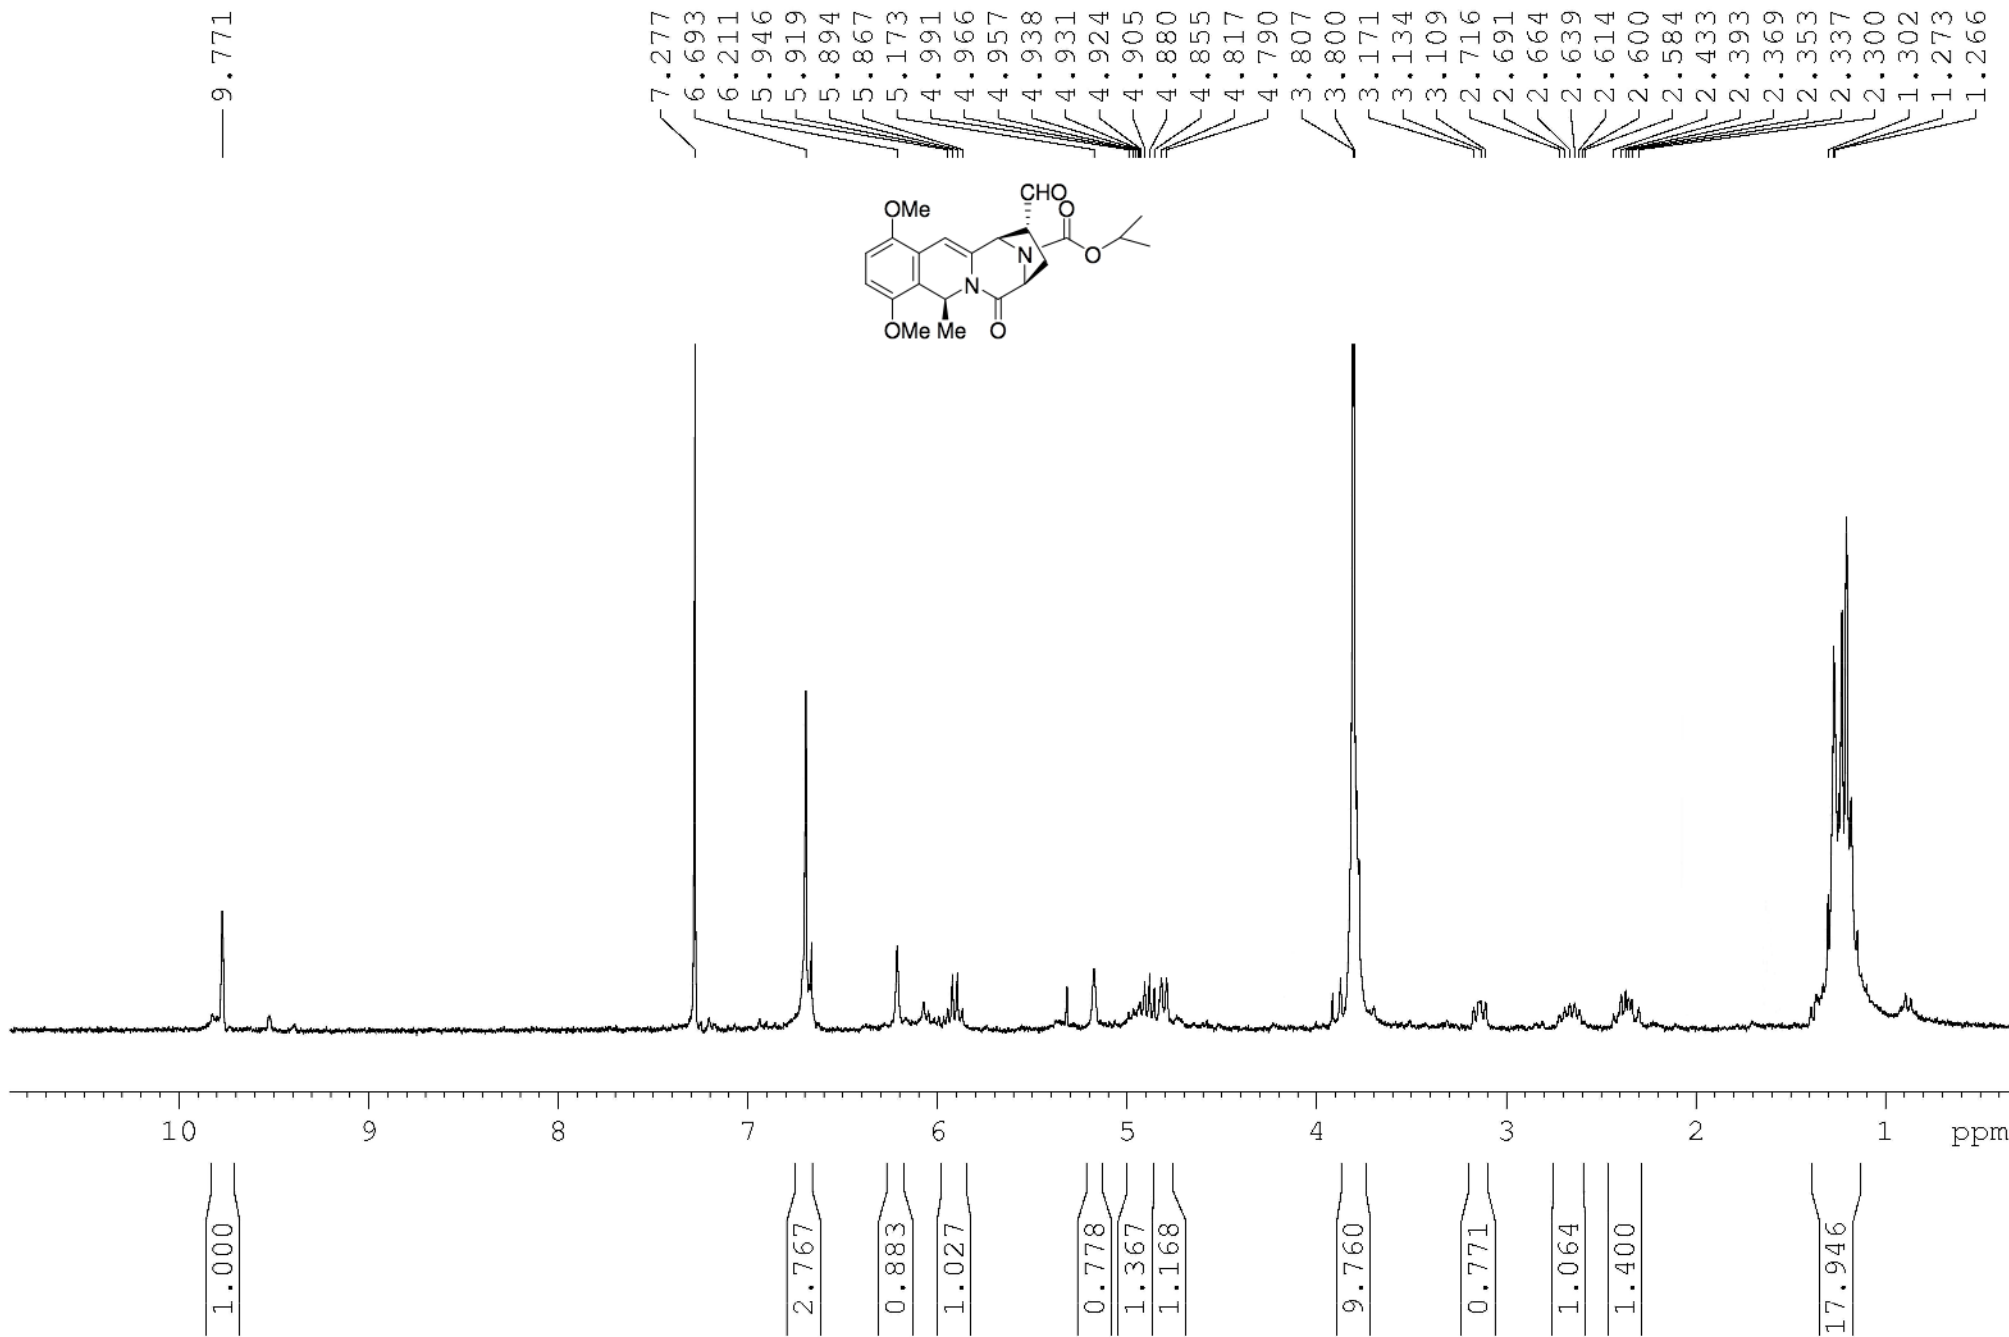

Compound 15

64

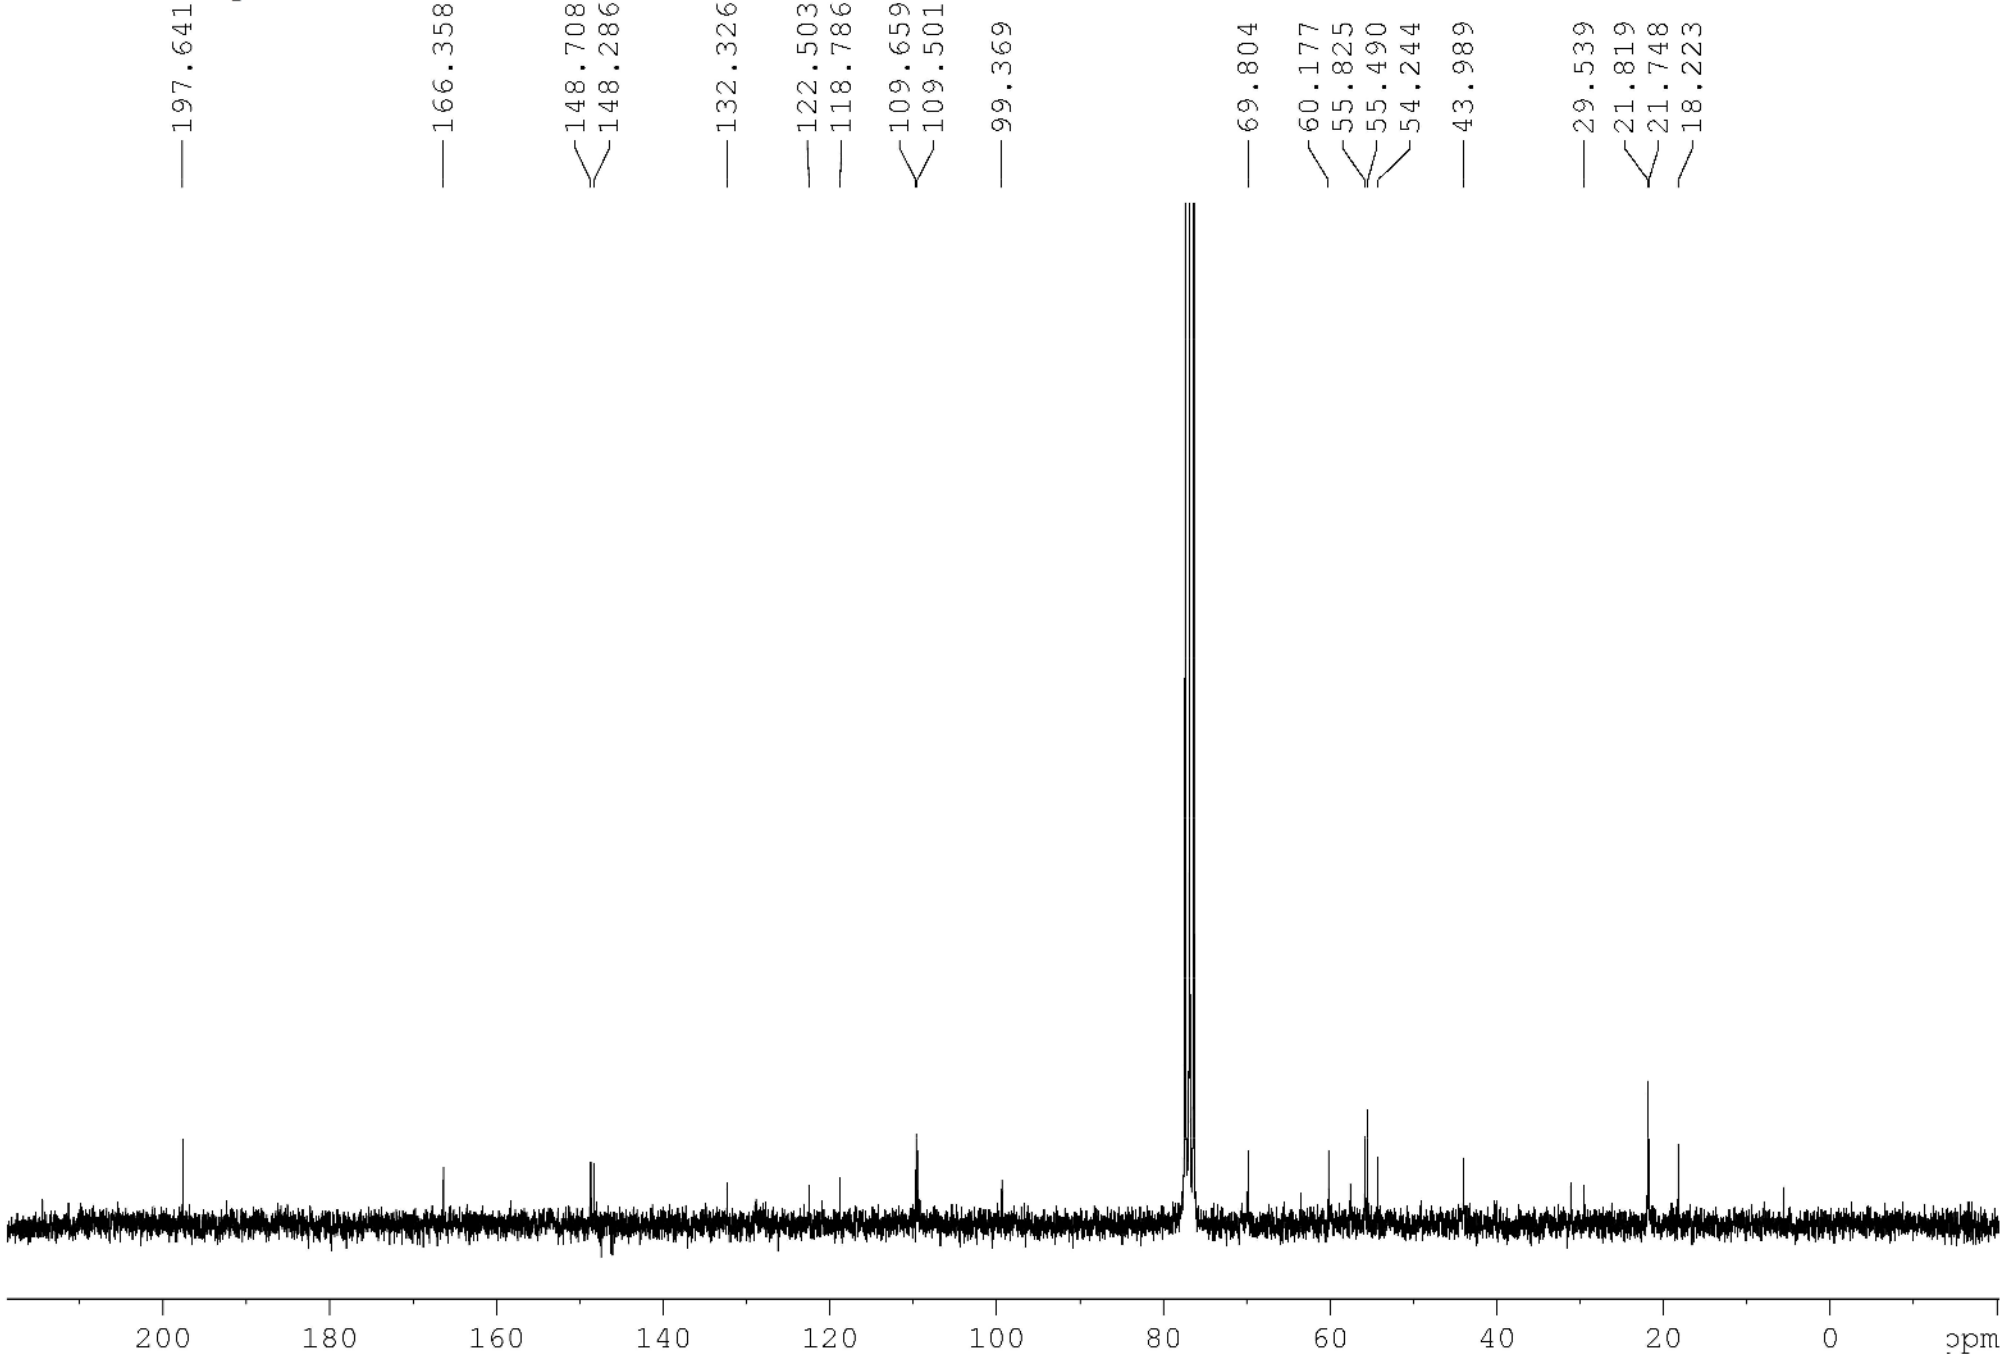

Compound 15

HRMS

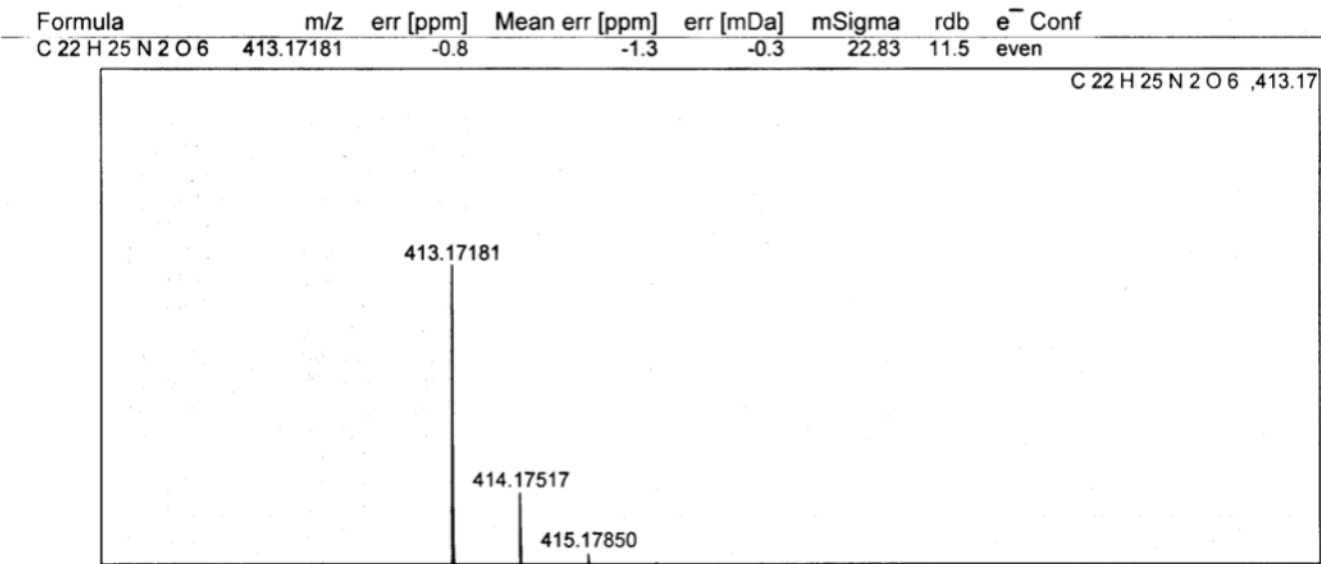

66

**Compound 16**

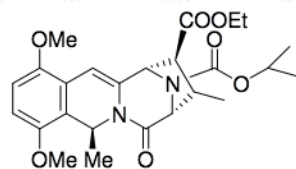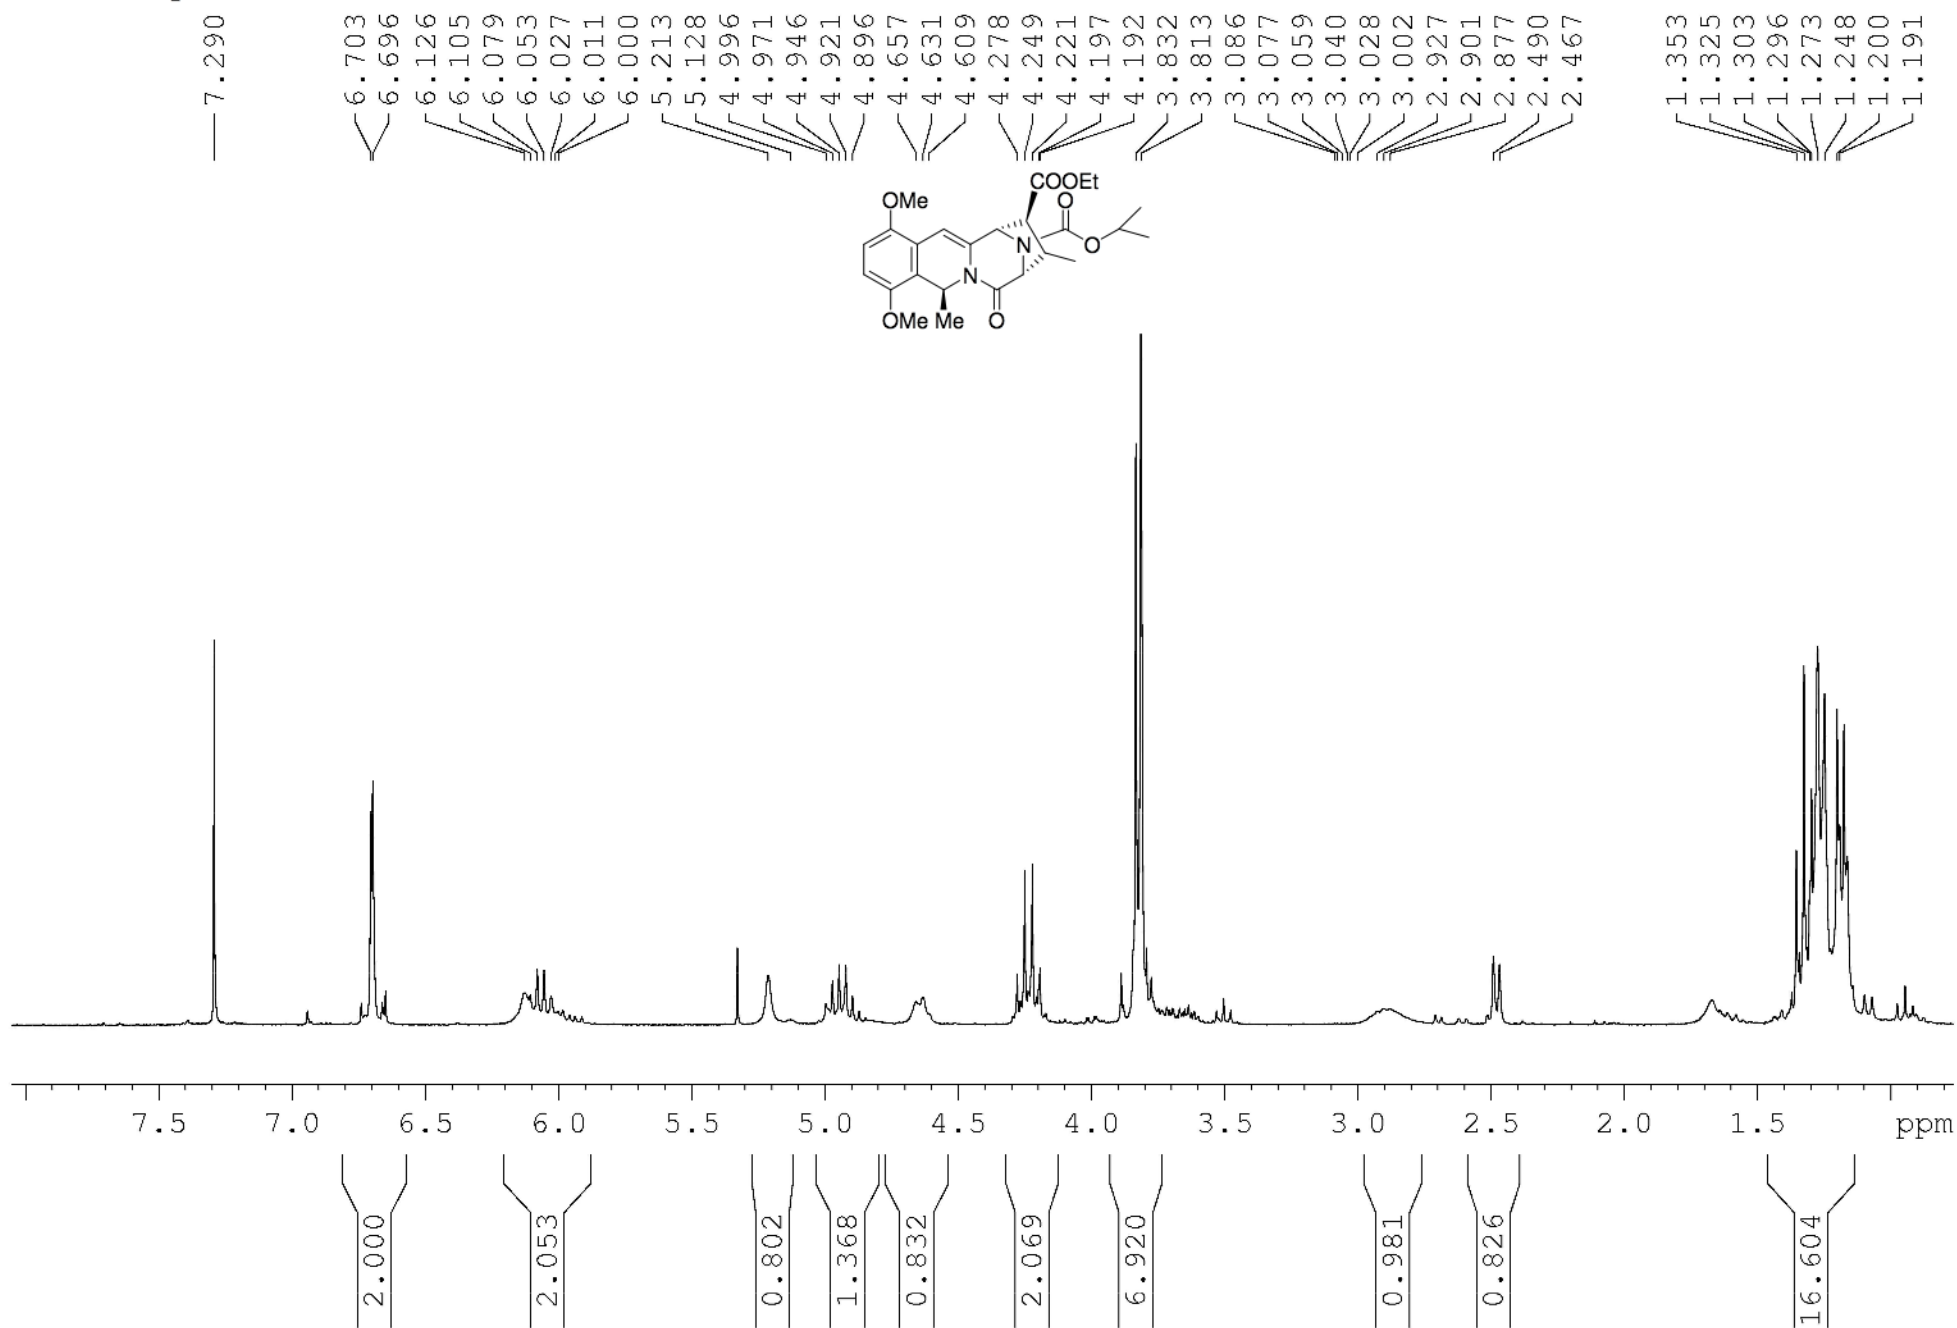



Compound 16

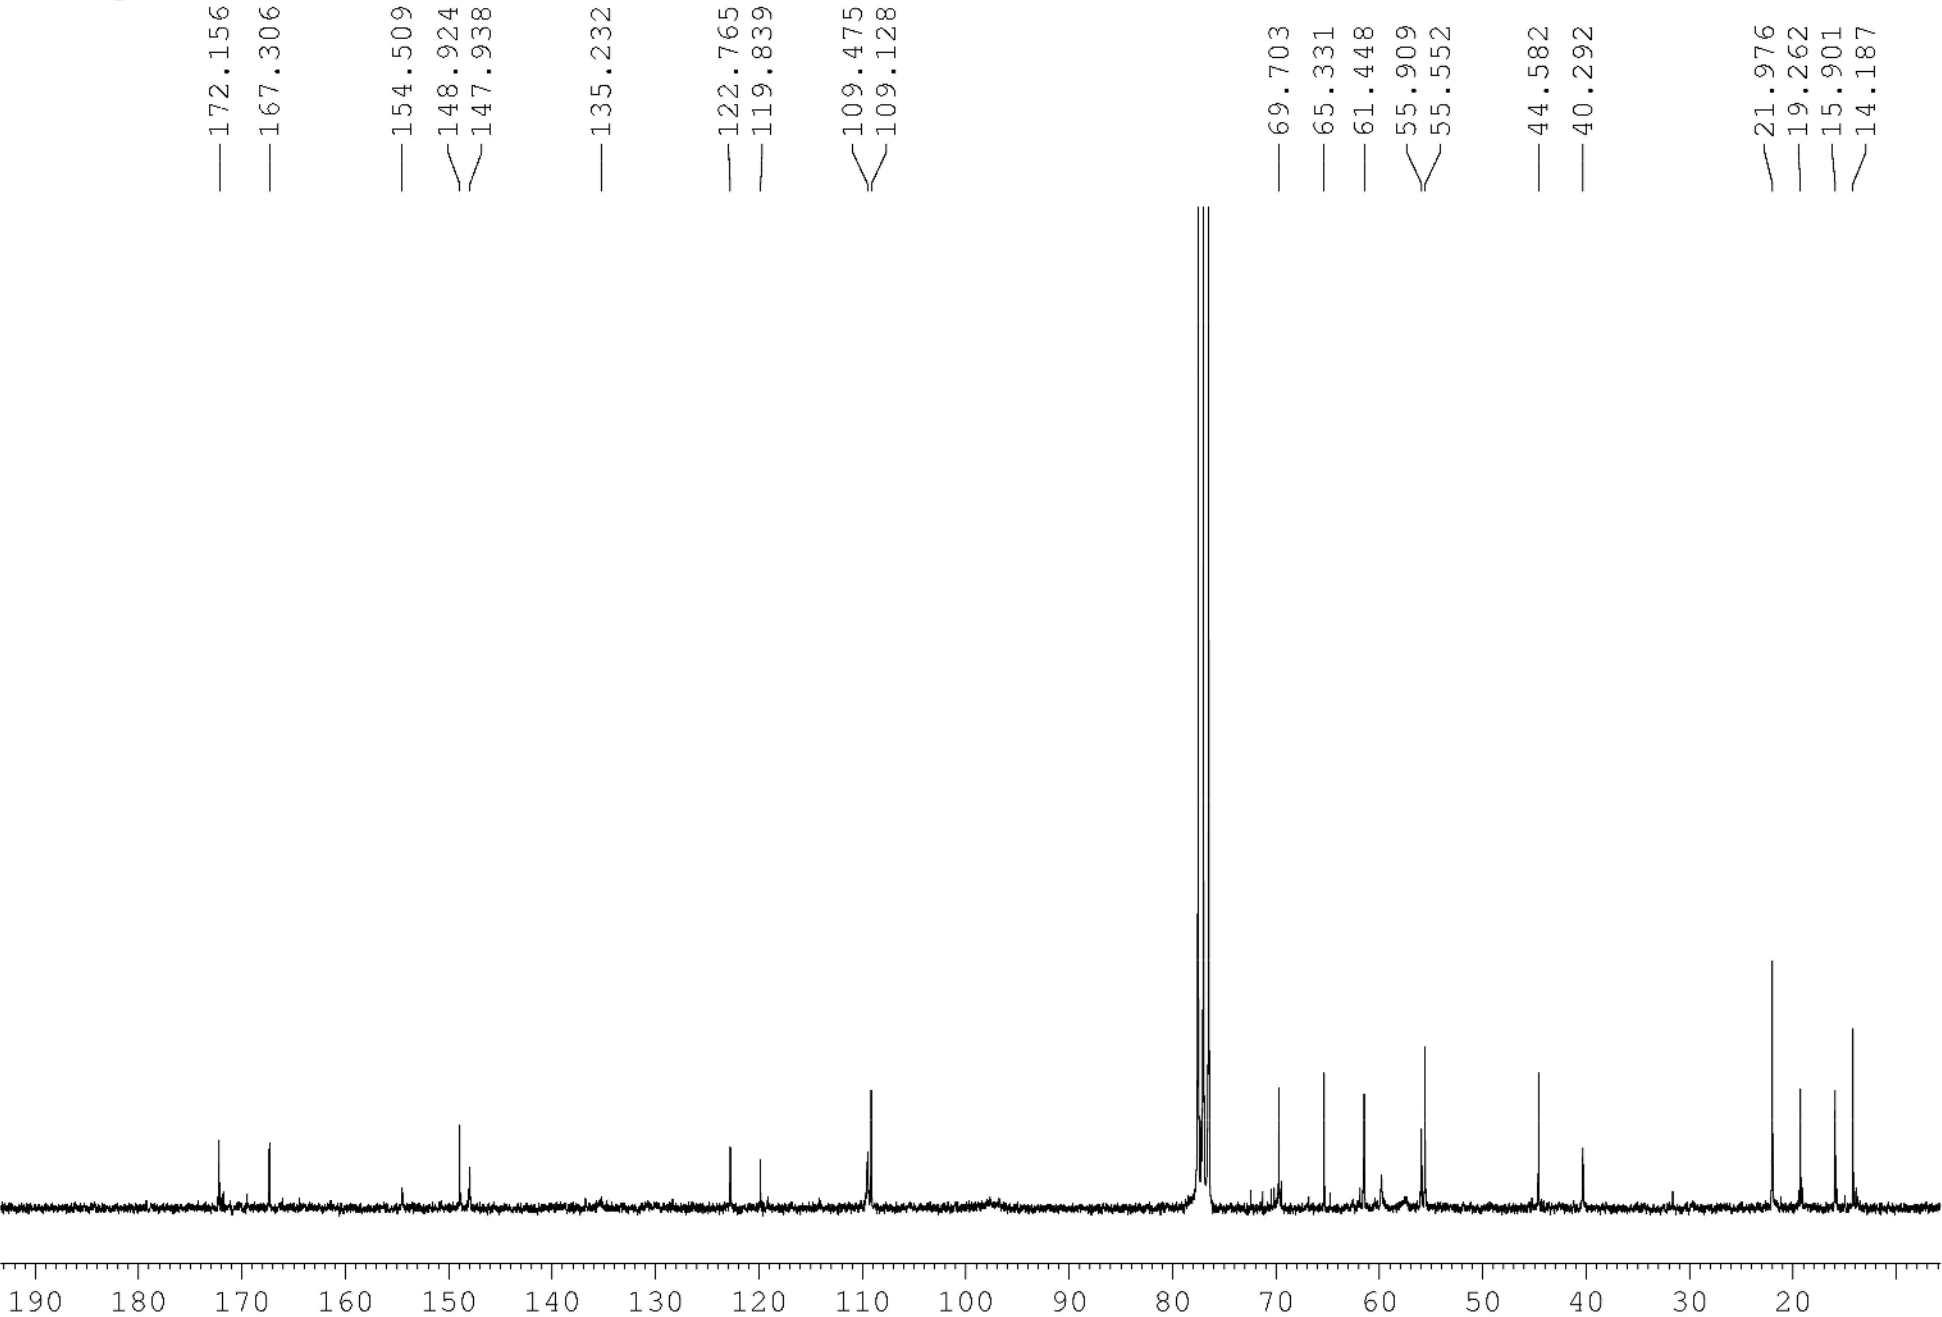

Compound 16

HRMS

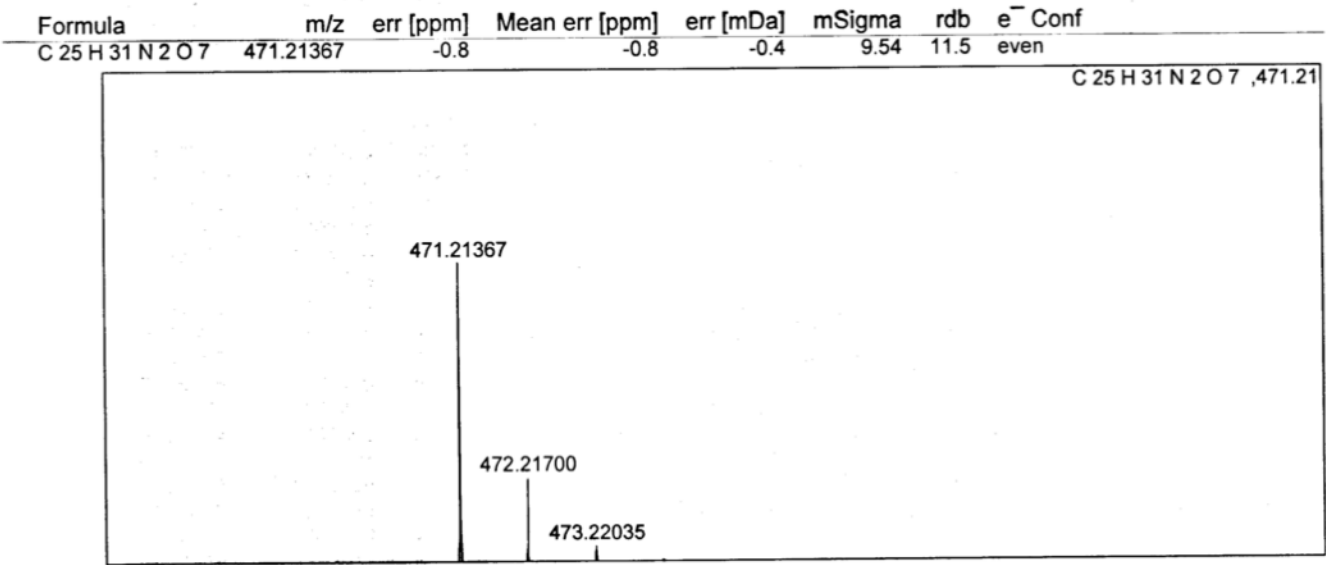

Compound 17

69

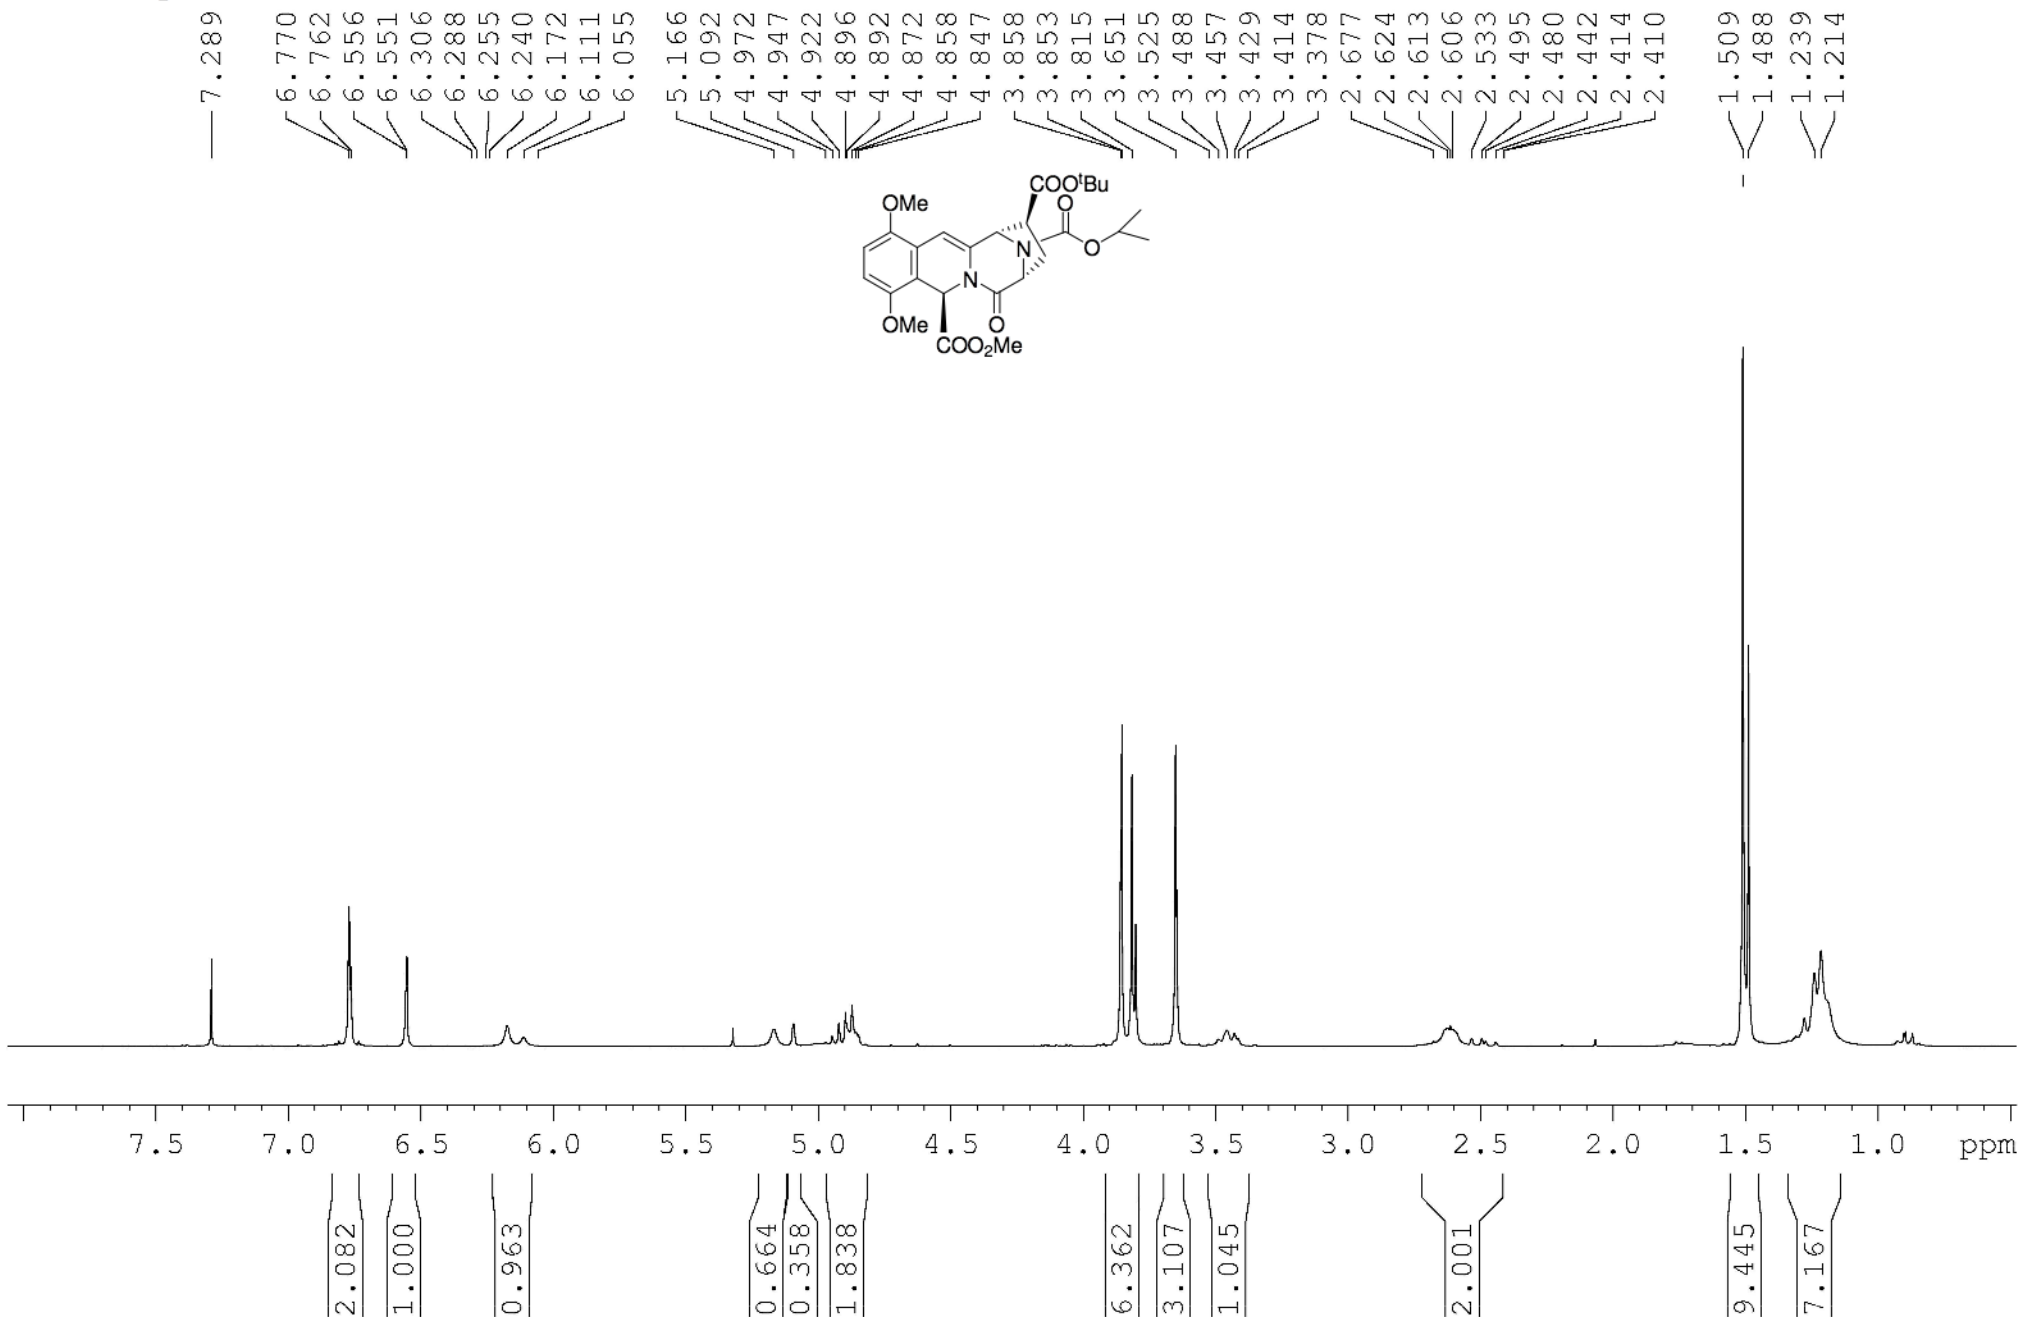

Compound 17

70

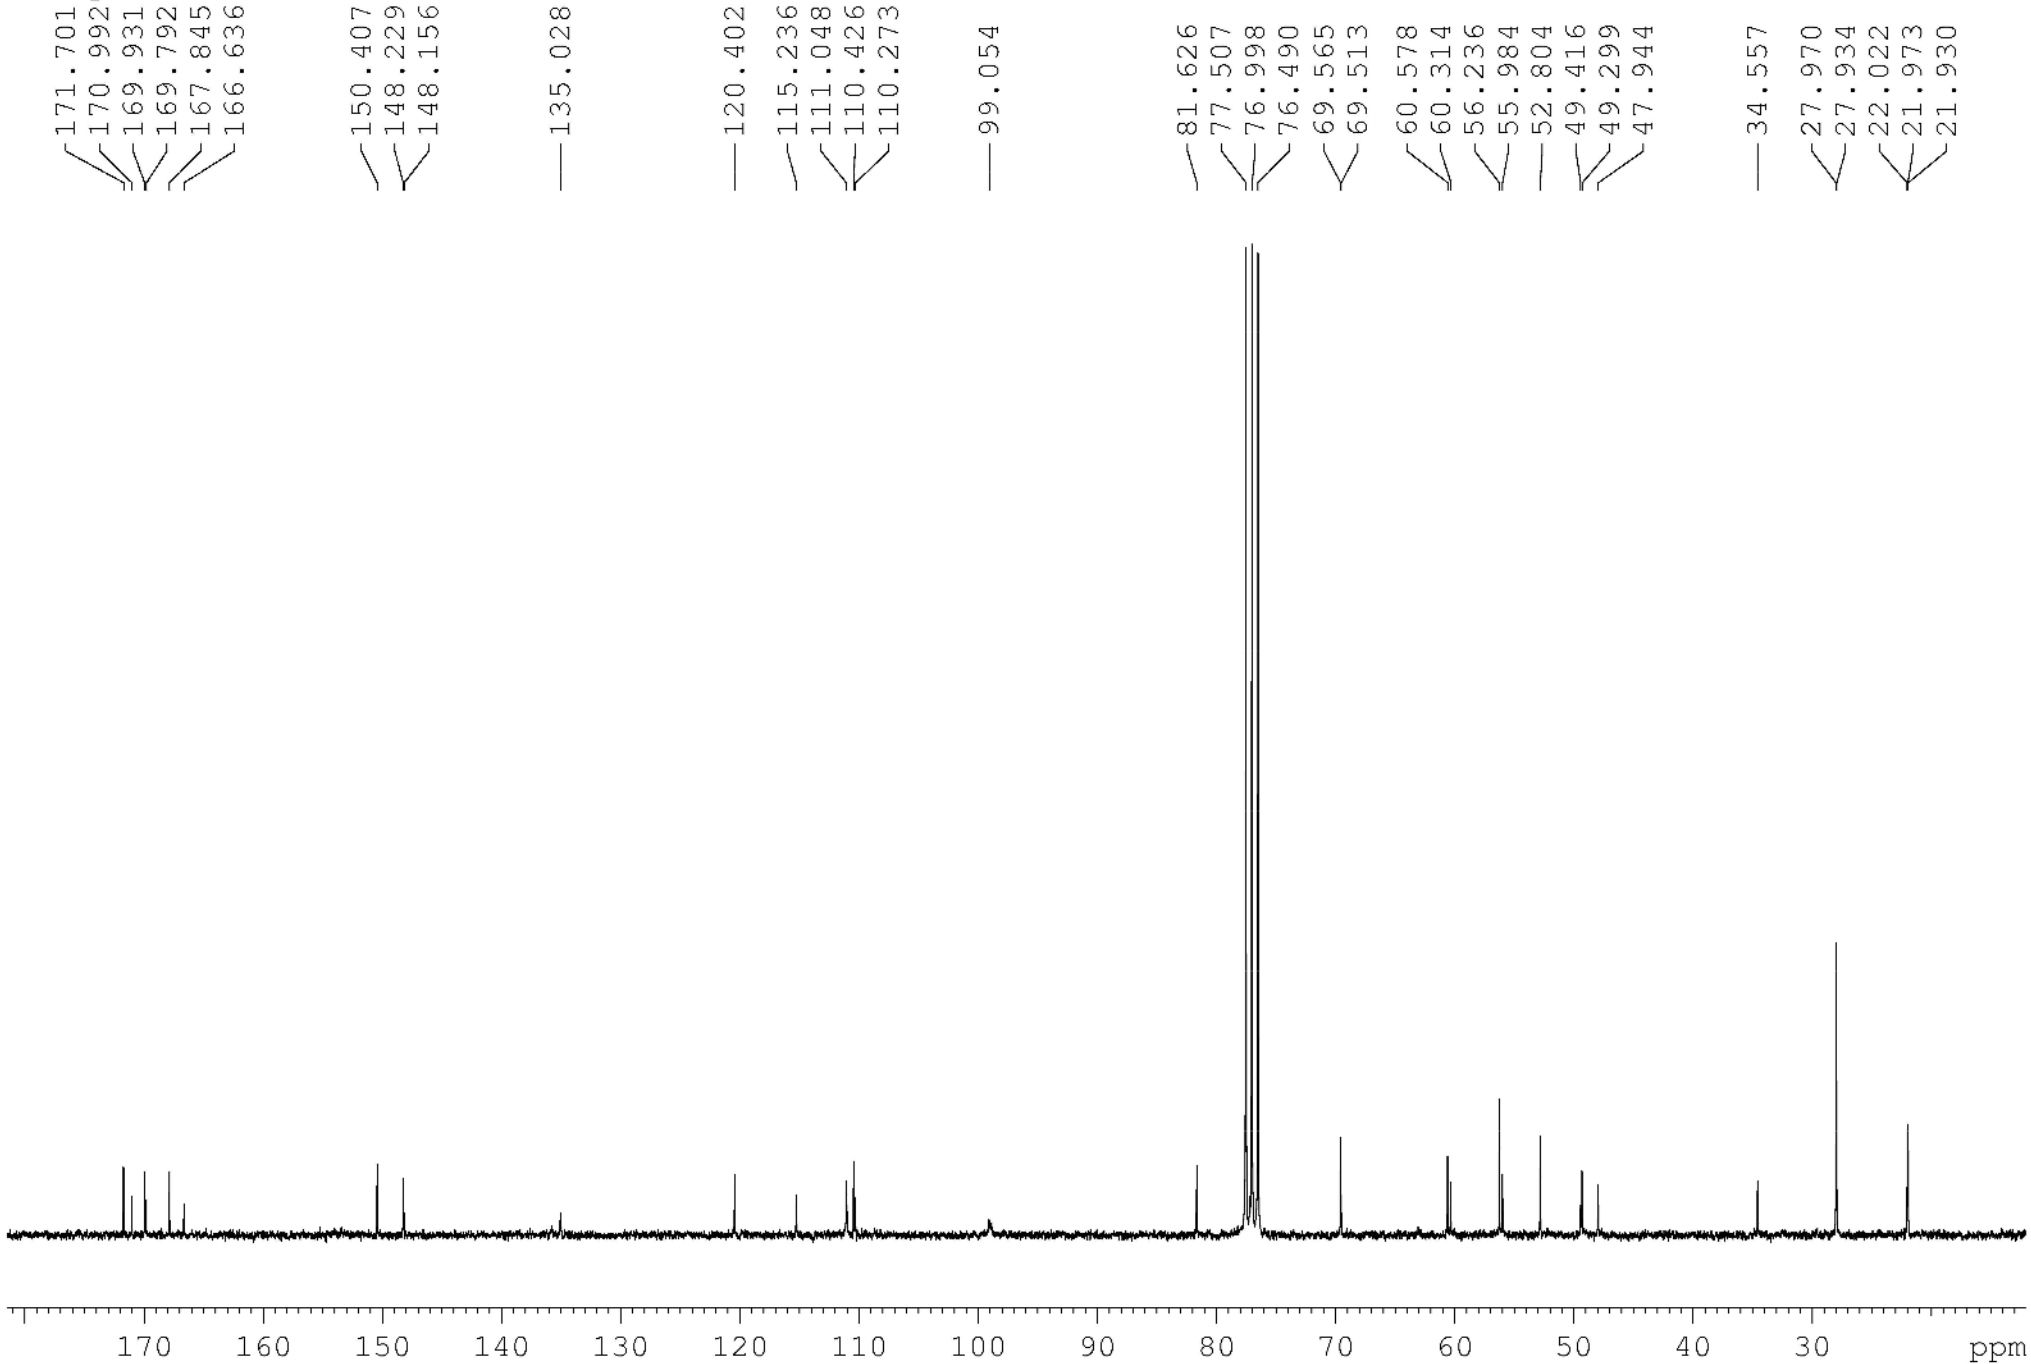

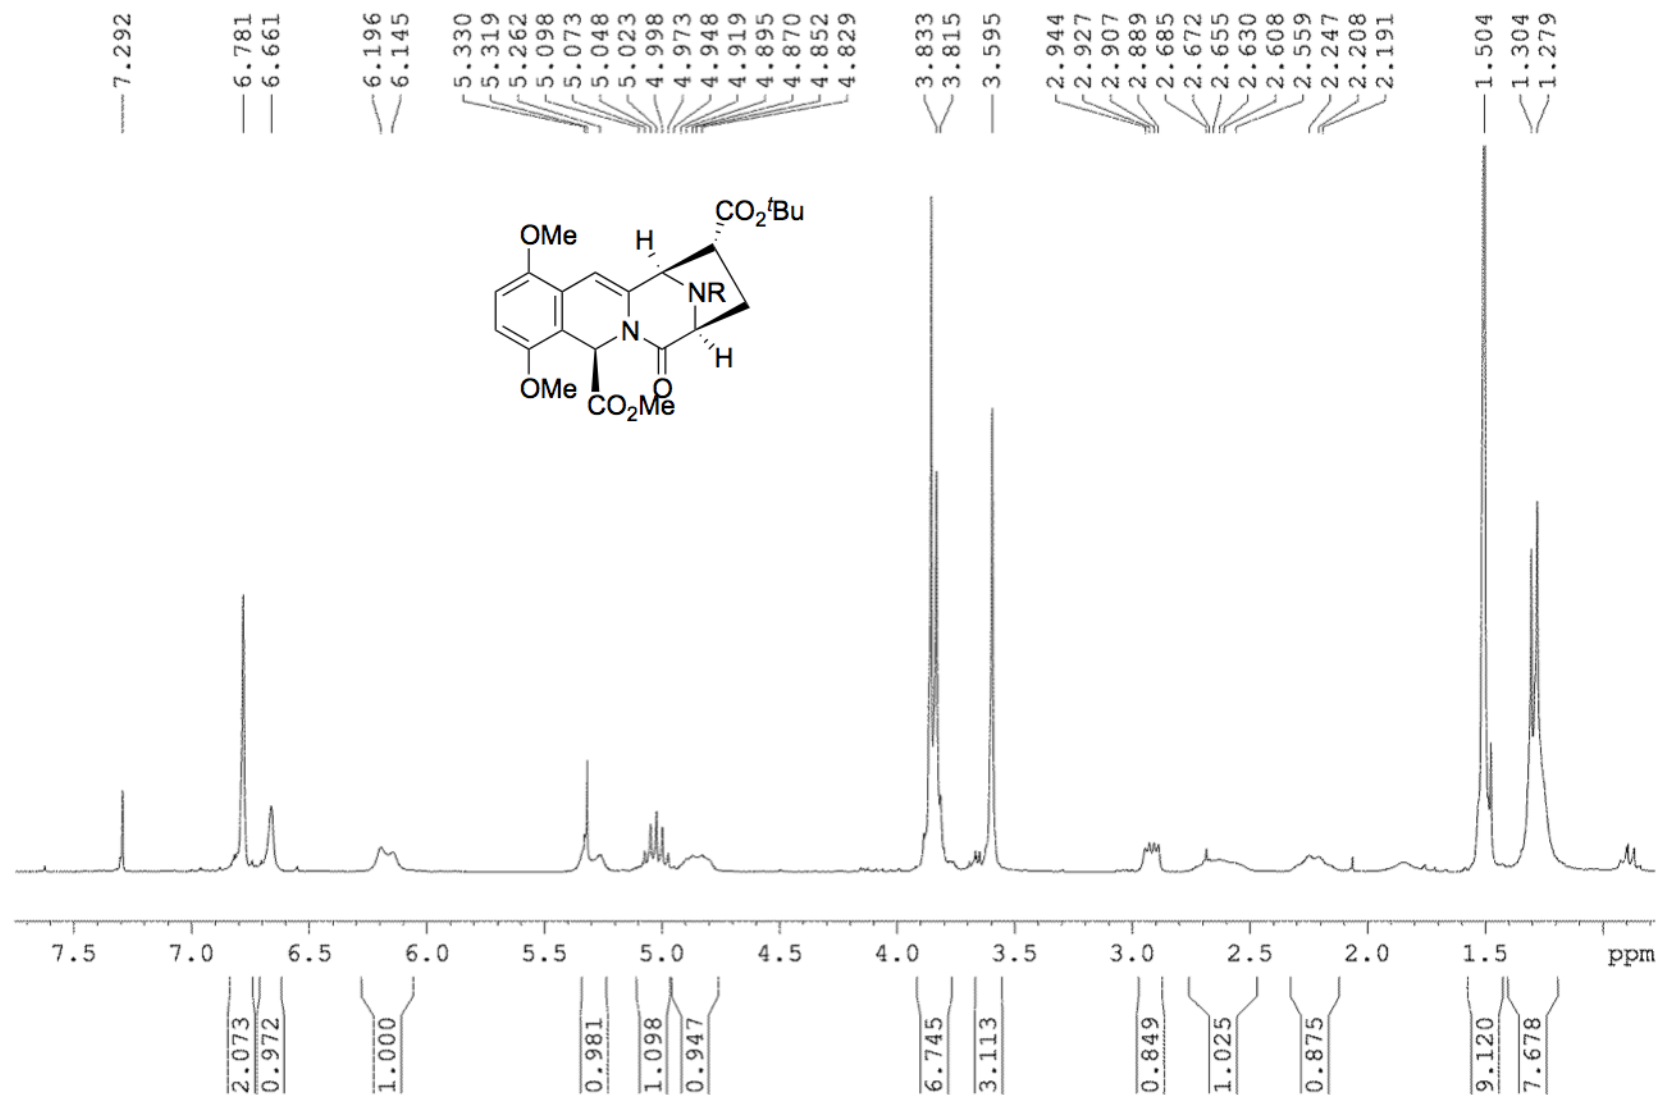

Compound 18

72

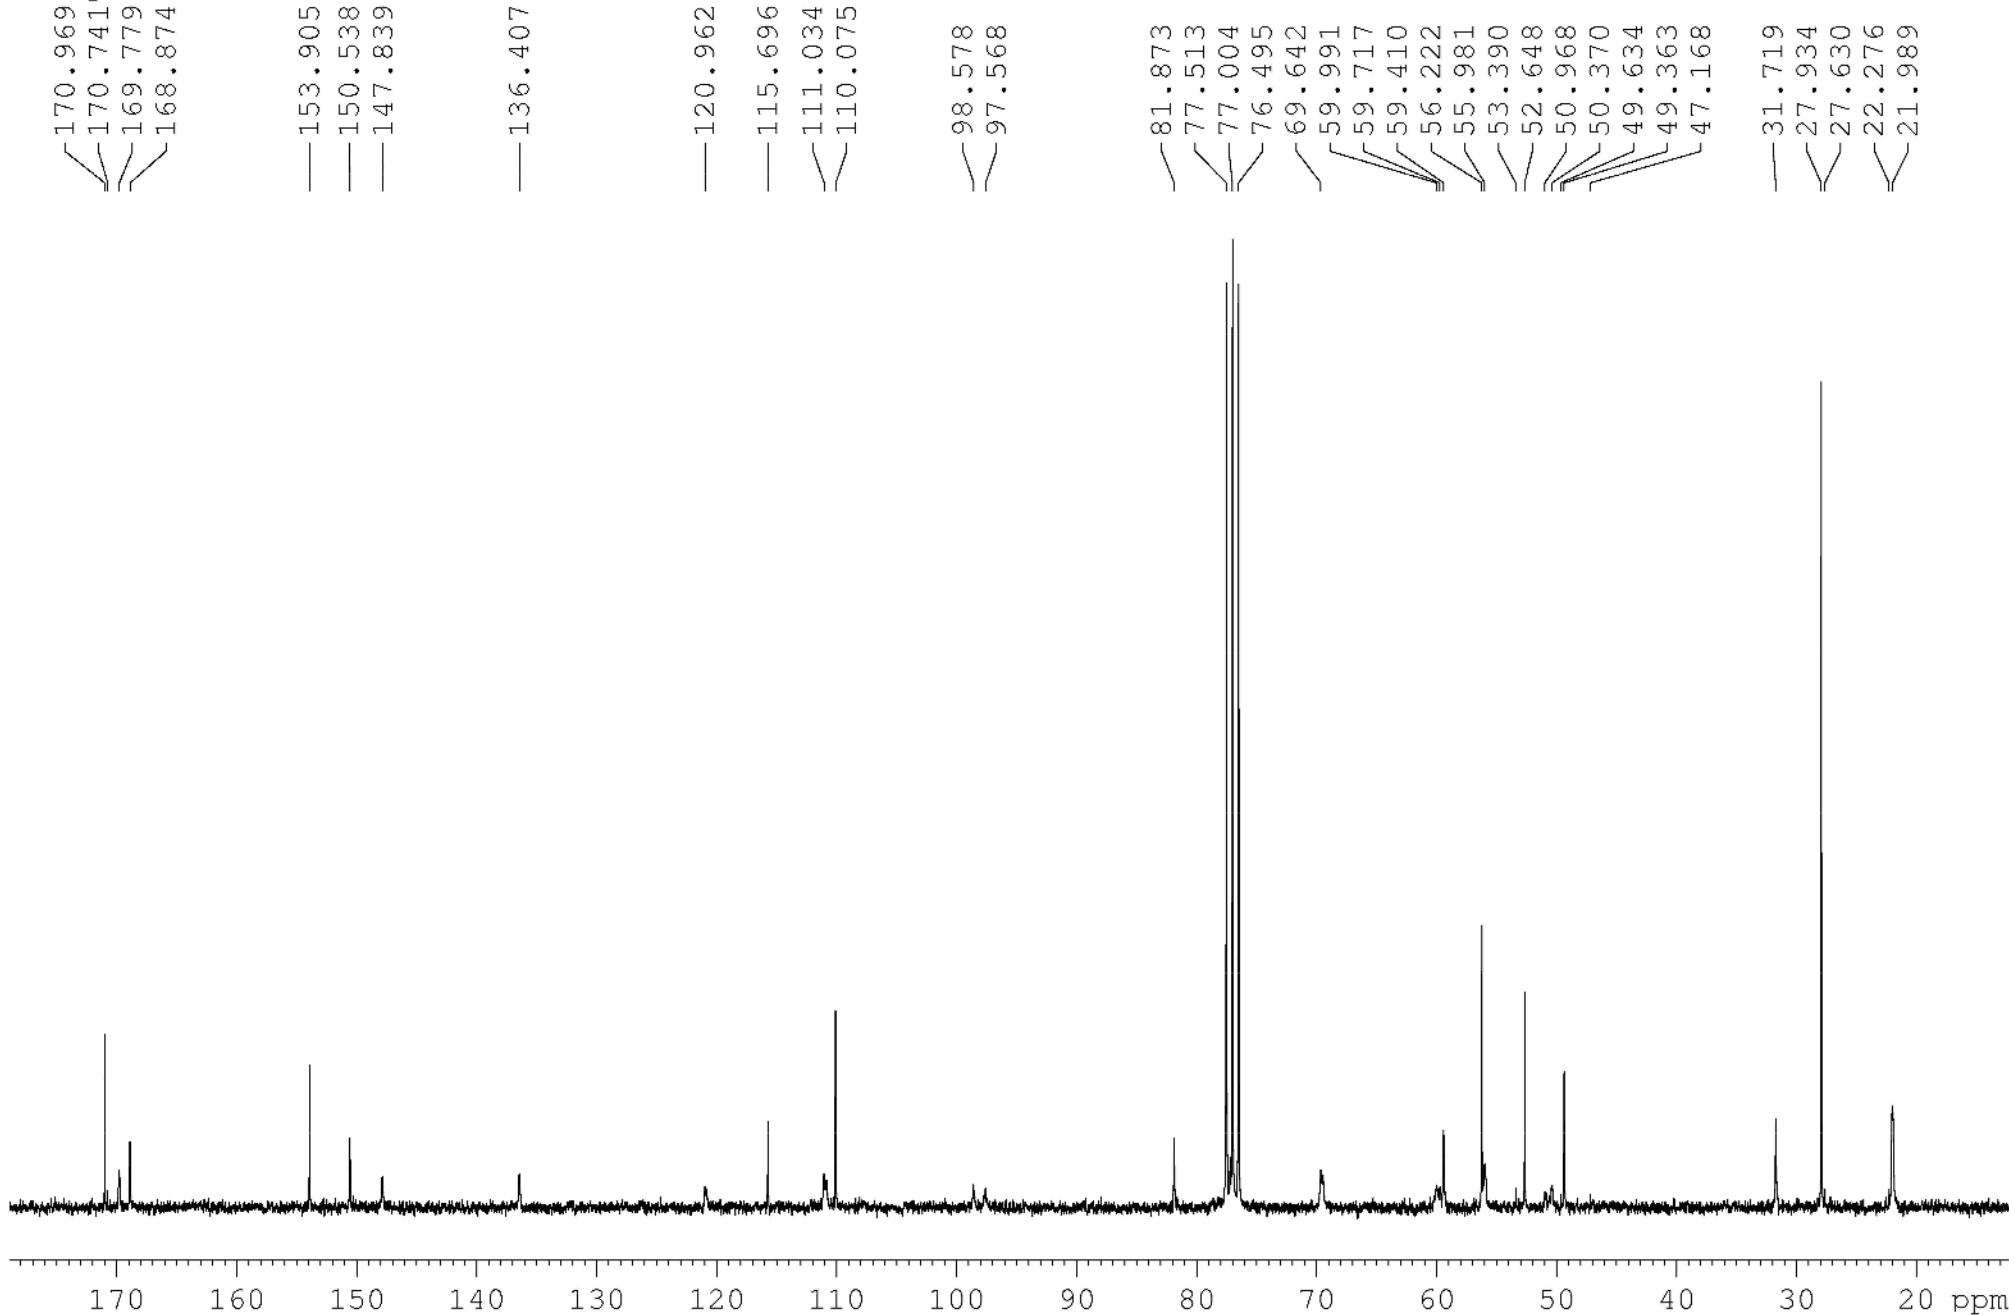

Compound 18

HRMS

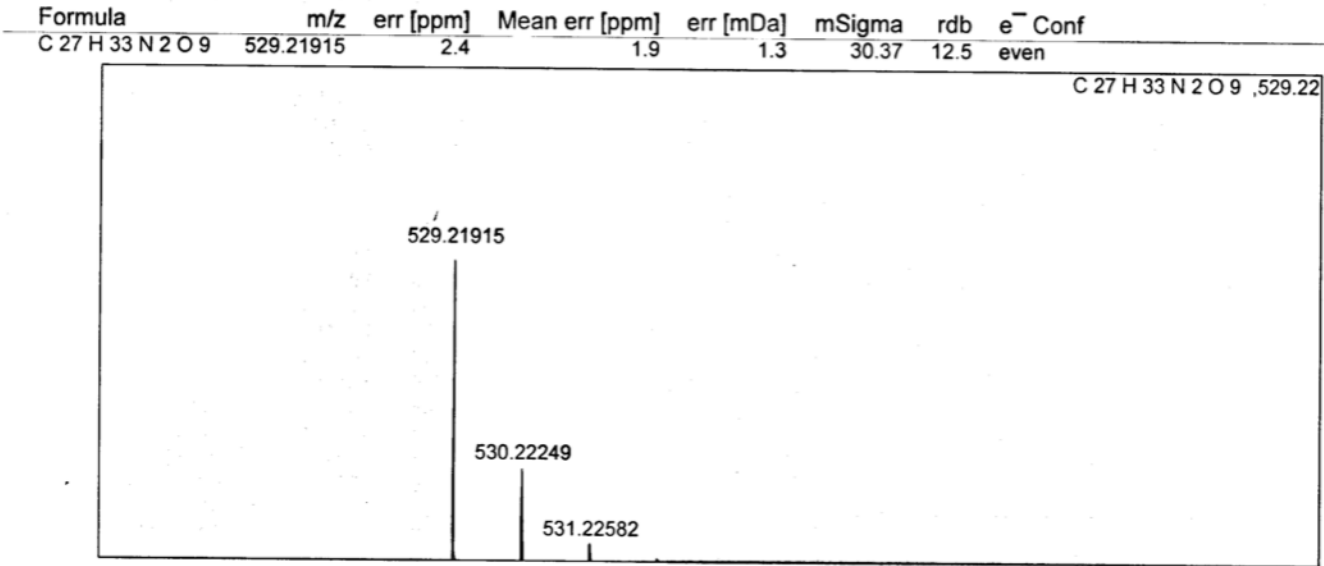

HMBC experiment of compound 18

74

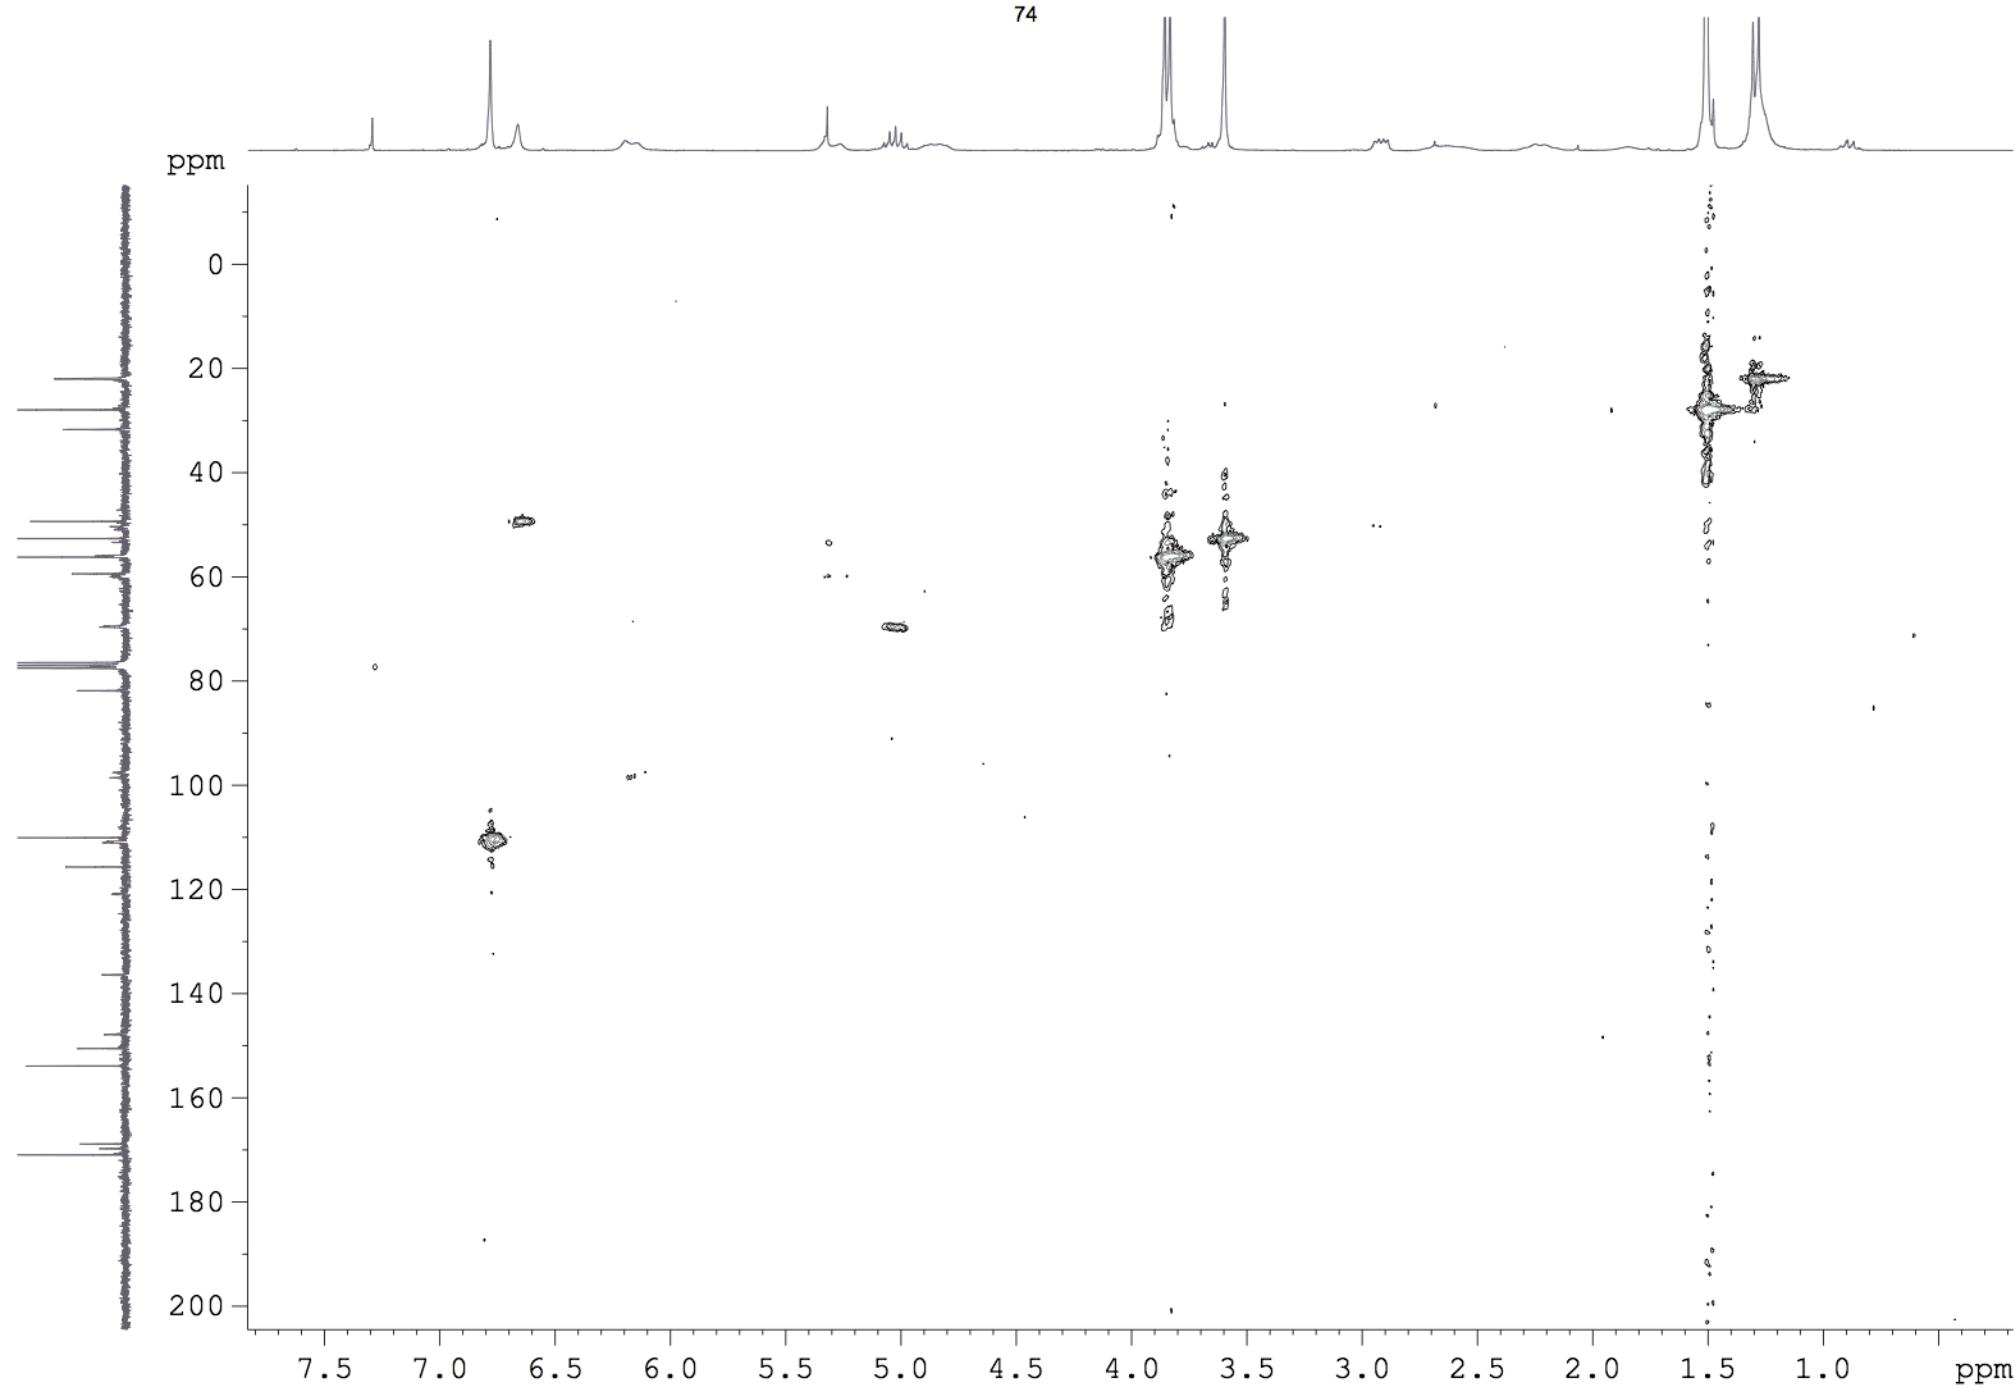



75

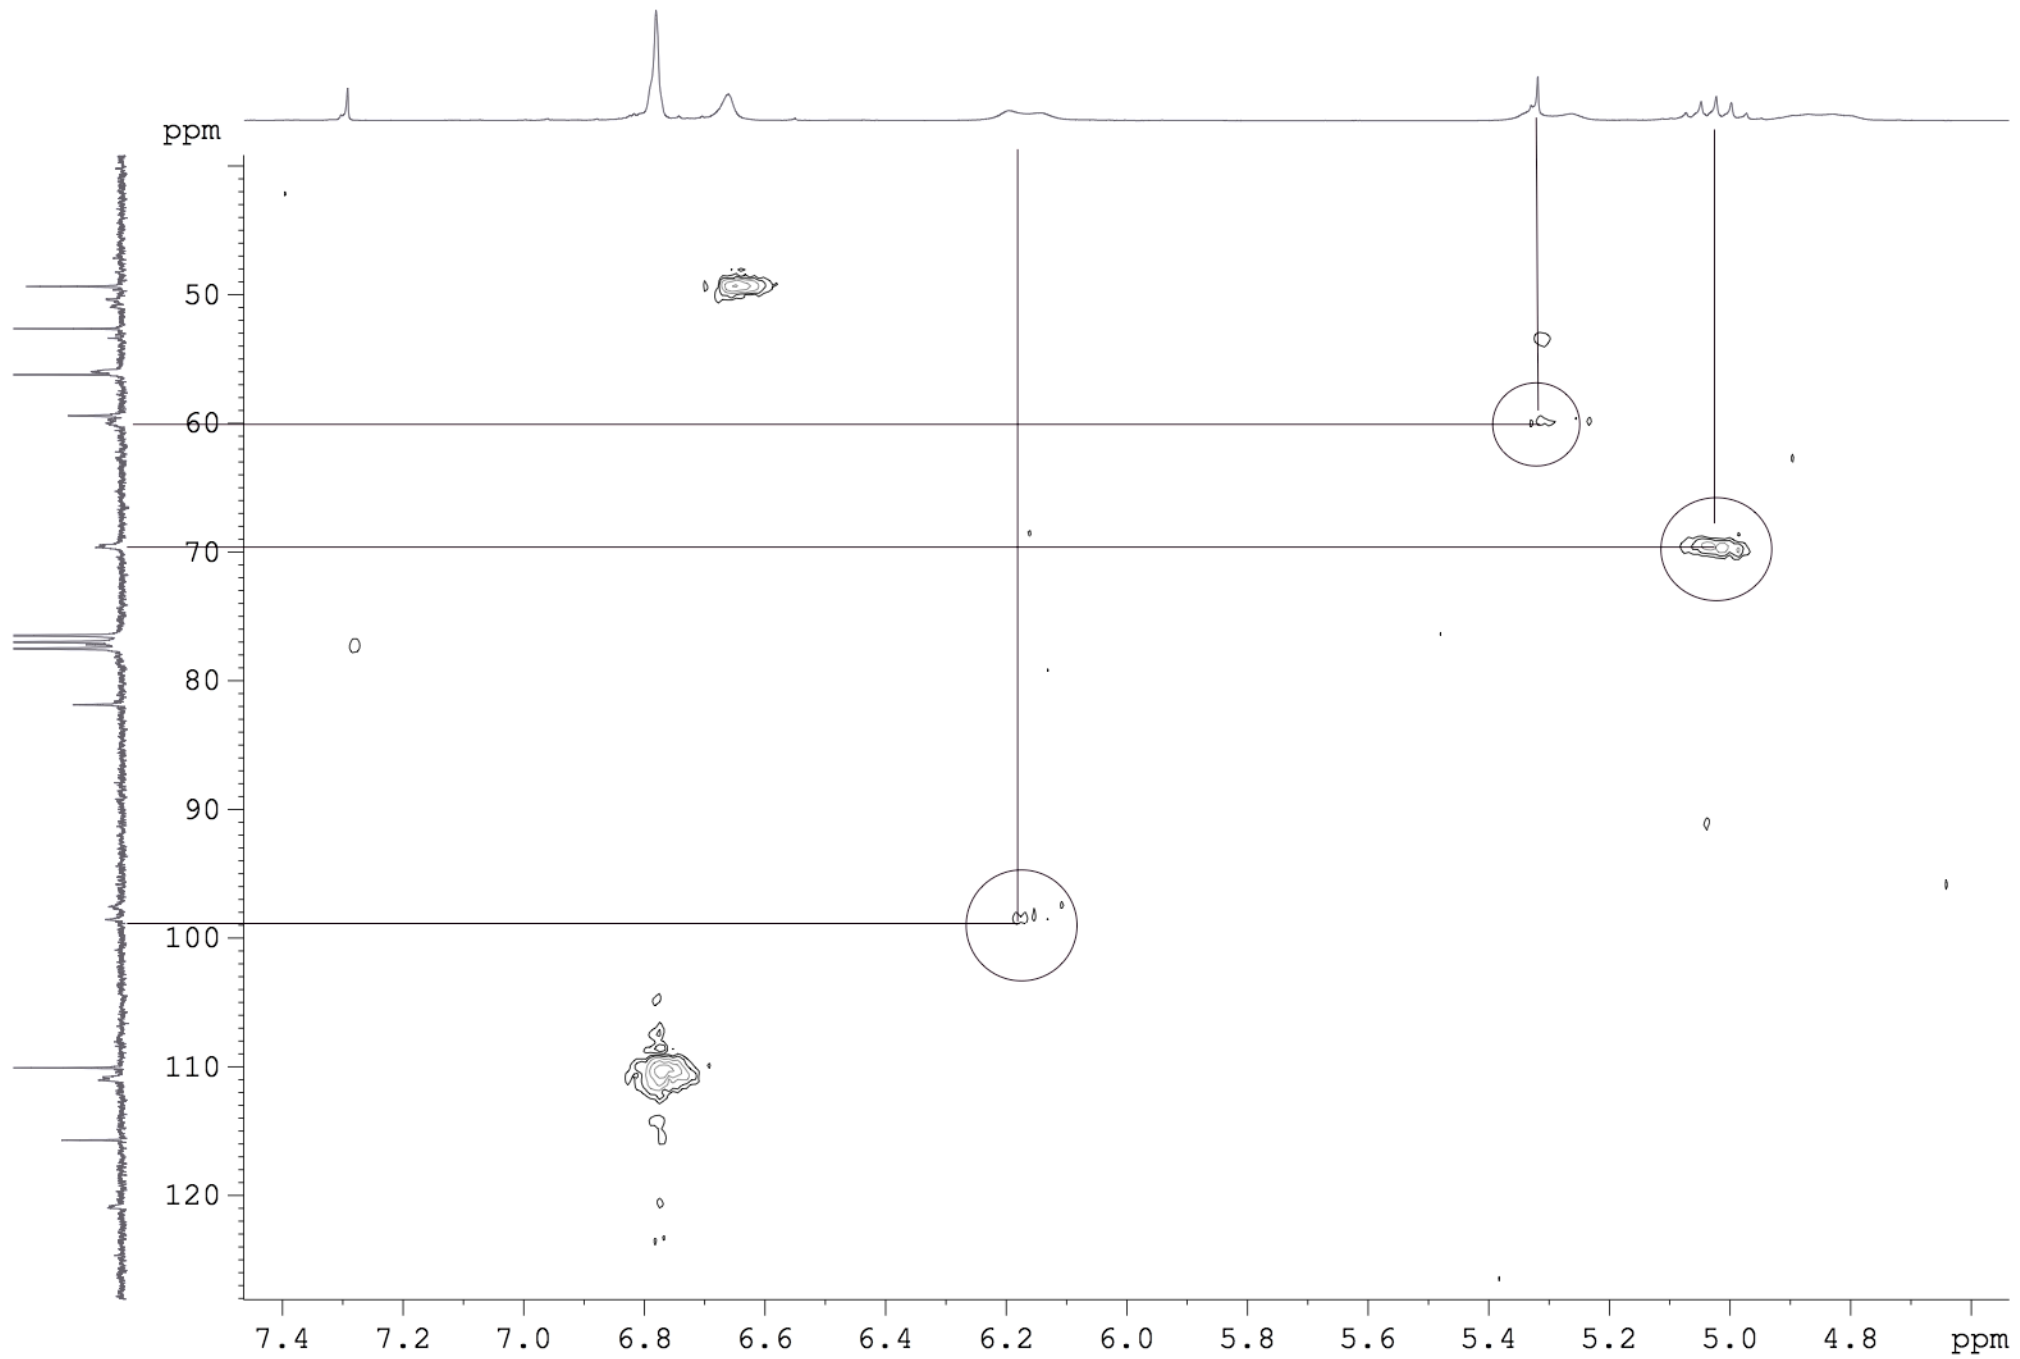

Compound 19 and 20

76

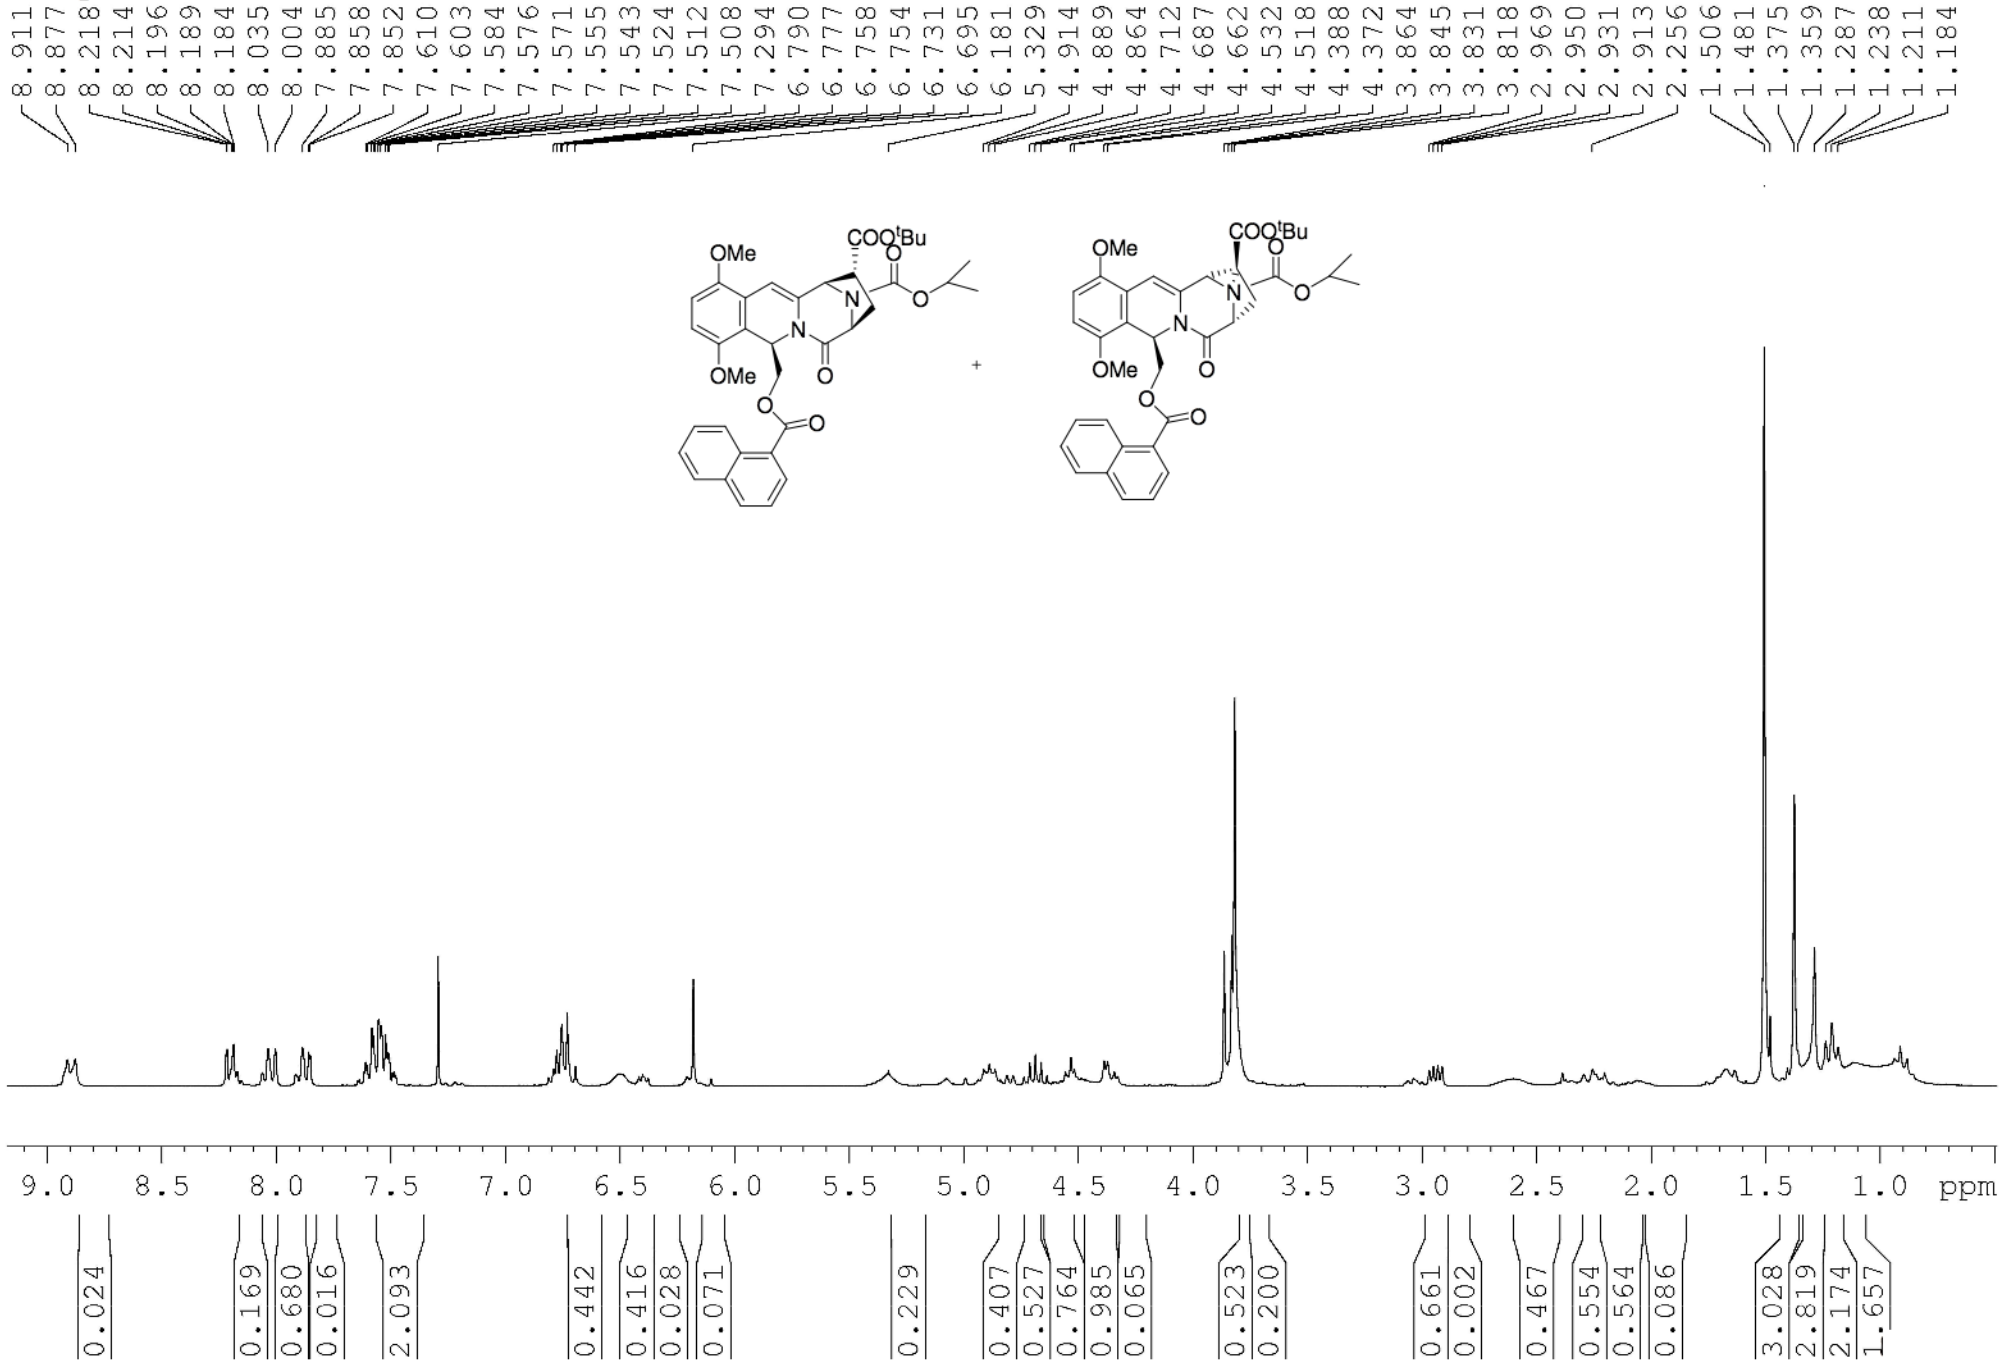

Compound 19 and 20

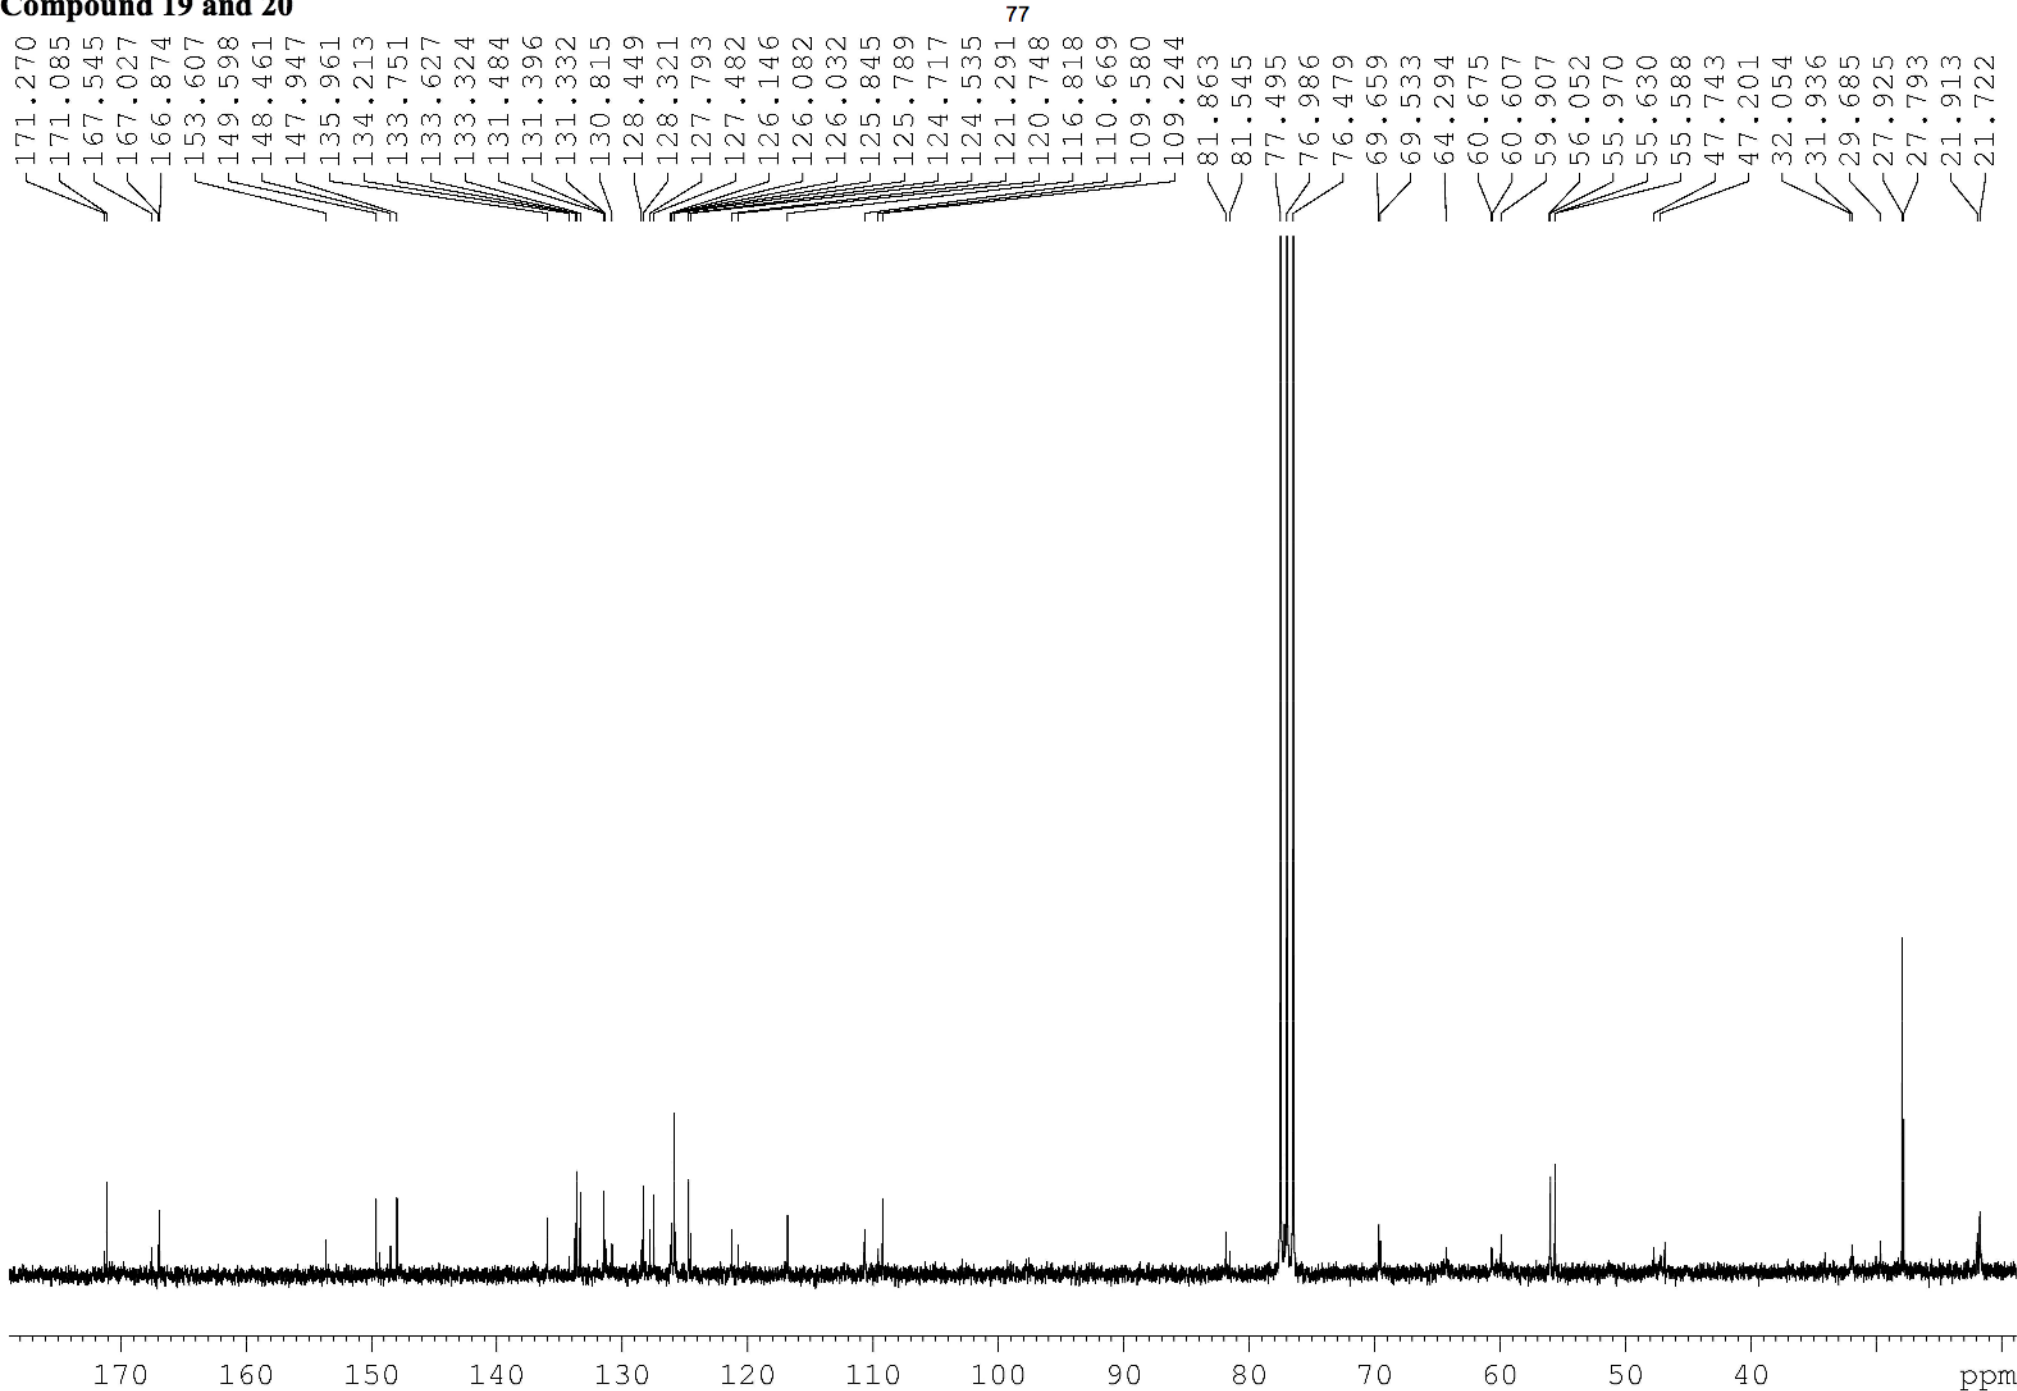

Compound 19 + 20

HRMS



**Compound 21**

79

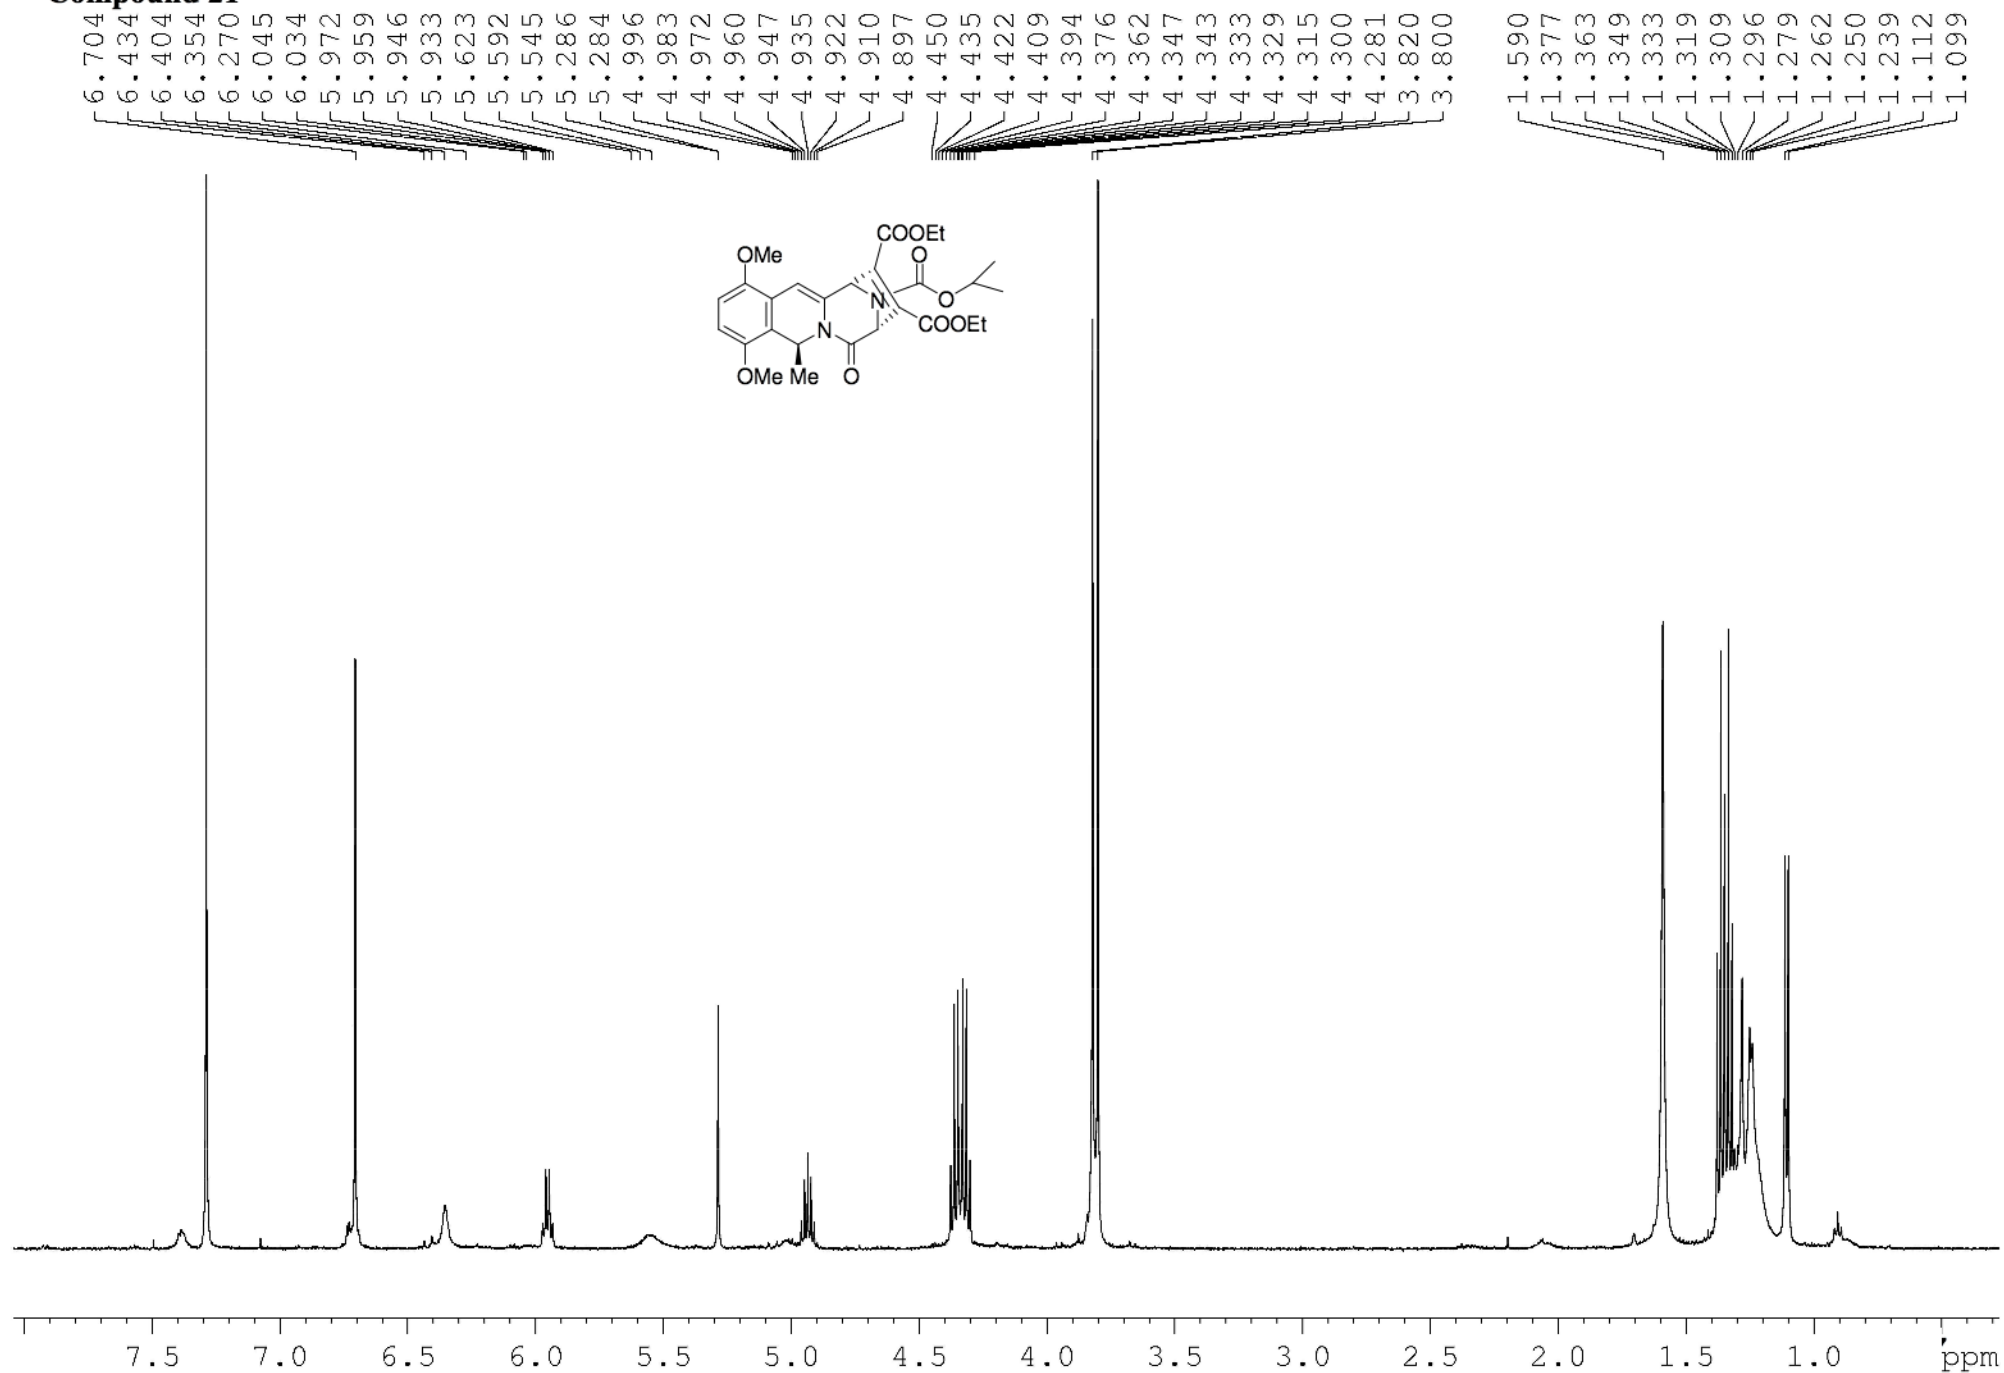

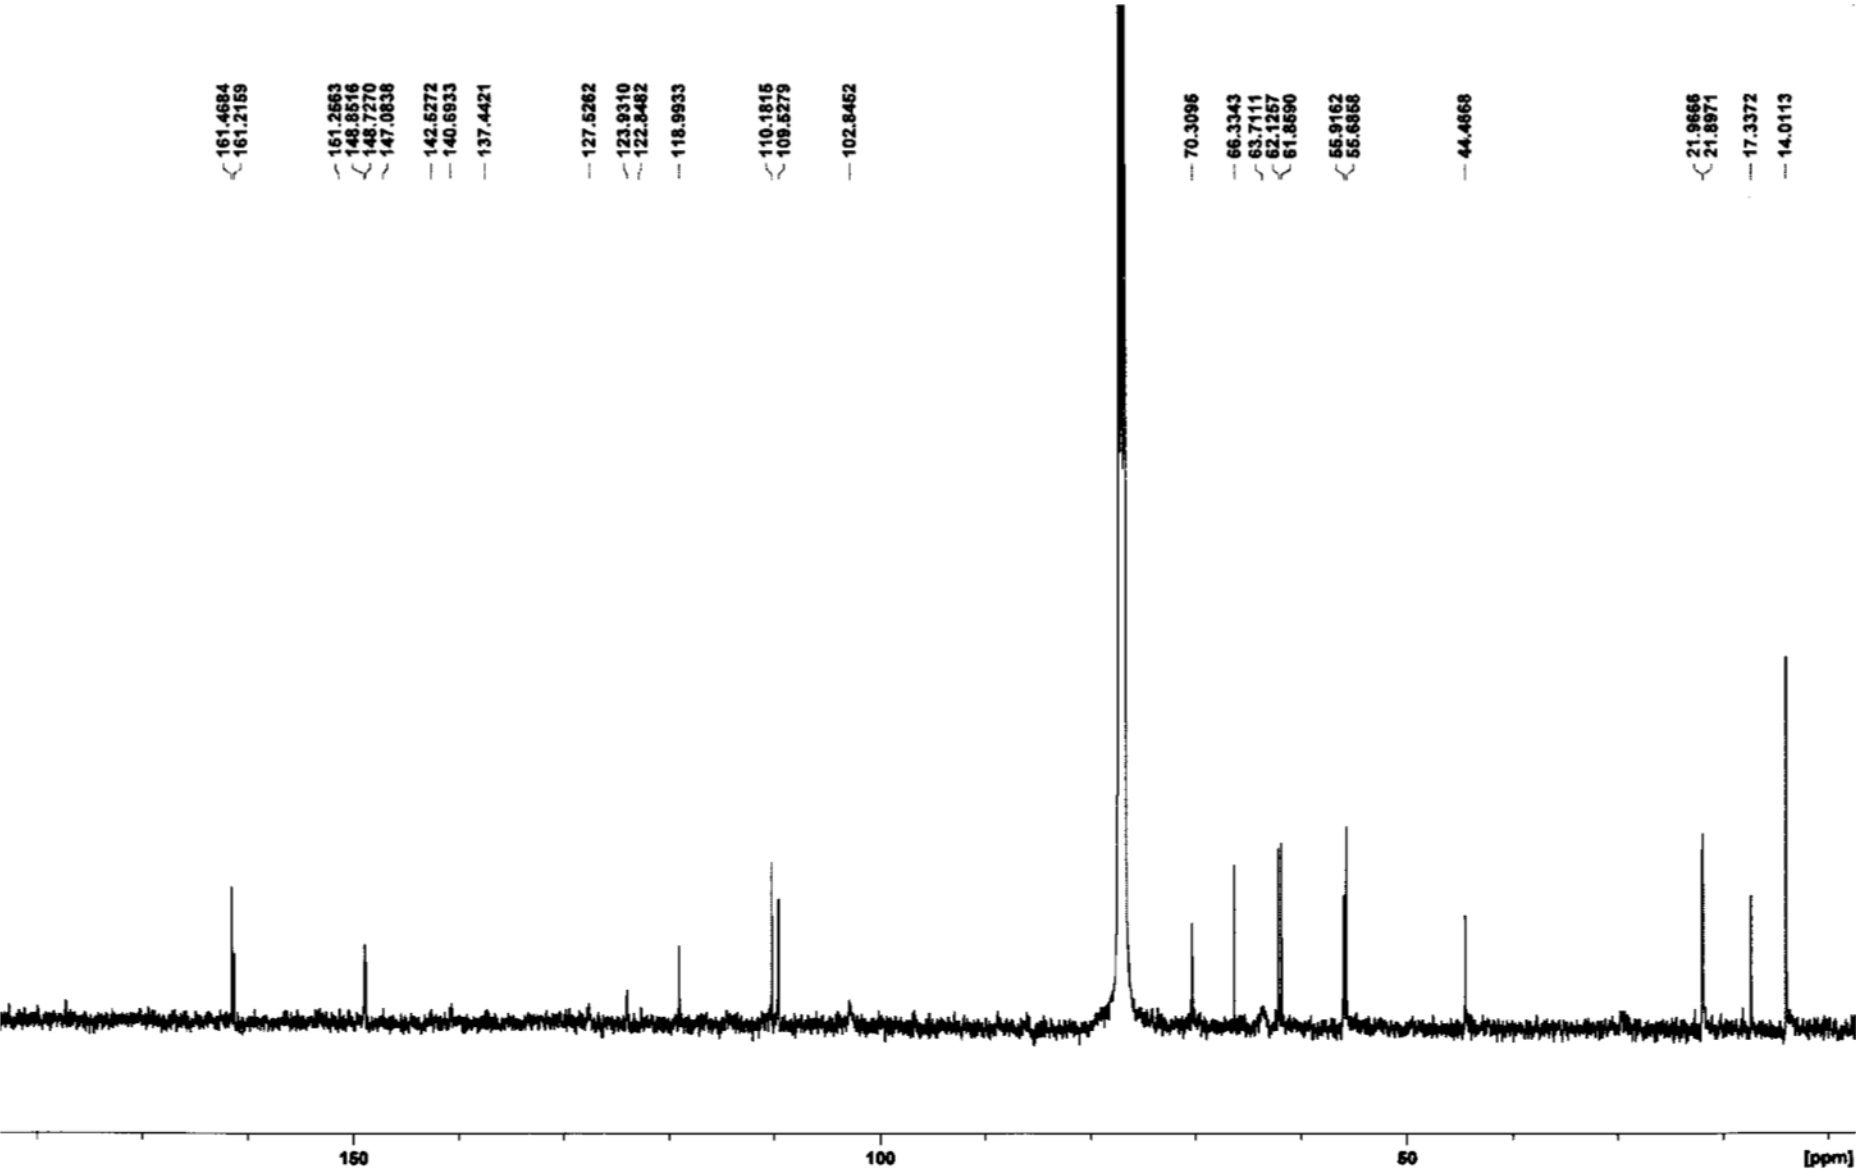

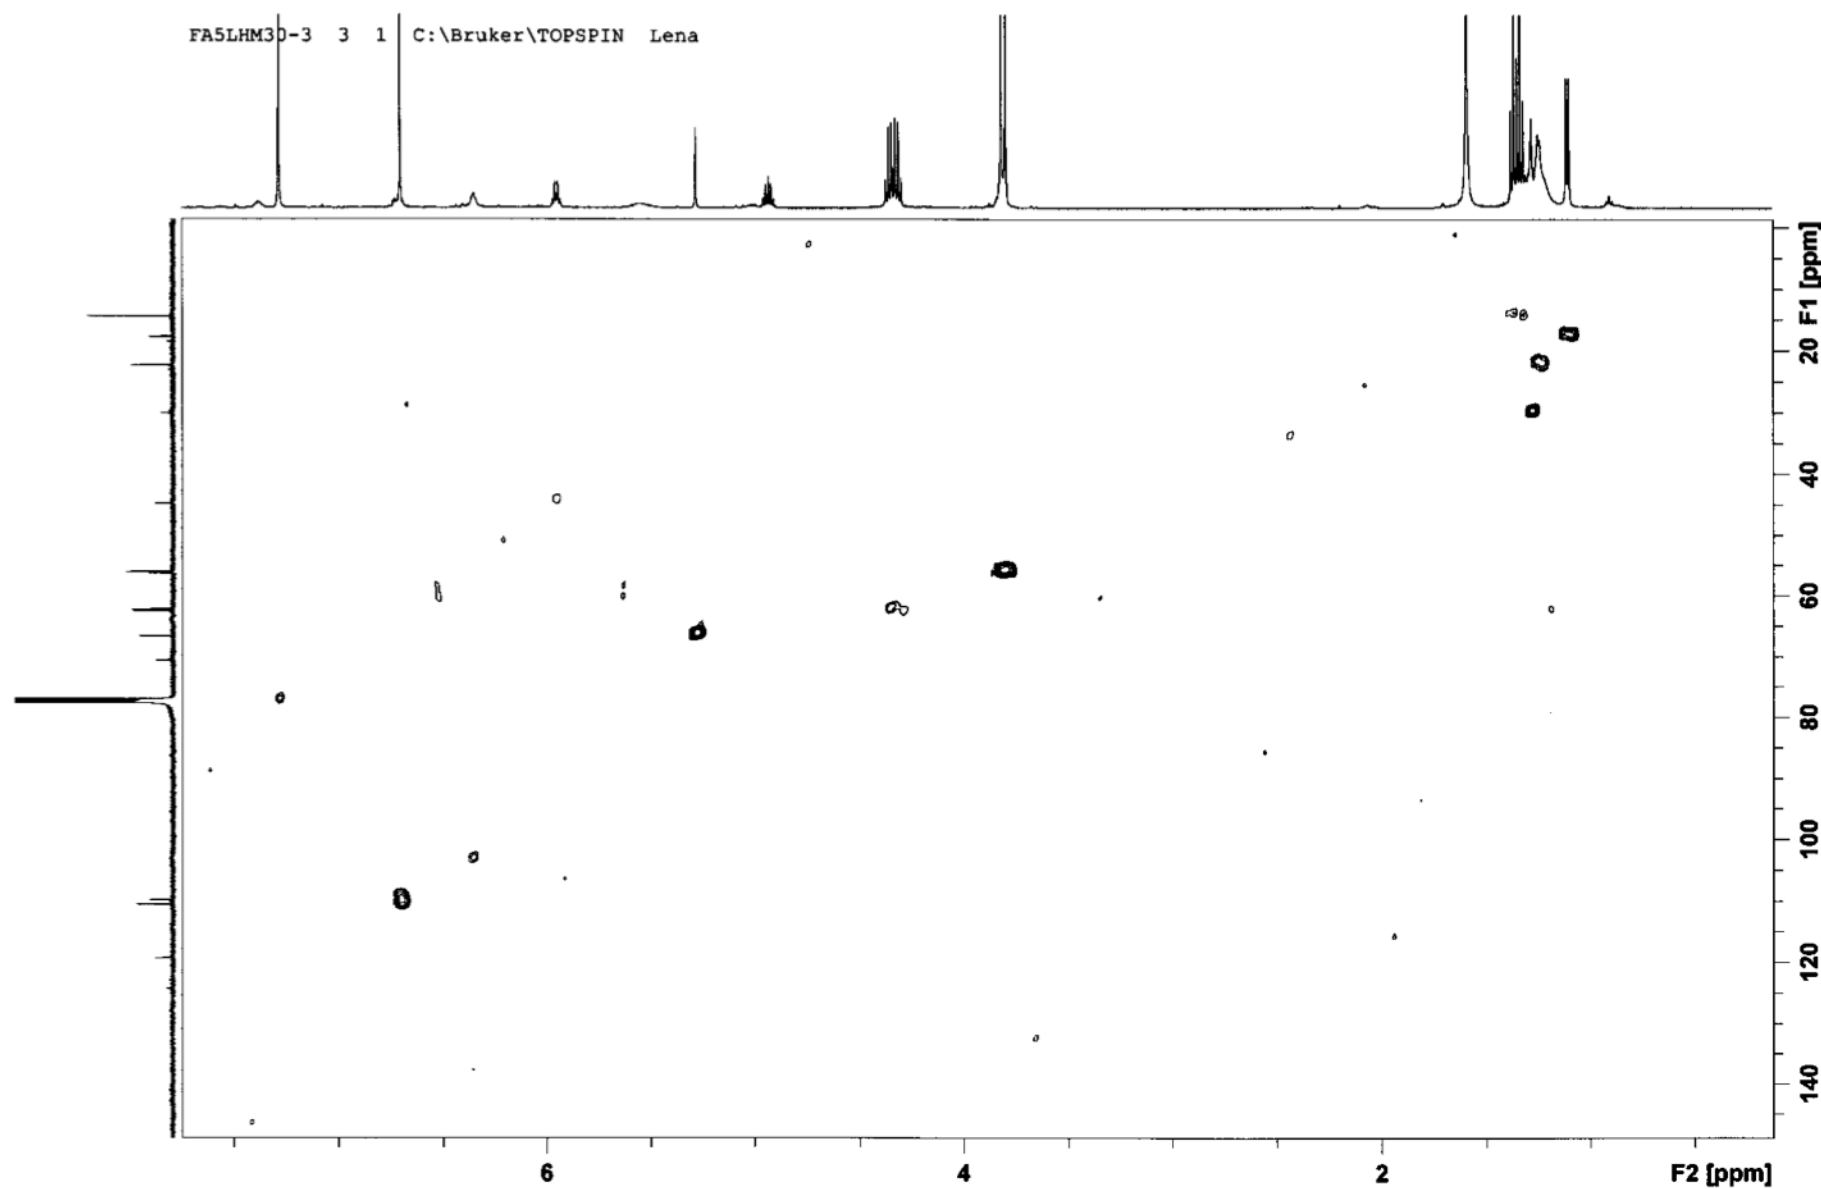

Compound 21

HRMS

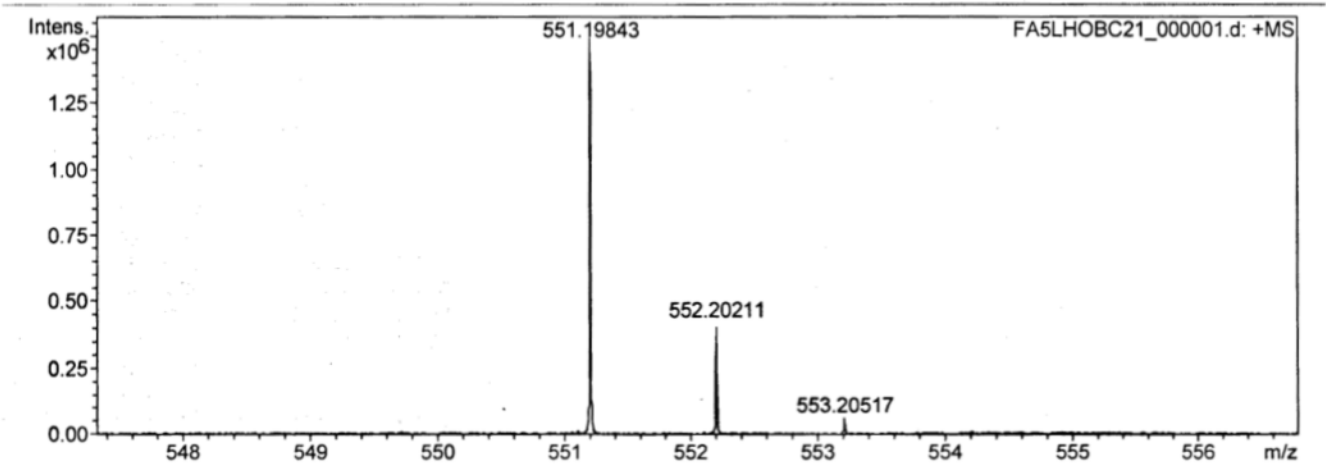



Compound 22

83

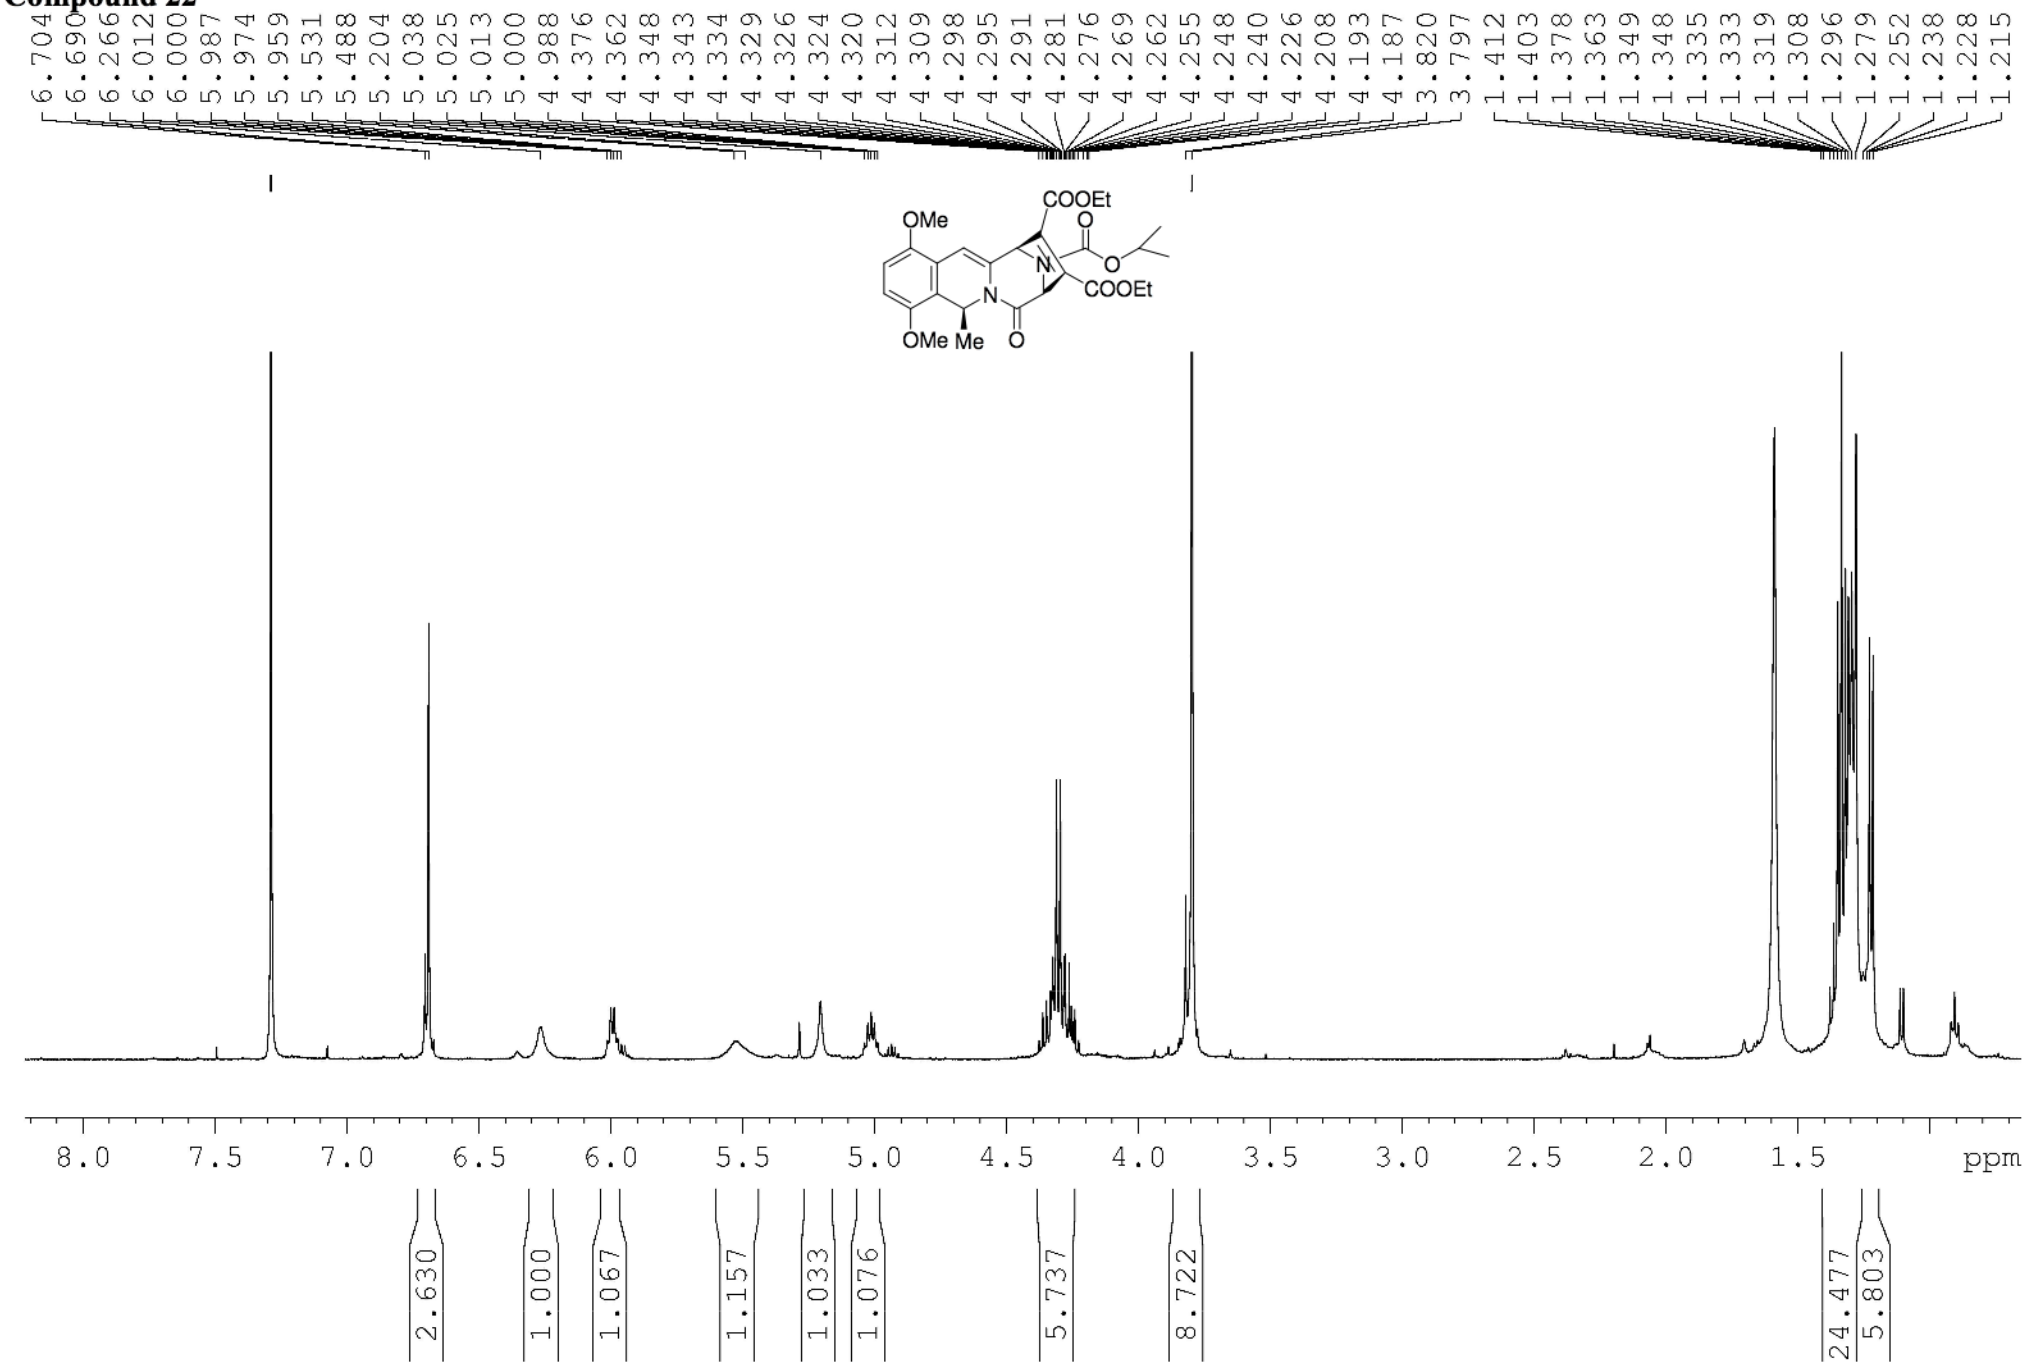

Compound 22

84

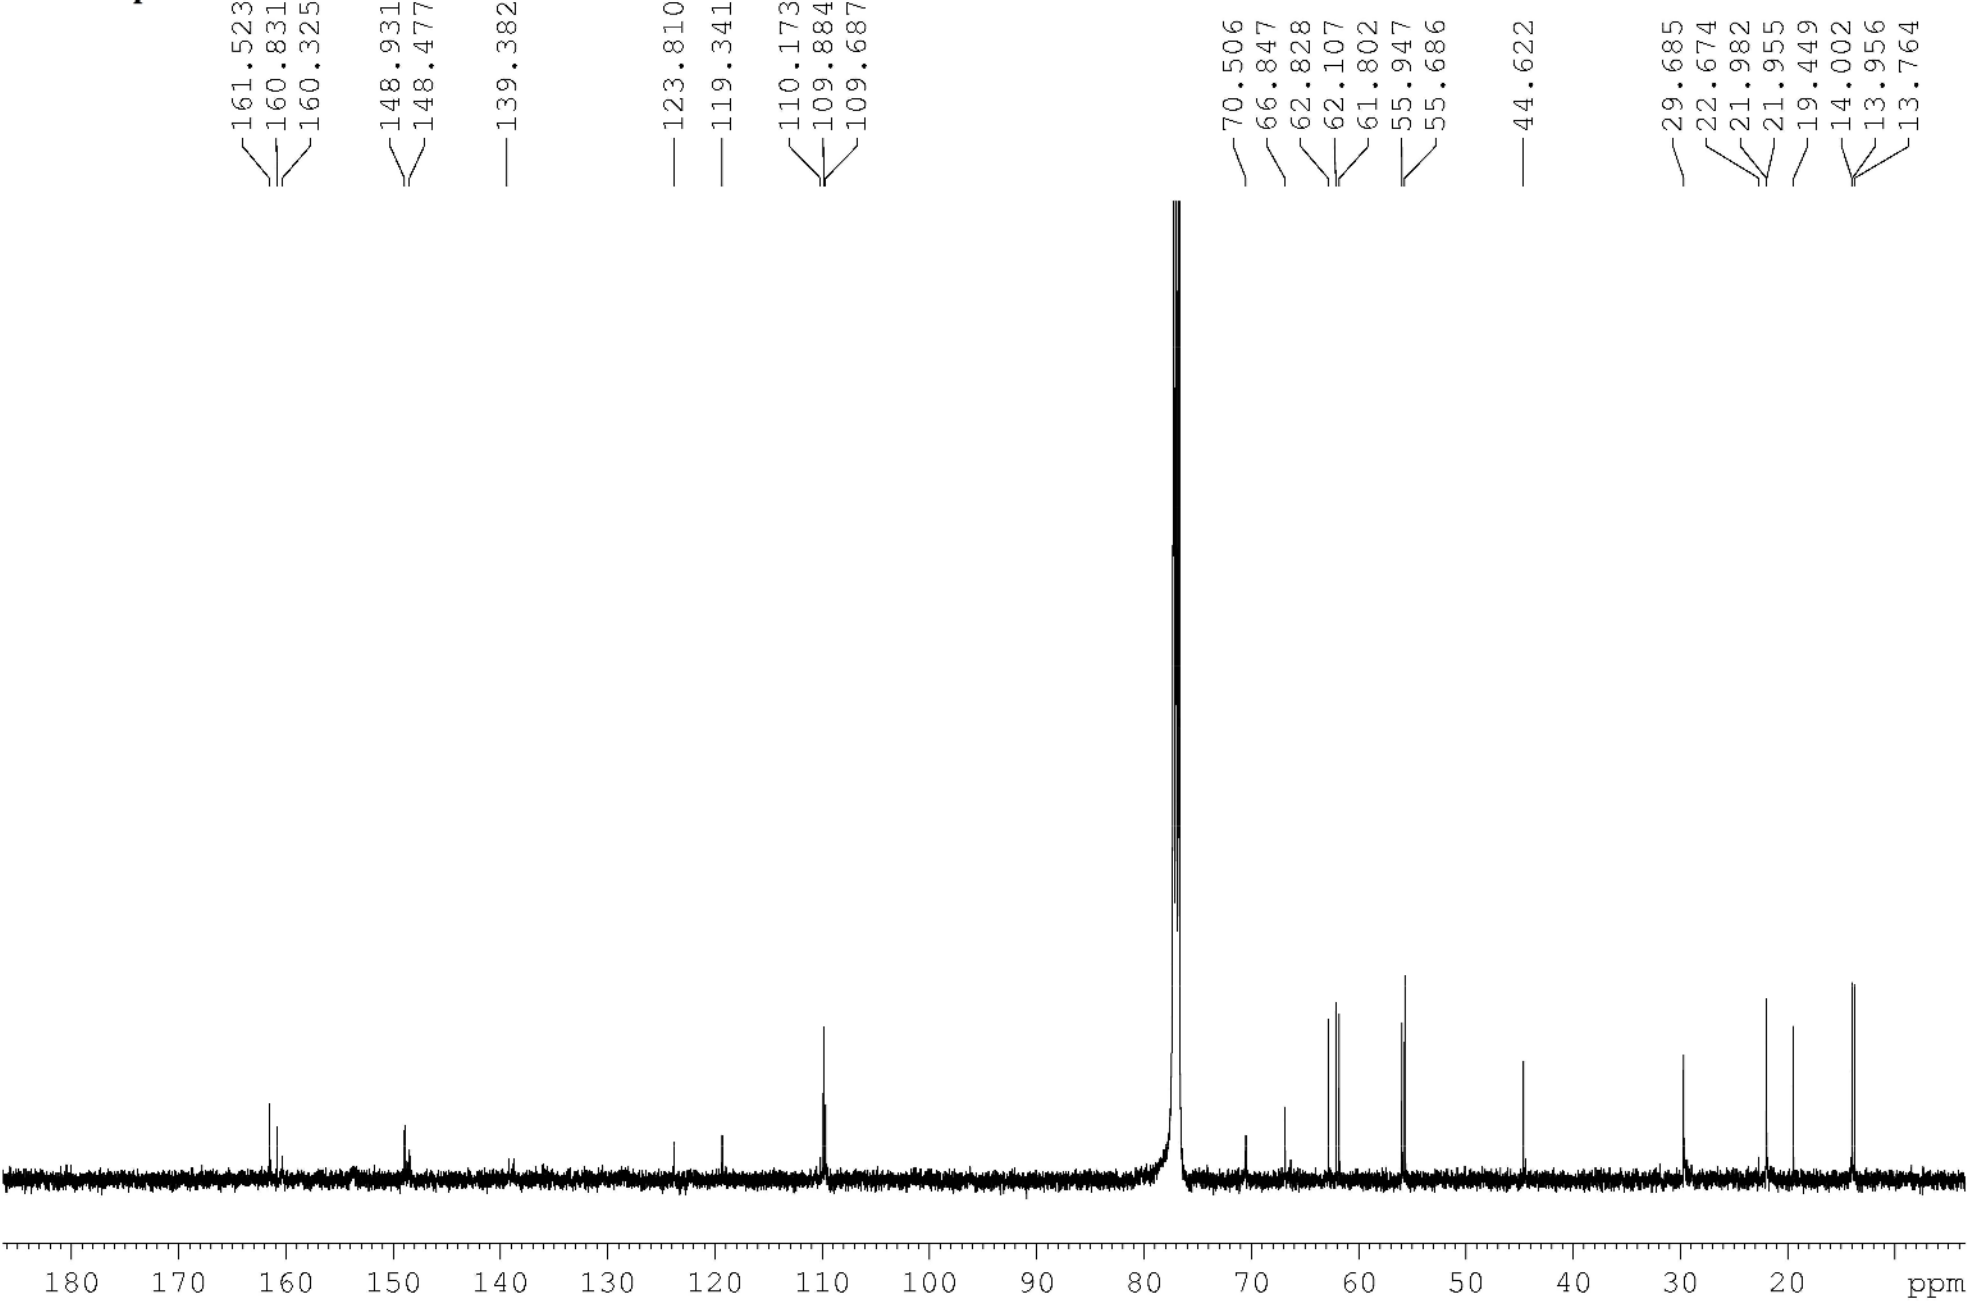

Compound 23 and 24

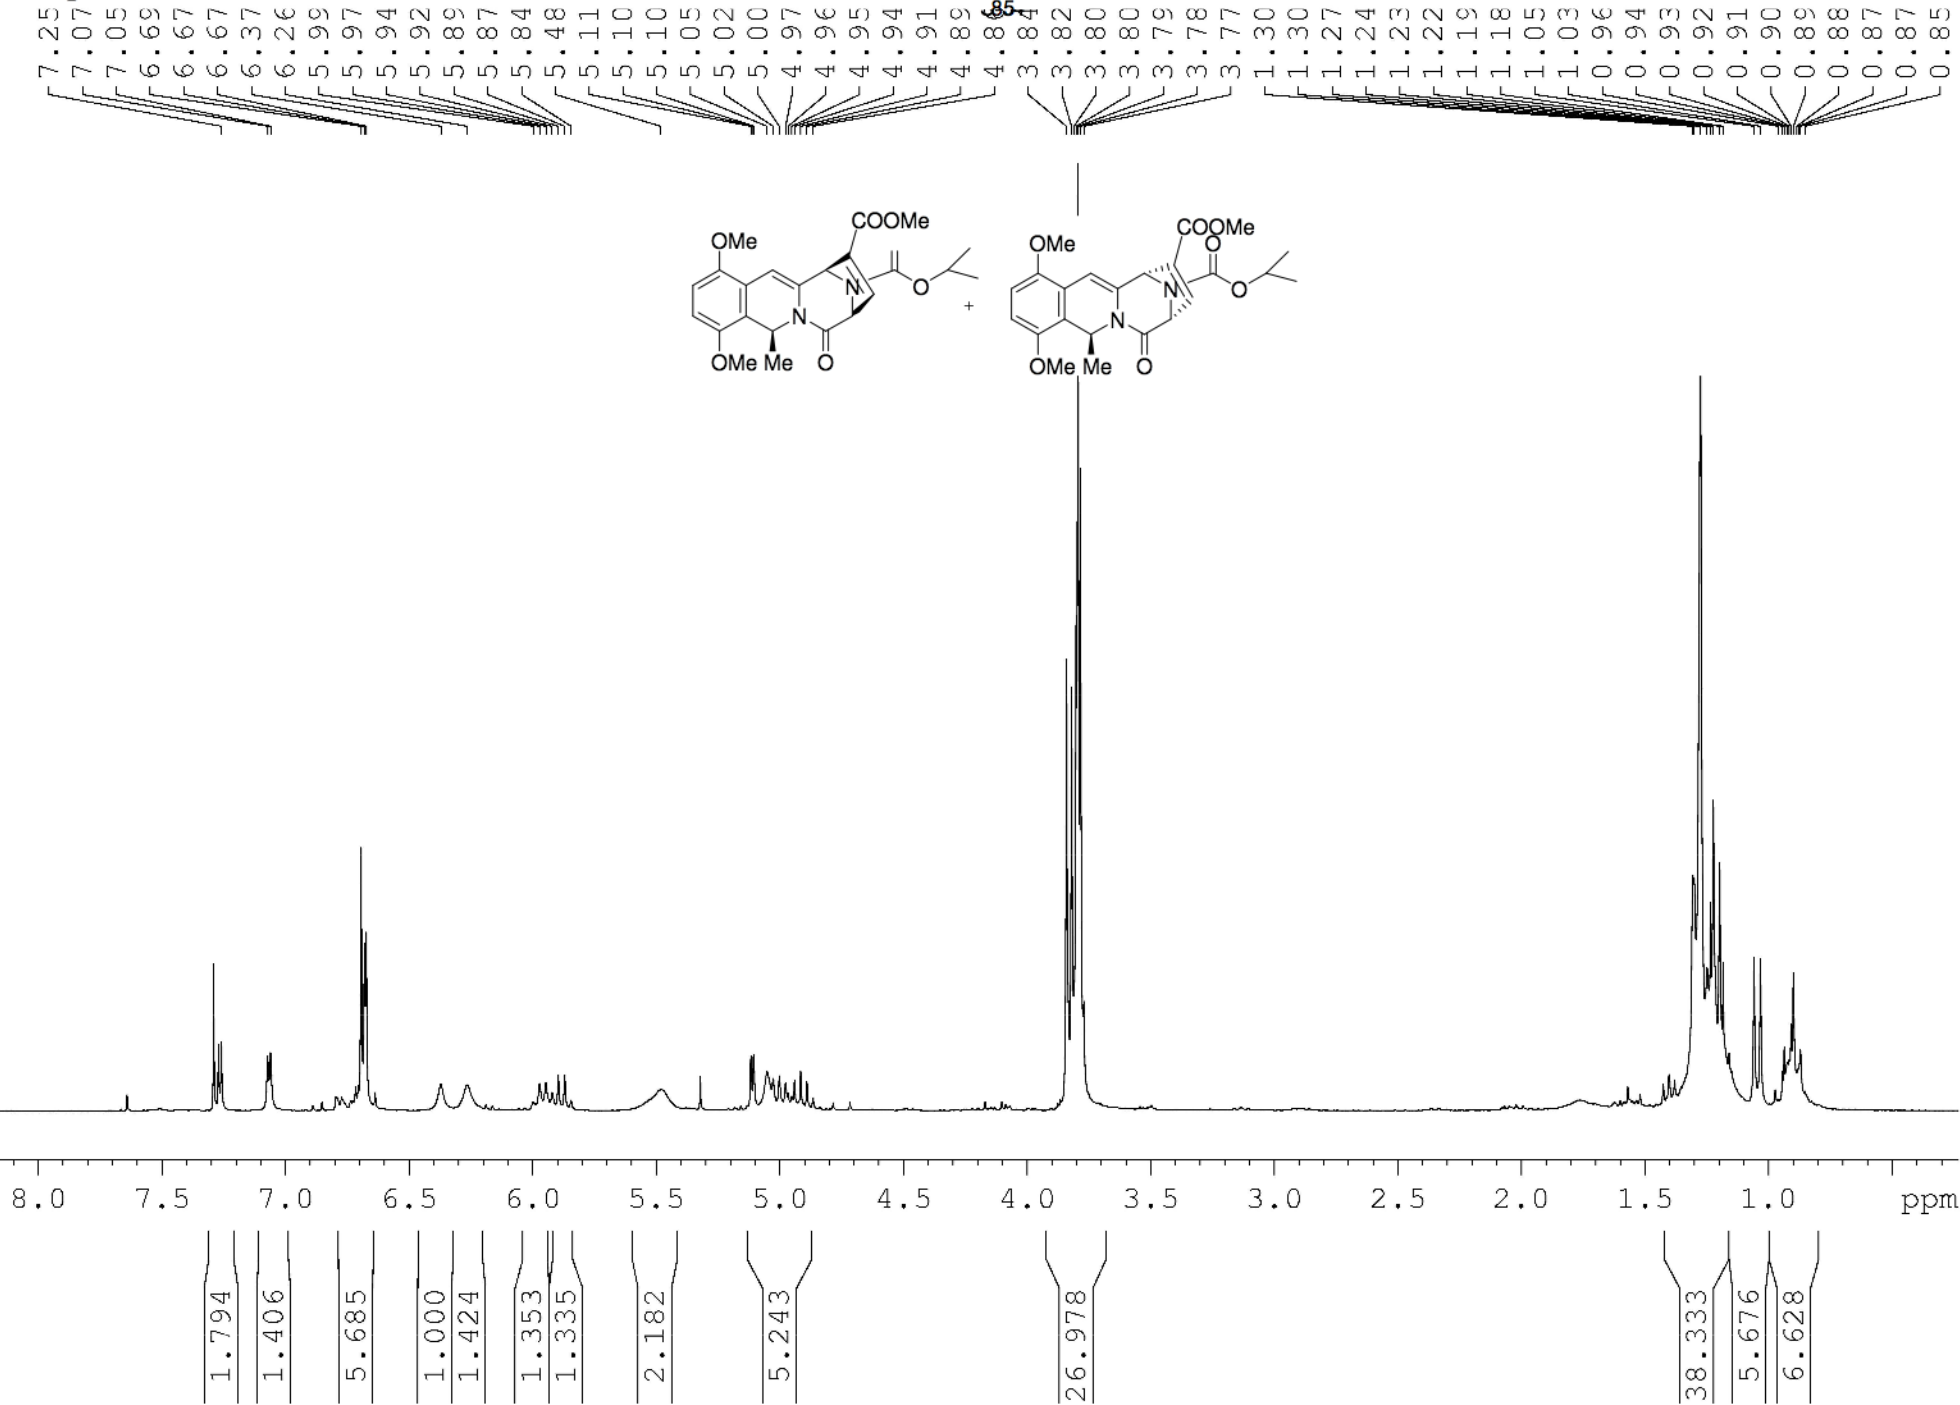

Compound 23 and 24

86

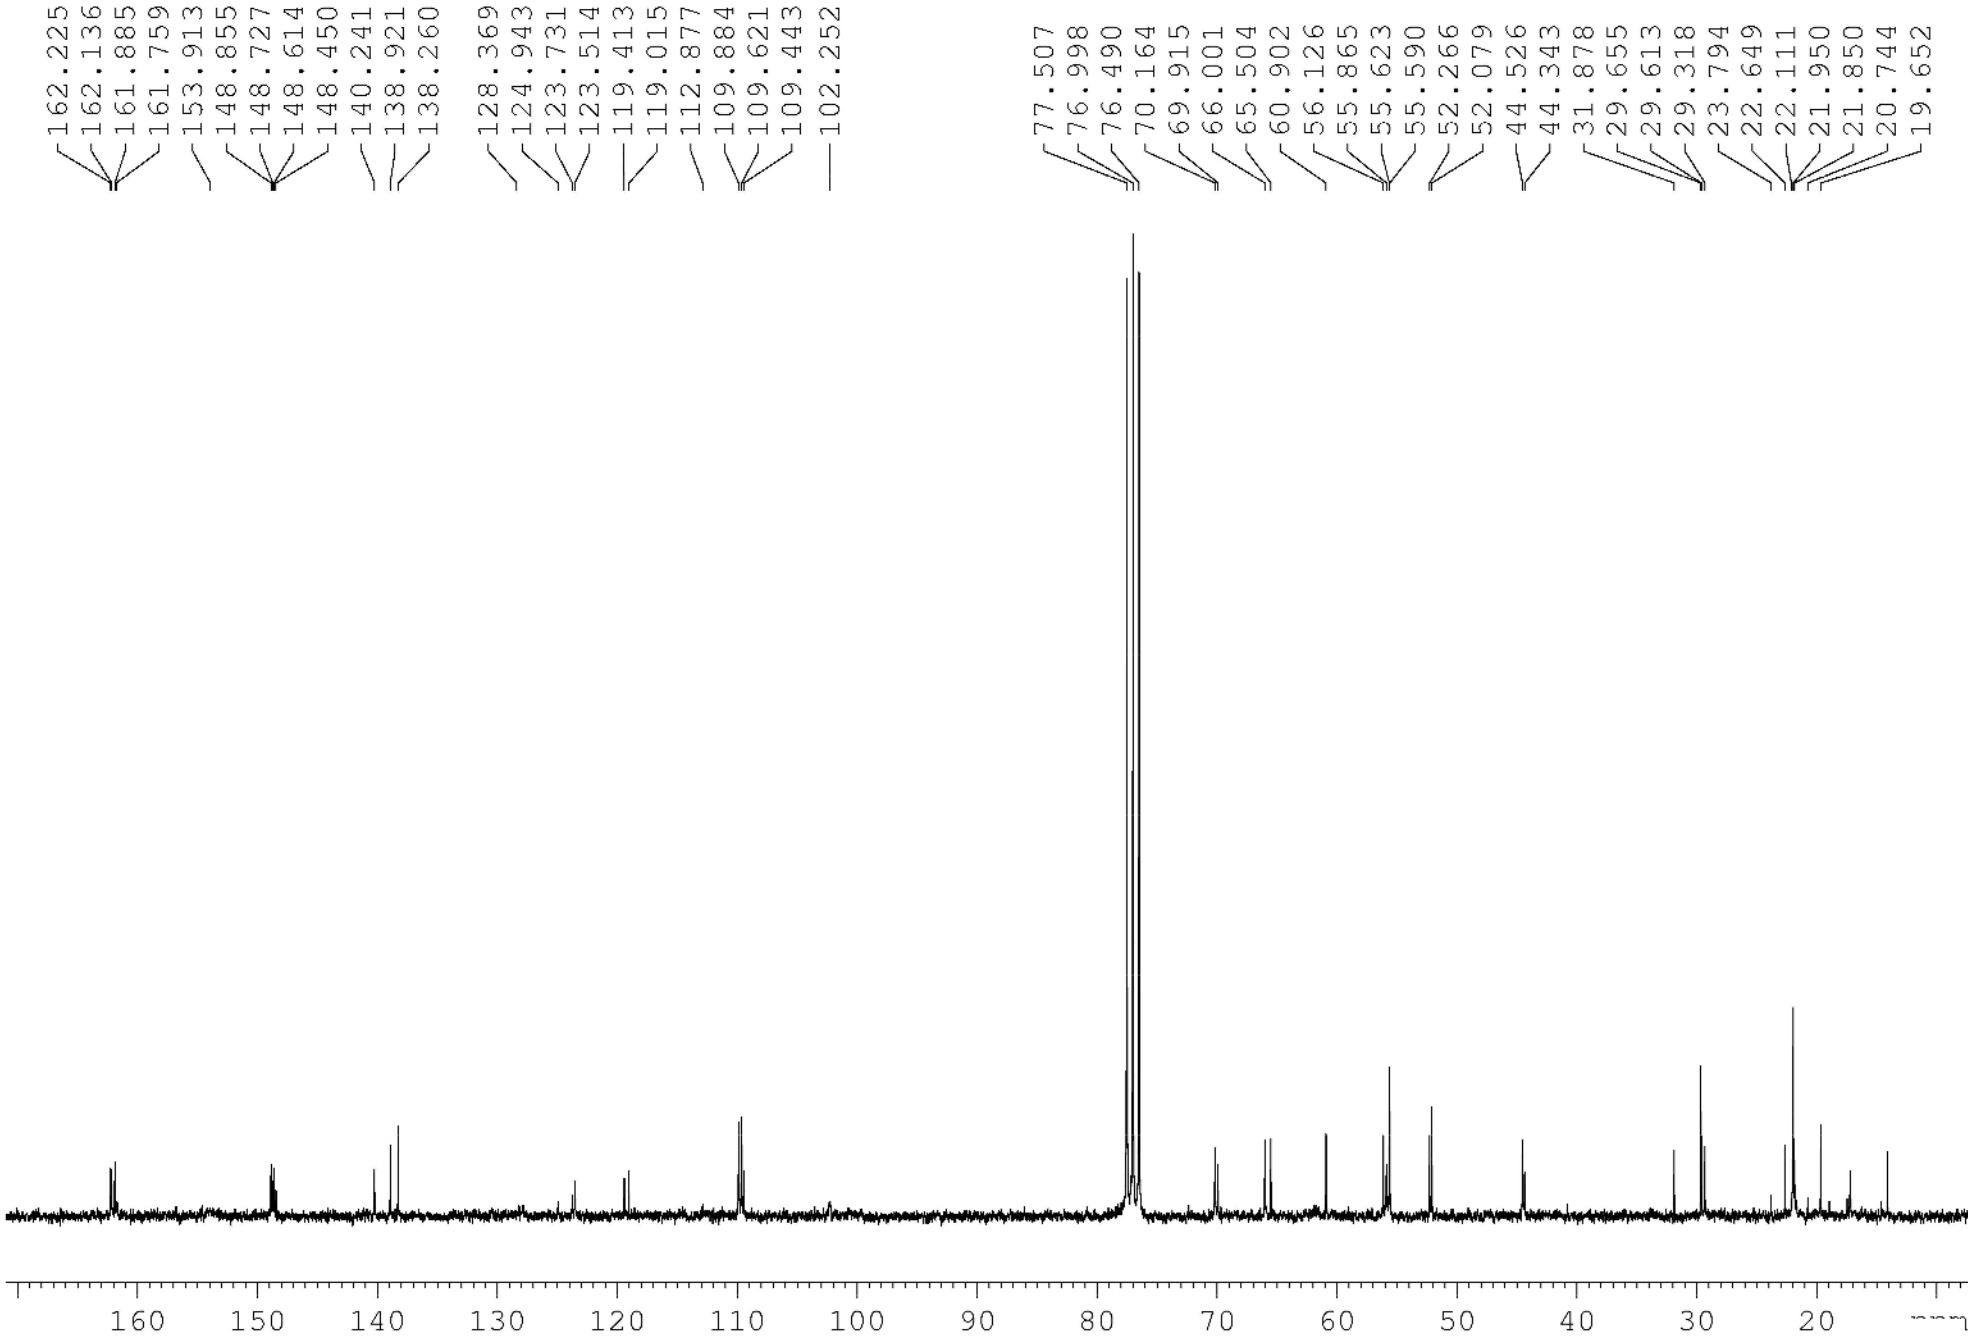

Compound 23 + 24

HRMS

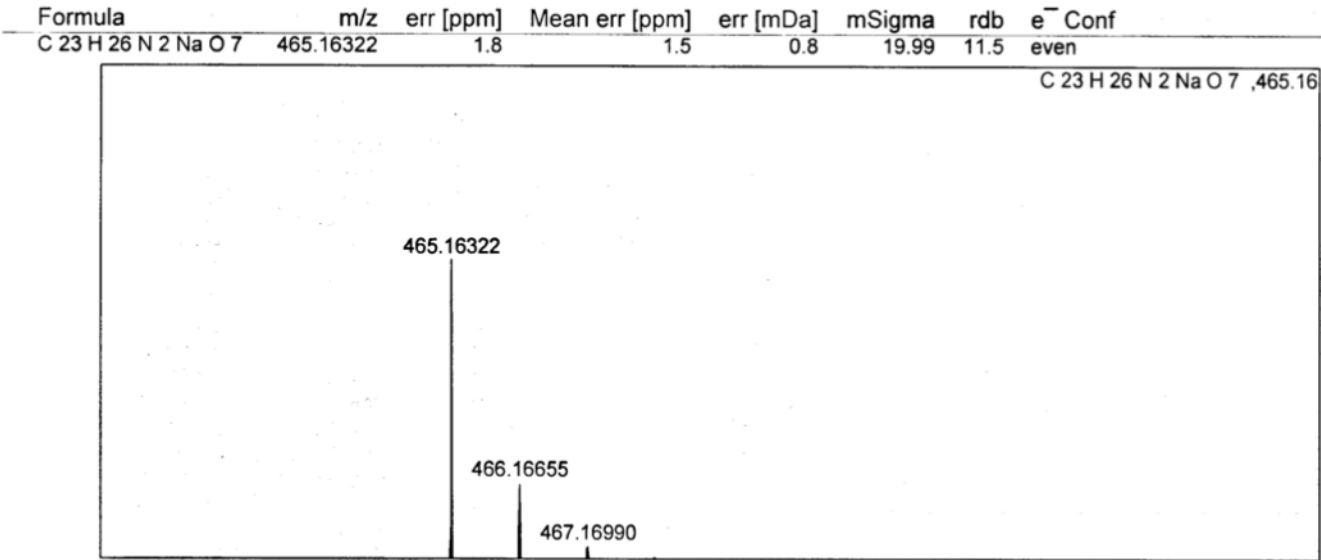

**Compound 25**

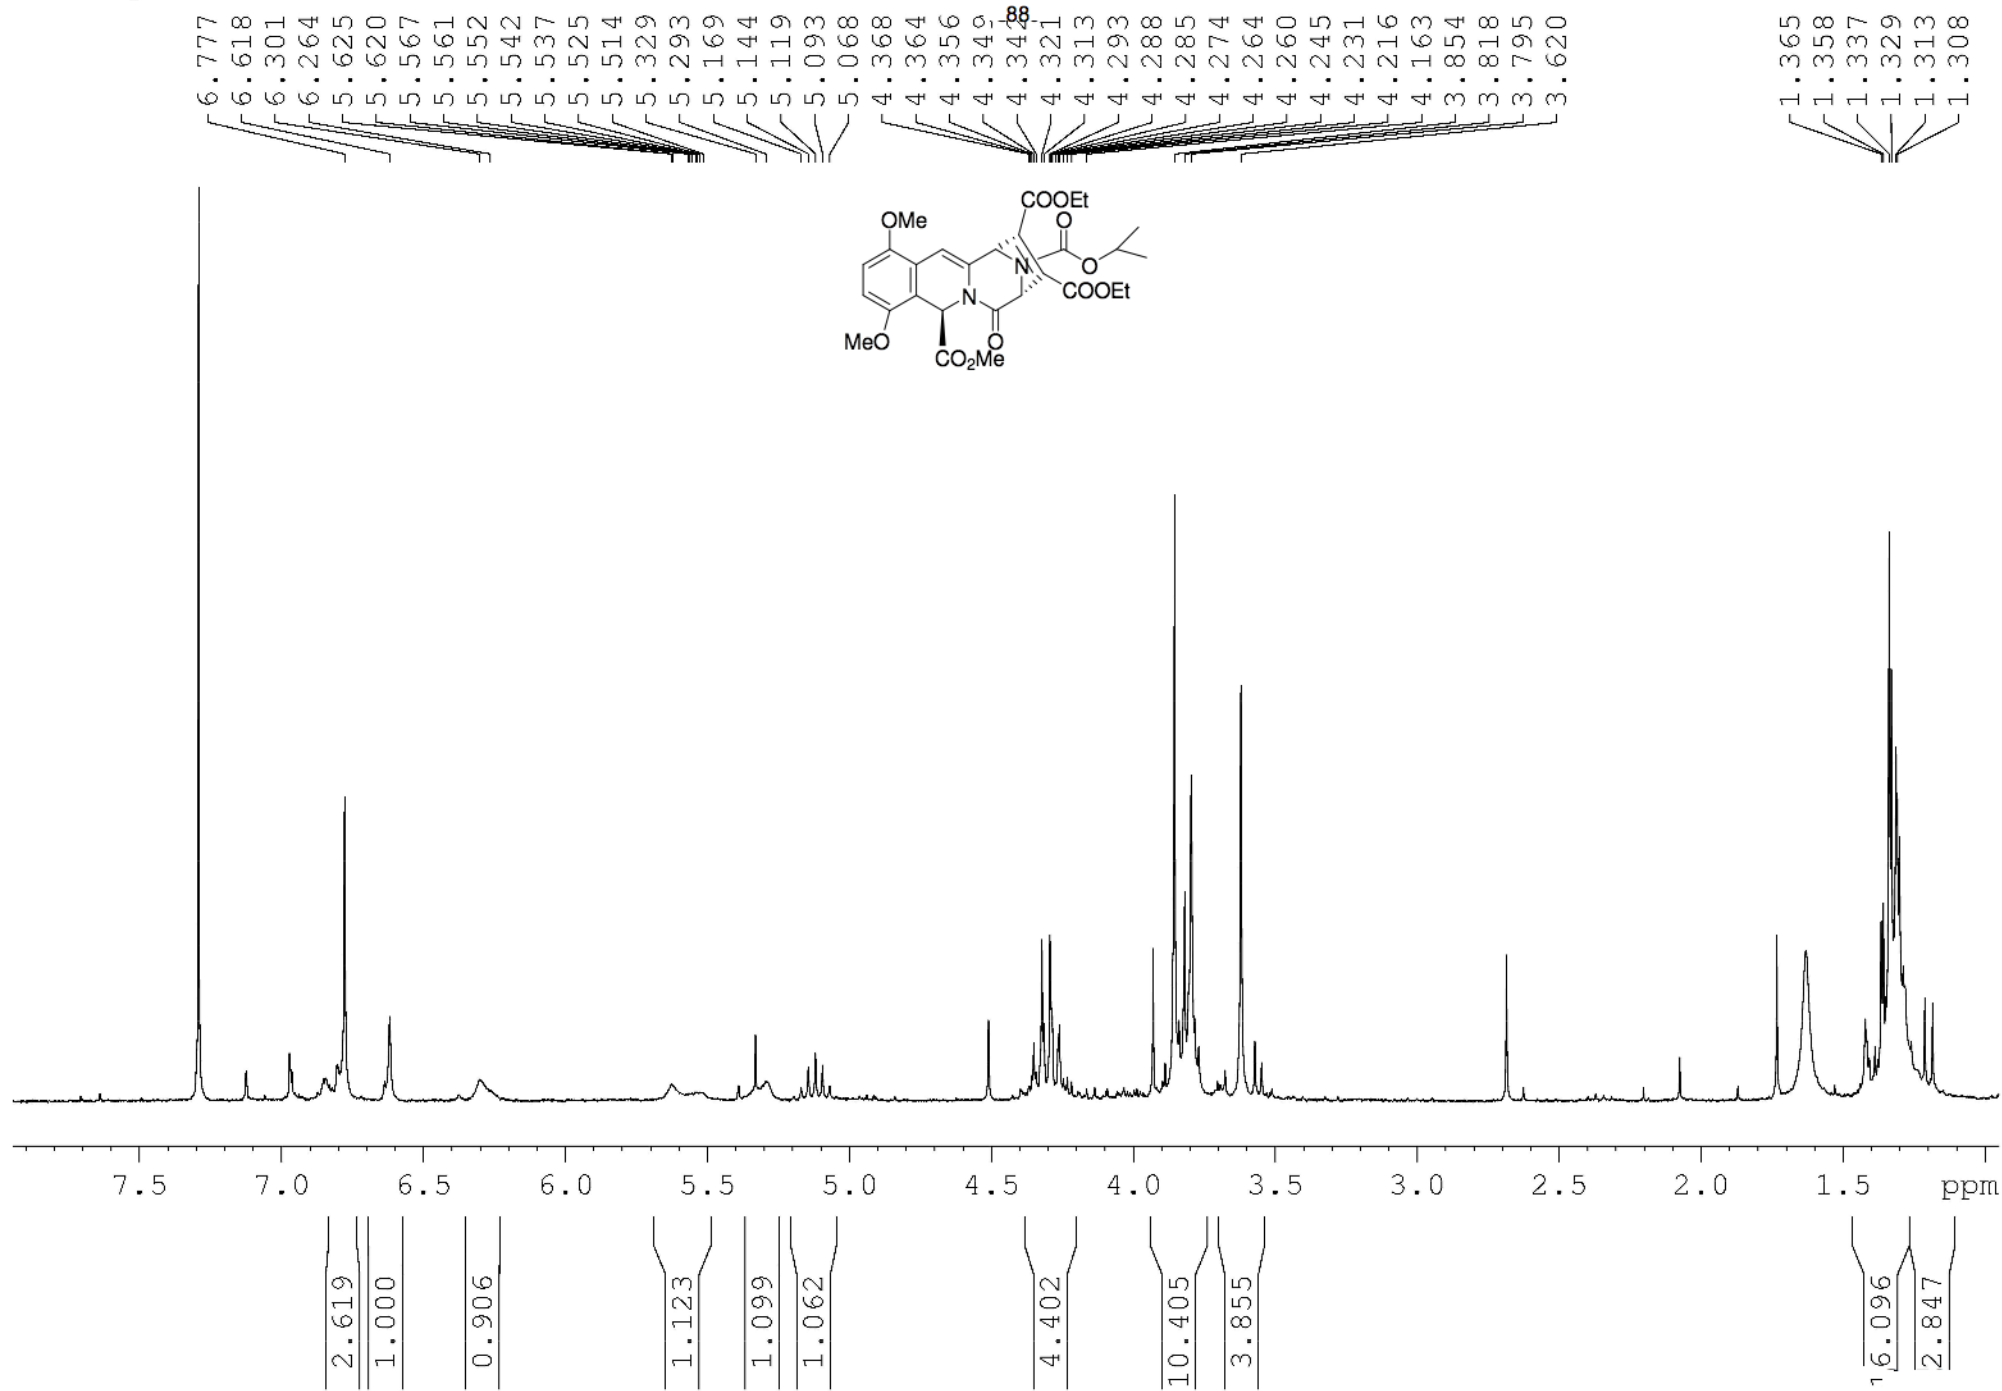

Compound 25

89

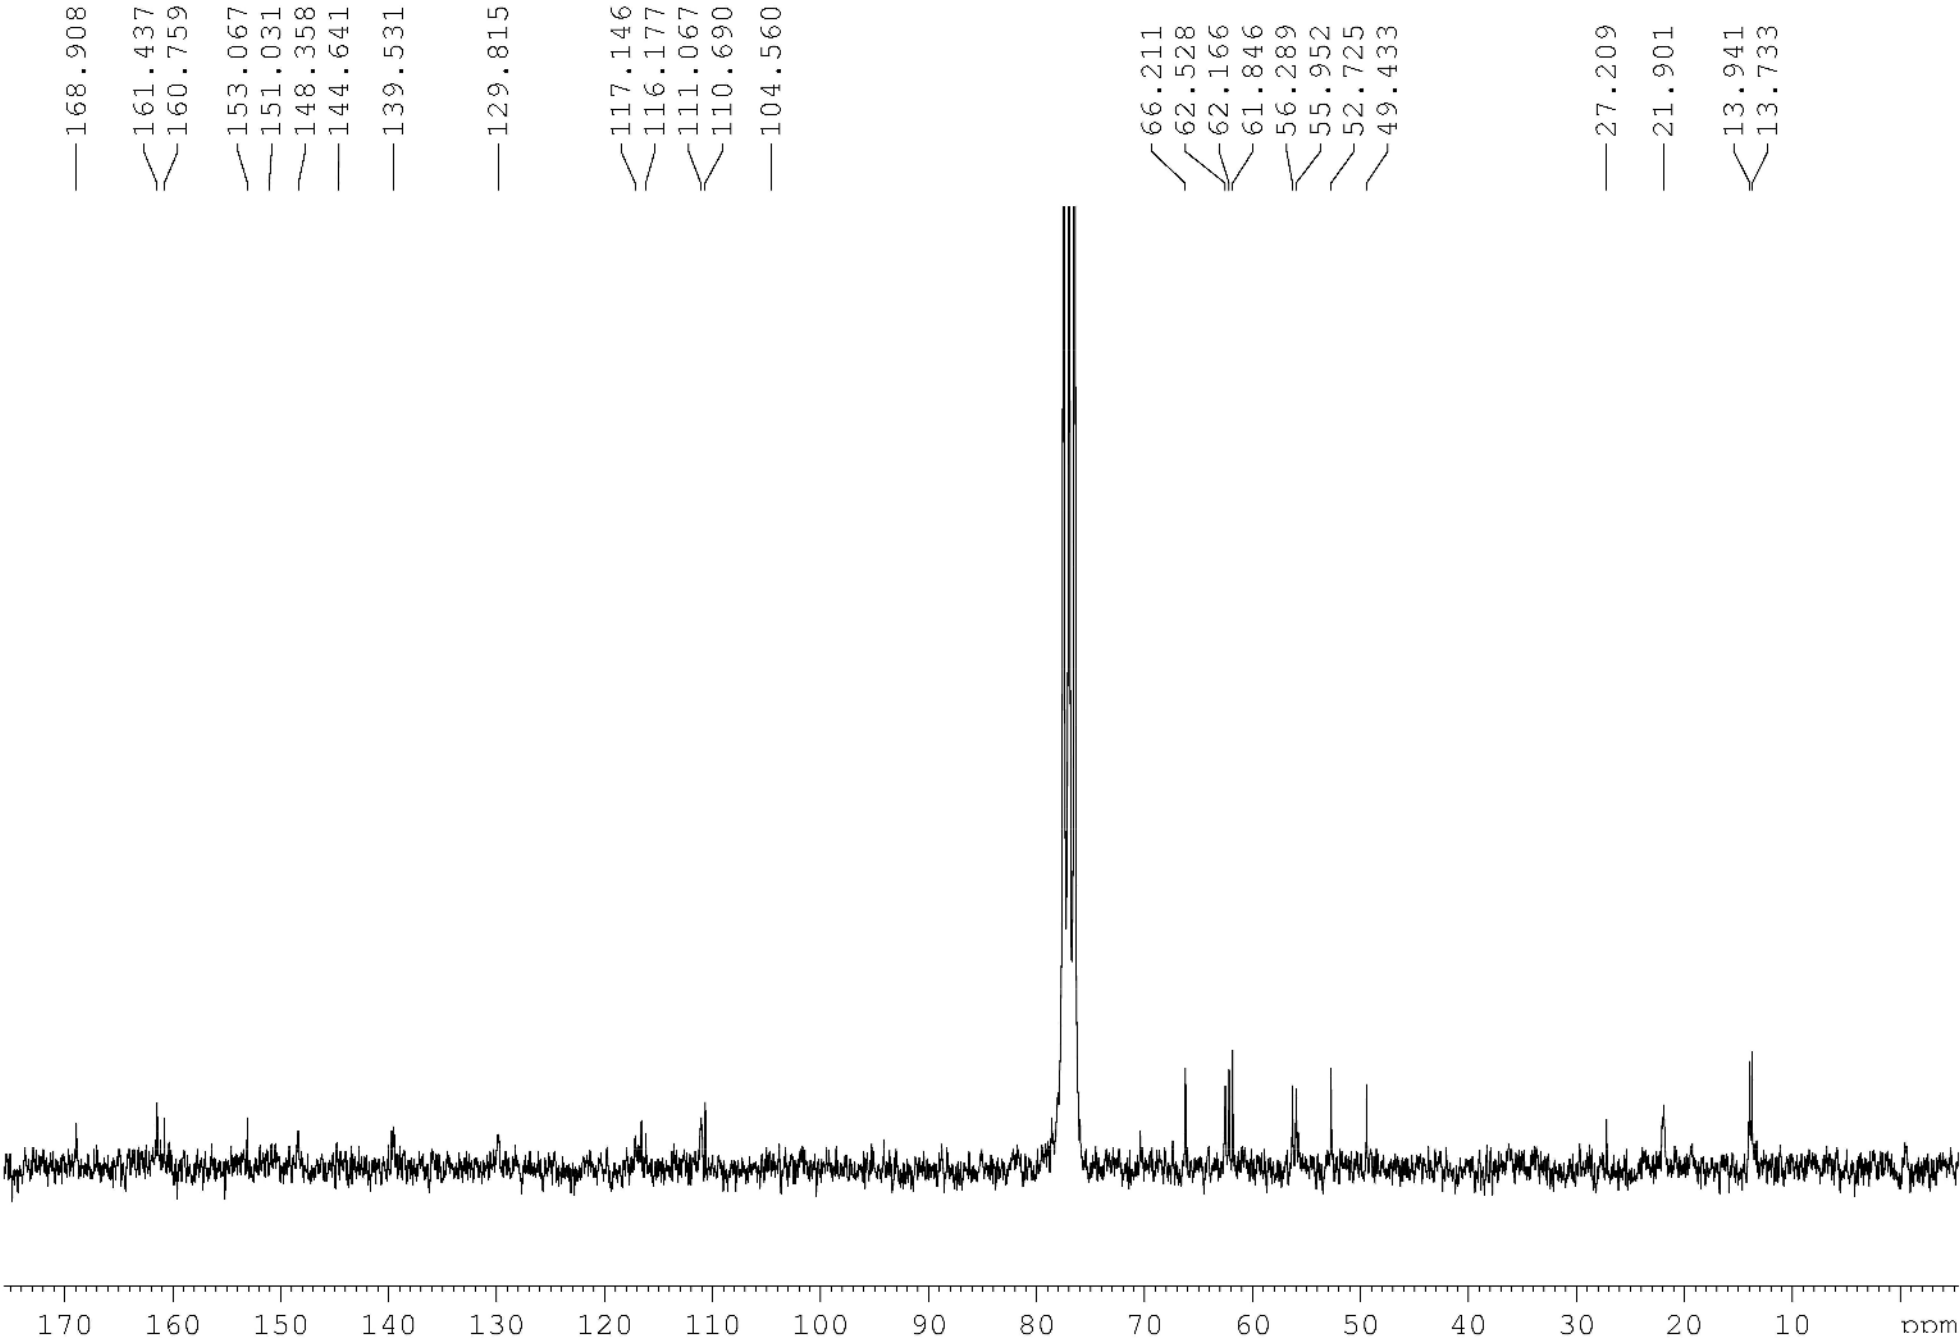

Compound 25

HRMS

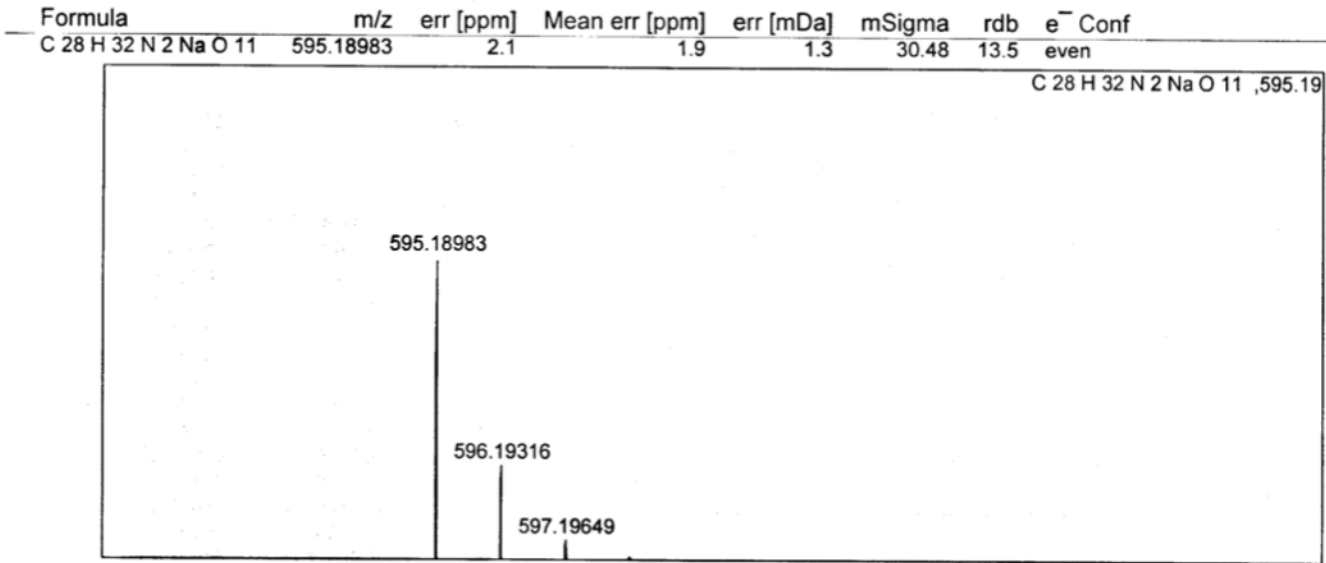

Supplement: c1ob05181d.pdf [file c1ob05181d.pdf]
